# Supplementary material for: Erythrocytosis-inducing PHD2 mutations implicate biological role for N-terminal prolyl-hydroxylation in HIF1α oxygen-dependent degradation domain
Source: eLife journal article supplement (doi:10.7554/elife.107121), 2025-06-27
Supplement: fig2-data1 [file Figure 2 source data 1.pdf › Figure 2 source data 1.pdf]

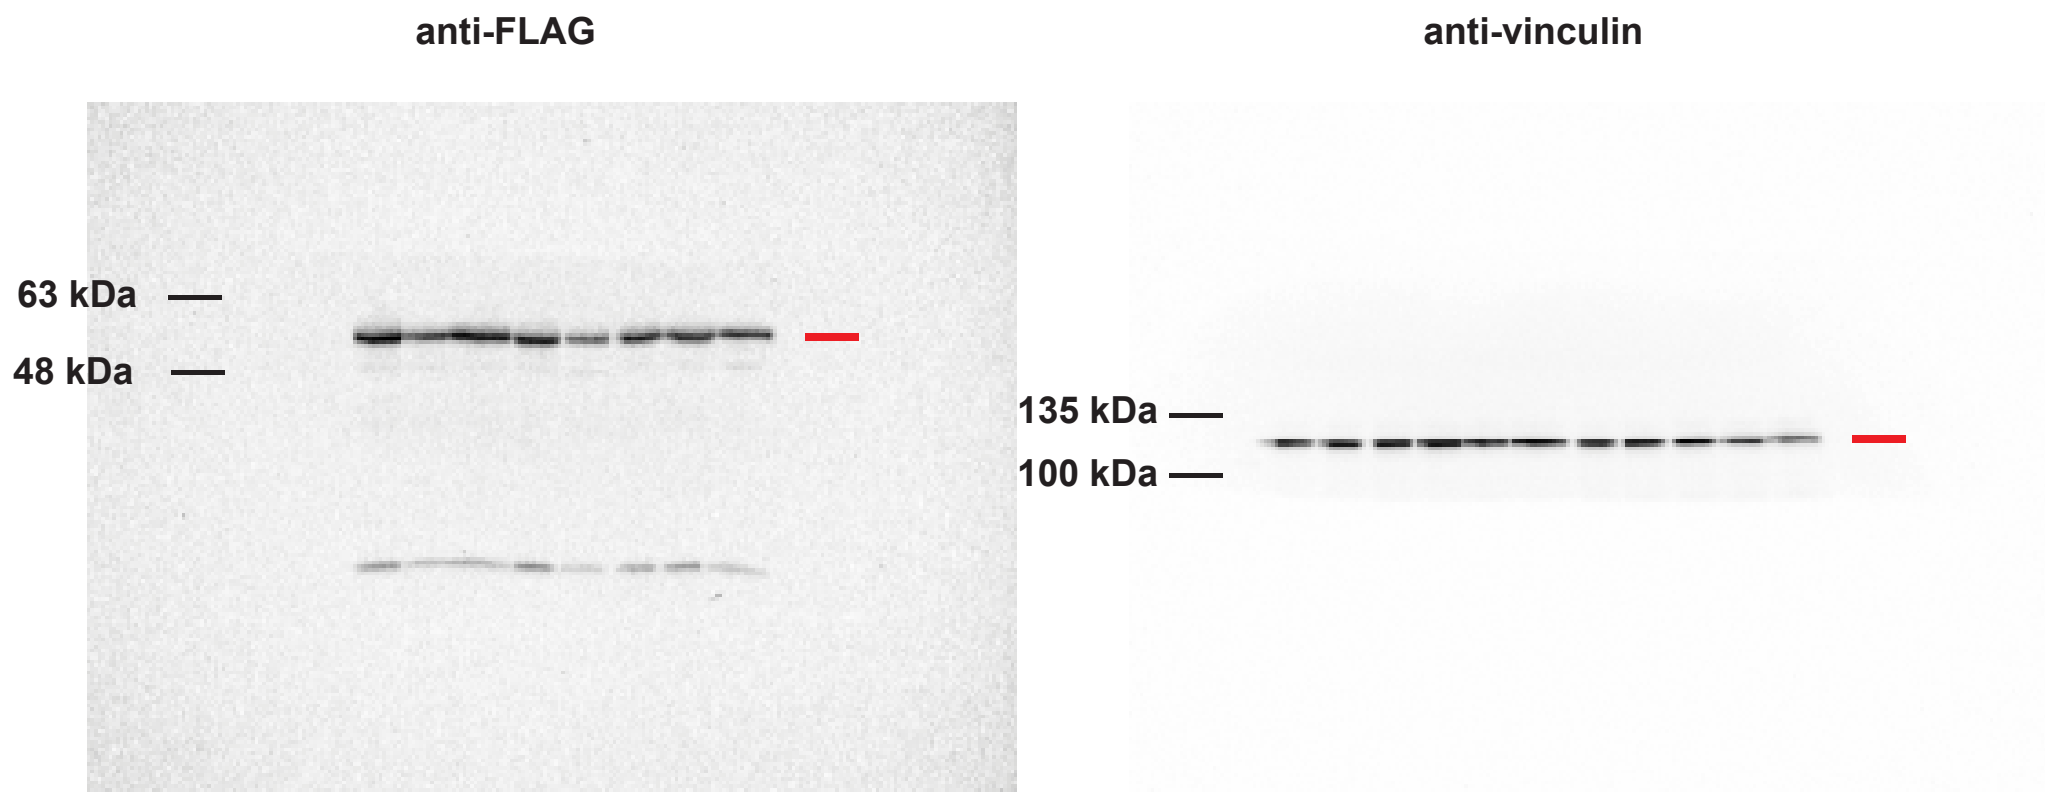

**Figure 2, Source Data 1. Original membranes corresponding to Figure 2A.** Red line indicates FLAG-PHD2 and vinculin. A BLUelf prestained protein ladder was employed, and the corresponding molecular weights are labelled.
