# Supplementary material for: Erythrocytosis-inducing PHD2 mutations implicate biological role for N-terminal prolyl-hydroxylation in HIF1α oxygen-dependent degradation domain
Source: eLife journal article supplement (doi:10.7554/elife.107121), 2025-06-27
Supplement: fig2-data3 [file Figure 2 source data 3.pdf › Figure 2 source data 3.pdf]

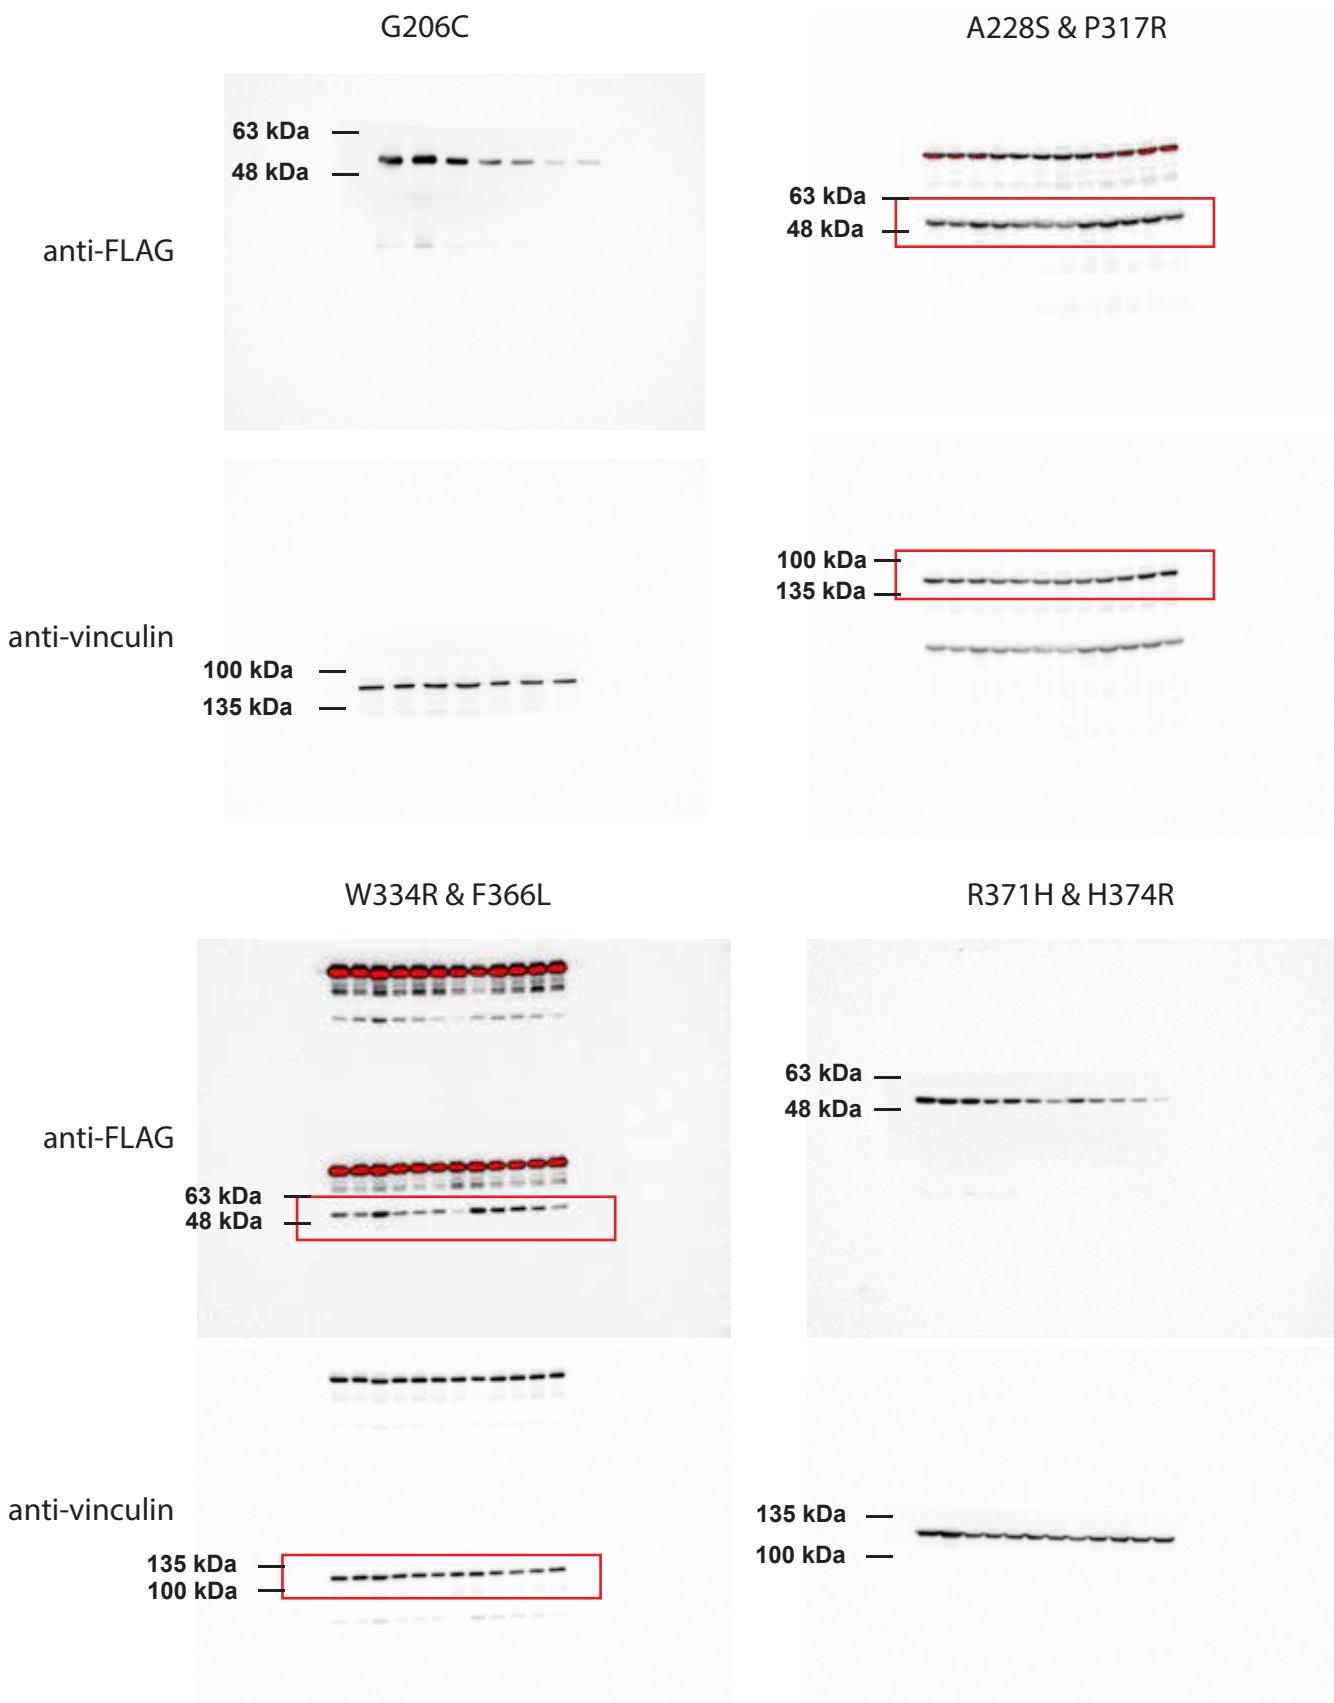

Figure 2, Source Data 3. Unedited membranes corresponding to Figure 2C. The membranes used in Figure 2C are noted by a red box. Anti-FLAG and anti-vinculin antibodies were used to detect FLAG-PHD2 and vinculin, respectively. A BLUelf prestained protein ladder was employed, and the corresponding molecular weights are labelled.
