# Supplementary material for: Erythrocytosis-inducing PHD2 mutations implicate biological role for N-terminal prolyl-hydroxylation in HIF1α oxygen-dependent degradation domain
Source: eLife journal article supplement (doi:10.7554/elife.107121), 2025-06-27
Supplement: fig2-figsupp1-data1 [file Figure 2 figure supplement 1 source data 1.pdf › Figure 2 figure supplement 1 source data 1.pdf]

anti-PHD2

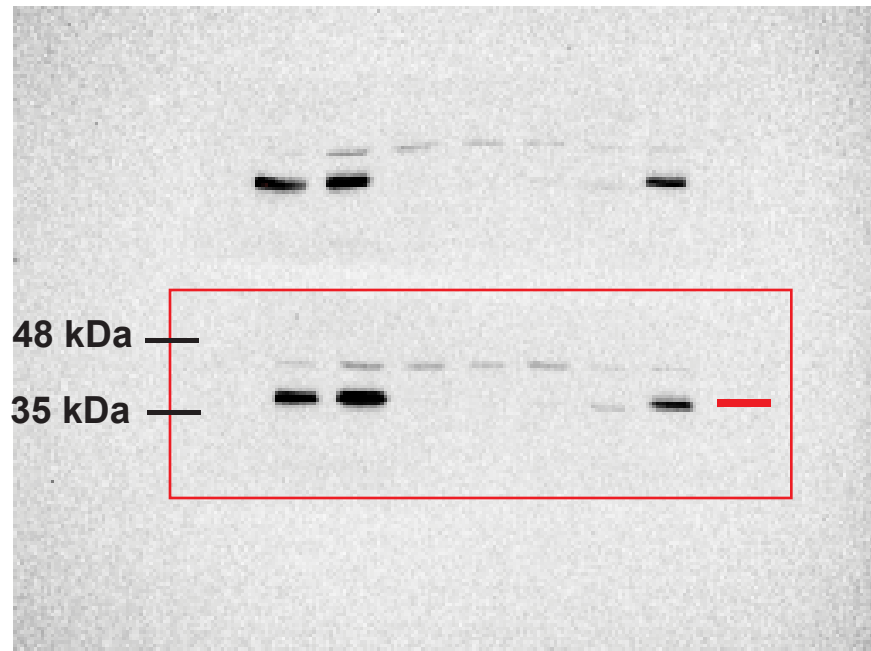

anti-HIF1 $\alpha$

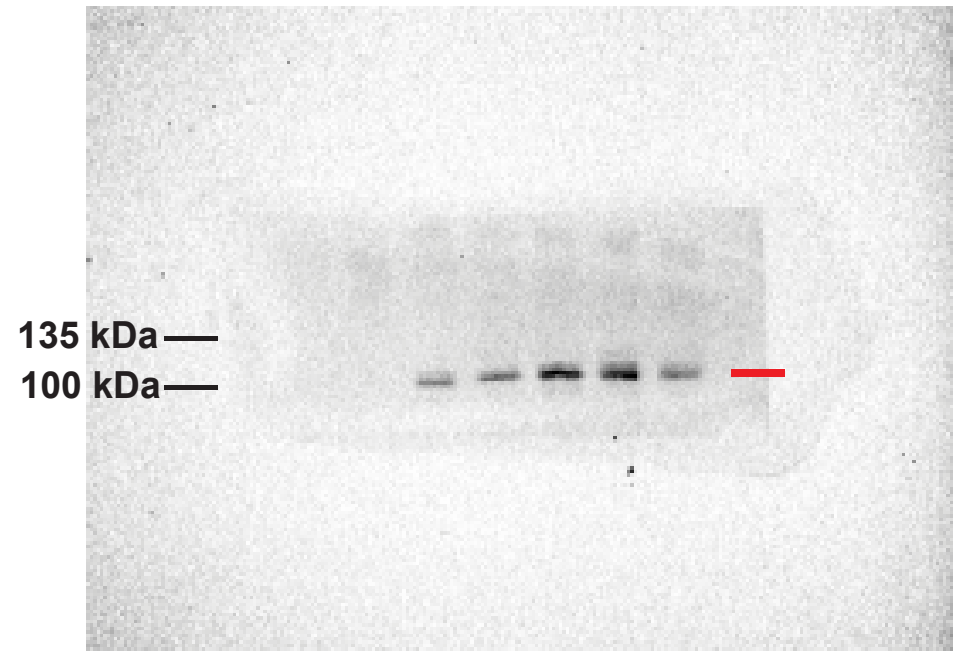

anti-vinculin

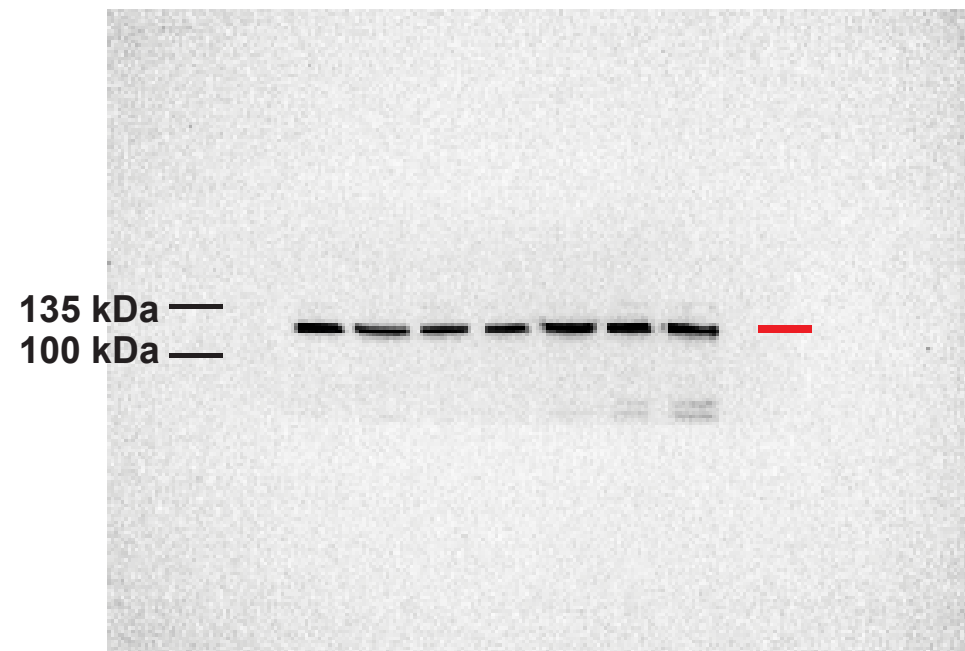

**Figure 2- Figure Supplement 1, Source Data 1.** Unedited membranes corresponding to Figure 2 - Figure Supplement 1. Replicate blots were run to monitor PHD2 KO. The membrane used in Figure 2 - Figure Supplement 1 is noted by a red box. Red dashes indicate PHD2, HIF1 $\alpha$ , and vinculin according to each indicated antibody. A BLUElf prestained protein ladder was employed, and the corresponding molecular weights are labelled.
