# Supplementary material for: Erythrocytosis-inducing PHD2 mutations implicate biological role for N-terminal prolyl-hydroxylation in HIF1α oxygen-dependent degradation domain
Source: eLife journal article supplement (doi:10.7554/elife.107121), 2025-06-27
Supplement: fig3-figsupp1-data1 [file Figure 3 figure supplement 1 source data 1.pdf › Figure 3 figure supplement 1 source data 1.pdf]

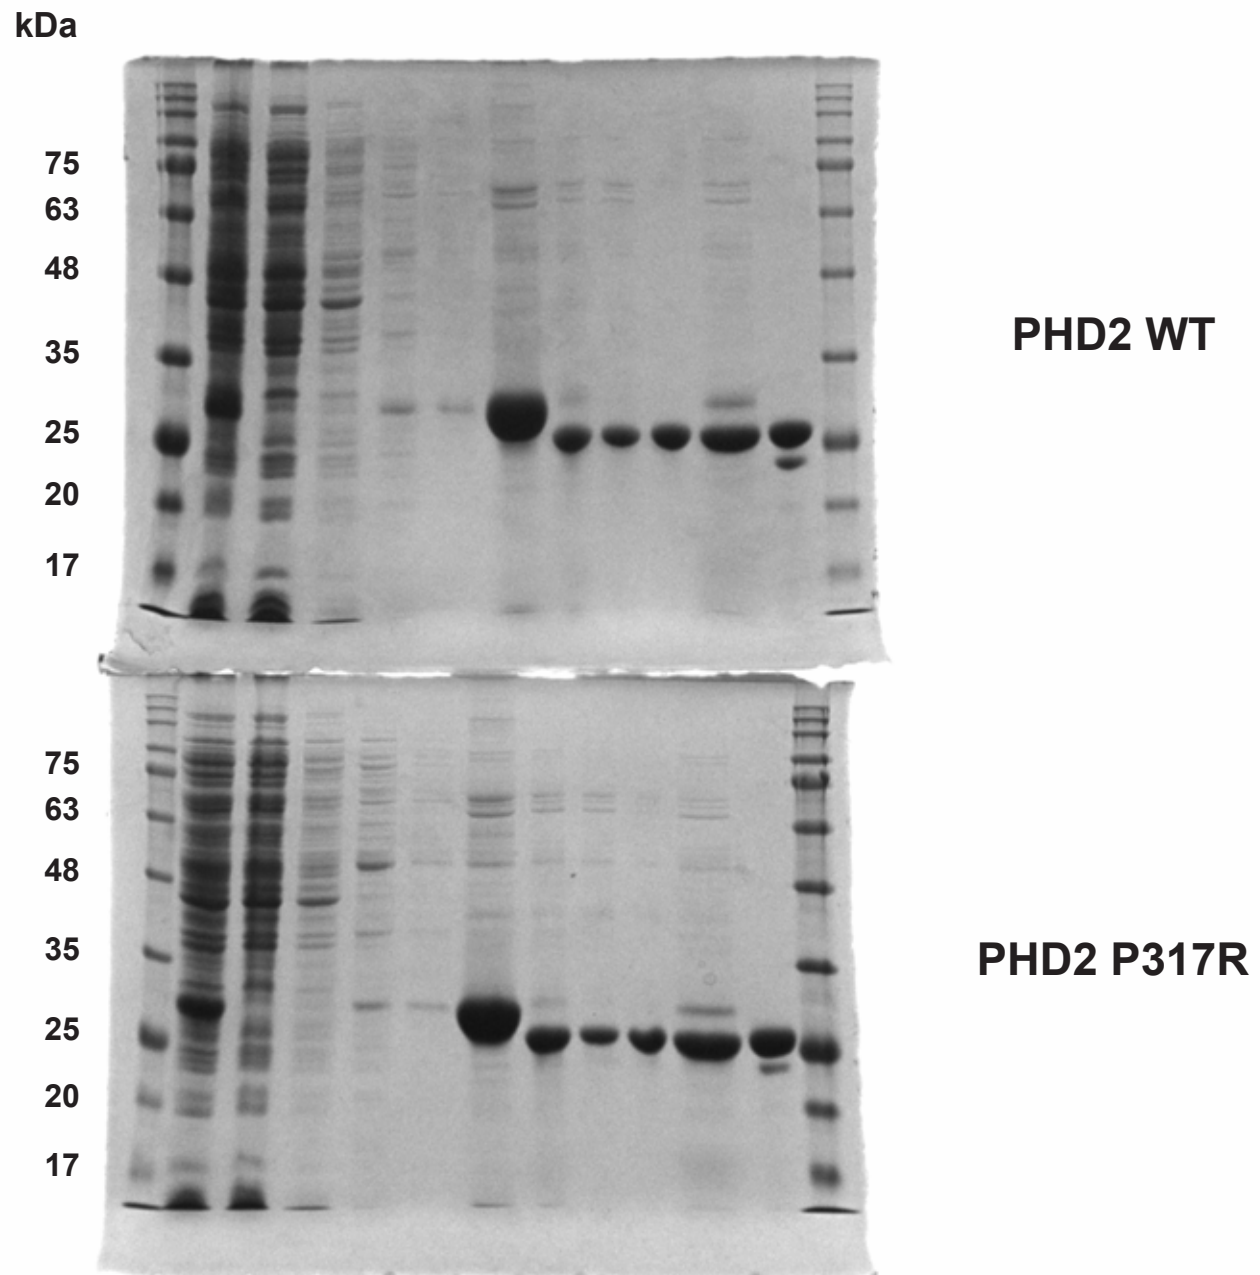

**Figure 3 - Figure Supplement 1, Source Data 1.** Unedited image of PHD2 purification SDS-PAGE gels stained with coomassie blue corresponding to Figure 3 - Figure Supplement 1. The top gel corresponds to a purification of PHD2 WT, while the bottom gel corresponds to a purification of PHD2 P317R. A BLUElf prestained protein ladder was run and the corresponding molecular weights are labelled.
