# Supplementary material for: Erythrocytosis-inducing PHD2 mutations implicate biological role for N-terminal prolyl-hydroxylation in HIF1α oxygen-dependent degradation domain
Source: eLife. 2025 Oct 20;14:RP107121. doi: 10.7554/eLife.107121 (PMC12537007; doi:10.7554/eLife.107121)
Supplement: Source data 1. [file elife-107121-data1.xlsx]

## Sheet: Fig 2a
Sample	Firefly (RLU)/Renilla (RLU) (Normalized to WT)
	Rep 1	Rep 2	Rep 3	Rep 4	Rep 5	Rep 6	Average	Standard Error			two-tailed t-test
Empty Vector	4.24125	3.45795	4.38725	3.77916	3.80797	4.26492	3.98975	0.362542		WT + no PHD2	1.94706e-09	****
PHD2-WT	1	1	1	1	1	1	1	4.71677e-09		WT + G206C	0.452875
PHD2-G206C	0.763725	0.783473	1.14444				0.897212	0.214331		WT + A228S	0.747535
PHD2-A228S	0.823589	0.898569	1.16923				0.963794	0.181815		WT + P317R	9.56461e-05	****
PHD2-P317R				1.85615	1.89569	1.72231	1.82472	0.0908657		WT + W334R	0.114797
PHD2-W334R				0.807402	0.988307	0.705247	0.833652	0.143344		WT + F366L	0.319495
PHD2-F366L				0.998678	0.983245	0.795022	0.925648	0.113389		WT + R371H	0.0707882
PHD2-R371H				0.957763	0.98034	0.910169	0.949424	0.035821		WT + H374R	2.38858e-05	****
PHD2-H374R				2.4773	2.64473	2.41826	2.51343	0.117481

## Sheet: Fig 2c
Rep	Normalized Western Blot Density (Normalized to Vinculin density)
	WT		G206C					A228S					P317R					W334R					F366L					R371H					H374R
	0 hr	24 hr	0 hr	3hr	6 hr	12 hr	24 hr	0 hr	3hr	6 hr	12 hr	24 hr	0 hr	3hr	6 hr	12 hr	24 hr	0 hr	3hr	6 hr	12 hr	24 hr	0 hr	3hr	6 hr	12 hr	24 hr	0 hr	3hr	6 hr	12 hr	24 hr	0 hr	3hr	6 hr	12 hr	24 hr
1	2735625	2.77321e+06	928725	317316	192636	88587.5	41087	3274770	3.08234e+06	2.74399e+06	2.70397e+06	2.02664e+06	3240180	3.03911e+06	2.80099e+06	2.41167e+06	1.98039e+06	4168206	3.13721e+06	2.90545e+06	2.97636e+06	2.05701e+06	3393270	3.49671e+06	2.16663e+06	1.97825e+06	1.99176e+06	2597595	2.00045e+06	1.25194e+06	1.02757e+06	535180	1239900	472817	366381	259202	165814
2	1367002	962204	1534152	450416	229601	143663	82191.3	2058602	1.63255e+06	1.82776e+06	1.64325e+06	1.64372e+06	1751152	1.49044e+06	1.20676e+06	1.26896e+06	1.21434e+06	3200078	1.42828e+06	1.14527e+06	657443	245981	998396	1.01532e+06	836863	771535	323438	2023120	1.11049e+06	862442	907246	688517	1243620	518882	557637	315213	140549
3	1939834	1.776e+06	2819455	1.68837e+06	1.17588e+06	904057	370811	1705275	1.81647e+06	1.67842e+06	1.28063e+06	1.19714e+06	1590238	1.34155e+06	932915	775096	629546	2301978	1.03702e+06	927112	1.36842e+06	304168	2421720	2.01155e+06	2.33087e+06	1.62606e+06	808993	2338260	1.555e+06	1.94786e+06	1.25481e+06	830951	1382880	711267	476207	413613	154629
4	1405440	1.13732e+06																										4190571	3.39951e+06	2.56888e+06	1.96762e+06	956411	3508617	1.50444e+06	1.59981e+06	1.07632e+06	361922
5	3127536	3.5768e+06
6	7178139	3.61255e+06
7	3471870	2.65946e+06
8	4817300	3.56566e+06
9	2899470	1.57772e+06
10	4946361	2.92243e+06
11	3016170	2.08998e+06
12	1147748	1.85911e+06
13	1182370	777914
14	2872560	3.08907e+06
15	1723155	1.36386e+06
16	1506945	1.20435e+06
			Normalized Density (Normalized to O hr)								Normalized Density (Normalized to O hr)								Normalized Density (Normalized to O hr)								Normalized Density (Normalized to O hr)
		Time	Rep 1	Rep 2	Rep 3	Average	Std Dev			Time	Rep 1	Rep 2	Rep 3	Average	Std Dev			Time	Rep 1	Rep 2	Rep 3	Average	Std Dev			Time	Rep 1	Rep 2	Rep 3	Rep 4	Average	Std Dev
	WT	0	1	1	1	1	0		WT	0	1	1	1	1	0		WT	0	1	1	1	1	0		WT	0	1	1	1	1	1	0
		24	0.809225	1.14365	0.503271	0.818715	0.320293			24	1.01374	0.703879	0.91554	0.877719	0.158354			24	0.692926	1.61979	0.657928	0.990215	0.545511			24	0.766002	0.740178	0.544142	0.590823	0.660286	0.109351
	G206C	0	1	1	1	1	0		A228S	0	1	1	1	1	0		W334R	0	1	1	1	1	0		R371H	0	1	1	1	1	1	0
		3	0.341668	0.293593	0.598827	0.411363	0.164119			3	0.94124	0.793036	1.0652	0.93316	0.136264			3	0.752653	0.446327	0.450492	0.549824	0.175668			3	0.770115	0.5489	0.665024	0.811229	0.698817	0.117384
		6	0.20742	0.14966	0.417058	0.258046	0.140704			6	0.837918	0.887864	0.984252	0.903345	0.0743851			6	0.697051	0.357888	0.402746	0.485895	0.184237			6	0.481962	0.426293	0.83304	0.613014	0.588577	0.180796
		12	0.0953861	0.0936432	0.32065	0.169893	0.130562			12	0.825699	0.798234	0.750982	0.791638	0.0377927			12	0.714062	0.205446	0.594456	0.504654	0.265934			12	0.395586	0.448439	0.536643	0.469534	0.462551	0.0583719
		24	0.0442403	0.0535744	0.131519	0.0764444	0.0479234			24	0.618866	0.798466	0.702024	0.706452	0.0898819			24	0.493499	0.0768671	0.132133	0.234166	0.226282			24	0.206029	0.340324	0.355372	0.228229	0.282489	0.0762606
									P317R	0	1	1	1	1	0		F366L	0	1	1	1	1	0		H374R	0	1	1	1	1	1	0
										3	0.937945	0.851117	0.843614	0.877559	0.0524305			3	1.03048	1.01695	0.830629	0.959353	0.111683			3	0.381335	0.417235	0.514337	0.428784	0.435423	0.0563556
										6	0.864454	0.689125	0.586651	0.71341	0.140485			6	0.638509	0.838207	0.962487	0.813068	0.163445			6	0.295492	0.448398	0.344359	0.455966	0.386054	0.0789818
										12	0.744302	0.724642	0.487409	0.652118	0.14298			12	0.582991	0.772774	0.67145	0.675739	0.0949644			12	0.209051	0.253464	0.299095	0.306765	0.267094	0.0452864
										24	0.611198	0.693451	0.395881	0.566844	0.153663			24	0.586973	0.323957	0.334057	0.414996	0.149022			24	0.133732	0.113016	0.111816	0.103152	0.115429	0.012969

## Sheet: Fig 3a
PHD2 (181-426) Superdex 200 Increase Elution Profile (normalized to molecular concentration)
Sample	WT		G206C		A228S		P317R		W334R		F366L		R371H		H374R
Monomeric elution (mL)	16.48		16.23		16.55		16.74		16.68		16.45		16.48		NA
	Elution Volume (ml)	Absorbance at 280 nm (normalized)	Elution Volume (ml)	Absorbance at 280 nm (normalized)	Elution Volume (ml)	Absorbance at 280 nm (normalized)	Elution Volume (ml)	Absorbance at 280 nm (normalized)	Elution Volume (ml)	Absorbance at 280 nm (normalized)	Elution Volume (ml)	Absorbance at 280 nm (normalized)	Elution Volume (ml)	Absorbance at 280 nm (normalized)	Elution Volume (ml)	Absorbance at 280 nm (normalized)
	0	6.22001	0	-10.4756	0	-6.8891	0	0	0	12.5575	0	0	0	0	0	-43.0147
	0.0319361	-0.0272093	0.03	-0.685668	0.0319466	-0.0459735	0.0319466	0.0319413	0.0319466	7.10506	0.0319361	0.0319466	0.0319466	0.0319413	0.0319361	-7.27468
	0.0638722	0.223221	0.06	0.870783	0.0638932	1.66033	0.0638932	0.0638827	0.0638932	8.62225	0.0638722	0.0638932	0.0638932	0.0638827	0.0638722	-2.32255
	0.0958082	1.52699	0.1	2.40904	0.0958398	3.2812	0.0958398	0.095824	0.0958398	3.10212	0.0958082	0.0958398	0.0958398	0.095824	0.0958082	-2.86051
	0.127744	1.86354	0.13	0.987272	0.127786	1.81331	0.127786	0.127765	0.127786	-0.5554	0.127744	0.127786	0.127786	0.127765	0.127744	-4.11026
	0.15968	1.58964	0.16	0.181794	0.159733	0.506522	0.159733	0.159707	0.159733	-1.46301	0.15968	0.159733	0.159733	0.159707	0.15968	-3.21122
	0.191616	2.06866	0.19	0.526665	0.19168	0.668039	0.19168	0.191648	0.19168	-0.846647	0.191616	0.19168	0.19168	0.191648	0.191616	2.20992
	0.223553	5.3691	0.22	10.3094	0.223626	4.19742	0.223626	0.223589	0.223626	2.03873	0.223553	0.223626	0.223626	0.223589	0.223553	13.5945
	0.255489	11.7657	0.26	28.7576	0.255573	8.45301	0.255573	0.255531	0.255573	8.46647	0.255489	0.255573	0.255573	0.255531	0.255489	21.1059
	0.287425	14.9032	0.29	37.8395	0.28752	8.90787	0.28752	0.287472	0.28752	12.8149	0.287425	0.28752	0.28752	0.287472	0.287425	21.6693
	0.319361	14.2466	0.32	37.0118	0.319466	7.97538	0.319466	0.319413	0.319466	13.2957	0.319361	0.319466	0.319466	0.319413	0.319361	21.1557
	0.351297	13.3936	0.35	35.571	0.351413	7.27235	0.351413	0.351355	0.351413	13.1874	0.351297	0.351413	0.351413	0.351355	0.351297	21.0106
	0.383233	12.6143	0.38	34.4761	0.383359	6.60309	0.383359	0.383296	0.383359	13.0384	0.383233	0.383359	0.383359	0.383296	0.383233	20.7627
	0.415169	11.9187	0.42	33.3971	0.415306	5.96597	0.415306	0.415238	0.415306	12.6794	0.415169	0.415306	0.415306	0.415238	0.415169	20.1667
	0.447105	11.2034	0.45	32.2371	0.447253	5.35001	0.447253	0.447179	0.447253	12.1579	0.447105	0.447253	0.447253	0.447179	0.447105	19.7284
	0.479041	10.6034	0.48	31.3351	0.479199	4.82925	0.479199	0.47912	0.479199	11.7447	0.479041	0.479199	0.479199	0.47912	0.479041	19.0981
	0.510977	9.99088	0.51	30.1013	0.511146	4.39148	0.511146	0.511062	0.511146	11.2435	0.510977	0.511146	0.511146	0.511062	0.510977	17.9224
	0.542913	9.29039	0.54	28.3211	0.543092	3.96145	0.543092	0.543003	0.543092	10.5187	0.542913	0.543092	0.543092	0.543003	0.542913	16.5943
	0.574849	8.68455	0.58	26.5073	0.575039	3.60505	0.575039	0.574944	0.575039	9.7466	0.574849	0.575039	0.575039	0.574944	0.574849	15.3838
	0.606785	8.16757	0.61	24.7684	0.606986	3.3109	0.606986	0.606886	0.606986	9.10992	0.606785	0.606986	0.606986	0.606886	0.606785	14.194
	0.638722	7.64511	0.64	23.1735	0.638932	3.03465	0.638932	0.638827	0.638932	8.54098	0.638722	0.638932	0.638932	0.638827	0.638722	13.0531
	0.670658	7.13537	0.67	21.5588	0.670879	2.7934	0.670879	0.670768	0.670879	7.97203	0.670658	0.670879	0.670879	0.670768	0.670658	12.0644
	0.702594	6.64677	0.7	20.0675	0.702826	2.54725	0.702826	0.70271	0.702826	7.47759	0.702594	0.702826	0.702826	0.70271	0.702594	11.0548
	0.73453	6.17902	0.73	18.7931	0.734772	2.36702	0.734772	0.734651	0.734772	6.92896	0.73453	0.734772	0.734772	0.734651	0.73453	10.1145
	0.766466	5.7049	0.77	17.6416	0.766719	2.17418	0.766719	0.766592	0.766719	6.40743	0.766466	0.766719	0.766719	0.766592	0.766466	9.27054
	0.798402	5.2574	0.8	16.5936	0.798665	2.0029	0.798665	0.798534	0.798665	6.00781	0.798402	0.798665	0.798665	0.798534	0.798402	8.43399
	0.830338	4.76968	0.83	15.5752	0.830612	1.85114	0.830612	0.830475	0.830612	5.55401	0.830338	0.830612	0.830612	0.830475	0.830338	7.62572
	0.862274	4.28891	0.86	14.5876	0.862559	1.63918	0.862559	0.862416	0.862559	5.1002	0.862274	0.862559	0.862559	0.862416	0.862274	6.90708
	0.89421	3.85473	0.89	13.681	0.894505	1.44023	0.894505	0.894358	0.894505	4.70736	0.89421	0.894505	0.894505	0.894358	0.89421	6.21557
	0.926146	3.38755	0.93	12.8134	0.926452	1.26285	0.926452	0.926299	0.926452	4.33483	0.926146	0.926452	0.926452	0.926299	0.926146	5.53096
	0.958082	2.91431	0.96	11.9349	0.958398	1.07814	0.958398	0.95824	0.958398	3.94876	0.958082	0.958398	0.958398	0.95824	0.958082	4.86083
	0.990018	2.45526	0.99	11.145	0.990345	0.940218	0.990345	0.990182	0.990345	3.59656	0.990018	0.990345	0.990345	0.990182	0.990018	4.22408
	1.02195	1.98085	1.02	10.4365	1.02229	0.802705	1.02229	1.02212	1.02229	3.23081	1.02195	1.02229	1.02229	1.02212	1.02195	3.64308
	1.05389	1.49978	1.05	9.73845	1.05424	0.672107	1.05424	1.05406	1.05424	2.85828	1.05389	1.05424	1.05424	1.05406	1.05389	3.08362
	1.08583	1.08761	1.09	9.04036	1.08618	0.486586	1.08618	1.08601	1.08618	2.55349	1.08583	1.08618	1.08618	1.08601	1.08583	2.524
	1.11776	0.709018	1.12	8.41431	1.11813	0.307981	1.11813	1.11795	1.11813	2.24869	1.11776	1.11813	1.11813	1.11795	1.11776	1.95007
	1.1497	0.281201	1.15	7.85414	1.15008	0.203422	1.15008	1.14989	1.15008	1.91681	1.1497	1.15008	1.15008	1.14989	1.1497	1.45212
	1.18163	-0.151811	1.18	7.27333	1.18202	0.0390571	1.18202	1.18183	1.18202	1.65266	1.18163	1.18202	1.18202	1.18183	1.18163	0.975383
	1.21357	-0.570636	1.21	6.67743	1.21397	-0.106593	1.21397	1.21377	1.21397	1.3885	1.21357	1.21397	1.21397	1.21377	1.21357	0.540087
	1.24551	-0.915364	1.25	6.10416	1.24592	-0.204236	1.24592	1.24571	1.24592	1.09725	1.24551	1.24592	1.24592	1.24571	1.24551	0.111863
	1.27744	-1.23925	1.28	5.50409	1.27786	-0.355582	1.27786	1.27765	1.27786	0.778915	1.27744	1.27786	1.27786	1.27765	1.27744	-0.351226
	1.30938	-1.60365	1.31	4.98301	1.30981	-0.453225	1.30981	1.3096	1.30981	0.474122	1.30938	1.30981	1.30981	1.3096	1.30938	-0.745247
	1.34132	-1.92783	1.34	4.56831	1.34176	-0.563887	1.34176	1.34154	1.34176	0.182876	1.34132	1.34176	1.34176	1.34154	1.34132	-1.13927
	1.37325	-2.2248	1.37	4.11985	1.3737	-0.661936	1.3737	1.37348	1.3737	-0.074505	1.37325	1.3737	1.3737	1.37348	1.37325	-1.46339
	1.40519	-2.55592	1.41	3.65214	1.40565	-0.747781	1.40565	1.40542	1.40565	-0.331886	1.40519	1.40565	1.40565	1.40542	1.40519	-1.8436
	1.43712	-2.92786	1.44	3.21261	1.4376	-0.846644	1.4376	1.43736	1.4376	-0.636679	1.43712	1.4376	1.4376	1.43736	1.43712	-2.27265
	1.46906	-3.23148	1.47	2.77448	1.46954	-0.943473	1.46954	1.4693	1.46954	-0.880513	1.46906	1.46954	1.46954	1.4693	1.46906	-2.5555
	1.501	-3.49575	1.5	2.40223	1.50149	-1.00775	1.50149	1.50124	1.50149	-1.07694	1.501	1.50149	1.50149	1.50124	1.501	-2.90825
	1.53293	-3.74612	1.53	2.06351	1.53344	-1.0936	1.53344	1.53318	1.53344	-1.30722	1.53293	1.53344	1.53344	1.53318	1.53293	-3.25375
	1.56487	-4.00286	1.57	1.67955	1.56538	-1.18514	1.56538	1.56513	1.56538	-1.54428	1.56487	1.56538	1.56538	1.56513	1.56487	-3.53693
	1.5968	-4.23904	1.6	1.32574	1.59733	-1.25674	1.59733	1.59707	1.59733	-1.75425	1.5968	1.59733	1.59733	1.59707	1.5968	-3.82785
	1.62874	-4.45438	1.63	0.987021	1.62928	-1.32957	1.62928	1.62901	1.62928	-1.98454	1.62874	1.62928	1.62928	1.62901	1.62874	-4.12517
	1.66068	-4.69722	1.66	0.655839	1.66122	-1.43413	1.66122	1.66095	1.66122	-2.18774	1.66068	1.66122	1.66122	1.66095	1.66068	-4.36609
	1.69261	-4.94152	1.69	0.300646	1.69317	-1.47196	1.69317	1.69289	1.69317	-2.38416	1.69261	1.69317	1.69317	1.69289	1.69261	-4.66291
	1.72455	-5.10332	1.73	0.00101579	1.72512	-1.52445	1.72512	1.72483	1.72512	-2.62122	1.72455	1.72512	1.72512	1.72483	1.72455	-4.93278
	1.75648	-5.25875	1.76	-0.317059	1.75706	-1.58995	1.75706	1.75677	1.75706	-2.83796	1.75648	1.75706	1.75706	1.75677	1.75648	-5.16827
	1.78842	-5.48886	1.79	-0.600799	1.78901	-1.60866	1.78901	1.78872	1.78901	-3.04793	1.78842	1.78901	1.78901	1.78872	1.78842	-5.39636
	1.82036	-5.68452	1.82	-0.881984	1.82096	-1.67539	1.82096	1.82066	1.82096	-3.22403	1.82036	1.82096	1.82096	1.82066	1.82036	-5.60324
	1.85229	-5.8744	1.85	-1.16734	1.8529	-1.76693	1.8529	1.8526	1.8529	-3.3595	1.85229	1.8529	1.8529	1.8526	1.85229	-5.81751
	1.88423	-6.00204	1.88	-1.42034	1.88485	-1.78442	1.88485	1.88454	1.88485	-3.54914	1.88423	1.88485	1.88485	1.88454	1.88423	-6.04544
	1.91616	-6.13692	1.92	-1.67531	1.9168	-1.82429	1.9168	1.91648	1.9168	-3.68461	1.91616	1.9168	1.9168	1.91648	1.91616	-6.31547
	1.9481	-6.24459	1.95	-1.92355	1.94874	-1.84992	1.94874	1.94842	1.94874	-3.82685	1.9481	1.94874	1.94874	1.94842	1.9481	-6.49472
	1.98004	-6.38671	1.98	-2.15532	1.98069	-1.87515	1.98069	1.98036	1.98069	-3.94876	1.98004	1.98069	1.98069	1.98036	1.98004	-6.67413
	2.01197	-6.54938	2.01	-2.38431	2.01264	-1.87515	2.01264	2.0123	2.01264	-4.12486	2.01197	2.01264	2.01264	2.0123	2.01197	-6.9236
	2.04391	-6.66429	2.04	-2.59485	2.04458	-1.91461	2.04458	2.04425	2.04458	-4.28065	2.04391	2.04458	2.04458	2.04425	2.04391	-7.10301
	2.07585	-6.72478	2.08	-2.78474	2.07653	-1.92641	2.07653	2.07619	2.07653	-4.36193	2.07585	2.07653	2.07653	2.07619	2.07585	-7.26845
	2.10778	-6.84547	2.11	-2.92998	2.10848	-1.95326	2.10848	2.10813	2.10848	-4.50416	2.10778	2.10848	2.10848	2.10813	2.10778	-7.45493
	2.13972	-6.96587	2.14	-3.12405	2.14042	-1.97889	2.14042	2.14007	2.14042	-4.67349	2.13972	2.14042	2.14042	2.14007	2.13972	-7.63468
	2.17165	-7.04779	2.17	-3.35442	2.17237	-1.97076	2.17237	2.17201	2.17237	-4.81573	2.17165	2.17237	2.17237	2.17201	2.17165	-7.82873
	2.20359	-7.14302	2.2	-3.54432	2.20432	-1.98866	2.20432	2.20395	2.20432	-4.88346	2.20359	2.20432	2.20432	2.20395	2.20359	-7.98742
	2.23553	-7.21682	2.24	-3.67806	2.23626	-2.03422	2.23626	2.23589	2.23626	-5.01215	2.23553	2.23626	2.23626	2.23589	2.23553	-8.16716
	2.26746	-7.27585	2.27	-3.82828	2.26821	-2.06718	2.26821	2.26784	2.26821	-5.1273	2.26746	2.26821	2.26821	2.26784	2.26746	-8.36122
	2.2994	-7.38469	2.3	-3.99834	2.30016	-2.12007	2.30016	2.29978	2.30016	-5.18825	2.2994	2.30016	2.30016	2.29978	2.2994	-8.47814
	2.33133	-7.44635	2.33	-4.14299	2.3321	-2.16035	2.3321	2.33172	2.3321	-5.27631	2.33133	2.3321	2.3321	2.33172	2.33133	-8.63009
	2.36327	-7.47298	2.36	-4.28567	2.36405	-2.11966	2.36405	2.36366	2.36405	-5.39145	2.36327	2.36405	2.36405	2.36366	2.36327	-8.83779
	2.39521	-7.54071	2.4	-4.39263	2.396	-2.12495	2.396	2.3956	2.396	-5.50659	2.39521	2.396	2.396	2.3956	2.39521	-8.94764
	2.42714	-7.61539	2.43	-4.56129	2.42794	-2.12495	2.42794	2.42754	2.42794	-5.59464	2.42714	2.42794	2.42794	2.42754	2.42714	-9.09959
	2.45908	-7.67646	2.46	-4.74167	2.45989	-2.13146	2.45989	2.45948	2.45989	-5.67592	2.45908	2.45989	2.45989	2.45948	2.45908	-9.27999
	2.49101	-7.72422	2.49	-4.83969	2.49184	-2.18476	2.49184	2.49143	2.49184	-5.74365	2.49101	2.49184	2.49184	2.49143	2.49101	-9.4252
	2.52295	-7.78501	2.52	-4.89445	2.52378	-2.19778	2.52378	2.52337	2.52378	-5.81816	2.52295	2.52378	2.52378	2.52337	2.52295	-9.54903
	2.55489	-7.82524	2.56	-5.01926	2.55573	-2.21079	2.55573	2.55531	2.55573	-5.90621	2.55489	2.55573	2.55573	2.55531	2.55489	-9.73667
	2.58682	-7.8455	2.59	-5.14547	2.58768	-2.19655	2.58768	2.58725	2.58768	-5.98749	2.58682	2.58768	2.58768	2.58725	2.58682	-9.88238
	2.61876	-7.8316	2.62	-5.21333	2.61962	-2.17621	2.61962	2.61919	2.61962	-6.06199	2.61876	2.61962	2.61962	2.61919	2.61876	-9.99946
	2.65069	-7.8591	2.65	-5.32168	2.65157	-2.19045	2.65157	2.65113	2.65157	-6.15682	2.65069	2.65157	2.65157	2.65113	2.65069	-10.1445
	2.68263	-7.94073	2.68	-5.45879	2.68352	-2.24416	2.68352	2.68307	2.68352	-6.2381	2.68263	2.68352	2.68352	2.68307	2.68263	-10.2963
	2.71457	-7.96099	2.72	-5.53141	2.71546	-2.21649	2.71546	2.71501	2.71546	-6.33292	2.71457	2.71546	2.71546	2.71501	2.71457	-10.4198
	2.7465	-7.91988	2.75	-5.65008	2.74741	-2.22259	2.74741	2.74696	2.74741	-6.46161	2.7465	2.74741	2.74741	2.74696	2.7465	-10.5092
	2.77844	-7.92508	2.78	-5.84217	2.77936	-2.24944	2.77936	2.7789	2.77936	-6.55644	2.77844	2.77936	2.77936	2.7789	2.77844	-10.6277
	2.81037	-7.98645	2.81	-5.91618	2.8113	-2.22341	2.8113	2.81084	2.8113	-6.60385	2.81037	2.8113	2.8113	2.81084	2.81037	-10.7309
	2.84231	-8.00034	2.84	-5.97093	2.84325	-2.20876	2.84325	2.84278	2.84325	-6.64449	2.84231	2.84325	2.84325	2.84278	2.84231	-10.9043
	2.87425	-7.99369	2.88	-6.0896	2.8752	-2.21608	2.8752	2.87472	2.8752	-6.73931	2.87425	2.8752	2.8752	2.87472	2.87425	-11.0148
	2.90618	-7.98703	2.91	-6.13345	2.90714	-2.28932	2.90714	2.90666	2.90714	-6.85446	2.90618	2.90714	2.90714	2.90666	2.90618	-11.1598
	2.93812	-8.00729	2.94	-6.22254	2.93909	-2.30762	2.93909	2.9386	2.93909	-6.96283	2.93812	2.93909	2.93909	2.9386	2.93812	-11.3399
	2.97006	-8.05476	2.97	-6.33228	2.97104	-2.22097	2.97104	2.97055	2.97104	-7.09829	2.97006	2.97104	2.97104	2.97055	2.97006	-11.4149
	3.00199	-8.07415	3	-6.43645	3.00298	-2.26287	3.00298	3.00249	3.00298	-7.21343	3.00199	3.00298	3.00298	3.00249	3.00199	-11.5323
	3.03393	-8.0536	3.03	-6.54201	3.03493	-2.29705	3.03493	3.03443	3.03493	-7.3489	3.03393	3.03493	3.03493	3.03443	3.03393	-11.6849
	3.06586	-8.08051	3.07	-6.62495	3.06688	-2.29013	3.06688	3.06637	3.06688	-7.44372	3.06586	3.06688	3.06688	3.06637	3.06586	-11.8304
	3.0978	-8.1413	3.1	-6.62135	3.09882	-2.31657	3.09882	3.09831	3.09882	-7.49791	3.0978	3.09882	3.09882	3.09831	3.0978	-11.9477
	3.12974	-8.14854	3.13	-6.69954	3.13077	-2.32268	3.13077	3.13025	3.13077	-7.61305	3.12974	3.13077	3.13077	3.13025	3.12974	-12.0513
	3.16167	-8.17575	3.16	-6.83943	3.16271	-2.3357	3.16271	3.16219	3.16271	-7.7282	3.16167	3.16271	3.16271	3.16219	3.16167	-12.12
	3.19361	-8.18211	3.19	-6.95532	3.19466	-2.36987	3.19466	3.19413	3.19466	-7.80947	3.19361	3.19466	3.19466	3.19413	3.19361	-12.2519
	3.22554	-8.19542	3.23	-7.06366	3.22661	-2.3894	3.22661	3.22608	3.22661	-7.9043	3.22554	3.22661	3.22661	3.22608	3.22554	-12.404
	3.25748	-8.20903	3.26	-7.14046	3.25855	-2.40933	3.25855	3.25802	3.25855	-8.03976	3.25748	3.25855	3.25855	3.25802	3.25748	-12.514
	3.28942	-8.24289	3.29	-7.2488	3.2905	-2.40974	3.2905	3.28996	3.2905	-8.14813	3.28942	3.2905	3.2905	3.28996	3.28942	-12.6316
	3.32135	-8.26286	3.32	-7.33174	3.32245	-2.42154	3.32245	3.3219	3.32245	-8.22941	3.32135	3.32245	3.32245	3.3219	3.32135	-12.7423
	3.35329	-8.29614	3.35	-7.40714	3.35439	-2.46792	3.35439	3.35384	3.35439	-8.34455	3.35329	3.35439	3.35439	3.35384	3.35329	-12.8252
	3.38522	-8.30946	3.39	-7.49484	3.38634	-2.43497	3.38634	3.38578	3.38634	-8.4597	3.38522	3.38634	3.38634	3.38578	3.38522	-12.9148
	3.41716	-8.31611	3.42	-7.56467	3.41829	-2.42805	3.41829	3.41772	3.41829	-8.58162	3.41716	3.41829	3.41829	3.41772	3.41716	-13.0886
	3.4491	-8.39774	3.45	-7.68334	3.45023	-2.46873	3.45023	3.44967	3.45023	-8.66967	3.4491	3.45023	3.45023	3.44967	3.4491	-13.2133
	3.48103	-8.50658	3.48	-7.71072	3.48218	-2.50983	3.48218	3.48161	3.48218	-8.7374	3.48103	3.48218	3.48218	3.48161	3.48103	-13.2611
	3.51297	-8.52625	3.51	-7.8266	3.51413	-2.48867	3.51413	3.51355	3.51413	-8.81868	3.51297	3.51413	3.51413	3.51355	3.51297	-13.337
	3.5449	-8.56619	3.55	-7.96789	3.54607	-2.53505	3.54607	3.54549	3.54607	-8.94737	3.5449	3.54607	3.54607	3.54549	3.5449	-13.4338
	3.57684	-8.64058	3.58	-8.02265	3.57802	-2.54848	3.57802	3.57743	3.57802	-9.03542	3.57684	3.57802	3.57802	3.57743	3.57684	-13.558
	3.60878	-8.70107	3.61	-8.12821	3.60997	-2.57329	3.60997	3.60937	3.60997	-9.13024	3.60878	3.60997	3.60997	3.60937	3.60878	-13.6267
	3.64071	-8.71438	3.64	-8.2427	3.64191	-2.60625	3.64191	3.64131	3.64191	-9.1912	3.64071	3.64191	3.64191	3.64131	3.64071	-13.7798
	3.67265	-8.73406	3.67	-8.30638	3.67386	-2.61398	3.67386	3.67325	3.67386	-9.25216	3.67265	3.67386	3.67386	3.67325	3.67265	-13.8691
	3.70459	-8.80208	3.71	-8.34548	3.70581	-2.64693	3.70581	3.7052	3.70581	-9.33344	3.70459	3.70581	3.70581	3.7052	3.70459	-13.9239
	3.73652	-8.89095	3.74	-8.39211	3.73775	-2.70023	3.73775	3.73714	3.73775	-9.40794	3.73652	3.73775	3.73775	3.73714	3.73652	-14.0206
	3.76846	-8.92365	3.77	-8.42981	3.7697	-2.71325	3.7697	3.76908	3.7697	-9.50277	3.76846	3.7697	3.7697	3.76908	3.76846	-14.0891
	3.80039	-8.97112	3.8	-8.56495	3.80165	-2.72627	3.80165	3.80102	3.80165	-9.5705	3.80039	3.80165	3.80165	3.80102	3.80039	-14.1724
	3.83233	-9.05246	3.83	-8.67051	3.83359	-2.75353	3.83359	3.83296	3.83359	-9.63823	3.83233	3.83359	3.83359	3.83296	3.83233	-14.2839
	3.86427	-9.07184	3.87	-8.67863	3.86554	-2.76573	3.86554	3.8649	3.86554	-9.72628	3.86427	3.86554	3.86554	3.8649	3.86427	-14.3597
	3.8962	-9.09093	3.9	-8.76575	3.89749	-2.8056	3.89749	3.89684	3.89749	-9.79401	3.8962	3.89749	3.89749	3.89684	3.8962	-14.4217
	3.92814	-9.14419	3.93	-8.85901	3.92943	-2.83205	3.92943	3.92879	3.92943	-9.82111	3.92814	3.92943	3.92943	3.92879	3.92814	-14.5123
	3.96007	-9.22669	3.96	-8.88917	3.96138	-2.86541	3.96138	3.96073	3.96138	-9.86852	3.96007	3.96138	3.96138	3.96073	3.96007	-14.595
	3.99201	-9.2539	3.99	-8.93917	3.99333	-2.89185	3.99333	3.99267	3.99333	-9.97012	3.99201	3.99333	3.99333	3.99267	3.99201	-14.6986
	4.02395	-9.28747	4.03	-9.00286	4.02527	-2.91138	4.02527	4.02461	4.02527	-10.0446	4.02395	4.02527	4.02527	4.02461	4.02395	-14.7604
	4.05588	-9.31439	4.06	-9.05564	4.05722	-2.90406	4.05722	4.05655	4.05722	-10.0785	4.05588	4.05722	4.05722	4.05655	4.05588	-14.8293
	4.08782	-9.41628	4.09	-9.1235	4.08917	-2.93091	4.08917	4.08849	4.08917	-10.153	4.08782	4.08917	4.08917	4.08849	4.08782	-14.8918
	4.11975	-9.46346	4.12	-9.20644	4.12111	-2.95735	4.12111	4.12043	4.12111	-10.214	4.11975	4.12111	4.12111	4.12043	4.11975	-14.9264
	4.15169	-9.49067	4.15	-9.28938	4.15306	-2.97037	4.15306	4.15238	4.15306	-10.241	4.15169	4.15306	4.15306	4.15238	4.15169	-15.0092
	4.18363	-9.54508	4.19	-9.3243	4.18501	-3.01716	4.18501	4.18432	4.18501	-10.2952	4.18363	4.18501	4.18501	4.18432	4.18363	-15.0568
	4.21556	-9.57113	4.22	-9.37847	4.21695	-3.05011	4.21695	4.21626	4.21695	-10.3494	4.21556	4.21695	4.21695	4.21626	4.21556	-15.1331
	4.2475	-9.61106	4.25	-9.39076	4.2489	-3.01675	4.2489	4.2482	4.2489	-10.3901	4.2475	4.2489	4.2489	4.2482	4.2475	-15.2021
	4.27943	-9.65217	4.28	-9.42093	4.28085	-3.03628	4.28085	4.28014	4.28085	-10.4917	4.27943	4.28085	4.28085	4.28014	4.27943	-15.2783
	4.31137	-9.70022	4.31	-9.54574	4.31279	-3.04157	4.31279	4.31208	4.31279	-10.5594	4.31137	4.31279	4.31279	4.31208	4.31137	-15.3478
	4.34331	-9.74711	4.34	-9.5759	4.34474	-3.03465	4.34474	4.34402	4.34474	-10.5797	4.34331	4.34474	4.34474	4.34402	4.34331	-15.424
	4.37524	-9.8076	4.38	-9.57451	4.37669	-3.06924	4.37669	4.37596	4.37669	-10.6339	4.37524	4.37669	4.37669	4.37596	4.37524	-15.4787
	4.40718	-9.82874	4.41	-9.63622	4.40863	-3.13067	4.40863	4.40791	4.40863	-10.6474	4.40718	4.40863	4.40863	4.40791	4.40718	-15.5411
	4.43911	-9.84205	4.44	-9.69933	4.44058	-3.17746	4.44058	4.43985	4.44058	-10.6339	4.43911	4.44058	4.44058	4.43985	4.43911	-15.555
	4.47105	-9.85449	4.47	-9.78981	4.47253	-3.19658	4.47253	4.47179	4.47253	-10.6813	4.47105	4.47253	4.47253	4.47179	4.47105	-15.6236
	4.50299	-9.87446	4.5	-9.81579	4.50447	-3.16932	4.50447	4.50373	4.50447	-10.7219	4.50299	4.50447	4.50447	4.50373	4.50299	-15.7274
	4.53492	-9.90861	4.54	-9.82948	4.53642	-3.17624	4.53642	4.53567	4.53642	-10.7829	4.53492	4.53642	4.53642	4.53567	4.53492	-15.7899
	4.56686	-9.9092	4.57	-9.86579	4.56837	-3.20919	4.56837	4.56761	4.56837	-10.8168	4.56686	4.56837	4.56837	4.56761	4.56686	-15.8379
	4.5988	-9.94219	4.6	-9.97553	4.60031	-3.20187	4.60031	4.59955	4.60031	-10.8439	4.5988	4.60031	4.60031	4.59955	4.5988	-15.8997
	4.63073	-9.9882	4.63	-10.0283	4.63226	-3.22994	4.63226	4.6315	4.63226	-10.8913	4.63073	4.63226	4.63226	4.6315	4.63073	-15.9693
	4.66267	-10.036	4.66	-10.0468	4.66421	-3.2572	4.66421	4.66344	4.66421	-10.9455	4.66267	4.66421	4.66421	4.66344	4.66267	-16.0173
	4.6946	-10.0435	4.7	-10.0741	4.69615	-3.24377	4.69615	4.69538	4.69615	-10.9929	4.6946	4.69615	4.69615	4.69538	4.6946	-16.1355
	4.72654	-10.0293	4.73	-10.1612	4.7281	-3.18966	4.7281	4.72732	4.7281	-11.0606	4.72654	4.7281	4.7281	4.72732	4.72654	-16.2122
	4.75848	-10.0429	4.76	-10.2498	4.76005	-3.23645	4.76005	4.75926	4.76005	-11.1012	4.75848	4.76005	4.76005	4.75926	4.75848	-16.2252
	4.79041	-10.084	4.79	-10.3129	4.79199	-3.26289	4.79199	4.7912	4.79199	-11.1283	4.79041	4.79199	4.79199	4.7912	4.79041	-16.2804
	4.82235	-10.1376	4.82	-10.3629	4.82394	-3.25516	4.82394	4.82314	4.82394	-11.1622	4.82235	4.82394	4.82394	4.82314	4.82235	-16.3775
	4.85428	-10.1433	4.86	-10.3964	4.85589	-3.26249	4.85589	4.85508	4.85589	-11.169	4.85428	4.85589	4.85589	4.85508	4.85428	-16.4467
	4.88622	-10.143	4.89	-10.4416	4.88783	-3.26981	4.88783	4.88703	4.88783	-11.1961	4.88622	4.88783	4.88783	4.88703	4.88622	-16.5158
	4.91816	-10.1497	4.92	-10.4883	4.91978	-3.30317	4.91978	4.91897	4.91978	-11.2502	4.91816	4.91978	4.91978	4.91897	4.91816	-16.5641
	4.95009	-10.1561	4.95	-10.5335	4.95173	-3.33613	4.95173	4.95091	4.95173	-11.2841	4.95009	4.95173	4.95173	4.95091	4.95009	-16.6123
	4.98203	-10.1972	4.98	-10.5142	4.98367	-3.31578	4.98367	4.98285	4.98367	-11.3451	4.98203	4.98367	4.98367	4.98285	4.98203	-16.6672
	5.01396	-10.2238	5.02	-10.543	5.01562	-3.28934	5.01562	5.01479	5.01562	-11.3925	5.01396	5.01562	5.01562	5.01479	5.01396	-16.7366
	5.0459	-10.2713	5.05	-10.6391	5.04757	-3.32921	5.04757	5.04673	5.04757	-11.4399	5.0459	5.04757	5.04757	5.04673	5.0459	-16.7993
	5.07784	-10.2785	5.08	-10.7083	5.07951	-3.36135	5.07951	5.07867	5.07951	-11.4941	5.07784	5.07951	5.07951	5.07867	5.07784	-16.8823
	5.10977	-10.2855	5.11	-10.7658	5.11146	-3.36827	5.11146	5.11062	5.11146	-11.5009	5.10977	5.11146	5.11146	5.11062	5.10977	-16.9096
	5.14171	-10.2713	5.14	-10.8083	5.14341	-3.36216	5.14341	5.14256	5.14341	-11.5212	5.14171	5.14341	5.14341	5.14256	5.14171	-16.9369
	5.17364	-10.3248	5.18	-10.8666	5.17535	-3.39553	5.17535	5.1745	5.17535	-11.5686	5.17364	5.17535	5.17535	5.1745	5.17364	-17.0481
	5.20558	-10.3511	5.21	-10.9579	5.2073	-3.39064	5.2073	5.20644	5.2073	-11.6025	5.20558	5.2073	5.2073	5.20644	5.20558	-17.117
	5.23752	-10.3647	5.24	-11.0286	5.23924	-3.39186	5.23924	5.23838	5.23924	-11.6295	5.23752	5.23924	5.23924	5.23838	5.23752	-17.1305
	5.26945	-10.3653	5.27	-11.0587	5.27119	-3.45859	5.27119	5.27032	5.27119	-11.6837	5.26945	5.27119	5.27119	5.27032	5.26945	-17.1514
	5.30139	-10.3723	5.3	-11.1486	5.30314	-3.45737	5.30314	5.30226	5.30314	-11.7515	5.30139	5.30314	5.30314	5.30226	5.30139	-17.1925
	5.33333	-10.3584	5.34	-11.185	5.33508	-3.44353	5.33508	5.3342	5.33508	-11.7989	5.33333	5.33508	5.33508	5.3342	5.33333	-17.2688
	5.36526	-10.3578	5.37	-11.1732	5.36703	-3.4236	5.36703	5.36615	5.36703	-11.8192	5.36526	5.36703	5.36703	5.36615	5.36526	-17.31
	5.3972	-10.418	5.4	-11.1841	5.39898	-3.41628	5.39898	5.39809	5.39898	-11.826	5.3972	5.39898	5.39898	5.39809	5.3972	-17.3719
	5.42913	-10.438	5.43	-11.2355	5.43092	-3.46225	5.43092	5.43003	5.43092	-11.8395	5.42913	5.43092	5.43092	5.43003	5.42913	-17.4556
	5.46107	-10.4785	5.46	-11.3165	5.46287	-3.51636	5.46287	5.46197	5.46287	-11.8531	5.46107	5.46287	5.46287	5.46197	5.46107	-17.4835
	5.49301	-10.4993	5.49	-11.3302	5.49482	-3.50375	5.49482	5.49391	5.49482	-11.9276	5.49301	5.49482	5.49482	5.49391	5.49301	-17.4553
	5.52494	-10.5274	5.53	-11.3274	5.52676	-3.49724	5.52676	5.52585	5.52676	-11.9818	5.52494	5.52676	5.52676	5.52585	5.52494	-17.4475
	5.55688	-10.5335	5.56	-11.4173	5.55871	-3.52328	5.55871	5.55779	5.55871	-11.9682	5.55688	5.55871	5.55871	5.55779	5.55688	-17.5302
	5.58881	-10.5459	5.59	-11.4804	5.59066	-3.50863	5.59066	5.58974	5.59066	-11.9953	5.58881	5.59066	5.59066	5.58974	5.58881	-17.6208
	5.62075	-10.5659	5.62	-11.5016	5.6226	-3.50293	5.6226	5.62168	5.6226	-12.0427	5.62075	5.6226	5.6226	5.62168	5.62075	-17.6414
	5.65269	-10.559	5.65	-11.5497	5.65455	-3.52328	5.65455	5.65362	5.65455	-12.0901	5.65269	5.65455	5.65455	5.65362	5.65269	-17.6549
	5.68462	-10.5798	5.69	-11.562	5.6865	-3.54931	5.6865	5.68556	5.6865	-12.1037	5.68462	5.6865	5.6865	5.68556	5.68462	-17.6756
	5.71656	-10.6131	5.72	-11.5441	5.71844	-3.53589	5.71844	5.7175	5.71844	-12.1172	5.71656	5.71844	5.71844	5.7175	5.71656	-17.7032
	5.74849	-10.5986	5.75	-11.5893	5.75039	-3.53589	5.75039	5.74944	5.75039	-12.1849	5.74849	5.75039	5.75039	5.74944	5.74849	-17.7661
	5.78043	-10.6113	5.78	-11.6538	5.78234	-3.51066	5.78234	5.78138	5.78234	-12.1985	5.78043	5.78234	5.78234	5.78138	5.78043	-17.8565
	5.81237	-10.6388	5.81	-11.7259	5.81428	-3.54362	5.81428	5.81333	5.81428	-12.1985	5.81237	5.81428	5.81428	5.81333	5.81237	-17.8629
	5.8443	-10.666	5.85	-11.7499	5.84623	-3.5961	5.84623	5.84527	5.84623	-12.1714	5.8443	5.84623	5.84623	5.84527	5.8443	-17.9256
	5.87624	-10.6655	5.88	-11.7574	5.87818	-3.58227	5.87818	5.87721	5.87818	-12.1646	5.87624	5.87818	5.87818	5.87721	5.87624	-17.9736
	5.90817	-10.666	5.91	-11.7965	5.91012	-3.56233	5.91012	5.90915	5.91012	-12.2256	5.90817	5.91012	5.91012	5.90915	5.90817	-17.9382
	5.94011	-10.6793	5.94	-11.7985	5.94207	-3.62987	5.94207	5.94109	5.94207	-12.2527	5.94011	5.94207	5.94207	5.94109	5.94011	-17.9519
	5.97205	-10.6788	5.97	-11.8272	5.97402	-3.63556	5.97402	5.97303	5.97402	-12.2662	5.97205	5.97402	5.97402	5.97303	5.97205	-18.0076
	6.00398	-10.7193	6.01	-11.8616	6.00596	-3.64126	6.00596	6.00497	6.00596	-12.2798	6.00398	6.00596	6.00596	6.00497	6.00398	-18.1257
	6.03592	-10.7604	6.04	-11.935	6.03791	-3.63475	6.03791	6.03691	6.03791	-12.3001	6.03592	6.03791	6.03791	6.03691	6.03592	-18.1739
	6.06785	-10.7673	6.07	-11.9548	6.06986	-3.62905	6.06986	6.06886	6.06986	-12.3475	6.06785	6.06986	6.06986	6.06886	6.06785	-18.1949
	6.09979	-10.7607	6.1	-12.0076	6.1018	-3.66364	6.1018	6.1008	6.1018	-12.3881	6.09979	6.1018	6.1018	6.1008	6.09979	-18.23
	6.13173	-10.7879	6.13	-12.0495	6.13375	-3.65631	6.13375	6.13274	6.13375	-12.4288	6.13173	6.13375	6.13375	6.13274	6.13173	-18.2785
	6.16366	-10.794	6.17	-12.0598	6.1657	-3.65591	6.1657	6.16468	6.1657	-12.4559	6.16366	6.1657	6.1657	6.16468	6.16366	-18.3476
	6.1956	-10.7801	6.2	-12.0392	6.19764	-3.66242	6.19764	6.19662	6.19764	-12.4356	6.1956	6.19764	6.19764	6.19662	6.1956	-18.3681
	6.22754	-10.807	6.23	-12.011	6.22959	-3.68154	6.22959	6.22856	6.22959	-12.4897	6.22754	6.22959	6.22959	6.22856	6.22754	-18.4092
	6.25947	-10.8128	6.26	-12.1132	6.26154	-3.72751	6.26154	6.2605	6.26154	-12.5439	6.25947	6.26154	6.26154	6.2605	6.25947	-18.4156
	6.29141	-10.8397	6.29	-12.1584	6.29348	-3.73524	6.29348	6.29245	6.29348	-12.5642	6.29141	6.29348	6.29348	6.29245	6.29141	-18.4502
	6.32334	-10.9071	6.33	-12.2003	6.32543	-3.71612	6.32543	6.32439	6.32543	-12.5981	6.32334	6.32543	6.32543	6.32439	6.32334	-18.5335
	6.35528	-10.9068	6.36	-12.2573	6.35738	-3.73483	6.35738	6.35633	6.35738	-12.6117	6.35528	6.35738	6.35738	6.35633	6.35528	-18.5756
	6.38722	-10.9068	6.39	-12.295	6.38932	-3.74175	6.38932	6.38827	6.38932	-12.6184	6.38722	6.38932	6.38932	6.38827	6.38722	-18.5893
	6.41915	-10.9002	6.42	-12.3204	6.42127	-3.71571	6.42127	6.42021	6.42127	-12.6387	6.41915	6.42127	6.42127	6.42021	6.41915	-18.5955
	6.45109	-10.9271	6.45	-12.2964	6.45322	-3.72751	6.45322	6.45215	6.45322	-12.6591	6.45109	6.45322	6.45322	6.45215	6.45109	-18.6094
	6.48302	-10.9201	6.49	-12.3087	6.48516	-3.74826	6.48516	6.48409	6.48516	-12.6929	6.48302	6.48516	6.48516	6.48409	6.48302	-18.6306
	6.51496	-10.9271	6.52	-12.312	6.51711	-3.75558	6.51711	6.51603	6.51711	-12.6862	6.51496	6.51711	6.51711	6.51603	6.51496	-18.6378
	6.5469	-10.9604	6.55	-12.3477	6.54906	-3.72873	6.54906	6.54798	6.54906	-12.6862	6.5469	6.54906	6.54906	6.54798	6.5469	-18.6233
	6.57883	-11.0081	6.58	-12.4027	6.581	-3.74256	6.581	6.57992	6.581	-12.6929	6.57883	6.581	6.581	6.57992	6.57883	-18.6232
	6.61077	-11.0084	6.61	-12.3444	6.61295	-3.73606	6.61295	6.61186	6.61295	-12.6591	6.61077	6.61295	6.61295	6.61186	6.61077	-18.5955
	6.6427	-11.0356	6.64	-12.2483	6.6449	-3.73524	6.6449	6.6438	6.6449	-12.6455	6.6427	6.6449	6.6449	6.6438	6.6427	-18.5548
	6.67464	-11.0353	6.68	-12.2271	6.67684	-3.78162	6.67684	6.67574	6.67684	-12.6658	6.67464	6.67684	6.67684	6.67574	6.67464	-18.5413
	6.70658	-11.049	6.71	-12.2444	6.70879	-3.828	6.70879	6.70768	6.70879	-12.6252	6.70658	6.70879	6.70879	6.70768	6.70658	-18.4793
	6.73851	-11.049	6.74	-12.1902	6.74074	-3.80725	6.74074	6.73962	6.74074	-12.5778	6.73851	6.74074	6.74074	6.73962	6.73851	-18.4522
	6.77045	-11.0142	6.77	-12.1182	6.77268	-3.7743	6.77268	6.77157	6.77268	-12.5981	6.77045	6.77268	6.77268	6.77157	6.77045	-18.4587
	6.80238	-10.9864	6.8	-12.1436	6.80463	-3.7682	6.80463	6.80351	6.80463	-12.5981	6.80238	6.80463	6.80463	6.80351	6.80238	-18.4094
	6.83432	-10.9728	6.84	-12.1573	6.83658	-3.7682	6.83658	6.83545	6.83658	-12.5372	6.83432	6.83658	6.83658	6.83545	6.83432	-18.3599
	6.86626	-11.0064	6.87	-12.2279	6.86852	-3.74704	6.86852	6.86739	6.86852	-12.5033	6.86626	6.86852	6.86852	6.86739	6.86626	-18.2543
	6.89819	-11	6.9	-12.2553	6.90047	-3.77471	6.90047	6.89933	6.90047	-12.4897	6.89819	6.90047	6.90047	6.89933	6.89819	-17.8972
	6.93013	-11.0217	6.93	-12.2299	6.93242	-3.74094	6.93242	6.93127	6.93242	-12.3949	6.93013	6.93242	6.93242	6.93127	6.93013	-16.8901
	6.96207	-11.0154	6.96	-12.0646	6.96436	-3.73443	6.96436	6.96321	6.96436	-12.0766	6.96207	6.96436	6.96436	6.96321	6.96207	-14.5406
	6.994	-10.9335	7	-11.5578	6.99631	-3.80115	6.99631	6.99515	6.99631	-11.257	6.994	6.99631	6.99631	6.99515	6.994	-9.92545
	7.02594	-10.7366	7.03	-10.4702	7.02826	-3.77999	7.02826	7.0271	7.02826	-9.67887	7.02594	7.02826	7.02826	7.0271	7.02594	-1.85349
	7.05787	-10.3427	7.06	-8.37346	7.0602	-3.75436	7.0602	7.05904	7.0602	-6.94928	7.05787	7.0602	7.0602	7.05904	7.05787	11.8518
	7.08981	-9.69719	7.09	-4.82119	7.09215	-3.79464	7.09215	7.09098	7.09215	-2.4248	7.08981	7.09215	7.09215	7.09098	7.08981	31.8571
	7.12175	-8.5631	7.12	0.894477	7.1241	-3.79342	7.1241	7.12292	7.1241	4.59899	7.12175	7.1241	7.1241	7.12292	7.12175	60.8174
	7.15368	-6.70277	7.16	9.93644	7.15604	-3.72751	7.15604	7.15486	7.15604	15.6393	7.15368	7.15604	7.15604	7.15486	7.15368	100.319
	7.18562	-3.99836	7.19	23.5147	7.18799	-3.6079	7.18799	7.1868	7.18799	31.5224	7.18562	7.18799	7.18799	7.1868	7.18562	151.721
	7.21755	-0.113216	7.22	42.6646	7.21994	-3.46062	7.21994	7.21874	7.21994	52.4176	7.21755	7.21994	7.21994	7.21874	7.21755	219.419
	7.24949	4.81195	7.25	67.7815	7.25188	-3.24011	7.25188	7.25069	7.25188	79.6322	7.24949	7.25188	7.25188	7.25069	7.24949	301.224
	7.28143	11.326	7.28	101.248	7.28383	-2.77265	7.28383	7.28263	7.28383	114.399	7.28143	7.28383	7.28383	7.28263	7.28143	402.865
	7.31336	19.9595	7.32	146.146	7.31577	-1.94268	7.31577	7.31457	7.31577	159.21	7.31336	7.31577	7.31577	7.31457	7.31336	521.026
	7.3453	30.7874	7.35	201.272	7.34772	-0.67699	7.34772	7.34651	7.34772	212.678	7.3453	7.34772	7.34772	7.34651	7.3453	658.992
	7.37723	44.0026	7.38	267.317	7.37967	1.29539	7.37967	7.37845	7.37967	272.038	7.37723	7.37967	7.37967	7.37845	7.37723	821.444
	7.40917	59.6678	7.41	343.891	7.41161	4.01434	7.41161	7.41039	7.41161	339.519	7.40917	7.41161	7.41161	7.41039	7.40917	994.815
	7.44111	77.9875	7.44	430.621	7.44356	7.92289	7.44356	7.44233	7.44356	412.886	7.44111	7.44356	7.44356	7.44233	7.44111	1192.81
	7.47304	99.9	7.48	529.67	7.47551	13.1464	7.47551	7.47428	7.47551	495.431	7.47304	7.47551	7.47551	7.47428	7.47304	1401.73
	7.50498	124.417	7.51	632.21	7.50745	19.7226	7.50745	7.50622	7.50745	580.753	7.50498	7.50745	7.50745	7.50622	7.50498	1624.48
	7.53691	151.855	7.54	738.618	7.5394	28.1931	7.5394	7.53816	7.5394	664.374	7.53691	7.5394	7.5394	7.53816	7.53691	1857.72
	7.56885	180.557	7.57	845.857	7.57135	38.1376	7.57135	7.5701	7.57135	745.822	7.56885	7.57135	7.57135	7.5701	7.56885	2087.95
	7.60079	211.205	7.6	949.637	7.60329	50.1827	7.60329	7.60204	7.60329	825.339	7.60079	7.60329	7.60329	7.60204	7.60079	2321.48
	7.63272	243.75	7.64	1054.48	7.63524	64.0748	7.63524	7.63398	7.63524	903.108	7.63272	7.63524	7.63524	7.63398	7.63272	2552.51
	7.66466	276.621	7.67	1154.82	7.66719	79.7066	7.66719	7.66592	7.66719	972.344	7.66466	7.66719	7.66719	7.66592	7.66466	2772.96
	7.69659	309.422	7.7	1249.71	7.69913	97.2326	7.69913	7.69786	7.69913	1032.53	7.69659	7.69913	7.69913	7.69786	7.69659	2985.28
	7.72853	340.404	7.73	1336.17	7.73108	115.65	7.73108	7.72981	7.73108	1085.16	7.72853	7.73108	7.73108	7.72981	7.72853	3180.86
	7.76047	370.15	7.76	1415.02	7.76303	136.62	7.76303	7.76175	7.76303	1130.61	7.76047	7.76303	7.76303	7.76175	7.76047	3366
	7.7924	399.201	7.79	1489.48	7.79497	158.081	7.79497	7.79369	7.79497	1169.71	7.7924	7.79497	7.79497	7.79369	7.7924	3531.47
	7.82434	425.592	7.83	1555.21	7.82692	180.136	7.82692	7.82563	7.82692	1201.01	7.82434	7.82692	7.82692	7.82563	7.82434	3678.47
	7.85628	449.992	7.86	1610.93	7.85887	202.997	7.85887	7.85757	7.85887	1224.79	7.85628	7.85887	7.85887	7.85757	7.85628	3806.25
	7.88821	471.124	7.89	1655.53	7.89081	225.909	7.89081	7.88951	7.89081	1242.49	7.88821	7.89081	7.89081	7.88951	7.88821	3909.46
	7.92015	490.292	7.92	1692.28	7.92276	248.858	7.92276	7.92145	7.92276	1254.2	7.92015	7.92276	7.92276	7.92145	7.92015	3996.04
	7.95208	507.572	7.95	1721.27	7.95471	270.366	7.95471	7.9534	7.95471	1260.71	7.95208	7.95471	7.95471	7.9534	7.95208	4060.6
	7.98402	522.025	7.99	1740.88	7.98665	291.167	7.98665	7.98534	7.98665	1262.25	7.98402	7.98665	7.98665	7.98534	7.98402	4103.35
	8.01596	533.863	8.02	1752.12	8.0186	310.906	8.0186	8.01728	8.0186	1259.3	8.01596	8.0186	8.0186	8.01728	8.01596	4126.32
	8.04789	542.867	8.05	1755.85	8.05055	328.289	8.05055	8.04922	8.05055	1252.2	8.04789	8.05055	8.05055	8.04922	8.04789	4130.42
	8.07983	549.221	8.08	1753.01	8.08249	344.058	8.08249	8.08116	8.08249	1241.54	8.07983	8.08249	8.08249	8.08116	8.07983	4119.61
	8.11176	553.31	8.11	1743.55	8.11444	357.615	8.11444	8.1131	8.11444	1226.66	8.11176	8.11444	8.11444	8.1131	8.11176	4089.93
	8.1437	554.884	8.15	1729.17	8.14639	368.677	8.14639	8.14504	8.14639	1208.84	8.1437	8.14639	8.14639	8.14504	8.1437	4046.32
	8.17564	553.459	8.18	1709.78	8.17833	377.471	8.17833	8.17698	8.17833	1189.02	8.17564	8.17833	8.17833	8.17698	8.17564	3987.94
	8.20757	550.214	8.21	1686.2	8.21028	383.941	8.21028	8.20893	8.21028	1166.47	8.20757	8.21028	8.21028	8.20893	8.20757	3919.64
	8.23951	544.64	8.24	1659.02	8.24223	388.355	8.24223	8.24087	8.24223	1141.48	8.23951	8.24223	8.24223	8.24087	8.23951	3839.05
	8.27144	536.565	8.27	1626.91	8.27417	390.672	8.27417	8.27281	8.27417	1112.5	8.27144	8.27417	8.27417	8.27281	8.27144	3751.25
	8.30338	526.31	8.31	1592.09	8.30612	391.017	8.30612	8.30475	8.30612	1082.7	8.30338	8.30612	8.30612	8.30475	8.30338	3655.52
	8.33532	514.243	8.34	1553.93	8.33807	389.583	8.33807	8.33669	8.33807	1051.81	8.33532	8.33807	8.33807	8.33669	8.33532	3551.81
	8.36725	500.886	8.37	1514.6	8.37001	386.252	8.37001	8.36863	8.37001	1019.36	8.36725	8.37001	8.37001	8.36863	8.36725	3446.62
	8.39919	485.914	8.4	1471.91	8.40196	381.382	8.40196	8.40057	8.40196	985.829	8.39919	8.40196	8.40196	8.40057	8.39919	3332.65
	8.43112	469.722	8.43	1425.51	8.43391	375.123	8.43391	8.43252	8.43391	949.62	8.43112	8.43391	8.43391	8.43252	8.43112	3220.05
	8.46306	452.568	8.47	1378.08	8.46585	367.621	8.46585	8.46446	8.46585	914.243	8.46306	8.46585	8.46585	8.46446	8.46306	3103.53
	8.495	434.925	8.5	1329.66	8.4978	359.032	8.4978	8.4964	8.4978	879.436	8.495	8.4978	8.4978	8.4964	8.495	2985.13
	8.52693	417.609	8.53	1281.08	8.52975	349.967	8.52975	8.52834	8.52975	844.974	8.52693	8.52975	8.52975	8.52834	8.52693	2869.36
	8.55887	400.352	8.56	1231.49	8.56169	340.125	8.56169	8.56028	8.56169	811.223	8.55887	8.56169	8.56169	8.56028	8.55887	2747.82
	8.59081	382.784	8.59	1179.84	8.59364	330.132	8.59364	8.59222	8.59364	775.949	8.59081	8.59364	8.59364	8.59222	8.59081	2633.12
	8.62274	365.861	8.63	1130.13	8.62559	319.534	8.62559	8.62416	8.62559	743.106	8.62274	8.62559	8.62559	8.62416	8.62274	2517.85
	8.65468	349.185	8.66	1081.34	8.65753	308.731	8.65753	8.65611	8.65753	712.477	8.65468	8.65753	8.65753	8.65611	8.65468	2404.41
	8.68661	333.762	8.69	1034.14	8.68948	298.451	8.68948	8.68805	8.68948	683.122	8.68661	8.68948	8.68948	8.68805	8.68661	2294.32
	8.71855	318.696	8.72	988.891	8.72143	287.863	8.72143	8.71999	8.72143	654.865	8.71855	8.72143	8.72143	8.71999	8.71855	2186.42
	8.75049	303.974	8.75	945.068	8.75337	277.838	8.75337	8.75193	8.75337	627.122	8.75049	8.75337	8.75337	8.75193	8.75049	2084.96
	8.78242	290.195	8.79	904.463	8.78532	267.823	8.78532	8.78387	8.78532	601.925	8.78242	8.78532	8.78532	8.78387	8.78242	1987.64
	8.81436	277.18	8.82	866.846	8.81727	258.351	8.81727	8.81581	8.81727	578.992	8.81436	8.81727	8.81727	8.81581	8.81436	1896.11
	8.84629	265.244	8.85	833.219	8.84921	249.366	8.84921	8.84775	8.84921	557.683	8.84629	8.84921	8.84921	8.84775	8.84629	1810.54
	8.87823	253.963	8.88	802.48	8.88116	240.591	8.88116	8.87969	8.88116	538.095	8.87823	8.88116	8.88116	8.87969	8.87823	1730.4
	8.91017	243.217	8.91	773.968	8.91311	232.482	8.91311	8.91164	8.91311	519.15	8.91017	8.91311	8.91311	8.91164	8.91017	1658.49
	8.9421	233.202	8.95	749.004	8.94505	224.667	8.94505	8.94358	8.94505	503.145	8.9421	8.94505	8.94505	8.94358	8.9421	1590.91
	8.97404	224.084	8.98	726.953	8.977	217.483	8.977	8.97552	8.977	488.888	8.97404	8.977	8.977	8.97552	8.97404	1529.85
	9.00597	215.895	9.01	708.023	9.00895	210.905	9.00895	9.00746	9.00895	476.236	9.00597	9.00895	9.00895	9.00746	9.00597	1474.97
	9.03791	208.313	9.04	691.104	9.04089	204.638	9.04089	9.0394	9.04089	465.012	9.03791	9.04089	9.04089	9.0394	9.03791	1423.79
	9.06985	201.277	9.07	676.316	9.07284	198.969	9.07284	9.07134	9.07284	454.629	9.06985	9.07284	9.07284	9.07134	9.06985	1379.35
	9.10178	194.87	9.1	663.554	9.10479	193.661	9.10479	9.10328	9.10479	445.993	9.10178	9.10479	9.10479	9.10328	9.10178	1338.7
	9.13372	189.2	9.14	652.883	9.13673	188.664	9.13673	9.13523	9.13673	438.597	9.13372	9.13673	9.13673	9.13523	9.13372	1301.73
	9.16565	184.168	9.17	644.029	9.16868	184.179	9.16868	9.16717	9.16868	432.278	9.16565	9.16868	9.16868	9.16717	9.16565	1269.26
	9.19759	179.592	9.2	636.692	9.20063	179.919	9.20063	9.19911	9.20063	426.737	9.19759	9.20063	9.20063	9.19911	9.19759	1239.25
	9.22953	175.358	9.23	630.733	9.23257	176.08	9.23257	9.23105	9.23257	421.861	9.22953	9.23257	9.23257	9.23105	9.22953	1213.67
	9.26146	171.682	9.26	626.536	9.26452	172.379	9.26452	9.26299	9.26452	418.02	9.26146	9.26452	9.26452	9.26299	9.26146	1190.19
	9.2934	168.465	9.3	623.664	9.29647	168.936	9.29647	9.29493	9.29647	415.06	9.2934	9.29647	9.29647	9.29493	9.2934	1169.74
	9.32533	165.704	9.33	621.937	9.32841	165.746	9.32841	9.32687	9.32841	412.737	9.32533	9.32841	9.32841	9.32687	9.32533	1151.59
	9.35727	163.214	9.36	621.345	9.36036	162.633	9.36036	9.35881	9.36036	411.261	9.35727	9.36036	9.36036	9.35881	9.35727	1135.42
	9.38921	161.08	9.39	622.025	9.3923	159.91	9.3923	9.39076	9.3923	410.475	9.38921	9.3923	9.3923	9.39076	9.38921	1121.65
	9.42114	159.276	9.42	624.237	9.42425	157.199	9.42425	9.4227	9.42425	410.516	9.42114	9.42425	9.42425	9.4227	9.42114	1109.52
	9.45308	157.78	9.46	627.667	9.4562	154.647	9.4562	9.45464	9.4562	411.552	9.45308	9.4562	9.4562	9.45464	9.45308	1099.67
	9.48502	156.656	9.49	632.365	9.48814	152.214	9.48814	9.48658	9.48814	413.53	9.48502	9.48814	9.48814	9.48658	9.48502	1091.67
	9.51695	155.881	9.52	638.467	9.52009	149.91	9.52009	9.51852	9.52009	416.747	9.51695	9.52009	9.52009	9.51852	9.51695	1085.46
	9.54889	155.411	9.55	646.373	9.55204	147.846	9.55204	9.55046	9.55204	421.508	9.54889	9.55204	9.55204	9.55046	9.54889	1081.5
	9.58082	155.343	9.58	656.345	9.58398	145.905	9.58398	9.5824	9.58398	427.665	9.58082	9.58398	9.58398	9.5824	9.58082	1079.86
	9.61276	155.744	9.62	668.127	9.61593	144.099	9.61593	9.61435	9.61593	435.454	9.61276	9.61593	9.61593	9.61435	9.61276	1080.74
	9.6447	156.601	9.65	681.862	9.64788	142.514	9.64788	9.64629	9.64788	445.424	9.6447	9.64788	9.64788	9.64629	9.6447	1084
	9.67663	158.075	9.68	697.965	9.67982	141.049	9.67982	9.67823	9.67982	457.609	9.67663	9.67982	9.67982	9.67823	9.67663	1090.25
	9.70857	160.139	9.71	716.77	9.71177	139.812	9.71177	9.71017	9.71177	473.066	9.70857	9.71177	9.71177	9.71017	9.70857	1099.15
	9.7405	162.836	9.74	737.794	9.74372	138.789	9.74372	9.74211	9.74372	490.425	9.7405	9.74372	9.74372	9.74211	9.7405	1111.03
	9.77244	166.142	9.78	760.815	9.77566	137.935	9.77566	9.77405	9.77566	510.447	9.77244	9.77566	9.77566	9.77405	9.77244	1125.73
	9.80438	170	9.81	785.758	9.80761	137.33	9.80761	9.80599	9.80761	532.873	9.80438	9.80761	9.80761	9.80599	9.80438	1142.9
	9.83631	174.546	9.84	812.436	9.83956	136.79	9.83956	9.83793	9.83956	558.638	9.83631	9.83956	9.83956	9.83793	9.83631	1162.29
	9.86825	179.639	9.87	840.85	9.8715	136.532	9.8715	9.86988	9.8715	588	9.86825	9.8715	9.8715	9.86988	9.86825	1183.35
	9.90018	185.247	9.9	869.802	9.90345	136.369	9.90345	9.90182	9.90345	617.687	9.90018	9.90345	9.90345	9.90182	9.90018	1206.59
	9.93212	191.033	9.94	898.941	9.9354	136.3	9.9354	9.93376	9.9354	648.891	9.93212	9.9354	9.9354	9.93376	9.93212	1230.2
	9.96406	197.045	9.97	927.45	9.96734	136.284	9.96734	9.9657	9.96734	680.731	9.96406	9.96734	9.96734	9.9657	9.96406	1254.8
	9.99599	203.16	10	955.383	9.99929	136.304	9.99929	9.99764	9.99929	714.435	9.99599	9.99929	9.99929	9.99764	9.99599	1278.98
	10.0279	209.31	10.03	982.092	10.0312	136.36	10.0312	10.0296	10.0312	748.558	10.0279	10.0312	10.0312	10.0296	10.0279	1302.26
	10.0599	215.25	10.06	1006.28	10.0632	136.317	10.0632	10.0615	10.0632	779.539	10.0599	10.0632	10.0632	10.0615	10.0599	1324.53
	10.0918	220.722	10.1	1028.02	10.0951	136.195	10.0951	10.0935	10.0951	809.124	10.0918	10.0951	10.0951	10.0935	10.0918	1344.47
	10.1237	225.525	10.13	1046.11	10.1271	136.045	10.1271	10.1254	10.1271	836.731	10.1237	10.1271	10.1271	10.1254	10.1237	1361.66
	10.1557	229.853	10.16	1061.89	10.159	135.739	10.159	10.1573	10.159	861.785	10.1557	10.159	10.159	10.1573	10.1557	1375.97
	10.1876	233.352	10.19	1074.19	10.191	135.252	10.191	10.1893	10.191	883.873	10.1876	10.191	10.191	10.1893	10.1876	1386.83
	10.2195	235.982	10.22	1082.72	10.2229	134.767	10.2229	10.2212	10.2229	901.713	10.2195	10.2229	10.2229	10.2212	10.2195	1393.87
	10.2515	237.71	10.25	1087.88	10.2549	134.073	10.2549	10.2532	10.2549	915.517	10.2515	10.2549	10.2549	10.2532	10.2515	1397.42
	10.2834	238.631	10.29	1089.91	10.2868	133.284	10.2868	10.2851	10.2868	925.975	10.2834	10.2868	10.2868	10.2851	10.2834	1396.8
	10.3154	238.651	10.32	1088.51	10.3188	132.258	10.3188	10.3171	10.3188	932.971	10.3154	10.3188	10.3188	10.3171	10.3154	1393.43
	10.3473	237.727	10.35	1084.25	10.3507	131.161	10.3507	10.349	10.3507	936.798	10.3473	10.3507	10.3507	10.349	10.3473	1386.49
	10.3792	236.307	10.38	1077.94	10.3826	129.977	10.3826	10.3809	10.3826	936.73	10.3792	10.3826	10.3826	10.3809	10.3792	1376.69
	10.4112	234.283	10.41	1069.25	10.4146	128.686	10.4146	10.4129	10.4146	934.069	10.4112	10.4146	10.4146	10.4129	10.4112	1364.51
	10.4431	231.801	10.45	1058.66	10.4465	127.405	10.4465	10.4448	10.4465	928.995	10.4431	10.4465	10.4465	10.4448	10.4431	1349.59
	10.475	228.816	10.48	1046.02	10.4785	125.97	10.4785	10.4768	10.4785	921.057	10.475	10.4785	10.4785	10.4768	10.475	1333.04
	10.507	225.487	10.51	1032.06	10.5104	124.538	10.5104	10.5087	10.5104	910.491	10.507	10.5104	10.5104	10.5087	10.507	1314.91
	10.5389	222.026	10.54	1016.72	10.5424	123.077	10.5424	10.5406	10.5424	898.618	10.5389	10.5424	10.5424	10.5406	10.5389	1295.29
	10.5708	218.605	10.57	1000.37	10.5743	121.668	10.5743	10.5726	10.5743	885.532	10.5708	10.5743	10.5743	10.5726	10.5708	1274.56
	10.6028	215.126	10.61	983.81	10.6063	120.181	10.6063	10.6045	10.6063	870.787	10.6028	10.6063	10.6063	10.6045	10.6028	1253.5
	10.6347	211.583	10.64	965.969	10.6382	118.72	10.6382	10.6365	10.6382	854.707	10.6347	10.6382	10.6382	10.6365	10.6347	1231.8
	10.6667	208.312	10.67	947.794	10.6702	117.351	10.6702	10.6684	10.6702	836.772	10.6667	10.6702	10.6702	10.6684	10.6667	1211.17
	10.6986	205.071	10.7	929.585	10.7021	115.919	10.7021	10.7004	10.7021	819.514	10.6986	10.7021	10.7021	10.7004	10.6986	1189.92
	10.7305	202.099	10.73	912.038	10.7341	114.591	10.7341	10.7323	10.7341	801.687	10.7305	10.7341	10.7341	10.7323	10.7305	1170.37
	10.7625	199.336	10.77	895.069	10.766	113.344	10.766	10.7642	10.766	783.765	10.7625	10.766	10.766	10.7642	10.7625	1151.84
	10.7944	196.69	10.8	878.438	10.798	112.075	10.798	10.7962	10.798	765.322	10.7944	10.798	10.798	10.7962	10.7944	1134.74
	10.8263	194.268	10.83	862.744	10.8299	110.848	10.8299	10.8281	10.8299	747.102	10.8263	10.8299	10.8299	10.8281	10.8263	1119.85
	10.8583	192.057	10.86	848.28	10.8618	109.749	10.8618	10.8601	10.8618	730.358	10.8583	10.8618	10.8618	10.8601	10.8583	1106.14
	10.8902	190.149	10.89	835.551	10.8938	108.723	10.8938	10.892	10.8938	714.272	10.8902	10.8938	10.8938	10.892	10.8902	1094.29
	10.9221	188.449	10.93	824.2	10.9257	107.798	10.9257	10.9239	10.9257	699.507	10.9221	10.9257	10.9257	10.9239	10.9221	1083.62
	10.9541	186.865	10.96	814.019	10.9577	106.898	10.9577	10.9559	10.9577	684.965	10.9541	10.9577	10.9577	10.9559	10.9541	1074.62
	10.986	185.499	10.99	805.564	10.9896	106.107	10.9896	10.9878	10.9896	671.561	10.986	10.9896	10.9896	10.9878	10.986	1066.66
	11.0179	184.437	11.02	798.839	11.0216	105.368	11.0216	11.0198	11.0216	659.775	11.0179	11.0216	11.0216	11.0198	11.0179	1059.57
	11.0499	183.545	11.05	793.563	11.0535	104.712	11.0535	11.0517	11.0535	649.392	11.0499	11.0535	11.0535	11.0517	11.0499	1053.35
	11.0818	182.864	11.09	789.467	11.0855	104.112	11.0855	11.0836	11.0855	639.943	11.0818	11.0855	11.0855	11.0836	11.0818	1048.11
	11.1138	182.313	11.12	786.197	11.1174	103.669	11.1174	11.1156	11.1174	631.416	11.1138	11.1174	11.1174	11.1156	11.1138	1043.38
	11.1457	181.986	11.15	783.99	11.1494	103.298	11.1494	11.1475	11.1494	623.877	11.1457	11.1494	11.1494	11.1475	11.1457	1039.1
	11.1776	181.89	11.18	782.809	11.1813	102.935	11.1813	11.1795	11.1813	617.748	11.1776	11.1813	11.1813	11.1795	11.1776	1035.02
	11.2096	182.008	11.21	782.121	11.2133	102.692	11.2133	11.2114	11.2133	612.634	11.2096	11.2133	11.2133	11.2114	11.2096	1030.77
	11.2415	182.339	11.25	781.767	11.2452	102.589	11.2452	11.2434	11.2452	608.258	11.2415	11.2452	11.2452	11.2434	11.2415	1026.44
	11.2734	182.868	11.28	781.801	11.2772	102.62	11.2772	11.2753	11.2772	604.547	11.2734	11.2772	11.2772	11.2753	11.2734	1021.72
	11.3054	183.555	11.31	782.087	11.3091	102.638	11.3091	11.3072	11.3091	601.438	11.3054	11.3091	11.3091	11.3072	11.3054	1016.89
	11.3373	184.426	11.34	782.571	11.341	102.797	11.341	11.3392	11.341	599.135	11.3373	11.341	11.341	11.3392	11.3373	1011.23
	11.3692	185.479	11.37	783.056	11.373	103.055	11.373	11.3711	11.373	597.001	11.3692	11.373	11.373	11.3711	11.3692	1005.64
	11.4012	186.62	11.4	783.424	11.4049	103.415	11.4049	11.4031	11.4049	595.281	11.4012	11.4049	11.4049	11.4031	11.4012	999.609
	11.4331	188.128	11.44	783.668	11.4369	103.935	11.4369	11.435	11.4369	593.757	11.4331	11.4369	11.4369	11.435	11.4331	993.643
	11.4651	189.692	11.47	783.889	11.4688	104.556	11.4688	11.4669	11.4688	592.511	11.4651	11.4688	11.4688	11.4669	11.4651	987.55
	11.497	191.402	11.5	784.198	11.5008	105.317	11.5008	11.4989	11.5008	591.325	11.497	11.5008	11.5008	11.4989	11.497	981.574
	11.5289	193.222	11.53	784.374	11.5327	106.185	11.5327	11.5308	11.5327	590.282	11.5289	11.5327	11.5327	11.5308	11.5289	976.094
	11.5609	195.213	11.56	784.786	11.5647	107.187	11.5647	11.5628	11.5647	589.524	11.5609	11.5647	11.5647	11.5628	11.5609	970.66
	11.5928	197.345	11.6	785.429	11.5966	108.304	11.5966	11.5947	11.5966	588.853	11.5928	11.5966	11.5966	11.5947	11.5928	965.932
	11.6247	199.468	11.63	786.568	11.6286	109.58	11.6286	11.6267	11.6286	588.332	11.6247	11.6286	11.6286	11.6267	11.6247	961.622
	11.6567	201.828	11.66	788.276	11.6605	110.916	11.6605	11.6586	11.6605	588.156	11.6567	11.6605	11.6605	11.6586	11.6567	957.928
	11.6886	204.214	11.69	790.407	11.6925	112.375	11.6925	11.6905	11.6925	588.664	11.6886	11.6925	11.6925	11.6905	11.6886	954.471
	11.7205	206.605	11.72	793.364	11.7244	114.015	11.7244	11.7225	11.7244	589.415	11.7205	11.7244	11.7244	11.7225	11.7205	951.66
	11.7525	209.166	11.76	797.064	11.7564	115.682	11.7564	11.7544	11.7564	591	11.7525	11.7564	11.7564	11.7544	11.7525	949.339
	11.7844	211.768	11.79	801.332	11.7883	117.382	11.7883	11.7864	11.7883	593.161	11.7844	11.7883	11.7883	11.7864	11.7844	947.711
	11.8163	214.303	11.82	806.614	11.8202	119.241	11.8202	11.8183	11.8202	595.985	11.8163	11.8202	11.8202	11.8183	11.8163	946.481
	11.8483	216.887	11.85	812.428	11.8522	121.103	11.8522	11.8502	11.8522	599.65	11.8483	11.8522	11.8522	11.8502	11.8483	945.868
	11.8802	219.427	11.88	818.787	11.8841	122.967	11.8841	11.8822	11.8841	604.228	11.8802	11.8841	11.8841	11.8822	11.8802	945.759
	11.9122	222.07	11.92	826.168	11.9161	124.903	11.9161	11.9141	11.9161	609.952	11.9122	11.9161	11.9161	11.9141	11.9122	946.201
	11.9441	224.583	11.95	834.064	11.948	126.79	11.948	11.9461	11.948	616.576	11.9441	11.948	11.948	11.9461	11.9441	947.279
	11.976	227.085	11.98	842.753	11.98	128.757	11.98	11.978	11.98	623.959	11.976	11.98	11.98	11.978	11.976	948.875
	12.008	229.414	12.01	851.486	12.0119	130.684	12.0119	12.0099	12.0119	632.053	12.008	12.0119	12.0119	12.0099	12.008	951.112
	12.0399	231.773	12.04	860.922	12.0439	132.743	12.0439	12.0419	12.0439	641.244	12.0399	12.0439	12.0439	12.0419	12.0399	953.97
	12.0718	234.114	12.08	871.339	12.0758	134.605	12.0758	12.0738	12.0758	651.607	12.0718	12.0758	12.0758	12.0738	12.0718	957.663
	12.1038	236.286	12.11	881.819	12.1078	136.559	12.1078	12.1058	12.1078	662.674	12.1038	12.1078	12.1078	12.1058	12.1038	961.972
	12.1357	238.57	12.14	893.005	12.1397	138.579	12.1397	12.1377	12.1397	673.748	12.1357	12.1397	12.1397	12.1377	12.1357	967.408
	12.1676	240.648	12.17	904.391	12.1717	140.464	12.1717	12.1697	12.1717	685.784	12.1676	12.1717	12.1717	12.1697	12.1676	973.084
	12.1996	242.707	12.2	916.377	12.2036	142.387	12.2036	12.2016	12.2036	698.233	12.1996	12.2036	12.2036	12.2016	12.1996	979.942
	12.2315	244.912	12.24	929.018	12.2356	144.317	12.2356	12.2335	12.2356	711.746	12.2315	12.2356	12.2356	12.2335	12.2315	987.089
	12.2635	247.116	12.27	941.807	12.2675	146.192	12.2675	12.2655	12.2675	724.947	12.2635	12.2675	12.2675	12.2655	12.2635	994.797
	12.2954	249.337	12.3	955.17	12.2994	148.006	12.2994	12.2974	12.2994	738.093	12.2954	12.2994	12.2994	12.2974	12.2954	1003.03
	12.3273	251.547	12.33	968.488	12.3314	149.835	12.3314	12.3294	12.3314	751.118	12.3273	12.3314	12.3314	12.3294	12.3273	1011.29
	12.3593	253.759	12.36	981.647	12.3633	151.586	12.3633	12.3613	12.3633	763.974	12.3593	12.3633	12.3633	12.3613	12.3593	1019.91
	12.3912	256.104	12.4	995.1	12.3953	153.316	12.3953	12.3932	12.3953	777.507	12.3912	12.3953	12.3953	12.3932	12.3912	1028.08
	12.4231	258.544	12.43	1007.94	12.4272	154.971	12.4272	12.4252	12.4272	789.807	12.4231	12.4272	12.4272	12.4252	12.4231	1036.14
	12.4551	260.998	12.46	1020.55	12.4592	156.668	12.4592	12.4571	12.4592	800.718	12.4551	12.4592	12.4592	12.4571	12.4551	1043.64
	12.487	263.507	12.49	1032.1	12.4911	158.294	12.4911	12.4891	12.4911	810.797	12.487	12.4911	12.4911	12.4891	12.487	1050.74
	12.5189	266.125	12.52	1042.93	12.5231	159.924	12.5231	12.521	12.5231	820.476	12.5189	12.5231	12.5231	12.521	12.5189	1057.14
	12.5509	268.897	12.56	1053.41	12.555	161.567	12.555	12.5529	12.555	829.078	12.5509	12.555	12.555	12.5529	12.5509	1062.88
	12.5828	271.509	12.59	1062.74	12.587	163.238	12.587	12.5849	12.587	836.352	12.5828	12.587	12.587	12.5849	12.5828	1067.95
	12.6148	274.22	12.62	1071.67	12.6189	165.007	12.6189	12.6168	12.6189	842.373	12.6148	12.6189	12.6189	12.6168	12.6148	1072.56
	12.6467	276.973	12.65	1079.41	12.6509	166.712	12.6509	12.6488	12.6509	847.115	12.6467	12.6509	12.6509	12.6488	12.6467	1076.56
	12.6786	279.749	12.68	1087.04	12.6828	168.55	12.6828	12.6807	12.6828	850.847	12.6786	12.6828	12.6828	12.6807	12.6786	1080.09
	12.7106	282.526	12.71	1094.59	12.7148	170.415	12.7148	12.7127	12.7148	853.996	12.7106	12.7148	12.7148	12.7127	12.7106	1083.35
	12.7425	285.215	12.75	1101.98	12.7467	172.388	12.7467	12.7446	12.7467	856.109	12.7425	12.7467	12.7467	12.7446	12.7425	1086.22
	12.7744	287.95	12.78	1109.57	12.7786	174.361	12.7786	12.7765	12.7786	857.647	12.7744	12.7786	12.7786	12.7765	12.7744	1089.28
	12.8064	290.476	12.81	1117.34	12.8106	176.361	12.8106	12.8085	12.8106	858.981	12.8064	12.8106	12.8106	12.8085	12.8064	1091.82
	12.8383	293.013	12.84	1125.5	12.8425	178.357	12.8425	12.8404	12.8425	859.767	12.8383	12.8425	12.8425	12.8404	12.8383	1094.72
	12.8702	295.347	12.87	1134.41	12.8745	180.259	12.8745	12.8724	12.8745	861.243	12.8702	12.8745	12.8745	12.8724	12.8702	1097.17
	12.9022	297.568	12.91	1143.77	12.9064	182.195	12.9064	12.9043	12.9064	862.7	12.9022	12.9064	12.9064	12.9043	12.9022	1099.78
	12.9341	299.685	12.94	1153.89	12.9384	184.03	12.9384	12.9362	12.9384	864.305	12.9341	12.9384	12.9384	12.9362	12.9341	1102.22
	12.966	301.537	12.97	1164.15	12.9703	185.716	12.9703	12.9682	12.9703	866.215	12.966	12.9703	12.9703	12.9682	12.966	1104.43
	12.998	303.176	13	1174.77	13.0023	187.291	13.0023	13.0001	13.0023	868.416	12.998	13.0023	13.0023	13.0001	12.998	1106.39
	13.0299	304.56	13.03	1186.02	13.0342	188.671	13.0342	13.0321	13.0342	871.166	13.0299	13.0342	13.0342	13.0321	13.0299	1107.76
	13.0619	305.438	13.07	1197.36	13.0662	189.783	13.0662	13.064	13.0662	874.072	13.0619	13.0662	13.0662	13.064	13.0619	1108.63
	13.0938	306.19	13.1	1208.72	13.0981	190.806	13.0981	13.096	13.0981	876.957	13.0938	13.0981	13.0981	13.096	13.0938	1108.6
	13.1257	306.709	13.13	1219.26	13.1301	191.509	13.1301	13.1279	13.1301	879.876	13.1257	13.1301	13.1301	13.1279	13.1257	1107.84
	13.1577	306.774	13.16	1229.77	13.162	192.032	13.162	13.1598	13.162	883.405	13.1577	13.162	13.162	13.1598	13.1577	1105.53
	13.1896	306.56	13.19	1239.8	13.194	192.276	13.194	13.1918	13.194	886.751	13.1896	13.194	13.194	13.1918	13.1896	1102.58
	13.2215	306.044	13.23	1249.3	13.2259	192.341	13.2259	13.2237	13.2259	890.165	13.2215	13.2259	13.2259	13.2237	13.2215	1098.33
	13.2535	305.262	13.26	1258.25	13.2578	192.19	13.2578	13.2557	13.2578	893.369	13.2535	13.2578	13.2578	13.2557	13.2535	1093.22
	13.2854	304.086	13.29	1266.6	13.2898	191.836	13.2898	13.2876	13.2898	896.538	13.2854	13.2898	13.2898	13.2876	13.2854	1087.04
	13.3173	302.704	13.32	1275.17	13.3217	191.402	13.3217	13.3195	13.3217	899.641	13.3173	13.3217	13.3217	13.3195	13.3173	1080.01
	13.3493	301.133	13.35	1284	13.3537	190.755	13.3537	13.3515	13.3537	902.885	13.3493	13.3537	13.3537	13.3515	13.3493	1072.9
	13.3812	299.435	13.39	1292.97	13.3856	190.001	13.3856	13.3834	13.3856	906.278	13.3812	13.3856	13.3856	13.3834	13.3812	1065.25
	13.4132	297.633	13.42	1302.74	13.4176	189.126	13.4176	13.4154	13.4176	909.746	13.4132	13.4176	13.4176	13.4154	13.4132	1057.71
	13.4451	295.745	13.45	1313.78	13.4495	188.21	13.4495	13.4473	13.4495	913.681	13.4451	13.4495	13.4495	13.4473	13.4451	1050.35
	13.477	293.738	13.48	1326.12	13.4815	187.251	13.4815	13.4792	13.4815	918.145	13.477	13.4815	13.4815	13.4792	13.477	1043.79
	13.509	291.789	13.51	1340.61	13.5134	186.368	13.5134	13.5112	13.5134	923.787	13.509	13.5134	13.5134	13.5112	13.509	1037.96
	13.5409	289.911	13.55	1356.47	13.5454	185.336	13.5454	13.5431	13.5454	929.984	13.5409	13.5454	13.5454	13.5431	13.5409	1033.3
	13.5728	288.075	13.58	1374.2	13.5773	184.319	13.5773	13.5751	13.5773	937.57	13.5728	13.5773	13.5773	13.5751	13.5728	1029.83
	13.6048	286.492	13.61	1392.87	13.6093	183.402	13.6093	13.607	13.6093	946.301	13.6048	13.6093	13.6093	13.607	13.6048	1027.79
	13.6367	284.901	13.64	1413.13	13.6412	182.498	13.6412	13.639	13.6412	956.515	13.6367	13.6412	13.6412	13.639	13.6367	1026.92
	13.6686	283.469	13.67	1435.29	13.6732	181.681	13.6732	13.6709	13.6732	968.842	13.6686	13.6732	13.6732	13.6709	13.6686	1027.21
	13.7006	282.284	13.71	1457.63	13.7051	180.925	13.7051	13.7028	13.7051	982.131	13.7006	13.7051	13.7051	13.7028	13.7006	1028.67
	13.7325	281.264	13.74	1480.15	13.737	180.197	13.737	13.7348	13.737	996.836	13.7325	13.737	13.737	13.7348	13.7325	1031.03
	13.7644	280.455	13.77	1501.94	13.769	179.506	13.769	13.7667	13.769	1012.41	13.7644	13.769	13.769	13.7667	13.7644	1034.15
	13.7964	279.769	13.8	1524.31	13.8009	178.943	13.8009	13.7987	13.8009	1028.83	13.7964	13.8009	13.8009	13.7987	13.7964	1037.86
	13.8283	279.279	13.83	1546.73	13.8329	178.395	13.8329	13.8306	13.8329	1046.66	13.8283	13.8329	13.8329	13.8306	13.8283	1042.16
	13.8603	279.014	13.86	1566.92	13.8648	177.962	13.8648	13.8625	13.8648	1064.37	13.8603	13.8648	13.8648	13.8625	13.8603	1046.46
	13.8922	278.986	13.9	1585.49	13.8968	177.602	13.8968	13.8945	13.8968	1081.41	13.8922	13.8968	13.8968	13.8945	13.8922	1051.16
	13.9241	279.001	13.93	1602.34	13.9287	177.322	13.9287	13.9264	13.9287	1098.44	13.9241	13.9287	13.9287	13.9264	13.9241	1055.31
	13.9561	279.069	13.96	1617.19	13.9607	177.142	13.9607	13.9584	13.9607	1114.55	13.9561	13.9607	13.9607	13.9584	13.9561	1059.46
	13.988	279.272	13.99	1629.57	13.9926	177.089	13.9926	13.9903	13.9926	1130.25	13.988	13.9926	13.9926	13.9903	13.988	1062.72
	14.0199	279.68	14.02	1639.24	14.0246	177.076	14.0246	14.0223	14.0246	1143.64	14.0199	14.0246	14.0246	14.0223	14.0199	1065.1
	14.0519	280.033	14.06	1645.64	14.0565	177.05	14.0565	14.0542	14.0565	1154.78	14.0519	14.0565	14.0565	14.0542	14.0519	1066.31
	14.0838	280.387	14.09	1649.47	14.0885	177.153	14.0885	14.0861	14.0885	1164.07	14.0838	14.0885	14.0885	14.0861	14.0838	1066.04
	14.1157	280.78	14.12	1649.93	14.1204	177.228	14.1204	14.1181	14.1204	1171.22	14.1157	14.1204	14.1204	14.1181	14.1157	1064.28
	14.1477	281.155	14.15	1647.57	14.1524	177.352	14.1524	14.15	14.1524	1176.31	14.1477	14.1524	14.1524	14.15	14.1477	1060.77
	14.1796	281.459	14.18	1642.31	14.1843	177.51	14.1843	14.182	14.1843	1178.78	14.1796	14.1843	14.1843	14.182	14.1796	1055.75
	14.2116	281.711	14.22	1634.14	14.2162	177.66	14.2162	14.2139	14.2162	1178.89	14.2116	14.2162	14.2162	14.2139	14.2116	1048.72
	14.2435	281.968	14.25	1623.81	14.2482	177.769	14.2482	14.2458	14.2482	1176.64	14.2435	14.2482	14.2482	14.2458	14.2435	1040.74
	14.2754	282.167	14.28	1610.78	14.2801	177.945	14.2801	14.2778	14.2801	1173.12	14.2754	14.2801	14.2801	14.2778	14.2754	1030.77
	14.3074	282.24	14.31	1595.46	14.3121	177.96	14.3121	14.3097	14.3121	1167.21	14.3074	14.3121	14.3121	14.3097	14.3074	1020.28
	14.3393	282.197	14.34	1578.5	14.344	177.916	14.344	14.3417	14.344	1160.09	14.3393	14.344	14.344	14.3417	14.3393	1007.95
	14.3712	282.164	14.38	1560.28	14.376	177.825	14.376	14.3736	14.376	1151.85	14.3712	14.376	14.376	14.3736	14.3712	994.814
	14.4032	281.938	14.41	1540.95	14.4079	177.58	14.4079	14.4055	14.4079	1142.44	14.4032	14.4079	14.4079	14.4055	14.4032	981.241
	14.4351	281.627	14.44	1520.06	14.4399	177.346	14.4399	14.4375	14.4399	1131.99	14.4351	14.4399	14.4399	14.4375	14.4351	966.489
	14.467	281.312	14.47	1498.22	14.4718	177	14.4718	14.4694	14.4718	1120.05	14.467	14.4718	14.4718	14.4694	14.467	951.784
	14.499	280.898	14.5	1475.88	14.5038	176.472	14.5038	14.5014	14.5038	1108.35	14.499	14.5038	14.5038	14.5014	14.499	936.064
	14.5309	280.302	14.54	1453.07	14.5357	175.77	14.5357	14.5333	14.5357	1096.3	14.5309	14.5357	14.5357	14.5333	14.5309	920.146
	14.5629	279.655	14.57	1429.6	14.5677	175.063	14.5677	14.5653	14.5677	1083.77	14.5629	14.5677	14.5677	14.5653	14.5629	903.749
	14.5948	279.049	14.6	1405.5	14.5996	174.211	14.5996	14.5972	14.5996	1070.32	14.5948	14.5996	14.5996	14.5972	14.5948	887.26
	14.6267	278.356	14.63	1380.92	14.6315	173.287	14.6315	14.6291	14.6315	1057.04	14.6267	14.6315	14.6315	14.6291	14.6267	870.717
	14.6587	277.586	14.66	1356.1	14.6635	172.208	14.6635	14.6611	14.6635	1043.92	14.6587	14.6635	14.6635	14.6611	14.6587	854.097
	14.6906	276.8	14.7	1330.58	14.6954	171.105	14.6954	14.693	14.6954	1030.78	14.6906	14.6954	14.6954	14.693	14.6906	837.615
	14.7225	276.086	14.73	1305.59	14.7274	170.027	14.7274	14.725	14.7274	1017.52	14.7225	14.7274	14.7274	14.725	14.7225	821.047
	14.7545	275.403	14.76	1279.72	14.7593	168.841	14.7593	14.7569	14.7593	1004.12	14.7545	14.7593	14.7593	14.7569	14.7545	804.701
	14.7864	274.838	14.79	1253.96	14.7913	167.761	14.7913	14.7888	14.7913	990.435	14.7864	14.7913	14.7913	14.7888	14.7864	788.795
	14.8183	274.331	14.82	1228.07	14.8232	166.637	14.8232	14.8208	14.8232	977.512	14.8183	14.8232	14.8232	14.8208	14.8183	772.701
	14.8503	274.037	14.86	1202.43	14.8552	165.673	14.8552	14.8527	14.8552	965.09	14.8503	14.8552	14.8552	14.8527	14.8503	757.238
	14.8822	274.068	14.89	1177.74	14.8871	164.762	14.8871	14.8847	14.8871	952.796	14.8822	14.8871	14.8871	14.8847	14.8822	742.043
	14.9141	274.482	14.92	1152.82	14.9191	164.018	14.9191	14.9166	14.9191	940.672	14.9141	14.9191	14.9191	14.9166	14.9141	727.154
	14.9461	275.314	14.95	1128.16	14.951	163.588	14.951	14.9486	14.951	928.745	14.9461	14.951	14.951	14.9486	14.9461	713.088
	14.978	276.787	14.98	1103.95	14.983	163.522	14.983	14.9805	14.983	917.962	14.978	14.983	14.983	14.9805	14.978	699.011
	15.01	278.981	15.01	1081.08	15.0149	163.777	15.0149	15.0124	15.0149	907.714	15.01	15.0149	15.0149	15.0124	15.01	685.803
	15.0419	282.005	15.05	1058.94	15.0469	164.52	15.0469	15.0444	15.0469	898.286	15.0419	15.0469	15.0469	15.0444	15.0419	673.048
	15.0738	286.346	15.08	1037.26	15.0788	165.828	15.0788	15.0763	15.0788	889.183	15.0738	15.0788	15.0788	15.0763	15.0738	661.109
	15.1058	292.029	15.11	1017.09	15.1107	167.798	15.1107	15.1083	15.1107	880.703	15.1058	15.1107	15.1107	15.1083	15.1058	650.197
	15.1377	299.394	15.14	998.155	15.1427	170.854	15.1427	15.1402	15.1427	873.523	15.1377	15.1427	15.1427	15.1402	15.1377	639.651
	15.1696	308.755	15.17	980.897	15.1746	175.057	15.1746	15.1721	15.1746	867.136	15.1696	15.1746	15.1746	15.1721	15.1696	630.436
	15.2016	320.487	15.21	965.52	15.2066	180.596	15.2066	15.2041	15.2066	861.643	15.2016	15.2066	15.2066	15.2041	15.2016	621.932
	15.2335	335.259	15.24	951.507	15.2385	187.855	15.2385	15.236	15.2385	856.861	15.2335	15.2385	15.2385	15.236	15.2335	614.746
	15.2654	353.074	15.27	939.647	15.2705	197.06	15.2705	15.268	15.2705	853.237	15.2654	15.2705	15.2705	15.268	15.2654	608.67
	15.2974	375.434	15.3	929.334	15.3024	209.215	15.3024	15.2999	15.3024	850.521	15.2974	15.3024	15.3024	15.2999	15.2974	603.514
	15.3293	401.894	15.33	920.924	15.3344	224.07	15.3344	15.3318	15.3344	848.855	15.3293	15.3344	15.3344	15.3318	15.3293	599.591
	15.3613	433.181	15.37	914.563	15.3663	242.462	15.3663	15.3638	15.3663	847.927	15.3613	15.3663	15.3663	15.3638	15.3613	596.639
	15.3932	471.021	15.4	909.838	15.3983	265.749	15.3983	15.3957	15.3983	847.853	15.3932	15.3983	15.3983	15.3957	15.3932	594.61
	15.4251	515.23	15.43	906.839	15.4302	293.492	15.4302	15.4277	15.4302	848.611	15.4251	15.4302	15.4302	15.4277	15.4251	593.509
	15.4571	567.412	15.46	905.488	15.4622	328.133	15.4622	15.4596	15.4622	850.264	15.4571	15.4622	15.4622	15.4596	15.4571	593.143
	15.489	627.111	15.49	905.867	15.4941	369.077	15.4941	15.4916	15.4941	852.811	15.489	15.4941	15.4941	15.4916	15.489	593.548
	15.5209	695.383	15.53	907.653	15.5261	418.995	15.5261	15.5235	15.5261	856.089	15.5209	15.5261	15.5261	15.5235	15.5209	594.539
	15.5529	776.371	15.56	911.025	15.558	478.833	15.558	15.5554	15.558	860.478	15.5529	15.558	15.558	15.5554	15.5529	595.886
	15.5848	866.323	15.59	915.761	15.5899	547.155	15.5899	15.5874	15.5899	865.815	15.5848	15.5899	15.5899	15.5874	15.5848	597.647
	15.6167	970.41	15.62	921.811	15.6219	631.821	15.6219	15.6193	15.6219	871.864	15.6167	15.6219	15.6219	15.6193	15.6167	599.689
	15.6487	1086.17	15.65	928.816	15.6538	728.451	15.6538	15.6513	15.6538	878.806	15.6487	15.6538	15.6538	15.6513	15.6487	601.913
	15.6806	1214.74	15.69	936.918	15.6858	841.158	15.6858	15.6832	15.6858	886.744	15.6806	15.6858	15.6858	15.6832	15.6806	604.059
	15.7126	1363.27	15.72	946.303	15.7177	969.885	15.7177	15.7151	15.7177	895.875	15.7126	15.7177	15.7177	15.7151	15.7126	606.24
	15.7445	1523.97	15.75	956.074	15.7497	1118.13	15.7497	15.7471	15.7497	906.61	15.7445	15.7497	15.7497	15.7471	15.7445	607.941
	15.7764	1709.95	15.78	966.882	15.7816	1292.81	15.7816	15.779	15.7816	917.603	15.7764	15.7816	15.7816	15.779	15.7764	609.453
	15.8084	1907.55	15.81	978.013	15.8136	1482.38	15.8136	15.811	15.8136	929.917	15.8084	15.8136	15.8136	15.811	15.8084	610.337
	15.8403	2123.7	15.85	989.585	15.8455	1697.92	15.8455	15.8429	15.8455	943.483	15.8403	15.8455	15.8455	15.8429	15.8403	610.527
	15.8722	2364.84	15.88	1001.62	15.8775	1941.36	15.8775	15.8748	15.8775	959.177	15.8722	15.8775	15.8775	15.8748	15.8722	610.012
	15.9042	2624.62	15.91	1013.55	15.9094	2211.66	15.9094	15.9068	15.9094	976.34	15.9042	15.9094	15.9094	15.9068	15.9042	608.582
	15.9361	2908.17	15.94	1025.61	15.9414	2510.1	15.9414	15.9387	15.9414	994.086	15.9361	15.9414	15.9414	15.9387	15.9361	606.312
	15.968	3206.42	15.97	1037.16	15.9733	2829.55	15.9733	15.9707	15.9733	1013.61	15.968	15.9733	15.9733	15.9707	15.968	602.987
	16	3520.27	16.01	1047.95	16.0053	3182.2	16.0053	16.0026	16.0053	1034.4	16	16.0053	16.0053	16.0026	16	598.776
	16.0319	3863.35	16.04	1058.38	16.0372	3564.95	16.0372	16.0346	16.0372	1058.29	16.0319	16.0372	16.0372	16.0346	16.0319	593.556
	16.0638	4212.48	16.07	1067.72	16.0691	3960.15	16.0691	16.0665	16.0691	1083.4	16.0638	16.0691	16.0691	16.0665	16.0638	587.742
	16.0958	4580.92	16.1	1075.98	16.1011	4386.32	16.1011	16.0984	16.1011	1109.8	16.0958	16.1011	16.1011	16.0984	16.0958	580.862
	16.1277	4947.47	16.13	1082.62	16.133	4819.69	16.133	16.1304	16.133	1137.64	16.1277	16.133	16.133	16.1304	16.1277	573.437
	16.1597	5313.53	16.16	1087.64	16.165	5267.94	16.165	16.1623	16.165	1167.59	16.1597	16.165	16.165	16.1623	16.1597	565.309
	16.1916	5683.17	16.2	1091.15	16.1969	5711.48	16.1969	16.1943	16.1969	1200.61	16.1916	16.1969	16.1969	16.1943	16.1916	556.766
	16.2235	6032.46	16.23	1092.53	16.2289	6140.97	16.2289	16.2262	16.2289	1234.86	16.2235	16.2289	16.2289	16.2262	16.2235	547.758
	16.2555	6368.2	16.26	1091.91	16.2608	6570.89	16.2608	16.2581	16.2608	1269.11	16.2555	16.2608	16.2608	16.2581	16.2555	538.047
	16.2874	6665.45	16.29	1089.2	16.2928	6956.18	16.2928	16.2901	16.2928	1304.69	16.2874	16.2928	16.2928	16.2901	16.2874	528.506
	16.3193	6929.73	16.32	1084.35	16.3247	7316.66	16.3247	16.322	16.3247	1341.56	16.3193	16.3247	16.3247	16.322	16.3193	518.263
	16.3513	7160.23	16.36	1076.89	16.3567	7635.69	16.3567	16.354	16.3567	1380.25	16.3513	16.3567	16.3567	16.354	16.3513	508.386
	16.3832	7335.17	16.39	1067.64	16.3886	7905.6	16.3886	16.3859	16.3886	1418.32	16.3832	16.3886	16.3886	16.3859	16.3832	498.107
	16.4151	7468.67	16.42	1056.02	16.4206	8129.11	16.4206	16.4179	16.4206	1453.87	16.4151	16.4206	16.4206	16.4179	16.4151	487.728
	16.4471	7553.41	16.45	1042.54	16.4525	8296.99	16.4525	16.4498	16.4525	1488.23	16.4471	16.4525	16.4525	16.4498	16.4471	477.424
	16.479	7596.4	16.48	1027.35	16.4845	8414.56	16.4845	16.4817	16.4845	1520.69	16.479	16.4845	16.4845	16.4817	16.479	467.122
	16.511	7590.67	16.52	1009.89	16.5164	8478.21	16.5164	16.5137	16.5164	1551.82	16.511	16.5164	16.5164	16.5137	16.511	457.16
	16.5429	7543.52	16.55	991.448	16.5483	8499.7	16.5483	16.5456	16.5483	1578.14	16.5429	16.5483	16.5483	16.5456	16.5429	447.155
	16.5748	7461.72	16.58	971.164	16.5803	8475.86	16.5803	16.5776	16.5803	1599.45	16.5748	16.5803	16.5803	16.5776	16.5748	436.916
	16.6068	7349.8	16.61	950.732	16.6122	8416.27	16.6122	16.6095	16.6122	1616.22	16.6068	16.6122	16.6122	16.6095	16.6068	427.115
	16.6387	7209.55	16.64	929.384	16.6442	8318.58	16.6442	16.6414	16.6442	1627.53	16.6387	16.6442	16.6442	16.6414	16.6387	417.345
	16.6706	7044.99	16.68	906.883	16.6761	8193.98	16.6761	16.6734	16.6761	1633.45	16.6706	16.6761	16.6761	16.6734	16.6706	407.742
	16.7026	6864.19	16.71	884.207	16.7081	8044.02	16.7081	16.7053	16.7081	1632.67	16.7026	16.7081	16.7081	16.7053	16.7026	398.195
	16.7345	6662.25	16.74	860.807	16.74	7869.8	16.74	16.7373	16.74	1626.21	16.7345	16.74	16.74	16.7373	16.7345	388.568
	16.7664	6460.07	16.77	838.23	16.772	7680.72	16.772	16.7692	16.772	1614.08	16.7664	16.772	16.772	16.7692	16.7664	379.245
	16.7984	6247.02	16.8	815.102	16.8039	7473.02	16.8039	16.8011	16.8039	1596.57	16.7984	16.8039	16.8039	16.8011	16.7984	369.649
	16.8303	6025.13	16.84	791.392	16.8359	7257.77	16.8359	16.8331	16.8359	1572.56	16.8303	16.8359	16.8359	16.8331	16.8303	360.413
	16.8622	5803.18	16.87	768.498	16.8678	7035.64	16.8678	16.865	16.8678	1544.11	16.8622	16.8678	16.8678	16.865	16.8622	351.134
	16.8942	5580.89	16.9	745.265	16.8998	6804.39	16.8998	16.897	16.8998	1512.19	16.8942	16.8998	16.8998	16.897	16.8942	341.426
	16.9261	5363.37	16.93	722.587	16.9317	6573.76	16.9317	16.9289	16.9317	1476.49	16.9261	16.9317	16.9317	16.9289	16.9261	332.143
	16.9581	5147.88	16.96	700.096	16.9637	6339.58	16.9637	16.9609	16.9637	1437.74	16.9581	16.9637	16.9637	16.9609	16.9581	322.36
	16.99	4930.61	17	677.335	16.9956	6104.73	16.9956	16.9928	16.9956	1394.73	16.99	16.9956	16.9956	16.9928	16.99	313.111
	17.0219	4722.99	17.03	655.546	17.0275	5871.72	17.0275	17.0247	17.0275	1350.63	17.0219	17.0275	17.0275	17.0247	17.0219	303.61
	17.0539	4515.72	17.06	633.599	17.0595	5632.59	17.0595	17.0567	17.0595	1306.55	17.0539	17.0595	17.0595	17.0567	17.0539	293.911
	17.0858	4320.2	17.09	612.437	17.0914	5407.25	17.0914	17.0886	17.0914	1262.32	17.0858	17.0914	17.0914	17.0886	17.0858	284.516
	17.1177	4127.73	17.12	591.743	17.1234	5179.04	17.1234	17.1206	17.1234	1216.25	17.1177	17.1234	17.1234	17.1206	17.1177	275.174
	17.1497	3937.87	17.16	570.94	17.1553	4955.52	17.1553	17.1525	17.1553	1168.47	17.1497	17.1553	17.1553	17.1525	17.1497	266.037
	17.1816	3755.05	17.19	550.666	17.1873	4737.39	17.1873	17.1844	17.1873	1122.97	17.1816	17.1873	17.1873	17.1844	17.1816	257.025
	17.2135	3573.42	17.22	530.574	17.2192	4521.16	17.2192	17.2164	17.2192	1078.85	17.2135	17.2192	17.2192	17.2164	17.2135	248.165
	17.2455	3404.47	17.25	511.779	17.2512	4314.54	17.2512	17.2483	17.2512	1035.23	17.2455	17.2512	17.2512	17.2483	17.2455	239.617
	17.2774	3237.69	17.28	493.221	17.2831	4105.48	17.2831	17.2803	17.2831	991.993	17.2774	17.2831	17.2831	17.2803	17.2774	231.132
	17.3094	3072.12	17.32	474.819	17.3151	3905.87	17.3151	17.3122	17.3151	948.604	17.3094	17.3151	17.3151	17.3122	17.3094	223.162
	17.3413	2915.73	17.35	457.059	17.347	3713.12	17.347	17.3442	17.347	907.816	17.3413	17.347	17.347	17.3442	17.3413	215.334
	17.3732	2763.42	17.38	439.887	17.379	3520.34	17.379	17.3761	17.379	868.484	17.3732	17.379	17.379	17.3761	17.3732	207.622
	17.4052	2618.72	17.41	423.829	17.4109	3339.12	17.4109	17.408	17.4109	830.818	17.4052	17.4109	17.4109	17.408	17.4052	200.226
	17.4371	2477.9	17.44	407.79	17.4429	3159.84	17.4429	17.44	17.4429	794.148	17.4371	17.4429	17.4429	17.44	17.4371	193.083
	17.469	2339.14	17.47	392.052	17.4748	2989.52	17.4748	17.4719	17.4748	757.451	17.469	17.4748	17.4748	17.4719	17.469	186.311
	17.501	2210.01	17.51	377.29	17.5067	2822.71	17.5067	17.5039	17.5067	722.922	17.501	17.5067	17.5067	17.5039	17.501	179.81
	17.5329	2082.81	17.54	362.6	17.5387	2658.28	17.5387	17.5358	17.5387	690.173	17.5329	17.5387	17.5387	17.5358	17.5329	173.37
	17.5648	1962.19	17.57	348.738	17.5706	2506.21	17.5706	17.5677	17.5706	659.159	17.5648	17.5706	17.5706	17.5677	17.5648	167.402
	17.5968	1845.08	17.6	335.342	17.6026	2356.91	17.6026	17.5997	17.6026	628.442	17.5968	17.6026	17.6026	17.5997	17.5968	161.534
	17.6287	1732.36	17.63	322.204	17.6345	2214.15	17.6345	17.6316	17.6345	598.051	17.6287	17.6345	17.6345	17.6316	17.6287	156.033
	17.6607	1624.62	17.67	309.7	17.6665	2076.91	17.6665	17.6636	17.6665	569.705	17.6607	17.6665	17.6665	17.6636	17.6607	150.609
	17.6926	1521.5	17.7	297.351	17.6984	1944.38	17.6984	17.6955	17.6984	543.324	17.6926	17.6984	17.6984	17.6955	17.6926	145.422
	17.7245	1425.69	17.73	285.95	17.7304	1821.82	17.7304	17.7274	17.7304	517.958	17.7245	17.7304	17.7304	17.7274	17.7245	140.414
	17.7565	1332.71	17.76	274.794	17.7623	1699.95	17.7623	17.7594	17.7623	492.755	17.7565	17.7623	17.7623	17.7594	17.7565	135.495
	17.7884	1241.79	17.79	263.791	17.7943	1586.53	17.7943	17.7913	17.7943	468.27	17.7884	17.7943	17.7943	17.7913	17.7884	130.827
	17.8203	1157.45	17.83	253.39	17.8262	1479.26	17.8262	17.8233	17.8262	445.709	17.8203	17.8262	17.8262	17.8233	17.8203	126.131
	17.8523	1077.76	17.86	243.308	17.8582	1376.04	17.8582	17.8552	17.8582	424.407	17.8523	17.8582	17.8582	17.8552	17.8523	121.582
	17.8842	1003.57	17.89	233.843	17.8901	1280.18	17.8901	17.8872	17.8901	403.695	17.8842	17.8901	17.8901	17.8872	17.8842	117.173
	17.9161	931.11	17.92	224.344	17.9221	1186.1	17.9221	17.9191	17.9221	383.931	17.9161	17.9221	17.9221	17.9191	17.9161	112.933
	17.9481	862.578	17.95	215.203	17.954	1101.2	17.954	17.951	17.954	364.451	17.9481	17.954	17.954	17.951	17.9481	108.806
	17.98	798.808	17.99	206.485	17.9859	1019.93	17.9859	17.983	17.9859	346.394	17.98	17.9859	17.9859	17.983	17.98	104.774
	18.0119	738.201	18.02	197.921	18.0179	942.095	18.0179	18.0149	18.0179	329.427	18.0119	18.0179	18.0179	18.0149	18.0119	100.707
	18.0439	682.431	18.05	189.989	18.0498	871.553	18.0498	18.0469	18.0498	313.307	18.0439	18.0498	18.0498	18.0469	18.0439	96.928
	18.0758	629.891	18.08	182.263	18.0818	803.193	18.0818	18.0788	18.0818	297.918	18.0758	18.0818	18.0818	18.0788	18.0758	93.1645
	18.1078	580.102	18.11	174.779	18.1137	740.704	18.1137	18.1107	18.1137	282.591	18.1078	18.1137	18.1137	18.1107	18.1078	89.5322
	18.1397	533.655	18.15	167.66	18.1457	681.756	18.1457	18.1427	18.1457	268.455	18.1397	18.1457	18.1457	18.1427	18.1397	86.0032
	18.1716	490.221	18.18	160.912	18.1776	627.701	18.1776	18.1746	18.1776	255.579	18.1716	18.1776	18.1776	18.1746	18.1716	82.5722
	18.2036	451.099	18.21	154.417	18.2096	577.706	18.2096	18.2066	18.2096	243.299	18.2036	18.2096	18.2096	18.2066	18.2036	79.255
	18.2355	413.583	18.24	148.163	18.2415	529.731	18.2415	18.2385	18.2415	231.358	18.2355	18.2415	18.2415	18.2385	18.2355	76.141
	18.2674	378.457	18.27	142.213	18.2735	486.394	18.2735	18.2705	18.2735	219.735	18.2674	18.2735	18.2735	18.2705	18.2674	73.2142
	18.2994	346.208	18.31	136.646	18.3054	446.185	18.3054	18.3024	18.3054	209.02	18.2994	18.3054	18.3054	18.3024	18.2994	70.2939
	18.3313	316.153	18.34	131.34	18.3374	408.98	18.3374	18.3343	18.3374	199.179	18.3313	18.3374	18.3374	18.3343	18.3313	67.4999
	18.3632	289.414	18.37	126.445	18.3693	375.007	18.3693	18.3663	18.3693	189.954	18.3632	18.3693	18.3693	18.3663	18.3632	64.819
	18.3952	264.129	18.4	121.724	18.4013	342.754	18.4013	18.3982	18.4013	181.081	18.3952	18.4013	18.4013	18.3982	18.3952	62.2766
	18.4271	240.642	18.43	117.303	18.4332	313.906	18.4332	18.4302	18.4332	172.411	18.4271	18.4332	18.4332	18.4302	18.4271	59.8597
	18.4591	219.2	18.47	113.223	18.4651	287.165	18.4651	18.4621	18.4651	164.527	18.4591	18.4651	18.4651	18.4621	18.4591	57.5403
	18.491	199.378	18.5	109.395	18.4971	262.336	18.4971	18.494	18.4971	157.368	18.491	18.4971	18.4971	18.494	18.491	55.3535
	18.5229	181.876	18.53	105.836	18.529	240.111	18.529	18.526	18.529	150.642	18.5229	18.529	18.529	18.526	18.5229	53.2451
	18.5549	165.404	18.56	102.394	18.561	219.168	18.561	18.5579	18.561	144.174	18.5549	18.561	18.561	18.5579	18.5549	51.2627
	18.5868	150.31	18.59	99.2116	18.5929	200.795	18.5929	18.5899	18.5929	137.97	18.5868	18.5929	18.5929	18.5899	18.5868	49.3696
	18.6187	136.608	18.62	96.21	18.6249	183.631	18.6249	18.6218	18.6249	132.314	18.6187	18.6249	18.6249	18.6218	18.6187	47.6146
	18.6507	124.087	18.66	93.4898	18.6568	168.068	18.6568	18.6537	18.6568	127.119	18.6507	18.6568	18.6568	18.6537	18.6507	45.944
	18.6826	112.908	18.69	90.9523	18.6888	154.077	18.6888	18.6857	18.6888	122.29	18.6826	18.6888	18.6888	18.6857	18.6826	44.4428
	18.7145	102.528	18.72	88.5746	18.7207	140.923	18.7207	18.7176	18.7207	117.684	18.7145	18.7207	18.7207	18.7176	18.7145	43.0176
	18.7465	93.2012	18.75	86.3849	18.7527	129.516	18.7527	18.7496	18.7527	113.248	18.7465	18.7527	18.7527	18.7496	18.7465	41.675
	18.7784	84.682	18.78	84.3002	18.7846	118.834	18.7846	18.7815	18.7846	109.333	18.7784	18.7846	18.7846	18.7815	18.7784	40.4648
	18.8104	76.9615	18.82	82.4597	18.8166	109.1	18.8166	18.8135	18.8166	105.634	18.8104	18.8166	18.8166	18.8135	18.8104	39.3317
	18.8423	70.1557	18.85	80.7949	18.8485	100.443	18.8485	18.8454	18.8485	102.248	18.8423	18.8485	18.8485	18.8454	18.8423	38.3591
	18.8742	63.9661	18.88	79.2166	18.8804	92.5128	18.8804	18.8773	18.8804	99.0848	18.8742	18.8804	18.8804	18.8773	18.8742	37.5192
	18.9062	58.3518	18.91	77.8854	18.9124	85.3979	18.9124	18.9093	18.9124	96.1046	18.9062	18.9124	18.9124	18.9093	18.9062	36.8187
	18.9381	53.2844	18.94	76.7695	18.9443	78.8213	18.9443	18.9412	18.9443	93.4631	18.9381	18.9443	18.9443	18.9412	18.9381	36.2784
	18.97	48.7231	18.98	75.8767	18.9763	72.9477	18.9763	18.9732	18.9763	91.1399	18.97	18.9763	18.9763	18.9732	18.97	36.0594
	19.002	44.7412	19.01	75.4032	19.0082	67.7095	19.0082	19.0051	19.0082	89.0537	19.002	19.0082	19.0082	19.0051	19.002	36.0709
	19.0339	41.0454	19.04	75.3297	19.0402	62.8152	19.0402	19.037	19.0402	87.225	19.0339	19.0402	19.0402	19.037	19.0339	36.3695
	19.0658	37.8798	19.07	75.7848	19.0721	58.593	19.0721	19.069	19.0721	85.7484	19.0658	19.0721	19.0721	19.069	19.0658	36.9976
	19.0978	35.0344	19.1	76.8122	19.1041	54.6742	19.1041	19.1009	19.1041	84.7121	19.0978	19.1041	19.1041	19.1009	19.0978	38.0038
	19.1297	32.5624	19.14	78.5122	19.136	51.1587	19.136	19.1329	19.136	84.177	19.1297	19.136	19.136	19.1329	19.1297	39.4786
	19.1616	30.3911	19.17	80.9478	19.168	47.9548	19.168	19.1648	19.168	84.1635	19.1616	19.168	19.168	19.1648	19.1616	41.479
	19.1936	28.5067	19.2	84.3044	19.1999	45.0503	19.1999	19.1967	19.1999	84.8205	19.1936	19.1999	19.1999	19.1967	19.1936	43.8502
	19.2255	26.941	19.23	88.3462	19.2319	42.5401	19.2319	19.2287	19.2319	86.2429	19.2255	19.2319	19.2319	19.2287	19.2255	46.5859
	19.2575	25.6043	19.26	93.1219	19.2638	40.2072	19.2638	19.2606	19.2638	88.3967	19.2575	19.2638	19.2638	19.2606	19.2575	49.7998
	19.2894	24.5208	19.3	98.4701	19.2958	38.0786	19.2958	19.2926	19.2958	91.2144	19.2894	19.2958	19.2958	19.2926	19.2894	53.2174
	19.3213	23.677	19.33	104.209	19.3277	36.1905	19.3277	19.3245	19.3277	94.689	19.3213	19.3277	19.3277	19.3245	19.3213	56.8008
	19.3533	23.0428	19.36	110.212	19.3596	34.5118	19.3596	19.3565	19.3596	99.0171	19.3533	19.3596	19.3596	19.3565	19.3533	60.4272
	19.3852	22.6402	19.39	116.116	19.3916	33.0574	19.3916	19.3884	19.3916	103.941	19.3852	19.3916	19.3916	19.3884	19.3852	63.9709
	19.4171	22.3536	19.42	122.081	19.4235	31.7038	19.4235	19.4203	19.4235	109.041	19.4171	19.4235	19.4235	19.4203	19.4171	67.4666
	19.4491	22.2173	19.46	127.727	19.4555	30.5304	19.4555	19.4523	19.4555	114.385	19.4491	19.4555	19.4555	19.4523	19.4491	70.6255
	19.481	22.1834	19.49	132.697	19.4874	29.5101	19.4874	19.4842	19.4874	119.804	19.481	19.4874	19.4874	19.4842	19.481	73.6565
	19.5129	22.2375	19.52	137.276	19.5194	28.5837	19.5194	19.5162	19.5194	125.5	19.5129	19.5194	19.5194	19.5162	19.5129	76.3539
	19.5449	22.3799	19.55	141.271	19.5513	27.8196	19.5513	19.5481	19.5513	131.014	19.5449	19.5513	19.5513	19.5481	19.5449	78.6524
	19.5768	22.5226	19.58	144.911	19.5833	27.0967	19.5833	19.58	19.5833	135.972	19.5768	19.5833	19.5833	19.58	19.5768	80.7697
	19.6088	22.6998	19.62	147.844	19.6152	26.4876	19.6152	19.612	19.6152	140.659	19.6088	19.6152	19.6152	19.612	19.6088	82.4886
	19.6407	22.9036	19.65	150.056	19.6472	25.925	19.6472	19.6439	19.6472	144.811	19.6407	19.6472	19.6472	19.6439	19.6407	83.9339
	19.6726	22.9913	19.68	151.826	19.6791	25.368	19.6791	19.6759	19.6791	148.421	19.6726	19.6791	19.6791	19.6759	19.6726	84.9593
	19.7046	23.0729	19.71	152.976	19.7111	24.9876	19.7111	19.7078	19.7111	151.428	19.7046	19.7111	19.7111	19.7078	19.7046	85.586
	19.7365	23.2026	19.74	153.473	19.743	24.6479	19.743	19.7398	19.743	153.67	19.7365	19.743	19.743	19.7398	19.7365	85.8212
	19.7684	23.257	19.77	153.432	19.775	24.2878	19.775	19.7717	19.775	155.099	19.7684	19.775	19.775	19.7717	19.7684	85.6212
	19.8004	23.2636	19.81	152.936	19.8069	23.9139	19.8069	19.8036	19.8069	155.702	19.8004	19.8069	19.8069	19.8036	19.8004	84.9588
	19.8323	23.1817	19.84	151.83	19.8388	23.5657	19.8388	19.8356	19.8388	155.499	19.8323	19.8388	19.8388	19.8356	19.8323	83.8977
	19.8642	22.9701	19.87	150.29	19.8708	23.2845	19.8708	19.8675	19.8708	154.334	19.8642	19.8708	19.8708	19.8675	19.8642	82.5206
	19.8962	22.6917	19.9	148.401	19.9027	22.9969	19.9027	19.8995	19.9027	152.451	19.8962	19.9027	19.9027	19.8995	19.8962	80.6798
	19.9281	22.399	19.93	146.254	19.9347	22.73	19.9347	19.9314	19.9347	149.884	19.9281	19.9347	19.9347	19.9314	19.9281	78.685
	19.96	22.0181	19.97	143.908	19.9666	22.49	19.9666	19.9633	19.9666	146.7	19.96	19.9666	19.9666	19.9633	19.96	76.3766
	19.992	21.5086	20	141.316	19.9986	22.1816	19.9986	19.9953	19.9986	142.812	19.992	19.9986	19.9986	19.9953	19.992	74.0316
	20.0239	21.0067	20.03	138.653	20.0305	21.8667	20.0305	20.0272	20.0305	138.62	20.0239	20.0305	20.0305	20.0272	20.0239	71.6233
	20.0559	20.4411	20.06	135.861	20.0625	21.6185	20.0625	20.0592	20.0625	134.292	20.0559	20.0625	20.0625	20.0592	20.0559	69.0891
	20.0878	19.835	20.09	133.056	20.0944	21.3113	20.0944	20.0911	20.0944	129.808	20.0878	20.0944	20.0944	20.0911	20.0878	66.6396
	20.1197	19.1967	20.13	130.347	20.1264	21.0042	20.1264	20.123	20.1264	125.25	20.1197	20.1264	20.1264	20.123	20.1197	64.1771
	20.1517	18.5304	20.16	127.543	20.1583	20.6754	20.1583	20.155	20.1583	120.535	20.1517	20.1583	20.1583	20.155	20.1517	61.9863
	20.1836	17.891	20.19	125.221	20.1903	20.3752	20.1903	20.1869	20.1903	116.031	20.1836	20.1903	20.1903	20.1869	20.1836	60.1869
	20.2155	17.2935	20.22	123.408	20.2222	20.055	20.2222	20.2189	20.2222	111.852	20.2155	20.2222	20.2222	20.2189	20.2155	58.8266
	20.2475	16.736	20.25	122.235	20.2542	19.686	20.2542	20.2508	20.2542	107.951	20.2475	20.2542	20.2542	20.2508	20.2475	58.1148
	20.2794	16.2321	20.29	123.625	20.2861	19.33	20.2861	20.2828	20.2861	104.53	20.2794	20.2861	20.2861	20.2828	20.2794	59.472
	20.3113	15.8315	20.32	132.246	20.318	19.035	20.318	20.3147	20.318	101.659	20.3113	20.318	20.318	20.3147	20.3113	65.5674
	20.3433	15.5869	20.35	147.699	20.35	18.7726	20.35	20.3466	20.35	99.8705	20.3433	20.35	20.35	20.3466	20.3433	75.5954
	20.3752	15.5663	20.38	164.342	20.3819	18.5432	20.3819	20.3786	20.3819	100.954	20.3752	20.3819	20.3819	20.3786	20.3752	85.7796
	20.4072	16.1322	20.41	175.805	20.4139	18.3149	20.4139	20.4105	20.4139	106.413	20.4072	20.4139	20.4139	20.4105	20.4072	93.3173
	20.4391	17.6091	20.45	185.38	20.4458	18.1213	20.4458	20.4425	20.4458	114.487	20.4391	20.4458	20.4458	20.4425	20.4391	100.424
	20.471	20.1997	20.48	199.494	20.4778	17.9117	20.4778	20.4744	20.4778	123.089	20.471	20.4778	20.4778	20.4744	20.471	109.54
	20.503	23.6782	20.51	222.475	20.5097	17.8344	20.5097	20.5063	20.5097	133.242	20.503	20.5097	20.5097	20.5063	20.503	122.968
	20.5349	28.6371	20.54	255.078	20.5417	17.9646	20.5417	20.5383	20.5417	148.129	20.5349	20.5417	20.5417	20.5383	20.5349	142.838
	20.5668	35.2407	20.57	286.3	20.5736	18.2295	20.5736	20.5702	20.5736	169.871	20.5668	20.5736	20.5736	20.5702	20.5668	165.688
	20.5988	44.2286	20.61	310.721	20.6056	18.5546	20.6056	20.6022	20.6056	198.474	20.5988	20.6056	20.6056	20.6022	20.5988	184.388
	20.6307	56.3601	20.64	331.281	20.6375	19.0196	20.6375	20.6341	20.6375	230.146	20.6307	20.6375	20.6375	20.6341	20.6307	192.021
	20.6626	70.6963	20.67	347.087	20.6695	19.6233	20.6695	20.6661	20.6695	256.629	20.6626	20.6695	20.6695	20.6661	20.6626	189.611
	20.6946	86.8253	20.7	355.958	20.7014	20.3207	20.7014	20.698	20.7014	270.019	20.6946	20.7014	20.7014	20.698	20.6946	182.029
	20.7265	102.151	20.73	354.809	20.7334	21.1063	20.7334	20.7299	20.7334	272.431	20.7265	20.7334	20.7334	20.7299	20.7265	172.282
	20.7585	114.565	20.77	345.513	20.7653	21.9253	20.7653	20.7619	20.7653	269.776	20.7585	20.7653	20.7653	20.7619	20.7585	160.599
	20.7904	122.534	20.8	330.158	20.7972	22.6466	20.7972	20.7938	20.7972	263.802	20.7904	20.7972	20.7972	20.7938	20.7904	147.683
	20.8223	124.705	20.83	310.966	20.8292	23.0591	20.8292	20.8258	20.8292	252.66	20.8223	20.8292	20.8292	20.8258	20.8223	134.62
	20.8543	121.526	20.86	290.237	20.8611	23.0754	20.8611	20.8577	20.8611	237.684	20.8543	20.8611	20.8611	20.8577	20.8543	121.93
	20.8862	114.77	20.89	271.674	20.8931	22.7276	20.8931	20.8896	20.8931	221.564	20.8862	20.8931	20.8931	20.8896	20.8862	110.709
	20.9181	105.94	20.93	255.626	20.925	22.0811	20.925	20.9216	20.925	205.166	20.9181	20.925	20.925	20.9216	20.9181	100.865
	20.9501	96.2896	20.96	241.813	20.957	21.2849	20.957	20.9535	20.957	189.52	20.9501	20.957	20.957	20.9535	20.9501	92.6259
	20.982	87.3015	20.99	229.973	20.9889	20.4472	20.9889	20.9855	20.9889	176.177	20.982	20.9889	20.9889	20.9855	20.982	85.5887
	21.0139	78.8526	21.02	218.728	21.0209	19.5119	21.0209	21.0174	21.0209	165.028	21.0139	21.0209	21.0209	21.0174	21.0139	79.3601
	21.0459	71.667	21.05	208.512	21.0528	18.6022	21.0528	21.0493	21.0528	156.02	21.0459	21.0528	21.0528	21.0493	21.0459	74.1973
	21.0778	65.5236	21.08	198.657	21.0848	17.7462	21.0848	21.0813	21.0848	148.285	21.0778	21.0848	21.0848	21.0813	21.0778	69.7276
	21.1097	60.3128	21.12	189.399	21.1167	16.9317	21.1167	21.1132	21.1167	141.085	21.1097	21.1167	21.1167	21.1132	21.1097	66.1217
	21.1417	55.9858	21.15	181.085	21.1487	16.1428	21.1487	21.1452	21.1487	134.319	21.1417	21.1487	21.1487	21.1452	21.1417	62.9342
	21.1736	52.0136	21.18	173.003	21.1806	15.4398	21.1806	21.1771	21.1806	128.182	21.1736	21.1806	21.1806	21.1771	21.1736	59.8452
	21.2056	48.6332	21.21	165.548	21.2126	14.8494	21.2126	21.2091	21.2126	122.412	21.2056	21.2126	21.2126	21.2091	21.2056	57.0579
	21.2375	45.6027	21.24	158.741	21.2445	14.3197	21.2445	21.241	21.2445	116.864	21.2375	21.2445	21.2445	21.241	21.2375	54.3139
	21.2694	42.8056	21.28	152.316	21.2764	13.8836	21.2764	21.2729	21.2764	111.351	21.2694	21.2764	21.2764	21.2729	21.2694	51.7922
	21.3014	40.1628	21.31	146.414	21.3084	13.5414	21.3084	21.3049	21.3084	106.339	21.3014	21.3084	21.3084	21.3049	21.3014	49.2694
	21.3333	37.5353	21.34	140.837	21.3403	13.2253	21.3403	21.3368	21.3403	101.753	21.3333	21.3403	21.3403	21.3368	21.3333	46.7747
	21.3652	35.1952	21.37	136.158	21.3723	13.0235	21.3723	21.3688	21.3723	97.3035	21.3652	21.3723	21.3723	21.3688	21.3652	44.4632
	21.3972	32.9706	21.4	132.206	21.4042	12.8286	21.4042	21.4007	21.4042	92.9619	21.3972	21.4042	21.4042	21.4007	21.3972	42.1242
	21.4291	30.8431	21.44	128.915	21.4362	12.7013	21.4362	21.4326	21.4362	88.7489	21.4291	21.4362	21.4362	21.4326	21.4291	39.9379
	21.461	28.9111	21.47	126.172	21.4681	12.6215	21.4681	21.4646	21.4681	84.746	21.461	21.4681	21.4681	21.4646	21.461	37.8349
	21.493	27.047	21.5	123.776	21.5001	12.4938	21.5001	21.4965	21.5001	81.014	21.493	21.5001	21.5001	21.4965	21.493	35.7875
	21.5249	25.3414	21.53	121.833	21.532	12.4596	21.532	21.5285	21.532	77.5461	21.5249	21.532	21.532	21.5285	21.5249	33.9091
	21.5569	23.6231	21.56	120.001	21.564	12.3998	21.564	21.5604	21.564	74.295	21.5569	21.564	21.564	21.5604	21.5569	32.1786
	21.5888	21.981	21.6	118.34	21.5959	12.3925	21.5959	21.5924	21.5959	71.2132	21.5888	21.5959	21.5959	21.5924	21.5888	30.5385
	21.6207	20.4393	21.63	117.126	21.6279	12.4665	21.6279	21.6243	21.6279	68.443	21.6207	21.6279	21.6279	21.6243	21.6207	29.0097
	21.6527	18.9306	21.66	116.162	21.6598	12.5194	21.6598	21.6562	21.6598	65.9775	21.6527	21.6598	21.6598	21.6562	21.6527	27.5782
	21.6846	17.5863	21.69	115.492	21.6918	12.5861	21.6918	21.6882	21.6918	63.844	21.6846	21.6918	21.6918	21.6882	21.6846	26.2944
	21.7165	16.3381	21.72	115.107	21.7237	12.7265	21.7237	21.7201	21.7237	61.8662	21.7165	21.7237	21.7237	21.7201	21.7165	25.0952
	21.7485	15.1452	21.76	114.88	21.7556	12.9015	21.7556	21.7521	21.7556	59.9426	21.7485	21.7556	21.7556	21.7521	21.7485	24.0282
	21.7804	13.9926	21.79	114.694	21.7876	13.089	21.7876	21.784	21.7876	58.3171	21.7804	21.7876	21.7876	21.784	21.7804	23.0798
	21.8123	12.901	21.82	114.707	21.8195	13.264	21.8195	21.8159	21.8195	56.9827	21.8123	21.8195	21.8195	21.8159	21.8123	22.195
	21.8443	11.9938	21.85	114.87	21.8515	13.3722	21.8515	21.8479	21.8515	55.7703	21.8443	21.8515	21.8515	21.8479	21.8443	21.3447
	21.8762	11.1355	21.88	115.094	21.8834	13.4922	21.8834	21.8798	21.8834	54.5986	21.8762	21.8834	21.8834	21.8798	21.8762	20.494
	21.9081	10.2773	21.92	115.419	21.9154	13.6602	21.9154	21.9118	21.9154	53.481	21.9081	21.9154	21.9154	21.9118	21.9081	19.7551
	21.9401	9.56721	21.95	115.834	21.9473	13.7603	21.9473	21.9437	21.9473	52.4312	21.9401	21.9473	21.9473	21.9437	21.9401	19.0578
	21.972	8.93965	21.98	116.122	21.9793	13.8815	21.9793	21.9756	21.9793	51.3542	21.972	21.9793	21.9793	21.9756	21.972	18.3743
	22.004	8.62067	22.01	116.139	22.0112	13.971	22.0112	22.0076	22.0112	50.345	22.004	22.0112	22.0112	22.0076	22.004	17.8026
	22.0359	8.95442	22.04	115.779	22.0432	13.9975	22.0432	22.0395	22.0432	49.4171	22.0359	22.0432	22.0432	22.0395	22.0359	17.3563
	22.0678	9.7759	22.08	114.979	22.0751	14.0036	22.0751	22.0715	22.0751	48.523	22.0678	22.0751	22.0751	22.0715	22.0678	17.2441
	22.0998	10.5215	22.11	113.771	22.1071	14.0243	22.1071	22.1034	22.1071	47.6967	22.0998	22.1071	22.1071	22.1034	22.0998	17.9162
	22.1317	11.1456	22.14	112.173	22.139	13.9312	22.139	22.1354	22.139	46.9449	22.1317	22.139	22.139	22.1354	22.1317	19.5084
	22.1636	11.7364	22.17	110.515	22.171	13.8384	22.171	22.1673	22.171	46.1998	22.1636	22.171	22.171	22.1673	22.1636	21.3097
	22.1956	12.4768	22.2	110.184	22.2029	13.6708	22.2029	22.1992	22.2029	45.5632	22.1956	22.2029	22.2029	22.1992	22.1956	22.6488
	22.2275	13.3669	22.23	113.742	22.2348	13.4971	22.2348	22.2312	22.2348	45.1365	22.2275	22.2348	22.2348	22.2312	22.2275	23.552
	22.2594	14.2645	22.27	119.771	22.2668	13.2843	22.2668	22.2631	22.2668	56.407	22.2594	22.2668	22.2668	22.2631	22.2594	24.4807
	22.2914	15.1089	22.3	124.252	22.2987	13.0906	22.2987	22.2951	22.2987	88.0581	22.2914	22.2987	22.2987	22.2951	22.2914	25.8288
	22.3233	15.8565	22.33	126.607	22.3307	12.829	22.3307	22.327	22.3307	115.842	22.3233	22.3307	22.3307	22.327	22.3233	27.6486
	22.3553	16.5628	22.36	127.805	22.3626	12.5341	22.3626	22.3589	22.3626	123.414	22.3553	22.3626	22.3626	22.3589	22.3553	29.4387
	22.3872	17.1822	22.39	128.711	22.3946	12.2399	22.3946	22.3909	22.3946	127.552	22.3872	22.3946	22.3946	22.3909	22.3872	30.7819
	22.4191	17.7059	22.43	130.382	22.4265	11.8917	22.4265	22.4228	22.4265	133.33	22.4191	22.4265	22.4265	22.4228	22.4191	32.068
	22.4511	18.1473	22.46	133.112	22.4585	11.5166	22.4585	22.4548	22.4585	141.173	22.4511	22.4585	22.4585	22.4548	22.4511	33.3135
	22.483	18.3991	22.49	134.809	22.4904	11.2086	22.4904	22.4867	22.4904	158.939	22.483	22.4904	22.4904	22.4867	22.483	34.3074
	22.5149	18.4478	22.52	135.034	22.5224	10.8538	22.5224	22.5186	22.5224	184.867	22.5149	22.5224	22.5224	22.5186	22.5149	35.2597
	22.5469	18.2776	22.55	135.334	22.5543	10.4579	22.5543	22.5506	22.5543	200.174	22.5469	22.5543	22.5543	22.5506	22.5469	36.3528
	22.5788	17.923	22.59	135.319	22.5863	10.0556	22.5863	22.5825	22.5863	200.818	22.5788	22.5863	22.5863	22.5825	22.5788	38.2319
	22.6107	17.4265	22.62	135.092	22.6182	9.72074	22.6182	22.6145	22.6182	204.13	22.6107	22.6182	22.6182	22.6145	22.6107	40.6796
	22.6427	16.7883	22.65	135.595	22.6502	9.41154	22.6502	22.6464	22.6502	209.21	22.6427	22.6502	22.6502	22.6464	22.6427	43.5832
	22.6746	15.9862	22.68	137.674	22.6821	9.09013	22.6821	22.6784	22.6821	218.997	22.6746	22.6821	22.6821	22.6784	22.6746	47.1269
	22.7066	15.1642	22.71	142.255	22.714	8.80941	22.714	22.7103	22.714	245.704	22.7066	22.714	22.714	22.7103	22.7066	52.2455
	22.7385	14.3354	22.75	146.682	22.746	8.49451	22.746	22.7422	22.746	275.255	22.7385	22.746	22.746	22.7422	22.7385	59.0347
	22.7704	13.5261	22.78	149.766	22.7779	8.21297	22.7779	22.7742	22.7779	292.29	22.7704	22.7779	22.7779	22.7742	22.7704	66.4752
	22.8024	12.7915	22.81	152.459	22.8099	8.01688	22.8099	22.8061	22.8099	299.747	22.8024	22.8099	22.8099	22.8061	22.8024	73.9587
	22.8343	12.0571	22.84	157.352	22.8418	7.78782	22.8418	22.8381	22.8418	308.478	22.8343	22.8418	22.8418	22.8381	22.8343	80.6271
	22.8662	11.4385	22.87	164.947	22.8738	7.60027	22.8738	22.87	22.8738	322.539	22.8662	22.8738	22.8738	22.87	22.8662	85.9139
	22.8982	10.8475	22.91	174.306	22.9057	7.39847	22.9057	22.9019	22.9057	339.451	22.8982	22.9057	22.9057	22.9019	22.8982	89.5135
	22.9301	10.2425	22.94	186.472	22.9377	7.23044	22.9377	22.9339	22.9377	356.35	22.9301	22.9377	22.9377	22.9339	22.9301	92.0923
	22.962	9.7533	22.97	200.904	22.9696	7.13158	22.9696	22.9658	22.9696	373.006	22.962	22.9696	22.9696	22.9658	22.962	94.0262
	22.994	9.34545	23	214.924	23.0016	7.06323	23.0016	22.9978	23.0016	391.11	22.994	23.0016	23.0016	22.9978	22.994	96.0022
	23.0259	8.99839	23.03	226.659	23.0335	6.93467	23.0335	23.0297	23.0335	410.014	23.0259	23.0335	23.0335	23.0297	23.0259	97.9731
	23.0578	8.74685	23.07	237.55	23.0655	6.84028	23.0655	23.0617	23.0655	425.64	23.0578	23.0655	23.0655	23.0617	23.0578	99.1106
	23.0898	8.53612	23.1	247.587	23.0974	6.78698	23.0974	23.0936	23.0974	436.111	23.0898	23.0974	23.0974	23.0936	23.0898	99.6811
	23.1217	8.4131	23.13	255.629	23.1293	6.75403	23.1293	23.1255	23.1293	440.548	23.1217	23.1293	23.1293	23.1255	23.1217	99.3907
	23.1537	8.34537	23.16	262.072	23.1613	6.72718	23.1613	23.1575	23.1613	439.003	23.1537	23.1613	23.1613	23.1575	23.1537	98.3548
	23.1856	8.28429	23.19	266.445	23.1932	6.76013	23.1932	23.1894	23.1932	433.091	23.1856	23.1932	23.1932	23.1894	23.1856	96.5998
	23.2175	8.30484	23.23	269.644	23.2252	6.76664	23.2252	23.2214	23.2252	425.396	23.2175	23.2252	23.2252	23.2214	23.2175	94.1965
	23.2495	8.36621	23.26	271.208	23.2571	6.75932	23.2571	23.2533	23.2571	416.625	23.2495	23.2571	23.2571	23.2533	23.2495	91.2516
	23.2814	8.43423	23.29	271.463	23.2891	6.78536	23.2891	23.2852	23.2891	407.285	23.2814	23.2891	23.2891	23.2852	23.2814	87.8633
	23.3133	8.53554	23.32	271.135	23.321	6.79756	23.321	23.3172	23.321	397.315	23.3133	23.321	23.321	23.3172	23.3133	84.5975
	23.3453	8.69879	23.35	270.45	23.353	6.86388	23.353	23.3491	23.353	386.152	23.3453	23.353	23.353	23.3491	23.3453	81.424
	23.3772	8.86322	23.38	269.495	23.3849	6.95908	23.3849	23.3811	23.3849	372.091	23.3772	23.3849	23.3849	23.3811	23.3772	78.4932
	23.4091	9.02677	23.42	267.759	23.4169	7.09903	23.4169	23.413	23.4169	354.054	23.4091	23.4169	23.4169	23.413	23.4091	75.8334
	23.4411	9.22359	23.45	264.082	23.4488	7.21254	23.4488	23.4449	23.4488	331.486	23.4411	23.4488	23.4488	23.4449	23.4411	73.4177
	23.473	9.37961	23.48	257.797	23.4808	7.29351	23.4808	23.4769	23.4808	305.206	23.473	23.4808	23.4808	23.4769	23.473	71.3627
	23.505	9.5229	23.51	249.701	23.5127	7.43346	23.5127	23.5088	23.5127	277.213	23.505	23.5127	23.5127	23.5088	23.505	69.4382
	23.5369	9.74752	23.54	240.151	23.5447	7.57341	23.5447	23.5408	23.5447	251.63	23.5369	23.5447	23.5447	23.5408	23.5369	67.6383
	23.5688	9.95825	23.58	229.846	23.5766	7.7211	23.5766	23.5727	23.5766	228.066	23.5688	23.5766	23.5766	23.5727	23.5688	65.8659
	23.6008	10.1282	23.61	219.698	23.6085	7.86756	23.6085	23.6047	23.6085	207.103	23.6008	23.6085	23.6085	23.6047	23.6008	64.171
	23.6327	10.2651	23.64	209.89	23.6405	8.03437	23.6405	23.6366	23.6405	188.701	23.6327	23.6405	23.6405	23.6366	23.6327	62.5656
	23.6646	10.422	23.67	201.06	23.6724	8.22925	23.6724	23.6685	23.6724	174.938	23.6646	23.6724	23.6724	23.6685	23.6646	60.9596
	23.6966	10.6124	23.7	192.911	23.7044	8.43023	23.7044	23.7005	23.7044	164.493	23.6966	23.7044	23.7044	23.7005	23.6966	59.4109
	23.7285	10.6871	23.74	185.522	23.7363	8.59053	23.7363	23.7324	23.7363	156.027	23.7285	23.7363	23.7363	23.7324	23.7285	57.9456
	23.7604	10.7216	23.77	178.978	23.7683	8.77198	23.7683	23.7644	23.7683	149.044	23.7604	23.7683	23.7683	23.7644	23.7604	56.5427
	23.7924	10.8301	23.8	172.839	23.8002	8.97499	23.8002	23.7963	23.8002	143.151	23.7924	23.8002	23.8002	23.7963	23.7924	55.1604
	23.8243	10.8978	23.83	167.279	23.8322	9.14261	23.8322	23.8282	23.8322	138.234	23.8243	23.8322	23.8322	23.8282	23.8243	53.911
	23.8563	10.9387	23.86	162.128	23.8641	9.27728	23.8641	23.8602	23.8641	134.048	23.8563	23.8641	23.8641	23.8602	23.8563	52.7171
	23.8882	10.9528	23.9	157.384	23.8961	9.35906	23.8961	23.8921	23.8961	130.512	23.8882	23.8961	23.8961	23.8921	23.8882	51.6344
	23.9201	11.0073	23.93	153.114	23.928	9.47948	23.928	23.9241	23.928	127.315	23.9201	23.928	23.928	23.9241	23.9201	50.6083
	23.9521	10.9526	23.96	149.167	23.96	9.60642	23.96	23.956	23.96	124.552	23.9521	23.96	23.96	23.956	23.9521	49.5953
	23.984	10.8507	23.99	145.758	23.9919	9.61455	23.9919	23.988	23.9919	122.12	23.984	23.9919	23.9919	23.988	23.984	48.7774
	24.0159	10.8235	24.02	142.743	24.0239	9.64873	24.0239	24.0199	24.0239	120.075	24.0159	24.0239	24.0239	24.0199	24.0159	48.0574
	24.0479	10.8098	24.06	140.217	24.0558	9.74434	24.0558	24.0518	24.0558	118.368	24.0479	24.0558	24.0558	24.0518	24.0479	47.4416
	24.0798	10.7884	24.09	138.156	24.0877	9.76631	24.0877	24.0838	24.0877	116.824	24.0798	24.0877	24.0877	24.0838	24.0798	46.9525
	24.1117	10.7618	24.12	136.586	24.1197	9.76509	24.1197	24.1157	24.1197	115.591	24.1117	24.1197	24.1197	24.1157	24.1117	46.6022
	24.1437	10.7418	24.15	135.644	24.1516	9.79113	24.1516	24.1477	24.1516	114.595	24.1437	24.1516	24.1516	24.1477	24.1437	46.4328
	24.1756	10.7488	24.18	135.407	24.1836	9.81147	24.1836	24.1796	24.1836	114.033	24.1756	24.1836	24.1836	24.1796	24.1756	46.4798
	24.2075	10.7766	24.22	136.023	24.2155	9.82571	24.2155	24.2115	24.2155	113.722	24.2075	24.2155	24.2155	24.2115	24.2075	46.7357
	24.2395	10.9051	24.25	137.673	24.2475	9.83303	24.2475	24.2435	24.2475	113.769	24.2395	24.2475	24.2475	24.2435	24.2395	47.438
	24.2714	11.0741	24.28	141.05	24.2794	9.90626	24.2794	24.2754	24.2794	114.094	24.2714	24.2794	24.2794	24.2754	24.2714	48.7117
	24.3034	11.2848	24.31	146.834	24.3114	10.0129	24.3114	24.3074	24.3114	115.015	24.3034	24.3114	24.3114	24.3074	24.3034	50.7304
	24.3353	11.6111	24.34	156.998	24.3433	10.139	24.3433	24.3393	24.3433	116.499	24.3353	24.3433	24.3433	24.3393	24.3353	53.9491
	24.3672	12.0125	24.38	173.86	24.3753	10.3184	24.3753	24.3712	24.3753	118.707	24.3672	24.3753	24.3753	24.3712	24.3672	58.7439
	24.3992	12.5961	24.41	201.211	24.4072	10.6121	24.4072	24.4032	24.4072	122.127	24.3992	24.4072	24.4072	24.4032	24.3992	66.1981
	24.4311	13.4636	24.44	247.148	24.4392	10.9396	24.4392	24.4351	24.4392	127.498	24.4311	24.4392	24.4392	24.4351	24.4311	76.659
	24.463	14.6998	24.47	320.366	24.4711	11.3868	24.4711	24.4671	24.4711	135.552	24.463	24.4711	24.4711	24.4671	24.463	91.4997
	24.495	16.4059	24.5	432.039	24.5031	12.0536	24.5031	24.499	24.5031	147.276	24.495	24.5031	24.5031	24.499	24.495	112.161
	24.5269	18.7968	24.54	583.649	24.535	12.956	24.535	24.531	24.535	164.629	24.5269	24.535	24.535	24.531	24.5269	139.998
	24.5588	22.1458	24.57	770.665	24.5669	14.1444	24.5669	24.5629	24.5669	189.615	24.5588	24.5669	24.5669	24.5629	24.5588	176.862
	24.5908	26.8967	24.6	987.591	24.5989	15.7091	24.5989	24.5948	24.5989	226.773	24.5908	24.5989	24.5989	24.5948	24.5908	220.792
	24.6227	33.1159	24.63	1207.39	24.6308	17.7413	24.6308	24.6268	24.6308	277.267	24.6227	24.6308	24.6308	24.6268	24.6227	272.045
	24.6547	41.4827	24.66	1446.69	24.6628	20.4387	24.6628	24.6587	24.6628	342.215	24.6547	24.6628	24.6628	24.6587	24.6547	331.079
	24.6866	52.4124	24.69	1698.17	24.6947	23.7056	24.6947	24.6907	24.6947	419.544	24.6866	24.6947	24.6947	24.6907	24.6866	393.499
	24.7185	66.0484	24.73	1952.35	24.7267	27.6781	24.7267	24.7226	24.7267	508.036	24.7185	24.7267	24.7267	24.7226	24.7185	460.181
	24.7505	83.7617	24.76	2192.62	24.7586	32.5419	24.7586	24.7545	24.7586	607.039	24.7505	24.7586	24.7586	24.7545	24.7505	527.509
	24.7824	104.526	24.79	2385.74	24.7906	38.1327	24.7906	24.7865	24.7906	713.229	24.7824	24.7906	24.7906	24.7865	24.7824	598.435
	24.8143	130.035	24.82	2538.31	24.8225	45.0585	24.8225	24.8184	24.8225	822.758	24.8143	24.8225	24.8225	24.8184	24.8143	676.542
	24.8463	158.747	24.85	2632.38	24.8545	52.7226	24.8545	24.8504	24.8545	939.819	24.8463	24.8545	24.8545	24.8504	24.8463	755.582
	24.8782	190.73	24.89	2676.45	24.8864	61.3571	24.8864	24.8823	24.8864	1069.09	24.8782	24.8864	24.8864	24.8823	24.8782	834.963
	24.9101	226.285	24.92	2678.92	24.9184	71.2942	24.9184	24.9143	24.9184	1205.54	24.9101	24.9184	24.9184	24.9143	24.9101	907.204
	24.9421	263.848	24.95	2646.21	24.9503	82.0541	24.9503	24.9462	24.9503	1337.15	24.9421	24.9503	24.9503	24.9462	24.9421	970.658
	24.974	305.127	24.98	2584.39	24.9823	94.0674	24.9823	24.9781	24.9823	1451.93	24.974	24.9823	24.9823	24.9781	24.974	1025.06
	25.0059	347.916	25.01	2502.62	25.0142	106.807	25.0142	25.0101	25.0142	1550.3	25.0059	25.0142	25.0142	25.0101	25.0059	1066.11
	25.0379	393.545	25.05	2405.22	25.0461	120.762	25.0461	25.042	25.0461	1624.08	25.0379	25.0461	25.0461	25.042	25.0379	1094.47
	25.0698	442.913	25.08	2293.06	25.0781	135.734	25.0781	25.074	25.0781	1670.58	25.0698	25.0781	25.0781	25.074	25.0698	1110.19
	25.1018	491.677	25.11	2177.91	25.11	150.849	25.11	25.1059	25.11	1687.57	25.1018	25.11	25.11	25.1059	25.1018	1115.31
	25.1337	541.729	25.14	2058.6	25.142	167.452	25.142	25.1378	25.142	1676.64	25.1337	25.142	25.142	25.1378	25.1337	1110.61
	25.1656	588.946	25.17	1944.53	25.1739	184.156	25.1739	25.1698	25.1739	1642.6	25.1656	25.1739	25.1739	25.1698	25.1656	1096.93
	25.1976	632.307	25.21	1832.9	25.2059	201.326	25.2059	25.2017	25.2059	1589.98	25.1976	25.2059	25.2059	25.2017	25.1976	1075.88
	25.2295	671.29	25.24	1723.72	25.2378	218.534	25.2378	25.2337	25.2378	1521.21	25.2295	25.2378	25.2378	25.2337	25.2295	1049.56
	25.2614	701.984	25.27	1627.32	25.2698	235.118	25.2698	25.2656	25.2698	1440.42	25.2614	25.2698	25.2698	25.2656	25.2614	1019.02
	25.2934	726.426	25.3	1532.87	25.3017	251.841	25.3017	25.2975	25.3017	1359.08	25.2934	25.3017	25.3017	25.2975	25.2934	984.177
	25.3253	741.732	25.33	1446.68	25.3337	266.901	25.3337	25.3295	25.3337	1275.55	25.3253	25.3337	25.3337	25.3295	25.3253	948.644
	25.3572	749.206	25.37	1366.63	25.3656	280.871	25.3656	25.3614	25.3656	1191.63	25.3572	25.3656	25.3656	25.3614	25.3572	911.206
	25.3892	749.011	25.4	1291.66	25.3976	293.58	25.3976	25.3934	25.3976	1107.43	25.3892	25.3976	25.3976	25.3934	25.3892	874.691
	25.4211	742.193	25.43	1223.87	25.4295	304.334	25.4295	25.4253	25.4295	1028.55	25.4211	25.4295	25.4295	25.4253	25.4211	838.282
	25.4531	729.527	25.46	1158.25	25.4615	313.161	25.4615	25.4573	25.4615	958.696	25.4531	25.4615	25.4615	25.4573	25.4531	801.217
	25.485	712.549	25.49	1099.99	25.4934	319.874	25.4934	25.4892	25.4934	893.707	25.485	25.4934	25.4934	25.4892	25.485	765.877
	25.5169	692.106	25.53	1046.21	25.5253	324.714	25.5253	25.5211	25.5253	833.582	25.5169	25.5253	25.5253	25.5211	25.5169	731.378
	25.5489	668.545	25.56	995.903	25.5573	327.575	25.5573	25.5531	25.5573	778.895	25.5489	25.5573	25.5573	25.5531	25.5489	699.127
	25.5808	644.482	25.59	950.018	25.5892	328.485	25.5892	25.585	25.5892	730.541	25.5808	25.5892	25.5892	25.585	25.5808	667.85
	25.6127	618.435	25.62	907.467	25.6212	327.605	25.6212	25.617	25.6212	688.256	25.6127	25.6212	25.6212	25.617	25.6127	637.364
	25.6447	592.96	25.65	869.684	25.6531	325.215	25.6531	25.6489	25.6531	650.753	25.6447	25.6531	25.6531	25.6489	25.6447	608.559
	25.6766	567.419	25.69	833.992	25.6851	321.408	25.6851	25.6808	25.6851	617.138	25.6766	25.6851	25.6851	25.6808	25.6766	581.243
	25.7085	542.157	25.72	800.864	25.717	316.434	25.717	25.7128	25.717	586.3	25.7085	25.717	25.717	25.7128	25.7085	556.059
	25.7405	518.136	25.75	771.098	25.749	310.414	25.749	25.7447	25.749	559.085	25.7405	25.749	25.749	25.7447	25.7405	532.193
	25.7724	494.294	25.78	742.314	25.7809	303.295	25.7809	25.7767	25.7809	535.135	25.7724	25.7809	25.7809	25.7767	25.7724	508.942
	25.8044	472.175	25.81	716.712	25.8129	295.765	25.8129	25.8086	25.8129	513.82	25.8044	25.8129	25.8129	25.8086	25.8044	487.48
	25.8363	450.855	25.84	692.095	25.8448	287.558	25.8448	25.8405	25.8448	494.198	25.8363	25.8448	25.8448	25.8405	25.8363	467.003
	25.8682	430.309	25.88	669.245	25.8768	278.893	25.8768	25.8725	25.8768	475.728	25.8682	25.8768	25.8768	25.8725	25.8682	448.367
	25.9002	411.168	25.91	648.073	25.9087	269.945	25.9087	25.9044	25.9087	459.309	25.9002	25.9087	25.9087	25.9044	25.9002	430.676
	25.9321	392.437	25.94	627.409	25.9407	260.582	25.9407	25.9364	25.9407	444.605	25.9321	25.9407	25.9407	25.9364	25.9321	413.495
	25.964	375.339	25.97	608.059	25.9726	251.377	25.9726	25.9683	25.9726	431.031	25.964	25.9726	25.9726	25.9683	25.964	397.6
	25.996	358.787	26	589.936	26.0045	241.835	26.0045	26.0003	26.0045	418.108	25.996	26.0045	26.0045	26.0003	25.996	382.482
	26.0279	342.989	26.04	572.474	26.0365	232.341	26.0365	26.0322	26.0365	405.822	26.0279	26.0365	26.0365	26.0322	26.0279	368.435
	26.0598	328.335	26.07	555.864	26.0684	223.044	26.0684	26.0641	26.0684	394.565	26.0598	26.0684	26.0684	26.0641	26.0598	355.199
	26.0918	314.075	26.1	539.165	26.1004	213.7	26.1004	26.0961	26.1004	384.181	26.0918	26.1004	26.1004	26.0961	26.0918	342.037
	26.1237	300.965	26.13	523.85	26.1323	204.644	26.1323	26.128	26.1323	374.204	26.1237	26.1323	26.1323	26.128	26.1237	329.795
	26.1556	288.273	26.16	508.846	26.1643	195.61	26.1643	26.16	26.1643	364.526	26.1556	26.1643	26.1643	26.16	26.1556	317.965
	26.1876	276.257	26.2	494.101	26.1962	186.899	26.1962	26.1919	26.1962	355.023	26.1876	26.1962	26.1962	26.1919	26.1876	306.97
	26.2195	265.001	26.23	479.785	26.2282	178.566	26.2282	26.2238	26.2282	345.987	26.2195	26.2282	26.2282	26.2238	26.2195	296.137
	26.2515	253.871	26.26	465.425	26.2601	170.225	26.2601	26.2558	26.2601	337.325	26.2515	26.2601	26.2601	26.2558	26.2515	285.633
	26.2834	243.858	26.29	451.999	26.2921	162.411	26.2921	26.2877	26.2921	328.824	26.2834	26.2921	26.2921	26.2877	26.2834	275.493
	26.3153	234.091	26.32	438.409	26.324	154.726	26.324	26.3197	26.324	320.344	26.3153	26.324	26.324	26.3197	26.3153	265.665
	26.3473	224.721	26.36	425.083	26.356	147.445	26.356	26.3516	26.356	311.769	26.3473	26.356	26.356	26.3516	26.3473	256.317
	26.3792	215.87	26.39	412.17	26.3879	140.518	26.3879	26.3836	26.3879	303.377	26.3792	26.3879	26.3879	26.3836	26.3792	247.114
	26.4111	207.352	26.42	399.118	26.4199	133.767	26.4199	26.4155	26.4199	295.162	26.4111	26.4199	26.4199	26.4155	26.4111	237.803
	26.4431	199.275	26.45	386.486	26.4518	127.473	26.4518	26.4474	26.4518	286.993	26.4431	26.4518	26.4518	26.4474	26.4431	228.862
	26.475	191.422	26.48	373.951	26.4837	121.283	26.4837	26.4794	26.4837	278.621	26.475	26.4837	26.4837	26.4794	26.475	220.094
	26.5069	183.895	26.52	361.554	26.5157	115.501	26.5157	26.5113	26.5157	270.094	26.5069	26.5157	26.5157	26.5113	26.5069	211.672
	26.5389	176.688	26.55	349.471	26.5476	110.001	26.5476	26.5433	26.5476	261.614	26.5389	26.5476	26.5476	26.5433	26.5389	203.368
	26.5708	169.519	26.58	337.009	26.5796	104.647	26.5796	26.5752	26.5796	253.391	26.5708	26.5796	26.5796	26.5752	26.5708	194.888
	26.6028	162.752	26.61	325.284	26.6115	99.7323	26.6115	26.6071	26.6115	245.203	26.6028	26.6115	26.6115	26.6071	26.6028	186.782
	26.6347	156.13	26.64	313.493	26.6435	94.914	26.6435	26.6391	26.6435	236.682	26.6347	26.6435	26.6435	26.6391	26.6347	178.809
	26.6666	149.719	26.68	301.956	26.6754	90.3801	26.6754	26.671	26.6754	228.033	26.6666	26.6754	26.6754	26.671	26.6666	171.154
	26.6986	143.444	26.71	290.333	26.7074	85.9899	26.7074	26.703	26.7074	219.654	26.6986	26.7074	26.7074	26.703	26.6986	163.492
	26.7305	137.183	26.74	278.687	26.7393	81.7567	26.7393	26.7349	26.7393	211.479	26.7305	26.7393	26.7393	26.7349	26.7305	155.876
	26.7624	131.423	26.77	267.768	26.7713	77.8501	26.7713	26.7668	26.7713	203.27	26.7624	26.7713	26.7713	26.7668	26.7624	148.385
	26.7944	125.561	26.8	256.653	26.8032	74.0071	26.8032	26.7988	26.8032	194.993	26.7944	26.8032	26.8032	26.7988	26.7944	140.989
	26.8263	119.813	26.84	245.576	26.8352	70.3329	26.8352	26.8307	26.8352	186.73	26.8263	26.8352	26.8352	26.8307	26.8263	133.942
	26.8582	114.201	26.87	234.741	26.8671	66.8242	26.8671	26.8627	26.8671	178.785	26.8582	26.8671	26.8671	26.8627	26.8582	127.005
	26.8902	108.769	26.9	224.012	26.899	63.3457	26.899	26.8946	26.899	170.88	26.8902	26.899	26.899	26.8946	26.8902	120.095
	26.9221	103.489	26.93	213.783	26.931	60.1158	26.931	26.9266	26.931	163.301	26.9221	26.931	26.931	26.9266	26.9221	113.343
	26.9541	98.2139	26.96	203.429	26.9629	56.9237	26.9629	26.9585	26.9629	155.688	26.9541	26.9629	26.9629	26.9585	26.9541	106.906
	26.986	93.127	26.99	193.371	26.9949	53.9094	26.9949	26.9904	26.9949	148.062	26.986	26.9949	26.9949	26.9904	26.986	100.776
	27.0179	88.1743	27.03	183.673	27.0268	50.9573	27.0268	27.0224	27.0268	140.692	27.0179	27.0268	27.0268	27.0224	27.0179	94.8987
	27.0499	83.2804	27.06	174.051	27.0588	48.0333	27.0588	27.0543	27.0588	133.777	27.0499	27.0588	27.0588	27.0543	27.0499	89.2734
	27.0818	78.6131	27.09	164.804	27.0907	45.3091	27.0907	27.0863	27.0907	126.977	27.0818	27.0907	27.0907	27.0863	27.0818	84.088
	27.1137	73.9913	27.12	155.743	27.1227	42.6621	27.1227	27.1182	27.1227	120.149	27.1137	27.1227	27.1227	27.1182	27.1137	79.3942
	27.1457	69.5852	27.15	147.094	27.1546	40.0714	27.1546	27.1501	27.1546	113.485	27.1457	27.1546	27.1546	27.1501	27.1457	75.1408
	27.1776	65.2285	27.19	138.665	27.1866	37.5152	27.1866	27.1821	27.1866	107.192	27.1776	27.1866	27.1866	27.1821	27.1776	71.1614
	27.2095	61.0156	27.22	130.411	27.2185	35.0948	27.2185	27.214	27.2185	101.259	27.2095	27.2185	27.2185	27.214	27.2095	67.4494
	27.2415	57.0026	27.25	122.795	27.2505	32.7925	27.2505	27.246	27.2505	95.4273	27.2415	27.2505	27.2505	27.246	27.2415	64.063
	27.2734	53.0257	27.28	115.437	27.2824	30.5081	27.2824	27.2779	27.2824	89.6295	27.2734	27.2824	27.2824	27.2779	27.2734	61.1809
	27.3053	49.2161	27.31	108.444	27.3144	28.3534	27.3144	27.3099	27.3144	84.0755	27.3053	27.3144	27.3144	27.3099	27.3053	58.7694
	27.3373	45.5344	27.35	101.807	27.3463	26.2757	27.3463	27.3418	27.3463	78.8398	27.3373	27.3463	27.3463	27.3418	27.3373	56.71
	27.3692	42.0024	27.38	95.5756	27.3782	24.2972	27.3782	27.3737	27.3782	73.936	27.3692	27.3782	27.3782	27.3737	27.3692	55.205
	27.4012	38.7095	27.41	89.9081	27.4102	22.492	27.4102	27.4057	27.4102	69.1677	27.4012	27.4102	27.4102	27.4057	27.4012	53.9691
	27.4331	35.3993	27.44	84.4949	27.4421	20.6775	27.4421	27.4376	27.4421	64.6432	27.4331	27.4421	27.4421	27.4376	27.4331	52.9848
	27.465	32.2853	27.47	79.4681	27.4741	19.0062	27.4741	27.4696	27.4741	60.3084	27.465	27.4741	27.4741	27.4696	27.465	52.252
	27.497	29.4147	27.51	74.9977	27.506	17.3967	27.506	27.5015	27.506	56.2106	27.497	27.506	27.506	27.5015	27.497	51.7917
	27.5289	26.617	27.54	70.78	27.538	15.8873	27.538	27.5334	27.538	52.4921	27.5289	27.538	27.538	27.5334	27.5289	51.6113
	27.5608	24.0376	27.57	66.9975	27.5699	14.5301	27.5699	27.5654	27.5699	49.0581	27.5608	27.5699	27.5699	27.5654	27.5608	51.3806
	27.5928	21.6181	27.6	63.4025	27.6019	13.1928	27.6019	27.5973	27.6019	45.7596	27.5928	27.6019	27.6019	27.5973	27.5928	51.2184
	27.6247	19.2865	27.63	60.222	27.6338	12.019	27.6338	27.6293	27.6338	42.671	27.6247	27.6338	27.6338	27.6293	27.6247	51.2012
	27.6566	17.0816	27.67	57.2829	27.6658	10.9055	27.6658	27.6612	27.6658	39.9008	27.6566	27.6658	27.6658	27.6612	27.6566	51.2799
	27.6886	15.032	27.7	54.6342	27.6977	9.83669	27.6977	27.6931	27.6977	37.5031	27.6886	27.6977	27.6977	27.6931	27.6886	51.3932
	27.7205	13.228	27.73	52.2331	27.7297	8.91682	27.7297	27.7251	27.7297	35.295	27.7205	27.7297	27.7297	27.7251	27.7205	51.4345
	27.7525	11.502	27.76	50.0386	27.7616	8.03152	27.7616	27.757	27.7616	33.2089	27.7525	27.7616	27.7616	27.757	27.7525	51.5288
	27.7844	9.93746	27.79	48.168	27.7936	7.27927	27.7936	27.789	27.7936	31.4072	27.7844	27.7936	27.7936	27.789	27.7844	51.5998
	27.8163	8.4942	27.83	46.4669	27.8255	6.58804	27.8255	27.8209	27.8255	29.8968	27.8163	27.8255	27.8255	27.8209	27.8163	51.6053
	27.8483	7.23504	27.86	44.9833	27.8574	5.9501	27.8574	27.8529	27.8574	28.5828	27.8483	27.8574	27.8574	27.8529	27.8483	51.4401
	27.8802	6.12553	27.89	43.7152	27.8894	5.41958	27.8894	27.8848	27.8894	27.3975	27.8802	27.8894	27.8894	27.8848	27.8802	51.0624
	27.9121	5.09882	27.92	42.5967	27.9213	4.92323	27.9213	27.9167	27.9213	26.3748	27.9121	27.9213	27.9213	27.9167	27.9121	50.6535
	27.9441	4.20091	27.95	41.6134	27.9533	4.4997	27.9533	27.9487	27.9533	25.5213	27.9441	27.9533	27.9533	27.9487	27.9441	50.0666
	27.976	3.40431	27.99	40.8297	27.9852	4.16406	27.9852	27.9806	27.9852	24.8914	27.976	27.9852	27.9852	27.9806	27.976	49.3153
	28.0079	2.74434	28.02	40.2272	28.0172	3.89635	28.0172	28.0126	28.0172	24.3767	28.0079	28.0172	28.0172	28.0126	28.0079	48.4
	28.0399	2.19321	28.05	39.6233	28.0491	3.68113	28.0491	28.0445	28.0491	23.9703	28.0399	28.0491	28.0491	28.0445	28.0399	47.3569
	28.0718	1.75757	28.08	39.1291	28.0811	3.52694	28.0811	28.0764	28.0811	23.7197	28.0718	28.0811	28.0811	28.0764	28.0718	46.2283
	28.1037	1.41745	28.11	38.8072	28.113	3.36583	28.113	28.1084	28.113	23.6113	28.1037	28.113	28.113	28.1084	28.1037	44.9861
	28.1357	1.11844	28.14	38.5677	28.145	3.27754	28.145	28.1403	28.145	23.5707	28.1357	28.145	28.145	28.1403	28.1357	43.5945
	28.1676	0.886287	28.18	38.3687	28.1769	3.24459	28.1769	28.1723	28.1769	23.5842	28.1676	28.1769	28.1769	28.1723	28.1676	42.1937
	28.1996	0.743584	28.21	38.2121	28.2089	3.21896	28.2089	28.2042	28.2089	23.6519	28.1996	28.2089	28.2089	28.2042	28.1996	40.8772
	28.2315	0.690041	28.24	38.0789	28.2408	3.25191	28.2408	28.2362	28.2408	23.7806	28.2315	28.2408	28.2408	28.2362	28.2315	39.4343
	28.2634	0.730271	28.27	38.1118	28.2728	3.25801	28.2728	28.2681	28.2728	23.9974	28.2634	28.2728	28.2728	28.2681	28.2634	37.9481
	28.2954	0.82492	28.3	38.1481	28.3047	3.31782	28.3047	28.3	28.3047	24.2209	28.2954	28.3047	28.3047	28.3	28.2954	36.5103
	28.3273	0.940705	28.34	38.0725	28.3366	3.4118	28.3366	28.332	28.3366	24.4512	28.3273	28.3366	28.3366	28.332	28.3273	35.0867
	28.3592	1.01509	28.37	38.027	28.3686	3.52653	28.3686	28.3639	28.3686	24.7289	28.3592	28.3686	28.3686	28.3639	28.3592	33.7415
	28.3912	1.14419	28.4	38.0131	28.4005	3.64004	28.4005	28.3959	28.4005	25.0337	28.3912	28.4005	28.4005	28.3959	28.3912	32.4321
	28.4231	1.38907	28.43	37.9258	28.4325	3.76047	28.4325	28.4278	28.4325	25.3046	28.4231	28.4325	28.4325	28.4278	28.4231	31.179
	28.455	1.62643	28.46	37.7759	28.4644	3.8756	28.4644	28.4597	28.4644	25.5213	28.455	28.4644	28.4644	28.4597	28.455	29.9816
	28.487	1.87102	28.5	37.6425	28.4964	3.99644	28.4964	28.4917	28.4964	25.7584	28.487	28.4964	28.4964	28.4917	28.487	28.8763
	28.5189	2.09593	28.53	37.4528	28.5283	4.17097	28.5283	28.5236	28.5283	25.9955	28.5189	28.5283	28.5283	28.5236	28.5189	27.8355
	28.5509	2.3414	28.56	37.1133	28.5603	4.31825	28.5603	28.5556	28.5603	26.1648	28.5509	28.5603	28.5603	28.5556	28.5509	26.7538
	28.5828	2.59323	28.59	36.7198	28.5922	4.43908	28.5922	28.5875	28.5922	26.307	28.5828	28.5922	28.5922	28.5875	28.5828	25.7493
	28.6147	2.79701	28.62	36.3558	28.6242	4.55992	28.6242	28.6194	28.6242	26.3544	28.6147	28.6242	28.6242	28.6194	28.6147	24.8219
	28.6467	3.00079	28.66	35.862	28.6561	4.65268	28.6561	28.6514	28.6561	26.4086	28.6467	28.6561	28.6561	28.6514	28.6467	23.889
	28.6786	3.22541	28.69	35.3654	28.6881	4.7194	28.6881	28.6833	28.6881	26.4493	28.6786	28.6881	28.6881	28.6833	28.6786	22.9988
	28.7105	3.44308	28.72	34.7864	28.72	4.83332	28.72	28.7153	28.72	26.4018	28.7105	28.72	28.72	28.7153	28.7105	22.1791
	28.7425	3.61994	28.75	34.1863	28.752	4.90695	28.752	28.7472	28.752	26.2732	28.7425	28.752	28.752	28.7472	28.7425	21.3461
	28.7744	3.75021	28.78	33.5174	28.7839	4.94723	28.7839	28.7792	28.7839	26.1309	28.7744	28.7839	28.7839	28.7792	28.7744	20.4921
	28.8063	3.82518	28.82	32.7799	28.8158	4.9753	28.8158	28.8111	28.8158	25.9277	28.8063	28.8158	28.8158	28.8111	28.8063	19.6602
	28.8383	3.91288	28.85	32.039	28.8478	4.97612	28.8478	28.843	28.8478	25.6432	28.8383	28.8478	28.8478	28.843	28.8383	18.8785
	28.8702	3.97454	28.88	31.3023	28.8797	4.9749	28.8797	28.875	28.8797	25.291	28.8702	28.8797	28.8797	28.875	28.8702	18.1111
	28.9022	3.94762	28.91	30.5444	28.9117	4.94805	28.9117	28.9069	28.9117	24.8779	28.9022	28.9117	28.9117	28.9069	28.9022	17.3087
	28.9341	3.921	28.94	29.7343	28.9436	4.84105	28.9436	28.9389	28.9436	24.4579	28.9341	28.9436	28.9436	28.9389	28.9341	16.4294
	28.966	3.86687	28.98	28.9769	28.9756	4.72713	28.9756	28.9708	28.9756	23.9838	28.966	28.9756	28.9756	28.9708	28.966	15.6276
	28.998	3.74443	29.01	28.243	29.0075	4.65959	29.0075	29.0027	29.0075	23.4555	28.998	29.0075	29.0075	29.0027	28.998	14.8755
	29.0299	3.54906	29.04	27.4803	29.0395	4.55219	29.0395	29.0347	29.0395	22.8933	29.0299	29.0395	29.0395	29.0347	29.0299	14.1022
	29.0618	3.31083	29.07	26.7807	29.0714	4.3927	29.0714	29.0666	29.0714	22.2702	29.0618	29.0714	29.0714	29.0666	29.0618	13.3299
	29.0938	3.09228	29.1	26.0454	29.1034	4.27268	29.1034	29.0986	29.1034	21.6945	29.0938	29.1034	29.1034	29.0986	29.0938	12.5646
	29.1257	2.85405	29.14	25.407	29.1353	4.12418	29.1353	29.1305	29.1353	21.1052	29.1257	29.1353	29.1353	29.1305	29.1257	11.8623
	29.1576	2.60251	29.17	24.8296	29.1673	3.94314	29.1673	29.1624	29.1673	20.4482	29.1576	29.1673	29.1673	29.1624	29.1576	11.1745
	29.1896	2.28266	29.2	24.2495	29.1992	3.75436	29.1992	29.1944	29.1992	19.798	29.1896	29.1992	29.1992	29.1944	29.1896	10.5359
	29.2215	1.96975	29.23	23.749	29.2312	3.57291	29.2312	29.2263	29.2312	19.1749	29.2215	29.2312	29.2312	29.2263	29.2215	9.91127
	29.2534	1.64383	29.26	23.3576	29.2631	3.36623	29.2631	29.2583	29.2631	18.5585	29.2534	29.2631	29.2631	29.2583	29.2534	9.35653
	29.2854	1.304	29.3	23.0569	29.295	3.15874	29.295	29.2902	29.295	17.9692	29.2854	29.295	29.295	29.2902	29.2854	8.80869
	29.3173	0.976615	29.33	22.7789	29.327	2.98299	29.327	29.3222	29.327	17.4206	29.3173	29.327	29.327	29.3222	29.3173	8.29638
	29.3493	0.616238	29.36	22.6298	29.3589	2.76166	29.3589	29.3541	29.3589	16.8449	29.3493	29.3589	29.3589	29.3541	29.3493	7.91071
	29.3812	0.262517	29.39	22.5453	29.3909	2.60747	29.3909	29.386	29.3909	16.2963	29.3812	29.3909	29.3909	29.386	29.3812	7.5525
	29.4131	-0.0576299	29.42	22.4504	29.4228	2.39306	29.4228	29.418	29.4228	15.8628	29.4131	29.4228	29.4228	29.418	29.4131	7.20861
	29.4451	-0.377193	29.45	22.5333	29.4548	2.21161	29.4548	29.4499	29.4548	15.4767	29.4451	29.4548	29.4548	29.4499	29.4451	7.0119
	29.477	-0.697048	29.49	22.6389	29.4867	2.09078	29.4867	29.4819	29.4867	15.0974	29.477	29.4867	29.4867	29.4819	29.477	6.83526
	29.5089	-0.989694	29.52	22.8612	29.5187	1.9439	29.5187	29.5138	29.5187	14.7452	29.5089	29.5187	29.5187	29.5138	29.5089	6.70862
	29.5409	-1.2612	29.55	23.1884	29.5506	1.7889	29.5506	29.5457	29.5506	14.5014	29.5409	29.5506	29.5506	29.5457	29.5409	6.66569
	29.5728	-1.45774	29.58	23.5664	29.5826	1.69247	29.5826	29.5777	29.5826	14.3117	29.5728	29.5826	29.5826	29.5777	29.5728	6.6647
	29.6047	-1.65428	29.61	24.0104	29.6145	1.63755	29.6145	29.6096	29.6145	14.1627	29.6047	29.6145	29.6145	29.6096	29.6047	6.73393
	29.6367	-1.81058	29.65	24.4872	29.6465	1.56961	29.6465	29.6416	29.6465	14.095	29.6367	29.6465	29.6465	29.6416	29.6367	6.85941
	29.6686	-1.87919	29.68	25.0629	29.6784	1.52282	29.6784	29.6735	29.6784	14.0611	29.6686	29.6784	29.6784	29.6735	29.6686	7.00545
	29.7006	-1.95446	29.71	25.6984	29.7104	1.48946	29.7104	29.7055	29.7104	14.0882	29.7006	29.7104	29.7104	29.7055	29.7006	7.22188
	29.7325	-2.00193	29.74	26.3475	29.7423	1.50329	29.7423	29.7374	29.7423	14.1966	29.7325	29.7423	29.7423	29.7374	29.7325	7.52119
	29.7644	-1.96806	29.77	27.0625	29.7742	1.53584	29.7742	29.7693	29.7742	14.3388	29.7644	29.7742	29.7742	29.7693	29.7644	7.86968
	29.7964	-1.85227	29.81	27.7893	29.8062	1.60175	29.8062	29.8013	29.8062	14.5488	29.7964	29.8062	29.8062	29.8013	29.7964	8.23297
	29.8283	-1.72318	29.84	28.5571	29.8381	1.70183	29.8381	29.8332	29.8381	14.8333	29.8283	29.8381	29.8381	29.8332	29.8283	8.61682
	29.8602	-1.52635	29.87	29.2947	29.8701	1.79459	29.8701	29.8652	29.8701	15.1787	29.8602	29.8701	29.8701	29.8652	29.8602	9.04968
	29.8922	-1.26727	29.9	30.1113	29.902	1.95367	29.902	29.8971	29.902	15.497	29.8922	29.902	29.902	29.8971	29.8922	9.55934
	29.9241	-1.02152	29.93	30.8702	29.934	2.12129	29.934	29.929	29.934	15.8763	29.9241	29.934	29.934	29.929	29.9241	10.0547
	29.956	-0.688056	29.97	31.6305	29.9659	2.26246	29.9659	29.961	29.9659	16.3301	29.956	29.9659	29.9659	29.961	29.956	10.5783
	29.988	-0.30771	30	32.4443	29.9979	2.48989	29.9979	29.9929	29.9979	16.7297	29.988	29.9979	29.9979	29.9929	29.988	11.1434
	30.0199	0.0798762	30.03	33.1833	30.0298	2.71691	30.0298	30.0249	30.0298	17.1903	30.0199	30.0298	30.0298	30.0249	30.0199	11.6948
	30.0519	0.536069	30.06	33.8936	30.0618	2.95044	30.0618	30.0568	30.0618	17.6644	30.0519	30.0618	30.0618	30.0568	30.0519	12.1976
	30.0838	1.01947	30.09	34.5935	30.0937	3.2096	30.0937	30.0887	30.0937	18.1453	30.0838	30.0937	30.0937	30.0887	30.0838	12.7485
	30.1157	1.54223	30.13	35.2482	30.1257	3.53792	30.1257	30.1207	30.1257	18.6601	30.1157	30.1257	30.1257	30.1207	30.1157	13.3343
	30.1477	2.03924	30.16	35.8164	30.1576	3.83329	30.1576	30.1526	30.1576	19.1342	30.1477	30.1576	30.1576	30.1526	30.1477	13.8017
	30.1796	2.59732	30.19	36.3215	30.1896	4.10222	30.1896	30.1846	30.1896	19.6219	30.1796	30.1896	30.1896	30.1846	30.1796	14.2621
	30.2115	3.14816	30.22	36.7833	30.2215	4.4102	30.2215	30.2165	30.2215	20.1028	30.2115	30.2215	30.2215	30.2165	30.2115	14.7645
	30.2435	3.72043	30.25	37.1956	30.2534	4.69133	30.2534	30.2485	30.2534	20.5634	30.2435	30.2534	30.2534	30.2485	30.2435	15.2031
	30.2754	4.3254	30.29	37.5552	30.2854	4.97897	30.2854	30.2804	30.2854	20.963	30.2754	30.2854	30.2854	30.2804	30.2754	15.5443
	30.3073	4.82819	30.32	37.7261	30.3173	5.23243	30.3173	30.3123	30.3173	21.3084	30.3073	30.3173	30.3173	30.3123	30.3073	45.3622

## Sheet: Figure 3b
Circular Dichroism Wavelength Scan
	WT						A228S						P317R						F366L						R371H
	CD (mdeg)			Molar Ellipticity (deg*cm2/dmol)			CD (mdeg)			Molar Ellipticity (deg*cm2/dmol)			CD (mdeg)			Molar Ellipticity (deg*cm2/dmol)			CD (mdeg)			Molar Ellipticity (deg*cm2/dmol)			CD (mdeg)			Molar Ellipticity (deg*cm2/dmol)
Wavelength (nm)	Rep 1	Rep 2	Rep 3	Rep 1	Rep 2	Rep 3	Rep 1	Rep 2	Rep 3	Rep 1	Rep 2	Rep 3	Rep 1	Rep 2	Rep 3	Rep 1	Rep 2	Rep 3	Rep 1	Rep 2	Rep 3	Rep 1	Rep 2	Rep 3	Rep 1	Rep 2	Rep 3	Rep 1	Rep 2	Rep 3
260	-0.192087	-0.10146	-0.3657	-223.081	-124.305	-454.705	-0.041418	0.0926278	-0.237343	-48.4373	108.706	-372.695	0.387866	-0.129344	0.317364	397.943	-162.638	333.801	-0.229766	-0.18309	0.0132683	-265.916	-208.293	17.0033	-0.153981	0.413173	0.0627974	-160.442	491.793	76.1009
259.9	-0.182726	-0.100987	-0.35816	-212.21	-123.726	-445.33	-0.0395546	0.108616	-0.258406	-46.2581	127.469	-405.77	0.377129	-0.134661	0.312693	386.927	-169.324	328.888	-0.205319	-0.183457	0.000148099	-237.623	-208.71	0.189788	-0.140424	0.417393	0.0649259	-146.317	496.817	78.6803
259.8	-0.17184	-0.101304	-0.35055	-199.567	-124.114	-435.868	-0.0333681	0.121327	-0.276642	-39.0232	142.387	-434.406	0.365242	-0.142892	0.313438	374.732	-179.673	329.672	-0.179707	-0.185271	-0.0143974	-207.981	-210.774	-18.4502	-0.129301	0.418854	0.0671047	-134.727	498.556	81.3207
259.7	-0.160255	-0.0985181	-0.345764	-186.113	-120.701	-429.917	-0.0267263	0.137281	-0.299548	-31.2558	161.11	-470.375	0.352949	-0.152927	0.312541	362.119	-192.291	328.728	-0.150413	-0.188139	-0.0251655	-174.078	-214.037	-32.2494	-0.114789	0.418883	0.0699868	-119.606	498.59	84.8134
259.6	-0.146978	-0.0987448	-0.344793	-170.694	-120.979	-428.71	-0.0178665	0.161076	-0.322167	-20.8944	189.035	-505.893	0.335513	-0.165963	0.314391	344.23	-208.683	330.674	-0.116558	-0.18682	-0.0380425	-134.897	-212.536	-48.7512	-0.0982486	0.415202	0.0783789	-102.371	494.209	94.9833
259.5	-0.132718	-0.0967726	-0.342315	-154.133	-118.562	-425.629	-0.0107092	0.18389	-0.345602	-12.5241	215.809	-542.692	0.320444	-0.178994	0.310619	328.77	-225.068	326.707	-0.0826524	-0.185317	-0.0522939	-95.6566	-210.826	-67.0143	-0.0842128	0.408148	0.0854868	-87.7466	485.812	103.597
259.4	-0.115465	-0.098343	-0.339666	-134.096	-120.486	-422.335	-0.00603018	0.201295	-0.360875	-7.05215	236.236	-566.675	0.301941	-0.193389	0.305624	309.786	-243.168	321.453	-0.0542561	-0.180973	-0.0673279	-62.7925	-205.884	-86.2803	-0.0682106	0.400502	0.0952097	-71.0729	476.711	115.38
259.3	-0.0973254	-0.100133	-0.339251	-113.029	-122.679	-421.819	0.00124146	0.217924	-0.37212	1.45186	255.751	-584.333	0.286545	-0.198337	0.290136	293.99	-249.39	305.163	-0.028603	-0.185092	-0.0855301	-33.1033	-210.57	-109.606	-0.0540694	0.384908	0.0990472	-56.3383	458.15	120.03
259.2	-0.0793525	-0.108094	-0.341794	-92.1564	-132.433	-424.981	0.0128222	0.237018	-0.380482	14.9952	278.159	-597.464	0.275852	-0.196422	0.279054	283.019	-246.982	293.507	-0.00367403	-0.190841	-0.104252	-4.25209	-217.111	-133.598	-0.0426963	0.368717	0.102941	-44.4879	438.878	124.749
259.1	-0.0608199	-0.118177	-0.346854	-70.6334	-144.786	-431.272	0.0237503	0.259261	-0.390303	27.7754	304.263	-612.886	0.267207	-0.194273	0.272703	274.149	-244.28	286.827	0.0143894	-0.192141	-0.115748	16.6534	-218.59	-148.33	-0.0405186	0.353886	0.0990283	-42.2189	421.225	120.007
259	-0.0428876	-0.128355	-0.35056	-49.8077	-157.256	-435.88	0.031978	0.273054	-0.399306	37.3975	320.45	-627.023	0.259371	-0.192432	0.263157	266.11	-241.965	276.787	0.0285331	-0.194516	-0.127323	33.0224	-221.292	-163.164	-0.0394211	0.337469	0.0891698	-41.0753	401.684	108.06
258.9	-0.0301844	-0.13578	-0.350806	-35.0548	-166.353	-436.186	0.03861	0.28546	-0.402218	45.1535	335.01	-631.596	0.246847	-0.19052	0.259499	253.26	-239.561	272.939	0.0401174	-0.190862	-0.132137	46.4293	-217.135	-169.333	-0.0351987	0.320881	0.075049	-36.6757	381.94	90.948
258.8	-0.0185081	-0.147061	-0.348953	-21.4945	-180.174	-433.882	0.0481032	0.300224	-0.404413	56.2555	352.337	-635.042	0.235773	-0.192082	0.253876	241.899	-241.525	267.025	0.0538159	-0.181929	-0.136465	62.2831	-206.972	-174.879	-0.0290958	0.300625	0.0609401	-30.3167	357.829	73.8501
258.7	-0.0103746	-0.156899	-0.34881	-12.0486	-192.227	-433.704	0.0586344	0.314194	-0.406866	68.5715	368.731	-638.894	0.224231	-0.197803	0.248906	230.057	-248.719	261.797	0.0641306	-0.174713	-0.141014	74.2206	-198.763	-180.709	-0.0208751	0.271791	0.0431485	-21.7511	323.509	52.2894
258.6	0.00326692	-0.165959	-0.342663	3.79405	-203.327	-426.061	0.0664672	0.319001	-0.407167	77.7318	374.373	-639.367	0.211349	-0.208985	0.241805	216.84	-262.779	254.329	0.0641527	-0.168377	-0.146814	74.2462	-191.555	-188.141	-0.0113057	0.243256	0.0364491	-11.7801	289.544	44.1708
258.5	0.0214686	-0.169235	-0.332317	24.9326	-207.341	-413.197	0.066736	0.322133	-0.397088	78.0461	378.049	-623.54	0.201168	-0.212079	0.225942	206.395	-266.669	237.644	0.0595786	-0.161196	-0.155227	68.9524	-183.385	-198.923	-0.0090366	0.211268	0.0312627	-9.4158	251.469	37.8856
258.4	0.0312517	-0.177569	-0.322888	36.2943	-217.551	-401.473	0.0695547	0.324702	-0.381821	81.3425	381.063	-599.567	0.196537	-0.20834	0.207865	201.643	-261.968	218.631	0.0509545	-0.157306	-0.160835	58.9715	-178.96	-206.109	-0.00585453	0.187474	0.0236382	-6.1002	223.147	28.6459
258.3	0.0451815	-0.191108	-0.318412	52.4717	-234.139	-395.908	0.0732535	0.320973	-0.367577	85.6682	376.687	-577.199	0.188206	-0.20525	0.197916	193.096	-258.083	208.167	0.0410352	-0.159437	-0.164101	47.4915	-181.384	-210.294	-0.00817111	0.167591	0.0193082	-8.51399	199.481	23.3986
258.2	0.0597262	-0.210213	-0.310398	69.3633	-257.546	-385.944	0.0752604	0.320958	-0.348924	88.0152	376.67	-547.909	0.191117	-0.200936	0.189616	196.083	-252.658	199.437	0.0300555	-0.155608	-0.167122	34.7843	-177.028	-214.166	-0.0154403	0.146108	0.0011907	-16.0882	173.91	1.44295
258.1	0.0733217	-0.230148	-0.304148	85.1525	-281.969	-378.172	0.0841124	0.31863	-0.325308	98.3674	373.937	-510.825	0.192701	-0.194137	0.185353	197.708	-244.109	194.953	0.0167933	-0.149458	-0.16797	19.4355	-170.031	-215.253	-0.0219695	0.12469	-0.0207801	-22.8914	148.417	-25.1823
258	0.0889018	-0.246791	-0.295559	103.246	-302.36	-367.493	0.0952999	0.312959	-0.300316	111.451	367.282	-471.581	0.188	-0.187053	0.180259	192.885	-235.202	189.595	-0.00333078	-0.156357	-0.167301	-3.85483	-177.88	-214.395	-0.0211563	0.106801	-0.0445197	-22.0441	127.124	-53.9511
257.9	0.106301	-0.265674	-0.28764	123.453	-325.494	-357.647	0.11662	0.314584	-0.274911	136.384	369.189	-431.688	0.18214	-0.191979	0.176876	186.872	-241.396	186.037	-0.024339	-0.163051	-0.174919	-28.1684	-185.495	-224.158	-0.017	0.0899552	-0.0779188	-17.7134	107.072	-94.4257
257.8	0.126462	-0.277975	-0.280775	146.867	-340.565	-349.111	0.138313	0.315365	-0.248522	161.754	370.106	-390.25	0.179136	-0.192107	0.179692	183.79	-241.556	188.999	-0.0425672	-0.171103	-0.181461	-49.2645	-194.656	-232.541	-0.0170191	0.0734872	-0.10368	-17.7333	87.4707	-125.644
257.7	0.141814	-0.278769	-0.269494	164.696	-341.538	-335.084	0.157226	0.30697	-0.225332	183.872	360.254	-353.835	0.168853	-0.196672	0.192907	173.24	-247.297	202.898	-0.0564733	-0.169819	-0.186572	-65.3586	-193.195	-239.091	-0.0227242	0.0548986	-0.121072	-23.6778	65.345	-146.721
257.6	0.158195	-0.276804	-0.256024	183.72	-339.131	-318.336	0.167255	0.293787	-0.199026	195.601	344.782	-312.527	0.166729	-0.204423	0.192087	171.061	-257.043	202.036	-0.0745023	-0.16476	-0.188773	-86.2242	-187.44	-241.912	-0.020931	0.0396069	-0.133675	-21.8093	47.1435	-161.994
257.5	0.173554	-0.280445	-0.242359	201.558	-343.591	-301.345	0.180973	0.282687	-0.175496	211.643	331.756	-275.578	0.167524	-0.21521	0.190306	171.877	-270.606	200.162	-0.0853095	-0.156412	-0.192496	-98.7317	-177.943	-246.683	-0.0178241	0.0217581	-0.148598	-18.572	25.8983	-180.078
257.4	0.186071	-0.281001	-0.229674	216.094	-344.273	-285.573	0.201942	0.264961	-0.149068	236.166	310.953	-234.079	0.16976	-0.223212	0.203002	174.171	-280.668	213.516	-0.0917849	-0.149886	-0.196107	-106.226	-170.518	-251.31	-0.0114398	0.00734673	-0.160778	-11.9198	8.7447	-194.838
257.3	0.200007	-0.278901	-0.220714	232.279	-341.7	-274.432	0.21651	0.252614	-0.129897	253.203	296.462	-203.975	0.171077	-0.229169	0.20461	175.522	-288.158	215.207	-0.0968239	-0.146442	-0.197705	-112.058	-166.6	-253.358	-0.00796088	-0.00104214	-0.176401	-8.29494	-1.24044	-213.771
257.2	0.21415	-0.274784	-0.213052	248.704	-336.656	-264.905	0.230154	0.242078	-0.102719	269.159	284.098	-161.298	0.16243	-0.234743	0.206027	166.65	-295.167	216.698	-0.105248	-0.146731	-0.205001	-121.807	-166.929	-262.708	-0.00879954	-0.00194339	-0.1946	-9.16879	-2.31319	-235.826
257.1	0.225111	-0.267091	-0.199719	261.434	-327.231	-248.327	0.244953	0.218527	-0.0762055	286.467	256.459	-119.664	0.157962	-0.236229	0.206527	162.066	-297.036	217.224	-0.119525	-0.145519	-0.210511	-138.331	-165.55	-269.769	-0.0111129	0.00388477	-0.215447	-11.5792	4.62398	-261.089
257	0.239329	-0.256532	-0.189139	277.946	-314.294	-235.172	0.257497	0.203706	-0.0515987	301.136	239.065	-81.0245	0.150883	-0.241961	0.210473	154.803	-304.243	221.374	-0.133493	-0.140092	-0.210609	-154.496	-159.376	-269.894	-0.0135629	0.0186251	-0.23387	-14.132	22.1692	-283.415
256.9	0.247677	-0.241435	-0.18233	287.641	-295.798	-226.706	0.26747	0.195099	-0.0379453	312.8	228.964	-59.5848	0.148386	-0.24753	0.217524	152.241	-311.246	228.79	-0.142568	-0.133733	-0.206151	-164.999	-152.142	-264.181	-0.0147336	0.0326763	-0.253371	-15.3519	38.8941	-307.047
256.8	0.254976	-0.219781	-0.168987	296.117	-269.268	-210.116	0.277151	0.186611	-0.0239192	324.121	219.003	-37.5599	0.136601	-0.261828	0.230765	140.15	-329.224	242.717	-0.149287	-0.11723	-0.198878	-172.775	-133.367	-254.861	-0.0164104	0.05492	-0.267292	-17.099	65.3704	-323.917
256.7	0.264447	-0.192972	-0.150493	307.117	-236.423	-187.12	0.285667	0.179477	-0.00893316	334.081	210.63	-14.0276	0.121893	-0.288065	0.238047	125.06	-362.215	250.376	-0.157937	-0.0950055	-0.187319	-182.786	-108.083	-240.048	-0.009484	0.0766197	-0.282338	-9.88197	91.1993	-342.151
256.6	0.273447	-0.163872	-0.132856	317.569	-200.77	-165.191	0.291908	0.172534	0.00620153	341.379	202.482	9.73815	0.100496	-0.31172	0.233377	103.107	-391.959	245.464	-0.16329	-0.0706207	-0.187854	-188.981	-80.3419	-240.734	0.0106337	0.0975392	-0.291362	11.0799	116.099	-353.086
256.5	0.287591	-0.133448	-0.117795	333.995	-163.496	-146.464	0.297563	0.172467	0.0185646	347.993	202.404	29.1517	0.0792165	-0.334871	0.231404	81.2747	-421.069	243.389	-0.165674	-0.0440721	-0.188386	-191.74	-50.1388	-241.416	0.034173	0.113461	-0.291611	35.607	135.051	-353.388
256.4	0.301738	-0.0981586	-0.104309	350.425	-120.26	-129.696	0.301005	0.167771	0.0247289	352.018	196.893	38.8313	0.0657561	-0.355773	0.224064	67.4645	-447.351	235.669	-0.16389	-0.0188717	-0.195871	-189.676	-21.4694	-251.008	0.0530575	0.123314	-0.285526	55.2839	146.779	-346.014
256.3	0.308995	-0.0556087	-0.0926786	358.853	-68.1298	-115.235	0.30032	0.161565	0.0327135	351.217	189.609	51.3694	0.055484	-0.370507	0.215489	56.9256	-465.878	226.65	-0.165788	0.00155102	-0.198773	-191.872	1.76452	-254.726	0.067207	0.133309	-0.277284	70.0272	158.676	-336.026
256.2	0.318389	-0.0157494	-0.0758686	369.762	-19.2956	-94.3337	0.296498	0.15512	0.0375545	346.747	182.046	58.9711	0.0426885	-0.384375	0.205945	43.7976	-483.315	216.611	-0.173034	0.0240288	-0.198552	-200.258	27.3364	-254.443	0.0736316	0.15203	-0.26654	76.7214	180.959	-323.006
256.1	0.315017	0.0177959	-0.0622742	365.846	21.8029	-77.4307	0.292633	0.153662	0.0414223	342.227	180.334	65.0447	0.0335845	-0.400863	0.189334	34.4571	-504.048	199.14	-0.186399	0.0547513	-0.191808	-215.726	62.288	-245.801	0.0829535	0.170187	-0.261322	86.4344	202.571	-316.682
256	0.308435	0.0449607	-0.06301	358.202	55.0843	-78.3456	0.290073	0.159838	0.0412731	339.233	187.583	64.8104	0.0175773	-0.415729	0.168548	18.034	-522.74	177.278	-0.196962	0.0781605	-0.182561	-227.951	88.9195	-233.951	0.0944204	0.184996	-0.260242	98.3825	220.198	-315.374
255.9	0.303298	0.0846386	-0.066434	352.236	103.696	-82.6029	0.291467	0.175712	0.0390471	340.864	206.212	61.3149	-0.005666	-0.435793	0.157891	-5.81321	-547.969	166.069	-0.212156	0.108393	-0.18463	-245.536	123.314	-236.602	0.0956956	0.201648	-0.258423	99.7112	240.019	-313.169
255.8	0.30228	0.12102	-0.0686761	351.054	148.269	-85.3907	0.284366	0.200925	0.0343126	332.559	235.801	53.8804	-0.0268624	-0.448289	0.142989	-27.5603	-563.681	150.395	-0.228717	0.137368	-0.181672	-264.702	156.277	-232.812	0.0954243	0.20817	-0.261595	99.4286	247.782	-317.013
255.7	0.307675	0.152892	-0.0670571	357.32	187.318	-83.3777	0.28428	0.219188	0.0252804	332.459	257.234	39.6973	-0.0518419	-0.464624	0.131566	-53.1888	-584.221	138.38	-0.243351	0.166692	-0.186142	-281.639	189.638	-238.54	0.0962148	0.218247	-0.25741	100.252	259.776	-311.942
255.6	0.313028	0.184511	-0.06387	363.536	226.056	-79.4149	0.277414	0.234208	0.013745	324.429	274.862	21.5835	-0.0664019	-0.477162	0.12034	-68.1271	-599.986	126.573	-0.251676	0.197872	-0.192095	-291.274	225.11	-246.169	0.101341	0.22053	-0.247798	105.594	262.493	-300.293
255.5	0.313633	0.210232	-0.0597855	364.239	257.569	-74.3363	0.271245	0.252537	-0.00254145	317.214	296.372	-3.99079	-0.0768302	-0.495111	0.102727	-78.8264	-622.556	108.047	-0.254846	0.233717	-0.197285	-294.942	265.889	-252.82	0.104587	0.215754	-0.230136	108.976	256.809	-278.89
255.4	0.3022	0.23043	-0.0618039	350.961	282.315	-76.8459	0.262631	0.270811	-0.0154479	307.141	317.818	-24.2576	-0.0839187	-0.50395	0.0893502	-86.099	-633.67	93.9779	-0.258045	0.267475	-0.201063	-298.645	304.294	-257.661	0.10699	0.204601	-0.214228	111.48	243.533	-259.612
255.3	0.285497	0.247464	-0.0609653	331.563	303.184	-75.8032	0.259086	0.281277	-0.0324609	302.995	330.101	-50.9728	-0.101066	-0.516955	0.0797075	-103.692	-650.022	83.8357	-0.263333	0.304147	-0.20481	-304.765	346.014	-262.463	0.108845	0.192871	-0.202049	113.412	229.571	-244.853
255.2	0.272849	0.259051	-0.0674236	316.874	317.38	-83.8334	0.253532	0.29227	-0.0535738	296.499	343.002	-84.126	-0.110408	-0.524749	0.0629335	-113.277	-659.823	66.193	-0.266041	0.336858	-0.212007	-307.899	383.228	-271.686	0.110555	0.174593	-0.197835	115.194	207.815	-239.746
255.1	0.257589	0.265953	-0.0709168	299.152	325.836	-88.1767	0.249786	0.30668	-0.075424	292.119	359.913	-118.437	-0.12331	-0.532973	0.0536426	-126.514	-670.163	56.4209	-0.263961	0.365824	-0.21955	-305.491	416.181	-281.352	0.11299	0.149165	-0.190937	117.731	177.549	-231.387
255	0.234941	0.278281	-0.0730812	272.85	340.94	-90.8679	0.245561	0.323596	-0.0941075	287.178	379.765	-147.775	-0.135732	-0.535108	0.0438581	-139.259	-672.848	46.1296	-0.262758	0.388348	-0.220205	-304.099	441.805	-282.191	0.106678	0.130352	-0.17955	111.154	155.156	-217.587
254.9	0.208852	0.287601	-0.0689167	242.551	352.359	-85.6898	0.241483	0.335867	-0.112845	282.408	394.166	-177.198	-0.147048	-0.536329	0.0317936	-150.869	-674.383	33.4403	-0.265941	0.410265	-0.224551	-307.783	466.739	-287.761	0.100882	0.116941	-0.166113	105.115	139.193	-201.304
254.8	0.176618	0.291464	-0.0657405	205.116	357.091	-81.7406	0.243268	0.349594	-0.127165	284.496	410.276	-199.685	-0.160192	-0.536804	0.0259252	-164.354	-674.981	27.2679	-0.270827	0.434449	-0.227162	-313.438	494.252	-291.107	0.100086	0.104545	-0.144899	104.286	124.438	-175.596
254.7	0.143034	0.291307	-0.0583931	166.113	356.899	-72.605	0.246103	0.353083	-0.1439	287.811	414.371	-225.964	-0.161309	-0.533172	0.0263216	-165.5	-670.414	27.6849	-0.271436	0.464538	-0.228471	-314.143	528.483	-292.784	0.096719	0.0849085	-0.124043	100.778	101.065	-150.321
254.6	0.111285	0.288098	-0.0503209	129.241	352.968	-62.5681	0.243405	0.365243	-0.157661	284.656	428.641	-247.572	-0.159075	-0.53234	0.0240378	-163.208	-669.368	25.2828	-0.266578	0.489076	-0.223148	-308.52	556.399	-285.963	0.0902122	0.0605685	-0.106048	93.9977	72.0938	-128.514
254.5	0.0731862	0.283081	-0.0446314	84.9951	346.821	-55.4939	0.246221	0.365693	-0.167111	287.949	429.17	-262.411	-0.160517	-0.527793	0.0291004	-164.687	-663.65	30.6076	-0.26288	0.507685	-0.225996	-304.24	577.569	-289.613	0.0897891	0.0283323	-0.0890632	93.5569	33.7235	-107.931
254.4	0.0410158	0.276425	-0.0326502	47.6339	338.666	-40.5967	0.255796	0.362977	-0.172897	299.147	425.982	-271.497	-0.162166	-0.518341	0.0345444	-166.379	-651.765	36.3335	-0.259942	0.518868	-0.22838	-300.84	590.292	-292.668	0.0866779	0.00209278	-0.0702643	90.3151	2.491	-85.1496
254.3	0.00626876	0.266449	-0.0212799	7.28025	326.444	-26.4591	0.261274	0.354657	-0.18069	305.554	416.218	-283.734	-0.163488	-0.508194	0.0430894	-167.736	-639.006	45.3211	-0.259954	0.529865	-0.230989	-300.854	602.803	-296.011	0.0920218	-0.0239286	-0.0438588	95.8833	-28.4818	-53.1502
254.2	-0.0389576	0.256841	-0.00979599	-45.2436	314.673	-12.1802	0.270817	0.337555	-0.192708	316.714	396.147	-302.606	-0.159034	-0.49142	0.0483411	-163.166	-617.914	50.8448	-0.255507	0.540908	-0.240696	-295.707	615.366	-308.451	0.096786	-0.0540408	-0.0241359	100.847	-64.3239	-29.249
254.1	-0.0870524	0.247299	0.000895243	-101.099	302.982	1.11313	0.279696	0.312703	-0.204762	327.098	366.982	-321.534	-0.148769	-0.472195	0.0600635	-152.634	-593.741	63.1743	-0.244389	0.54737	-0.24164	-282.84	622.717	-309.66	0.0955757	-0.0839076	0.00053058	99.5863	-99.8739	0.642982
254	-0.143089	0.234895	0.0109353	-166.177	287.785	13.5968	0.2905	0.294732	-0.214135	339.733	345.891	-336.252	-0.143542	-0.452253	0.0676649	-147.271	-568.666	71.1694	-0.23597	0.556337	-0.233711	-273.096	632.918	-299.499	0.0905928	-0.105492	0.0262545	94.3943	-125.566	31.8165
253.9	-0.19541	0.216034	0.0142312	-226.94	264.677	17.6948	0.303401	0.286734	-0.217387	354.82	336.505	-341.359	-0.136999	-0.436126	0.0732534	-140.558	-548.387	77.0474	-0.234064	0.562041	-0.229886	-270.891	639.408	-294.598	0.0838729	-0.118832	0.0479097	87.3924	-141.444	58.0593
253.8	-0.236185	0.194931	0.0217834	-274.294	238.823	27.0851	0.317463	0.279497	-0.221676	371.265	328.012	-348.094	-0.136117	-0.420136	0.0854301	-139.654	-528.282	89.8547	-0.226946	0.560081	-0.238363	-262.653	637.178	-305.461	0.0762576	-0.123449	0.0715796	79.4576	-146.939	86.7436
253.7	-0.2703	0.170784	0.024055	-313.914	209.239	29.9096	0.324262	0.274366	-0.221753	379.216	321.99	-348.215	-0.127353	-0.398462	0.0937006	-130.662	-501.029	98.5536	-0.214151	0.553957	-0.246321	-247.845	630.211	-315.659	0.0703555	-0.125885	0.091221	73.3078	-149.839	110.546
253.6	-0.296848	0.147582	0.0254901	-344.746	180.812	31.694	0.331833	0.273147	-0.21969	388.071	320.56	-344.975	-0.11327	-0.375861	0.105584	-116.213	-472.61	111.052	-0.192934	0.545064	-0.25305	-223.289	620.094	-324.282	0.0576667	-0.131748	0.108683	60.0865	-156.818	131.707
253.5	-0.317291	0.126079	0.0379157	-368.487	154.468	47.1437	0.34457	0.26554	-0.21559	402.966	311.632	-338.537	-0.0920323	-0.352297	0.130149	-94.4234	-442.98	136.89	-0.177602	0.543498	-0.257078	-205.545	618.312	-329.444	0.0410272	-0.132574	0.130976	42.7488	-157.801	158.723
253.4	-0.332118	0.0938018	0.0517006	-385.707	114.923	64.2836	0.362152	0.252928	-0.211697	423.528	296.831	-332.424	-0.0687537	-0.319863	0.144509	-70.54	-402.198	151.993	-0.156913	0.536524	-0.253764	-181.601	610.378	-325.197	0.0287355	-0.139136	0.15152	29.9413	-165.611	183.619
253.3	-0.346604	0.0636821	0.0655624	-402.53	78.0211	81.5192	0.387169	0.237887	-0.210749	452.785	279.179	-330.935	-0.0371988	-0.292231	0.157362	-38.1653	-367.453	165.512	-0.136559	0.533112	-0.2562	-158.045	606.496	-328.319	0.0223543	-0.143409	0.17101	23.2923	-170.698	207.238
253.2	-0.3694	0.0461416	0.0733429	-429.004	56.5311	91.1933	0.402246	0.225525	-0.207491	470.417	264.671	-325.819	-0.00897519	-0.26289	0.171087	-9.20838	-330.559	179.948	-0.11789	0.527472	-0.251945	-136.438	600.08	-322.866	0.00809772	-0.152554	0.182037	8.43752	-181.583	220.601
253.1	-0.390366	0.0316828	0.080586	-453.353	38.8167	100.199	0.416027	0.213271	-0.198869	486.533	250.29	-312.28	0.0107426	-0.234045	0.182337	11.0217	-294.29	191.781	-0.105178	0.518361	-0.253441	-121.726	589.715	-324.783	-0.00780975	-0.161768	0.19169	-8.13747	-192.55	232.299
253	-0.413422	0.024972	0.0790475	-480.129	30.5948	98.2863	0.425508	0.199491	-0.185575	497.621	234.118	-291.405	0.0393157	-0.19665	0.198143	40.3372	-247.269	208.405	-0.0879719	0.510841	-0.253744	-101.813	581.16	-325.171	-0.0228015	-0.162292	0.197005	-23.7583	-193.174	238.74
252.9	-0.428449	0.0188818	0.0817623	-497.581	23.1333	101.662	0.424376	0.189702	-0.176863	496.297	222.63	-277.725	0.0688641	-0.155583	0.203833	70.6533	-195.631	214.39	-0.0710408	0.503604	-0.249133	-82.218	572.927	-319.263	-0.0433004	-0.156559	0.209269	-45.1174	-186.35	253.602
252.8	-0.437442	0.013113	0.0852138	-508.025	16.0656	105.953	0.418019	0.182081	-0.160931	488.863	213.686	-252.707	0.0987943	-0.114978	0.197206	101.361	-144.574	207.42	-0.0595752	0.492564	-0.245695	-68.9485	560.367	-314.857	-0.060532	-0.154488	0.215358	-63.0721	-183.885	260.981
252.7	-0.443633	0.00401046	0.0920195	-515.215	4.91347	114.415	0.41322	0.18228	-0.134575	483.251	213.92	-211.321	0.130439	-0.074626	0.188809	133.828	-93.8352	198.588	-0.0513206	0.478955	-0.242471	-59.3952	544.885	-310.725	-0.0769218	-0.144526	0.222279	-80.1496	-172.027	269.368
252.6	-0.447813	0.000971304	0.0950007	-520.069	1.19001	118.122	0.404147	0.187442	-0.106225	472.64	219.978	-166.803	0.16266	-0.0331671	0.178051	166.886	-41.7045	187.273	-0.0452765	0.464825	-0.238389	-52.4001	528.81	-305.494	-0.0932163	-0.128406	0.226203	-97.1279	-152.84	274.124
252.5	-0.444391	-0.0055986	0.0986659	-516.095	-6.85921	122.679	0.394349	0.196123	-0.0799654	461.182	230.166	-125.568	0.18778	-0.0059983	0.169079	192.659	-7.5423	177.836	-0.0449933	0.4551	-0.236979	-52.0723	517.746	-303.687	-0.108842	-0.114191	0.231089	-113.409	-135.92	280.045
252.4	-0.439848	-0.00282859	0.100359	-510.819	-3.46549	124.785	0.380042	0.202402	-0.0491376	444.45	237.535	-77.1599	0.213829	0.0178066	0.160579	219.385	22.3901	168.896	-0.044194	0.443488	-0.238482	-51.1473	504.535	-305.613	-0.129557	-0.106608	0.229671	-134.994	-126.894	278.326
252.3	-0.431852	-0.000483151	0.111165	-501.533	-0.59194	138.221	0.359649	0.20002	-0.0190605	420.601	234.739	-29.9304	0.240291	0.0504095	0.156281	246.534	63.3852	164.375	-0.0398858	0.430456	-0.237623	-46.1613	489.71	-304.513	-0.14798	-0.097834	0.223452	-154.19	-116.45	270.79
252.2	-0.420573	-0.00250328	0.119989	-488.434	-3.06693	149.192	0.340496	0.197618	0.0059839	398.202	231.92	9.39641	0.262437	0.0782687	0.141861	269.256	98.4155	149.208	-0.038514	0.420731	-0.231552	-44.5736	478.646	-296.733	-0.164032	-0.0982606	0.221565	-170.915	-116.958	268.503
252.1	-0.412507	-0.000300708	0.127392	-479.067	-0.368417	158.397	0.321948	0.198054	0.0269598	376.51	232.432	42.3345	0.284555	0.106167	0.12953	291.948	133.495	136.239	-0.043061	0.408774	-0.238237	-49.836	465.043	-305.299	-0.176011	-0.0981897	0.218154	-183.397	-116.874	264.369
252	-0.399725	-0.00139882	0.141152	-464.222	-1.71379	175.506	0.299572	0.199398	0.0496381	350.342	234.009	77.9458	0.307051	0.132276	0.113792	315.029	166.325	119.686	-0.0540057	0.394528	-0.238944	-62.5027	448.836	-306.205	-0.186121	-0.0969645	0.211646	-193.931	-115.415	256.483
251.9	-0.386006	0.00117933	0.150682	-448.29	1.44487	187.355	0.276215	0.203041	0.0724604	323.027	238.285	113.783	0.322996	0.159258	0.0927309	331.388	200.252	97.5337	-0.064415	0.379304	-0.245825	-74.5498	431.516	-315.023	-0.191423	-0.103631	0.203987	-199.456	-123.35	247.201
251.8	-0.365021	0.000734763	0.157976	-423.919	0.900206	196.425	0.250499	0.209989	0.0966928	292.952	246.439	151.835	0.340503	0.177623	0.0774584	349.35	223.344	81.4702	-0.0784797	0.362095	-0.253141	-90.8274	411.938	-324.399	-0.199404	-0.104525	0.192714	-207.772	-124.415	233.54
251.7	-0.334578	0.00159286	0.154093	-388.564	1.95152	191.597	0.21998	0.222035	0.122533	257.261	260.576	192.411	0.342652	0.192561	0.0670512	351.555	242.127	70.5239	-0.104075	0.342559	-0.25686	-120.45	389.713	-329.165	-0.217228	-0.102102	0.18754	-226.343	-121.53	227.27
251.6	-0.296838	0.00564854	0.15858	-344.734	6.92039	197.176	0.19397	0.231647	0.145342	226.843	271.856	228.228	0.344956	0.200853	0.0565946	353.919	252.554	59.5258	-0.132483	0.32217	-0.262357	-153.327	366.518	-336.209	-0.231537	-0.106403	0.177779	-241.253	-126.65	215.441
251.5	-0.259251	0.00677389	0.165867	-301.082	8.29913	206.236	0.167887	0.245694	0.167767	196.34	288.341	263.441	0.350556	0.209375	0.0455871	359.664	263.269	47.9482	-0.155091	0.296307	-0.272489	-179.492	337.095	-349.193	-0.24408	-0.106365	0.157737	-254.322	-126.605	191.153
251.4	-0.219535	0.00721582	0.179582	-254.958	8.84057	223.289	0.14088	0.255122	0.185609	164.756	299.406	291.458	0.345821	0.219008	0.041857	354.806	275.382	44.0249	-0.17609	0.266169	-0.276819	-203.795	302.808	-354.742	-0.247739	-0.109399	0.13741	-258.135	-130.216	166.52
251.3	-0.183727	0.00181122	0.185144	-213.372	2.21904	230.205	0.117748	0.25829	0.207487	137.703	303.124	325.813	0.33867	0.222172	0.038152	347.469	279.36	40.128	-0.199504	0.243205	-0.274968	-230.893	276.683	-352.37	-0.246053	-0.11616	0.107101	-256.378	-138.263	129.79
251.2	-0.15109	0.000831046	0.196055	-175.469	1.01817	243.771	0.108059	0.262144	0.221646	126.372	307.647	348.047	0.328599	0.218238	0.0462307	337.137	274.414	48.6251	-0.217223	0.223849	-0.273557	-251.4	254.663	-350.562	-0.243306	-0.130456	0.0770994	-253.516	-155.28	93.4327
251.1	-0.120288	-0.00134214	0.204555	-139.697	-1.64434	254.34	0.0943556	0.262766	0.233467	110.347	308.377	366.609	0.316791	0.215319	0.0628878	325.022	270.743	66.1449	-0.234136	0.209838	-0.267137	-270.974	238.723	-342.335	-0.240861	-0.138784	0.0488626	-250.968	-165.192	59.214
251	-0.094589	0.00274688	0.2119	-109.851	3.36538	263.473	0.0784635	0.25782	0.242401	91.7611	302.572	380.638	0.30109	0.209079	0.0735002	308.913	262.897	77.307	-0.248366	0.19265	-0.261288	-287.443	219.169	-334.839	-0.231205	-0.152958	0.0157296	-240.907	-182.064	19.0619
250.9	-0.0714877	0.012977	0.219939	-83.0225	15.899	273.468	0.0553245	0.246626	0.247865	64.7006	289.435	389.218	0.276965	0.198646	0.0909578	284.161	249.779	95.6687	-0.266194	0.177539	-0.255871	-308.076	201.978	-327.897	-0.225998	-0.167273	-0.00727119	-235.481	-199.102	-8.81158
250.8	-0.0537667	0.0285473	0.224771	-62.4422	34.9751	279.476	0.0320671	0.23233	0.255489	37.5017	272.658	401.19	0.242986	0.18361	0.106209	249.299	230.872	111.71	-0.286187	0.158759	-0.246077	-331.214	180.613	-315.346	-0.224336	-0.173251	-0.0307808	-233.75	-206.218	-37.3016
250.7	-0.0291645	0.0291423	0.232399	-33.8703	35.7041	288.961	0.0170174	0.222633	0.253899	19.9014	261.277	398.693	0.208681	0.168122	0.113916	214.103	211.398	119.816	-0.300311	0.145873	-0.233662	-347.561	165.953	-299.437	-0.213516	-0.180915	-0.0534971	-222.476	-215.34	-64.8303
250.6	-0.0103297	0.0259471	0.234773	-11.9964	31.7895	291.913	0.00473029	0.217668	0.252083	5.53196	255.451	395.841	0.17974	0.145837	0.119712	184.41	183.376	125.912	-0.315932	0.132062	-0.216575	-365.639	150.241	-277.54	-0.201331	-0.190121	-0.0859815	-209.779	-226.298	-104.196
250.5	0.0100753	0.0194853	0.244906	11.701	23.8727	304.512	-0.00629767	0.212007	0.250564	-7.36497	248.807	393.456	0.145314	0.118095	0.128735	149.089	148.493	135.403	-0.332634	0.124178	-0.200952	-384.969	141.271	-257.519	-0.19196	-0.197165	-0.114242	-200.015	-234.682	-138.444
250.4	0.0296175	0.0219546	0.253951	34.3964	26.898	315.758	-0.00685965	0.199775	0.246568	-8.02219	234.452	387.181	0.103138	0.0839684	0.142805	105.818	105.582	150.201	-0.343572	0.117156	-0.1838	-397.628	133.283	-235.539	-0.17621	-0.204524	-0.138815	-183.604	-243.442	-168.223
250.3	0.0461855	0.0225558	0.252856	53.6377	27.6346	314.397	-0.0113489	0.184988	0.235937	-13.2723	217.098	370.488	0.0718532	0.0542279	0.163853	73.7201	68.1865	172.339	-0.347632	0.112368	-0.167266	-402.327	127.836	-214.35	-0.166183	-0.200497	-0.156222	-173.156	-238.649	-189.317
250.2	0.0581741	0.0257752	0.252339	67.5607	31.5789	313.754	-0.0153335	0.1663	0.21991	-17.9322	195.166	345.321	0.0369866	0.0210815	0.181842	37.9476	26.508	191.26	-0.351024	0.110642	-0.14814	-406.253	125.872	-189.841	-0.156726	-0.20019	-0.174848	-163.303	-238.283	-211.889
250.1	0.0687253	0.0236252	0.253756	79.8144	28.9448	315.516	-0.0145921	0.140568	0.200487	-17.0651	164.968	314.821	0.00620533	-0.0107519	0.200927	6.36655	-13.5195	211.334	-0.345584	0.10468	-0.13226	-399.957	119.09	-169.49	-0.150403	-0.20363	-0.196964	-156.714	-242.378	-238.69
250	0.0738839	0.0165782	0.250651	85.8054	20.311	311.655	-0.00190443	0.115067	0.181942	-2.22718	135.04	285.7	-0.0185944	-0.0345797	0.219646	-19.0775	-43.4807	231.022	-0.341566	0.0991857	-0.11192	-395.307	112.839	-143.425	-0.137588	-0.199475	-0.213237	-143.362	-237.432	-258.411
249.9	0.0858145	0.000703036	0.242707	99.661	0.861335	301.778	0.00817426	0.0907761	0.159667	9.5596	106.533	250.722	-0.0502215	-0.0561244	0.243152	-51.5263	-70.5712	255.745	-0.333467	0.0894787	-0.085831	-385.933	101.796	-109.992	-0.125998	-0.196016	-0.213149	-131.285	-233.315	-258.304
249.8	0.0950496	-0.0160933	0.231669	110.386	-19.7169	288.053	0.0230392	0.0708806	0.131747	26.9438	83.184	206.88	-0.0795931	-0.0870041	0.256066	-81.6611	-109.399	269.328	-0.332051	0.0856097	-0.0688822	-384.294	97.3941	-88.2721	-0.1251	-0.20353	-0.206522	-130.35	-242.259	-250.273
249.7	0.102021	-0.0273056	0.231326	118.483	-33.4539	287.627	0.0361926	0.0572093	0.107216	42.3264	67.1396	168.359	-0.107409	-0.120885	0.269128	-110.2	-152.002	283.067	-0.332769	0.0837979	-0.0589451	-385.125	95.3329	-75.5378	-0.120817	-0.198536	-0.198107	-125.887	-236.314	-240.076
249.6	0.116989	-0.0377911	0.228618	135.866	-46.3003	284.26	0.048962	0.028202	0.0857936	57.2599	33.0973	134.72	-0.139828	-0.152122	0.27877	-143.461	-191.279	293.208	-0.326275	0.0845382	-0.042296	-377.61	96.1751	-54.2021	-0.121103	-0.189837	-0.187388	-126.185	-225.96	-227.086
249.5	0.124885	-0.0537002	0.221163	145.036	-65.7916	274.99	0.0634368	0.00989199	0.0587086	74.1878	11.609	92.189	-0.164618	-0.179823	0.28666	-168.895	-226.111	301.507	-0.310296	0.0947326	-0.028853	-359.117	107.773	-36.975	-0.127844	-0.179511	-0.176484	-133.209	-213.669	-213.872
249.4	0.132487	-0.072709	0.216931	153.864	-89.0805	269.728	0.0806866	-0.00405131	0.0293142	94.361	-4.75453	46.0316	-0.180911	-0.206591	0.293	-185.611	-259.769	308.175	-0.299252	0.110183	-0.0175997	-346.335	125.35	-22.5539	-0.137275	-0.164869	-0.177525	-143.035	-196.241	-215.133
249.3	0.139109	-0.0918155	0.211733	161.555	-112.489	263.265	0.103778	-0.0203944	-0.00271172	121.366	-23.9344	-4.25816	-0.184573	-0.223079	0.29385	-189.369	-280.501	309.069	-0.280484	0.124456	-0.00186534	-324.614	141.588	-2.39042	-0.151038	-0.154825	-0.18217	-157.376	-184.286	-220.762
249.2	0.139236	-0.114971	0.211674	161.702	-140.858	263.192	0.130335	-0.0404364	-0.033527	152.424	-47.4553	-52.6468	-0.175177	-0.231215	0.292826	-179.728	-290.731	307.992	-0.26019	0.131017	0.00774173	-301.127	149.052	9.92098	-0.163448	-0.143201	-0.183635	-170.307	-170.45	-222.538
249.1	0.135892	-0.141215	0.209091	157.819	-173.012	259.98	0.153744	-0.0532048	-0.0501058	179.8	-62.44	-78.6802	-0.163514	-0.238746	0.28909	-167.762	-300.201	304.063	-0.239244	0.135267	0.0157692	-276.886	153.887	20.2081	-0.175688	-0.12375	-0.181222	-183.06	-147.298	-219.613
249	0.140418	-0.158236	0.204441	163.075	-193.865	254.198	0.177521	-0.0727157	-0.0600531	207.606	-85.3376	-94.3003	-0.153922	-0.248949	0.293256	-157.921	-313.03	308.444	-0.219956	0.141978	0.025385	-254.563	161.522	32.5307	-0.192568	-0.107131	-0.166983	-200.649	-127.516	-202.358
248.9	0.144056	-0.172468	0.19616	167.3	-211.302	243.902	0.209229	-0.0944174	-0.0731118	244.688	-110.806	-114.806	-0.143382	-0.258894	0.293205	-147.107	-325.535	308.391	-0.203475	0.15618	0.0348323	-235.489	177.679	44.6374	-0.205286	-0.090887	-0.153454	-213.9	-108.181	-185.963
248.8	0.144249	-0.181772	0.192854	167.524	-222.701	239.791	0.236933	-0.113646	-0.0916942	277.087	-133.373	-143.986	-0.134798	-0.269194	0.291191	-138.3	-338.486	306.272	-0.186515	0.170303	0.0476265	-215.86	193.746	61.0331	-0.227568	-0.0816355	-0.135144	-237.117	-97.1695	-163.774
248.7	0.138772	-0.188435	0.184783	161.163	-230.864	229.756	0.259684	-0.133633	-0.103431	303.694	-156.829	-162.416	-0.127301	-0.277834	0.27944	-130.608	-349.35	293.913	-0.170222	0.180932	0.0580105	-197.004	205.838	74.3401	-0.247777	-0.0691275	-0.113455	-258.174	-82.2814	-137.49
248.6	0.132778	-0.18974	0.181651	154.202	-232.463	225.862	0.279946	-0.151123	-0.113809	327.39	-177.355	-178.712	-0.123492	-0.28836	0.263591	-126.701	-362.586	277.243	-0.154089	0.1922	0.0638682	-178.333	218.657	81.8467	-0.263912	-0.0563631	-0.0920332	-274.986	-67.0881	-111.53
248.5	0.127455	-0.192562	0.171277	148.02	-235.92	212.963	0.295637	-0.163757	-0.116925	345.74	-192.182	-183.605	-0.119613	-0.302004	0.247589	-122.721	-379.742	260.412	-0.140926	0.207784	0.0697536	-163.099	236.386	89.3888	-0.280121	-0.0431545	-0.071483	-291.876	-51.3661	-86.6265
248.4	0.126905	-0.200572	0.160384	147.382	-245.734	199.419	0.310559	-0.178752	-0.121726	363.191	-209.78	-191.144	-0.111123	-0.315294	0.230364	-114.01	-396.453	242.295	-0.125116	0.223764	0.0750347	-144.801	254.566	96.1565	-0.292473	-0.0313286	-0.0567203	-304.746	-37.29	-68.7364
248.3	0.124473	-0.21421	0.14439	144.557	-262.443	179.532	0.321547	-0.190374	-0.12605	376.041	-223.419	-197.934	-0.0965117	-0.323527	0.214708	-99.0192	-406.805	225.828	-0.111457	0.246489	0.0708192	-128.993	280.419	90.7544	-0.301425	-0.0270792	-0.0465672	-314.074	-32.232	-56.4324
248.2	0.11845	-0.218137	0.125678	137.562	-267.254	156.266	0.327001	-0.206433	-0.119412	382.42	-242.265	-187.51	-0.0847306	-0.331362	0.202489	-86.932	-416.657	212.976	-0.10556	0.263186	0.0631383	-122.168	299.414	80.9114	-0.314954	-0.016276	-0.0320339	-328.17	-19.3731	-38.8202
248.1	0.118073	-0.216149	0.113887	137.125	-264.818	141.605	0.330292	-0.218962	-0.114111	386.268	-256.969	-179.186	-0.0739996	-0.340587	0.190625	-75.9222	-428.256	200.498	-0.0917621	0.281464	0.0613069	-106.2	320.208	78.5644	-0.330241	0.000443458	-0.00503347	-344.099	0.527841	-6.0998
248	0.116011	-0.211399	0.0984587	134.73	-258.999	122.422	0.33338	-0.22949	-0.11175	389.88	-269.325	-175.479	-0.0667061	-0.347245	0.17771	-68.4392	-436.628	186.914	-0.08095	0.289219	0.0688444	-93.6863	329.031	88.2237	-0.34514	0.00744011	0.0223391	-359.623	8.85585	27.0716
247.9	0.110135	-0.208841	0.0823706	127.906	-255.865	102.418	0.336152	-0.237009	-0.110571	393.122	-278.149	-173.628	-0.0583836	-0.351339	0.163861	-59.9005	-441.776	172.348	-0.0782223	0.294617	0.0756767	-90.5295	335.172	96.9793	-0.354848	0.0180195	0.0458416	-369.738	21.4483	55.553
247.8	0.105477	-0.203459	0.069577	122.496	-249.271	86.5109	0.340949	-0.242384	-0.110604	398.732	-284.457	-173.679	-0.0547092	-0.357428	0.14712	-56.1306	-449.432	154.74	-0.081818	0.298248	0.0753295	-94.6909	339.303	96.5343	-0.362406	0.0243975	0.0702032	-377.614	29.04	85.0756
247.7	0.101579	-0.197271	0.0602872	117.969	-241.689	74.9601	0.344729	-0.256753	-0.105263	403.152	-301.32	-165.293	-0.0610185	-0.364795	0.136314	-62.6039	-458.695	143.374	-0.0828617	0.303633	0.0706284	-95.8988	345.429	90.5099	-0.3715	0.0240624	0.101961	-387.089	28.6411	123.561
247.6	0.100494	-0.187995	0.0441114	116.709	-230.325	54.8474	0.349235	-0.258974	-0.0982717	408.422	-303.926	-154.314	-0.07371	-0.381189	0.127776	-75.6251	-479.309	134.394	-0.0906699	0.303903	0.068184	-104.936	345.736	87.3774	-0.37894	0.0229912	0.139187	-394.841	27.3661	168.673
247.5	0.106535	-0.169001	0.034996	123.725	-207.054	43.5134	0.343465	-0.26159	-0.0933046	401.674	-306.997	-146.515	-0.086807	-0.393532	0.118597	-89.0624	-494.83	124.739	-0.100875	0.305203	0.0627777	-116.746	347.215	80.4493	-0.386354	0.0164598	0.168236	-402.566	19.5918	203.876
247.4	0.108283	-0.146441	0.0265666	125.755	-179.414	33.0325	0.333332	-0.262675	-0.0931439	389.824	-308.27	-146.262	-0.10773	-0.408576	0.100333	-110.529	-513.746	105.529	-0.11356	0.311919	0.0562311	-131.427	354.856	72.0598	-0.3952	0.0042039	0.181798	-411.784	5.00384	220.312
247.3	0.10972	-0.119947	0.0162016	127.424	-146.955	20.1448	0.313092	-0.261147	-0.0991046	366.153	-306.477	-155.622	-0.130703	-0.420836	0.0913215	-134.099	-529.162	96.0513	-0.124356	0.318155	0.0471774	-143.922	361.95	60.4576	-0.395075	-0.00460209	0.192971	-411.653	-5.4778	233.851
247.2	0.11012	-0.0979456	-0.00478497	127.888	-120	-5.94955	0.291679	-0.259283	-0.109825	341.111	-304.289	-172.456	-0.154022	-0.426704	0.0860812	-158.024	-536.54	90.5396	-0.137165	0.318611	0.0421895	-158.746	362.469	54.0656	-0.399699	-0.0193646	0.199723	-416.471	-23.0494	242.034
247.1	0.105341	-0.079732	-0.0241825	122.338	-97.6848	-30.0681	0.270514	-0.249048	-0.115609	316.36	-292.277	-181.539	-0.175893	-0.435903	0.0848527	-180.463	-548.107	89.2474	-0.15493	0.314696	0.0374853	-179.306	358.015	48.0372	-0.402708	-0.0342759	0.205101	-419.607	-40.7981	248.551
247	0.0984036	-0.0562525	-0.040741	114.281	-68.9186	-50.6567	0.250594	-0.240252	-0.117882	293.064	-281.955	-185.108	-0.194777	-0.446395	0.0850842	-199.838	-561.3	89.4909	-0.181343	0.308919	0.0309347	-209.875	351.443	39.6426	-0.400508	-0.0527683	0.214125	-417.314	-62.8093	259.487
246.9	0.0862676	-0.0362408	-0.0558431	100.187	-44.401	-69.4344	0.232127	-0.241518	-0.119918	271.467	-283.44	-188.305	-0.210979	-0.465057	0.0929746	-216.461	-584.765	97.79	-0.202408	0.294878	0.0253495	-234.254	335.469	32.4852	-0.397611	-0.0674926	0.23226	-414.296	-80.3354	281.464
246.8	0.0691258	-0.013707	-0.0709299	80.2795	-16.7933	-88.193	0.216396	-0.238427	-0.120339	253.07	-279.813	-188.966	-0.234136	-0.485039	0.100591	-240.219	-609.891	105.801	-0.221866	0.282176	0.0167416	-256.773	321.018	21.4543	-0.402767	-0.086887	0.251929	-419.668	-103.42	305.3
246.7	0.0512559	0.00964899	-0.0818986	59.5263	11.8216	-101.831	0.193639	-0.229921	-0.121405	226.456	-269.83	-190.64	-0.26365	-0.50723	0.108885	-270.5	-637.794	114.524	-0.229851	0.273116	0.0196671	-266.015	310.711	25.2033	-0.40038	-0.103071	0.270462	-417.181	-122.684	327.759
246.6	0.033877	0.0384127	-0.0941871	39.3432	47.0619	-117.111	0.179729	-0.224746	-0.130819	210.189	-263.757	-205.423	-0.293103	-0.535614	0.115768	-300.718	-673.484	121.764	-0.236681	0.262285	0.0201425	-273.919	298.389	25.8125	-0.400912	-0.125589	0.292368	-417.735	-149.487	354.306
246.5	0.0160591	0.061437	-0.100695	18.6503	75.2705	-125.202	0.163832	-0.22525	-0.1444	191.598	-264.349	-226.749	-0.311105	-0.558088	0.115633	-319.188	-701.743	121.622	-0.241093	0.249511	0.0158115	-279.026	283.857	20.2623	-0.392985	-0.155164	0.305445	-409.476	-184.689	370.153
246.4	0.00265848	0.0792905	-0.106336	3.08744	97.1439	-132.216	0.140547	-0.230766	-0.161923	164.366	-270.822	-254.265	-0.324917	-0.583553	0.11093	-333.359	-733.763	116.675	-0.236171	0.226504	0.00930112	-273.329	257.683	11.9193	-0.393496	-0.180854	0.309586	-410.008	-215.268	375.171
246.3	-0.0062328	0.092387	-0.118475	-7.23849	113.189	-147.31	0.119115	-0.235346	-0.173035	139.302	-276.197	-271.714	-0.334013	-0.60807	0.106453	-342.691	-764.591	111.966	-0.239187	0.204369	-0.00640278	-276.82	232.501	-8.20513	-0.383106	-0.199631	0.308768	-399.182	-237.618	374.18
246.2	-0.0144736	0.0988756	-0.128842	-16.809	121.139	-160.2	0.0992305	-0.238923	-0.1801	116.048	-280.395	-282.808	-0.346726	-0.626363	0.104379	-355.734	-787.593	109.785	-0.244548	0.183333	-0.0211328	-283.024	208.569	-27.0816	-0.374255	-0.21927	0.311655	-389.96	-260.994	377.678
246.1	-0.0225118	0.0975494	-0.1432	-26.1442	119.514	-178.052	0.0819086	-0.246369	-0.187446	95.7901	-289.133	-294.343	-0.361252	-0.642398	0.0982271	-370.638	-807.755	103.315	-0.249366	0.153256	-0.0366799	-288.6	174.352	-47.0051	-0.366404	-0.244694	0.311759	-381.779	-291.256	377.804
246	-0.0289314	0.0922974	-0.159346	-33.5996	113.08	-198.128	0.0653494	-0.252596	-0.193699	76.4245	-296.441	-304.162	-0.366955	-0.655927	0.0933555	-376.489	-824.767	98.1906	-0.25488	0.107779	-0.0505722	-294.982	122.615	-64.808	-0.362637	-0.264296	0.30836	-377.854	-314.587	373.685
245.9	-0.0401859	0.090991	-0.173288	-46.6701	111.479	-215.463	0.0470944	-0.260031	-0.195559	55.0757	-305.167	-307.083	-0.370635	-0.666024	0.091293	-380.265	-837.463	96.0213	-0.258379	0.0640782	-0.0651567	-299.031	72.8988	-83.4979	-0.355558	-0.283193	0.302003	-370.478	-337.08	365.982
245.8	-0.052689	0.0849672	-0.185433	-61.1906	104.099	-230.564	0.0346672	-0.273667	-0.193922	40.5424	-321.17	-304.512	-0.37251	-0.68112	0.0877205	-382.188	-856.444	92.2638	-0.252485	0.0146548	-0.0744466	-292.21	16.6721	-95.4029	-0.346571	-0.300626	0.293893	-361.114	-357.831	356.154
245.7	-0.0645977	0.0824436	-0.19426	-75.0208	101.007	-241.54	0.0211686	-0.291472	-0.199599	24.7562	-342.065	-313.427	-0.361699	-0.690673	0.081933	-371.097	-868.456	86.1765	-0.243369	-0.0328909	-0.0830315	-281.66	-37.4184	-106.404	-0.337455	-0.313424	0.284194	-351.615	-373.064	344.4
245.6	-0.0817229	0.0849277	-0.20714	-94.9092	104.05	-257.554	0.0157615	-0.320133	-0.204317	18.4327	-375.701	-320.835	-0.355369	-0.694866	0.0778025	-364.602	-873.729	81.8321	-0.242871	-0.0861265	-0.0934313	-281.083	-97.9821	-119.732	-0.331912	-0.323187	0.260851	-345.84	-384.685	316.112
245.5	-0.0997331	0.0856885	-0.217494	-115.825	104.983	-270.428	0.0140018	-0.347043	-0.20017	16.3748	-407.282	-314.323	-0.343793	-0.699313	0.0735985	-352.725	-879.32	77.4103	-0.244924	-0.132816	-0.112739	-283.459	-151.099	-144.474	-0.328723	-0.33093	0.236288	-342.517	-393.901	286.345
245.4	-0.116537	0.0871747	-0.226525	-135.341	106.803	-281.657	0.00139815	-0.372232	-0.199046	1.6351	-436.844	-312.558	-0.329453	-0.70243	0.0676053	-338.013	-883.24	71.1067	-0.240848	-0.17741	-0.140729	-278.742	-201.831	-180.343	-0.325642	-0.341299	0.206732	-339.307	-406.243	250.528
245.3	-0.12872	0.0911257	-0.231446	-149.49	111.644	-287.776	-0.0113535	-0.404772	-0.198337	-13.2776	-475.032	-311.445	-0.315513	-0.70584	0.063902	-323.711	-887.527	67.2116	-0.23725	-0.228699	-0.16516	-274.578	-260.18	-211.652	-0.321418	-0.359647	0.172774	-334.906	-428.082	209.376
245.2	-0.137855	0.0990024	-0.241634	-160.098	121.294	-300.444	-0.0252701	-0.425051	-0.196449	-29.5528	-498.831	-308.48	-0.29246	-0.698954	0.0565547	-300.059	-878.869	59.4838	-0.235263	-0.280833	-0.181208	-272.278	-319.491	-232.217	-0.317098	-0.368431	0.135707	-330.404	-438.538	164.456
245.1	-0.145368	0.10749	-0.25627	-168.824	131.693	-318.642	-0.0419592	-0.453131	-0.195653	-49.0703	-531.785	-307.23	-0.274525	-0.687448	0.0455118	-281.658	-864.401	47.869	-0.229565	-0.322184	-0.198047	-265.684	-366.534	-253.796	-0.313959	-0.375746	0.0842721	-327.134	-447.245	102.125
245	-0.155765	0.111024	-0.272986	-180.898	136.023	-339.426	-0.0608039	-0.485564	-0.192513	-71.1087	-569.848	-302.3	-0.260417	-0.683767	0.0394075	-267.183	-859.773	41.4485	-0.219693	-0.366217	-0.220441	-254.259	-416.628	-282.494	-0.314065	-0.383034	0.0314964	-327.244	-455.92	38.1688
244.9	-0.167906	0.111632	-0.28648	-194.998	136.768	-356.204	-0.0792794	-0.5142	-0.189873	-92.7153	-603.454	-298.154	-0.242955	-0.668027	0.036912	-249.267	-839.981	38.8238	-0.211273	-0.405588	-0.241488	-244.514	-461.418	-309.465	-0.310689	-0.383329	-0.0278718	-323.726	-456.271	-33.7764
244.8	-0.178593	0.113527	-0.302989	-207.41	139.089	-376.731	-0.0868472	-0.54074	-0.179074	-101.566	-634.601	-281.197	-0.229275	-0.654952	0.0302731	-235.232	-823.541	31.841	-0.20464	-0.44415	-0.259416	-236.837	-505.289	-332.44	-0.307429	-0.377373	-0.0911318	-320.33	-449.181	-110.438
244.7	-0.191161	0.121699	-0.31745	-222.006	149.101	-394.712	-0.0916241	-0.560548	-0.163562	-107.152	-657.847	-256.838	-0.211882	-0.63388	0.0249852	-217.387	-797.045	26.2792	-0.202612	-0.48058	-0.283108	-234.49	-546.733	-362.801	-0.301157	-0.370346	-0.155035	-313.794	-440.817	-187.879
244.6	-0.207003	0.130884	-0.334265	-240.404	160.354	-415.619	-0.0944296	-0.574631	-0.157906	-110.433	-674.375	-247.957	-0.195512	-0.613926	0.0157391	-200.592	-771.954	16.5543	-0.201705	-0.513552	-0.304635	-233.44	-584.244	-390.388	-0.295978	-0.367239	-0.214894	-308.398	-437.119	-260.419
244.5	-0.217566	0.143554	-0.347539	-252.671	175.877	-432.124	-0.101859	-0.595058	-0.149688	-119.122	-698.348	-235.052	-0.192456	-0.594737	-0.00429781	-197.456	-747.826	-4.5204	-0.19152	-0.555137	-0.324538	-221.653	-631.553	-415.894	-0.295751	-0.36195	-0.277284	-308.161	-430.824	-336.026
244.4	-0.227119	0.159527	-0.365068	-263.766	195.447	-453.919	-0.11169	-0.609796	-0.144897	-130.619	-715.644	-227.529	-0.196411	-0.580897	-0.0270825	-201.514	-730.423	-28.4852	-0.179041	-0.586403	-0.340071	-207.211	-667.123	-435.799	-0.302218	-0.356719	-0.33998	-314.9	-424.597	-412.004
244.3	-0.237849	0.17415	-0.381234	-276.227	213.362	-474.02	-0.124594	-0.62133	-0.144248	-145.71	-729.18	-226.51	-0.201375	-0.567404	-0.0474868	-206.607	-713.457	-49.9463	-0.166485	-0.615614	-0.35857	-192.679	-700.355	-459.505	-0.296	-0.348747	-0.399283	-308.421	-415.108	-483.87
244.2	-0.244793	0.187099	-0.396547	-284.291	229.227	-493.06	-0.135208	-0.633016	-0.1496	-158.122	-742.894	-234.914	-0.2092	-0.552789	-0.0703921	-214.635	-695.08	-74.0379	-0.157475	-0.63966	-0.386724	-182.251	-727.711	-495.585	-0.293946	-0.348021	-0.456366	-306.281	-414.244	-553.046
244.1	-0.251179	0.193592	-0.413606	-291.708	237.182	-514.271	-0.152118	-0.638432	-0.158441	-177.898	-749.25	-248.797	-0.225528	-0.526925	-0.088139	-231.388	-662.559	-92.7039	-0.154232	-0.662943	-0.412919	-178.498	-754.199	-529.153	-0.293426	-0.345052	-0.516146	-305.739	-410.71	-625.49
244	-0.264364	0.199457	-0.43179	-307.02	244.368	-536.88	-0.16485	-0.638133	-0.165221	-192.788	-748.899	-259.444	-0.254337	-0.50945	-0.0978154	-260.945	-640.585	-102.881	-0.15616	-0.682756	-0.437952	-180.73	-776.739	-561.233	-0.296596	-0.345386	-0.576483	-309.042	-411.108	-698.61
243.9	-0.276536	0.201798	-0.457898	-321.156	247.236	-569.343	-0.17331	-0.625304	-0.162512	-202.682	-733.844	-255.19	-0.280463	-0.488439	-0.108483	-287.75	-614.166	-114.102	-0.15817	-0.696972	-0.458552	-183.056	-792.912	-587.632	-0.305467	-0.34698	-0.625712	-318.285	-413.005	-758.268
243.8	-0.286619	0.205413	-0.480074	-332.866	251.665	-596.916	-0.181392	-0.61161	-0.167193	-212.134	-717.773	-262.54	-0.306774	-0.471433	-0.124522	-314.744	-592.783	-130.971	-0.154503	-0.71806	-0.472066	-178.812	-816.903	-604.95	-0.315958	-0.349247	-0.673348	-329.216	-415.703	-815.995
243.7	-0.292193	0.2073	-0.504687	-339.34	253.977	-627.519	-0.188808	-0.598625	-0.174646	-220.806	-702.534	-274.243	-0.333541	-0.454388	-0.141449	-342.207	-571.35	-148.775	-0.151716	-0.73483	-0.482883	-175.586	-835.982	-618.812	-0.326844	-0.346831	-0.721765	-340.559	-412.828	-874.669
243.6	-0.294986	0.21245	-0.531506	-342.583	260.286	-660.865	-0.197513	-0.57903	-0.180671	-230.987	-679.537	-283.704	-0.362841	-0.44172	-0.153272	-372.268	-555.421	-161.21	-0.14547	-0.745927	-0.490006	-168.358	-848.606	-627.94	-0.339437	-0.342402	-0.773816	-353.681	-407.556	-937.747
243.5	-0.303133	0.214761	-0.553663	-352.045	263.118	-688.415	-0.205895	-0.557196	-0.195861	-240.789	-653.913	-307.557	-0.40368	-0.432686	-0.164235	-414.168	-544.062	-172.741	-0.140871	-0.745999	-0.505034	-163.035	-848.688	-647.198	-0.352481	-0.345012	-0.816642	-367.272	-410.663	-989.646
243.4	-0.310752	0.212955	-0.574551	-360.893	260.905	-714.387	-0.207779	-0.530946	-0.212085	-242.992	-623.107	-333.033	-0.440199	-0.425596	-0.178439	-451.636	-535.147	-187.681	-0.142671	-0.751034	-0.523395	-165.118	-854.416	-670.728	-0.3732	-0.347727	-0.853035	-388.86	-413.894	-1033.75
243.3	-0.313475	0.212435	-0.591648	-364.055	260.268	-735.645	-0.2132	-0.498916	-0.234095	-249.332	-585.517	-367.595	-0.469884	-0.414429	-0.194521	-482.092	-521.106	-204.596	-0.147269	-0.756477	-0.543222	-170.44	-860.608	-696.136	-0.393689	-0.347425	-0.873909	-410.209	-413.535	-1059.04
243.2	-0.315541	0.20739	-0.613252	-366.455	254.087	-762.507	-0.217744	-0.459752	-0.249634	-254.646	-539.555	-391.996	-0.50961	-0.41051	-0.214437	-522.85	-516.178	-225.543	-0.148823	-0.762962	-0.565085	-172.238	-867.986	-724.153	-0.415762	-0.351159	-0.891876	-433.208	-417.979	-1080.82
243.1	-0.315761	0.190921	-0.631515	-366.71	233.91	-785.215	-0.230147	-0.422983	-0.269457	-269.151	-496.404	-423.123	-0.54568	-0.408379	-0.233791	-559.858	-513.498	-245.9	-0.142266	-0.760932	-0.596258	-164.65	-865.677	-764.101	-0.438946	-0.360653	-0.896243	-457.365	-429.28	-1086.11
243	-0.316567	0.174028	-0.647168	-367.646	213.213	-804.678	-0.242993	-0.394462	-0.299251	-284.174	-462.932	-469.908	-0.585892	-0.408434	-0.249724	-601.114	-513.567	-262.658	-0.139993	-0.763235	-0.623128	-162.019	-868.297	-798.535	-0.466357	-0.369378	-0.901668	-485.927	-439.665	-1092.68
242.9	-0.312843	0.15557	-0.661903	-363.322	190.599	-822.999	-0.24971	-0.365024	-0.318113	-292.03	-428.384	-499.527	-0.629664	-0.407995	-0.259334	-646.024	-513.015	-272.766	-0.143191	-0.758307	-0.644559	-165.72	-862.69	-825.999	-0.50029	-0.377224	-0.899853	-521.283	-449.004	-1090.48
242.8	-0.316241	0.129165	-0.678312	-367.268	158.248	-843.402	-0.251589	-0.332675	-0.33571	-294.227	-390.42	-527.159	-0.667325	-0.400131	-0.262257	-684.663	-503.127	-275.84	-0.145748	-0.741665	-0.66684	-168.679	-843.757	-854.552	-0.533231	-0.384602	-0.89738	-555.607	-457.786	-1087.49
242.7	-0.31826	0.102739	-0.688619	-369.613	125.872	-856.217	-0.253848	-0.302138	-0.360018	-296.869	-354.583	-565.33	-0.701377	-0.396875	-0.268531	-719.6	-499.033	-282.439	-0.150476	-0.727522	-0.695692	-174.151	-827.668	-891.525	-0.571902	-0.398036	-0.89535	-595.901	-473.776	-1085.03
242.6	-0.325078	0.0795124	-0.698418	-377.531	97.4158	-868.401	-0.253223	-0.275653	-0.382893	-296.138	-323.501	-601.25	-0.728703	-0.397198	-0.271449	-747.636	-499.439	-285.508	-0.161314	-0.715654	-0.721838	-186.694	-814.166	-925.031	-0.609003	-0.398755	-0.881938	-634.558	-474.632	-1068.77
242.5	-0.333881	0.0587404	-0.713954	-387.754	71.9667	-887.718	-0.250929	-0.246864	-0.407023	-293.455	-289.714	-639.141	-0.755015	-0.395585	-0.280389	-774.631	-497.411	-294.911	-0.175953	-0.698803	-0.741668	-203.637	-794.995	-950.443	-0.64608	-0.402723	-0.866338	-673.191	-479.355	-1049.87
242.4	-0.341825	0.0335065	-0.733507	-396.98	41.051	-912.03	-0.24166	-0.220541	-0.428943	-282.615	-258.822	-673.561	-0.778616	-0.408976	-0.29853	-798.846	-514.249	-313.992	-0.190936	-0.685651	-0.765965	-220.977	-780.033	-981.58	-0.683265	-0.410313	-0.840936	-711.937	-488.389	-1019.09
242.3	-0.351469	0.0105954	-0.745131	-408.18	12.9811	-926.483	-0.237402	-0.203318	-0.452541	-277.636	-238.61	-710.617	-0.796937	-0.425457	-0.320838	-817.643	-534.972	-337.455	-0.205364	-0.675864	-0.783726	-237.675	-768.899	-1004.34	-0.718876	-0.425251	-0.812751	-749.042	-506.17	-984.931
242.2	-0.361967	-0.0188475	-0.754357	-420.372	-23.0913	-937.955	-0.236912	-0.193111	-0.477901	-277.063	-226.631	-750.439	-0.823379	-0.449642	-0.339099	-844.772	-565.383	-356.662	-0.215797	-0.664326	-0.804109	-249.75	-755.773	-1030.46	-0.751927	-0.441397	-0.778852	-783.48	-525.388	-943.85
242.1	-0.37679	-0.0459227	-0.757672	-437.587	-56.2629	-942.076	-0.240321	-0.184689	-0.499171	-281.05	-216.747	-783.839	-0.849116	-0.472178	-0.357704	-871.177	-593.719	-376.23	-0.227234	-0.655154	-0.832106	-262.986	-745.338	-1066.34	-0.786152	-0.459444	-0.744929	-819.141	-546.869	-902.741
242	-0.386624	-0.0775764	-0.769435	-449.007	-95.0439	-956.702	-0.240657	-0.178215	-0.528653	-281.442	-209.149	-830.134	-0.871604	-0.490961	-0.366563	-894.25	-617.337	-385.548	-0.242486	-0.644581	-0.861601	-280.638	-733.31	-1104.14	-0.823638	-0.471475	-0.711661	-858.2	-561.189	-862.425
241.9	-0.393146	-0.111693	-0.777228	-456.582	-136.842	-966.392	-0.240985	-0.174432	-0.55543	-281.826	-204.71	-872.182	-0.894449	-0.500702	-0.377491	-917.688	-629.586	-397.042	-0.262201	-0.641417	-0.886308	-303.455	-729.71	-1135.8	-0.857427	-0.479981	-0.680594	-893.407	-571.314	-824.776
241.8	-0.394783	-0.144571	-0.79115	-458.483	-177.123	-983.702	-0.245262	-0.174387	-0.583039	-286.828	-204.657	-915.535	-0.918581	-0.511557	-0.394926	-942.447	-643.235	-415.38	-0.281156	-0.629917	-0.911193	-325.392	-716.627	-1167.69	-0.892712	-0.496301	-0.656444	-930.173	-590.739	-795.51
241.7	-0.397267	-0.174979	-0.805701	-461.368	-214.378	-1001.79	-0.247444	-0.176309	-0.604742	-289.38	-206.913	-949.615	-0.943806	-0.533011	-0.409356	-968.328	-670.211	-430.558	-0.302971	-0.622409	-0.930381	-350.639	-708.086	-1192.28	-0.929	-0.511345	-0.637931	-967.983	-608.646	-773.075
241.6	-0.404918	-0.203081	-0.821528	-470.253	-248.808	-1021.47	-0.247402	-0.180726	-0.627354	-289.331	-212.096	-985.122	-0.966659	-0.560212	-0.419126	-991.774	-704.414	-440.834	-0.327804	-0.612961	-0.953037	-379.379	-697.337	-1221.31	-0.96834	-0.524787	-0.626196	-1008.97	-624.646	-758.854
241.5	-0.40818	-0.229859	-0.848238	-474.042	-281.615	-1054.68	-0.247574	-0.189204	-0.64862	-289.532	-222.046	-1018.52	-0.990797	-0.580257	-0.434325	-1016.54	-729.619	-456.82	-0.360362	-0.608354	-0.976151	-417.06	-692.096	-1250.93	-1.00862	-0.534431	-0.610989	-1050.94	-636.125	-740.426
241.4	-0.42341	-0.251088	-0.869119	-491.729	-307.624	-1080.65	-0.251522	-0.197844	-0.672607	-294.149	-232.186	-1056.18	-1.02349	-0.607772	-0.446565	-1050.08	-764.216	-469.694	-0.397981	-0.604081	-0.996077	-460.598	-687.235	-1276.47	-1.04225	-0.541861	-0.595675	-1085.99	-644.969	-721.867
241.3	-0.442437	-0.276708	-0.895407	-513.826	-339.013	-1113.33	-0.256928	-0.205105	-0.696677	-300.471	-240.707	-1093.98	-1.05624	-0.6327	-0.454839	-1083.68	-795.561	-478.396	-0.434456	-0.594863	-1.01426	-502.811	-676.748	-1299.77	-1.07621	-0.555012	-0.579682	-1121.37	-660.622	-702.486
241.2	-0.465297	-0.293544	-0.920806	-540.375	-359.64	-1144.91	-0.268183	-0.218644	-0.724623	-313.633	-256.596	-1137.86	-1.09239	-0.663264	-0.46428	-1120.77	-833.992	-488.326	-0.461189	-0.595229	-1.03849	-533.75	-677.164	-1330.82	-1.10925	-0.581163	-0.569108	-1155.8	-691.749	-689.672
241.1	-0.487444	-0.314677	-0.94383	-566.095	-385.531	-1173.54	-0.282371	-0.239363	-0.753541	-330.226	-280.911	-1183.27	-1.12749	-0.699004	-0.48105	-1156.78	-878.932	-505.965	-0.494193	-0.598509	-1.07159	-571.947	-680.896	-1373.24	-1.13721	-0.604473	-0.560727	-1184.93	-719.495	-679.516
241	-0.505771	-0.335931	-0.967656	-587.379	-411.571	-1203.17	-0.301057	-0.2645	-0.781024	-352.079	-310.412	-1226.43	-1.16158	-0.736956	-0.500507	-1191.76	-926.653	-526.429	-0.526072	-0.603243	-1.10086	-608.842	-686.281	-1410.75	-1.16276	-0.622454	-0.55057	-1211.55	-740.897	-667.207
240.9	-0.517234	-0.359587	-0.991451	-600.692	-440.553	-1232.75	-0.320453	-0.287748	-0.807358	-374.762	-337.695	-1267.78	-1.20332	-0.773405	-0.523758	-1234.58	-972.484	-550.885	-0.554852	-0.611037	-1.12579	-642.15	-695.148	-1442.69	-1.18618	-0.648155	-0.546541	-1235.96	-771.489	-662.325
240.8	-0.525301	-0.38301	-1.01165	-610.061	-469.25	-1257.87	-0.339065	-0.306572	-0.830978	-396.528	-359.786	-1304.87	-1.25716	-0.809345	-0.537089	-1289.82	-1017.68	-564.906	-0.586992	-0.618062	-1.15333	-679.347	-703.14	-1477.99	-1.21621	-0.676114	-0.544691	-1267.25	-804.768	-660.083
240.7	-0.539086	-0.410648	-1.02895	-626.07	-503.111	-1279.38	-0.360482	-0.328598	-0.862001	-421.575	-385.636	-1353.58	-1.304	-0.83874	-0.547301	-1337.88	-1054.64	-575.647	-0.624648	-0.630825	-1.1833	-722.927	-717.66	-1516.39	-1.24352	-0.70273	-0.543788	-1295.7	-836.449	-658.988
240.6	-0.557669	-0.440127	-1.04728	-647.651	-539.228	-1302.17	-0.377115	-0.344227	-0.886195	-441.027	-403.978	-1391.58	-1.34977	-0.864345	-0.557781	-1384.84	-1086.83	-586.67	-0.665214	-0.64502	-1.20189	-769.876	-733.809	-1540.22	-1.26943	-0.729047	-0.55088	-1322.7	-867.773	-667.583
240.5	-0.579384	-0.472263	-1.0695	-672.87	-578.6	-1329.8	-0.39698	-0.355693	-0.903731	-464.258	-417.434	-1419.11	-1.39769	-0.891255	-0.570571	-1434	-1120.67	-600.122	-0.697327	-0.655112	-1.2255	-807.041	-745.29	-1570.47	-1.29268	-0.763264	-0.558942	-1346.92	-908.501	-677.353
240.4	-0.604413	-0.507898	-1.09392	-701.938	-622.259	-1360.16	-0.407402	-0.367996	-0.931646	-476.447	-431.872	-1462.95	-1.44639	-0.916866	-0.58482	-1483.97	-1152.87	-615.109	-0.730793	-0.67457	-1.24116	-845.773	-767.427	-1590.54	-1.31755	-0.800402	-0.572117	-1372.84	-952.706	-693.319
240.3	-0.63226	-0.545093	-1.11971	-734.278	-667.829	-1392.23	-0.421548	-0.380684	-0.950687	-492.99	-446.763	-1492.85	-1.4949	-0.955087	-0.605848	-1533.74	-1200.93	-637.226	-0.761818	-0.695039	-1.25779	-881.679	-790.713	-1611.85	-1.34073	-0.837909	-0.580671	-1396.99	-997.35	-703.685
240.2	-0.660847	-0.587311	-1.14264	-767.477	-719.553	-1420.74	-0.435878	-0.397881	-0.971293	-509.749	-466.945	-1525.2	-1.54761	-1.00282	-0.623727	-1587.82	-1260.95	-656.031	-0.800876	-0.716644	-1.27505	-926.882	-815.292	-1633.97	-1.3551	-0.869133	-0.587746	-1411.96	-1034.52	-712.259
240.1	-0.696782	-0.638254	-1.15947	-809.211	-781.966	-1441.67	-0.453328	-0.410726	-0.994786	-530.156	-482.019	-1562.09	-1.60281	-1.03715	-0.645875	-1644.45	-1304.12	-679.326	-0.842413	-0.746411	-1.29329	-974.955	-849.157	-1657.34	-1.36979	-0.911424	-0.604215	-1427.27	-1084.85	-732.217
240	-0.734546	-0.695714	-1.16821	-853.068	-852.364	-1452.53	-0.47348	-0.427105	-1.01881	-553.723	-501.241	-1599.82	-1.65067	-1.06979	-0.66956	-1693.56	-1345.16	-704.238	-0.875397	-0.779338	-1.31186	-1013.13	-886.616	-1681.14	-1.37284	-0.953643	-0.622026	-1430.45	-1135.11	-753.801
239.9	-0.779564	-0.746425	-1.17287	-905.35	-914.494	-1458.33	-0.4962	-0.443736	-1.04696	-580.294	-520.759	-1644.02	-1.68851	-1.09836	-0.682042	-1732.38	-1381.08	-717.367	-0.905209	-0.815485	-1.33083	-1047.63	-927.739	-1705.45	-1.37832	-0.992769	-0.642011	-1436.16	-1181.68	-778.02
239.8	-0.815413	-0.801149	-1.18238	-946.983	-981.54	-1470.15	-0.519083	-0.458057	-1.06908	-607.055	-537.566	-1678.76	-1.7239	-1.121	-0.690458	-1768.69	-1409.55	-726.219	-0.933049	-0.849718	-1.35062	-1079.85	-966.684	-1730.81	-1.38612	-1.0334	-0.670572	-1444.29	-1230.04	-812.631
239.7	-0.847005	-0.851499	-1.18979	-983.673	-1043.23	-1479.36	-0.544667	-0.475845	-1.08452	-636.975	-558.442	-1703	-1.75046	-1.14985	-0.705373	-1795.94	-1445.83	-741.906	-0.958653	-0.888954	-1.36689	-1109.48	-1011.32	-1751.66	-1.3984	-1.06977	-0.704992	-1457.08	-1273.33	-854.343
239.6	-0.868018	-0.90253	-1.20233	-1008.08	-1105.75	-1494.96	-0.561253	-0.495901	-1.10009	-656.372	-581.979	-1727.45	-1.77244	-1.17805	-0.720162	-1818.49	-1481.29	-757.461	-0.988672	-0.926335	-1.38037	-1144.23	-1053.85	-1768.94	-1.41193	-1.10201	-0.744809	-1471.18	-1311.71	-902.595
239.5	-0.893945	-0.951985	-1.21585	-1038.19	-1166.34	-1511.77	-0.578506	-0.519278	-1.1111	-676.549	-609.414	-1744.74	-1.7935	-1.20545	-0.736558	-1840.1	-1515.74	-774.706	-1.01713	-0.960277	-1.38624	-1177.16	-1092.46	-1776.46	-1.42184	-1.14017	-0.785594	-1481.5	-1357.13	-952.02
239.4	-0.92765	-0.997963	-1.23063	-1077.33	-1222.67	-1530.14	-0.597331	-0.536804	-1.11896	-698.564	-629.982	-1757.08	-1.82143	-1.23073	-0.757932	-1868.75	-1547.53	-797.187	-1.03932	-0.99083	-1.39735	-1202.84	-1127.22	-1790.7	-1.43155	-1.19028	-0.827587	-1491.62	-1416.77	-1002.91
239.3	-0.972347	-1.04453	-1.24119	-1129.24	-1279.72	-1543.27	-0.61456	-0.550582	-1.12889	-718.713	-646.151	-1772.68	-1.84205	-1.25331	-0.775007	-1889.91	-1575.92	-815.147	-1.06413	-1.0309	-1.40898	-1231.56	-1172.81	-1805.6	-1.44221	-1.23355	-0.867918	-1502.73	-1468.28	-1051.78
239.2	-1.01834	-1.08504	-1.24916	-1182.65	-1329.35	-1553.18	-0.640801	-0.565497	-1.14667	-749.401	-663.655	-1800.59	-1.85488	-1.27501	-0.792677	-1903.07	-1603.21	-833.732	-1.0898	-1.06744	-1.4257	-1261.26	-1214.38	-1827.03	-1.4566	-1.27861	-0.910468	-1517.72	-1521.91	-1103.35
239.1	-1.06522	-1.13005	-1.25566	-1237.1	-1384.5	-1561.27	-0.670279	-0.584179	-1.16036	-783.875	-685.58	-1822.09	-1.86959	-1.29481	-0.816278	-1918.16	-1628.1	-858.555	-1.1089	-1.10671	-1.43769	-1283.37	-1259.05	-1842.39	-1.46696	-1.3236	-0.950631	-1528.52	-1575.46	-1152.02
239	-1.11135	-1.16844	-1.25331	-1290.67	-1431.53	-1558.34	-0.70453	-0.60228	-1.18193	-823.931	-706.823	-1855.96	-1.87971	-1.32104	-0.841372	-1928.55	-1661.08	-884.949	-1.12076	-1.14564	-1.45905	-1297.1	-1303.34	-1869.76	-1.47908	-1.36436	-0.990912	-1541.15	-1623.98	-1200.83
238.9	-1.14325	-1.2018	-1.25247	-1327.72	-1472.4	-1557.3	-0.739195	-0.630524	-1.21264	-864.47	-739.97	-1904.19	-1.8857	-1.33833	-0.866048	-1934.69	-1682.82	-910.903	-1.12901	-1.19446	-1.48649	-1306.64	-1358.88	-1904.93	-1.49219	-1.40397	-1.03502	-1554.81	-1671.12	-1254.29
238.8	-1.17705	-1.22514	-1.2494	-1366.97	-1501	-1553.48	-0.774831	-0.6622	-1.24363	-906.146	-777.144	-1952.85	-1.8936	-1.35312	-0.902855	-1942.8	-1701.42	-949.616	-1.1327	-1.24493	-1.51916	-1310.91	-1416.3	-1946.79	-1.50292	-1.44421	-1.07817	-1565.99	-1719.02	-1306.58
238.7	-1.20908	-1.25016	-1.24914	-1404.17	-1531.65	-1553.16	-0.803953	-0.691083	-1.27377	-940.203	-811.04	-2000.18	-1.89088	-1.37579	-0.945203	-1940.01	-1729.93	-994.157	-1.151	-1.28562	-1.55371	-1332.09	-1462.59	-1991.07	-1.51962	-1.48174	-1.11726	-1583.39	-1763.69	-1353.95
238.6	-1.25089	-1.27511	-1.24904	-1452.73	-1562.22	-1553.03	-0.832402	-0.719777	-1.3015	-973.474	-844.715	-2043.72	-1.88875	-1.38713	-0.983253	-1937.82	-1744.19	-1034.18	-1.16422	-1.32631	-1.58857	-1347.39	-1508.88	-2035.74	-1.53808	-1.52706	-1.15498	-1602.62	-1817.64	-1399.66
238.5	-1.28776	-1.29297	-1.25057	-1495.55	-1584.1	-1554.94	-0.858358	-0.750475	-1.32637	-1003.83	-880.742	-2082.77	-1.88499	-1.39395	-1.01756	-1933.97	-1752.76	-1070.26	-1.17922	-1.36902	-1.62086	-1364.75	-1557.47	-2077.12	-1.56105	-1.57504	-1.19708	-1626.56	-1874.75	-1450.68
238.4	-1.33087	-1.30813	-1.25461	-1545.61	-1602.67	-1559.96	-0.881539	-0.782337	-1.3548	-1030.94	-918.134	-2127.42	-1.8846	-1.40932	-1.04897	-1933.56	-1772.09	-1103.3	-1.20321	-1.40489	-1.65648	-1392.52	-1598.28	-2122.77	-1.58331	-1.61921	-1.23461	-1649.75	-1927.32	-1496.16
238.3	-1.37521	-1.32061	-1.26376	-1597.11	-1617.96	-1571.34	-0.90289	-0.818425	-1.38552	-1055.91	-960.486	-2175.66	-1.8824	-1.42574	-1.08978	-1931.31	-1792.73	-1146.22	-1.23443	-1.4376	-1.68827	-1428.65	-1635.49	-2163.51	-1.60426	-1.65974	-1.28151	-1671.58	-1975.56	-1553
238.2	-1.4146	-1.32647	-1.27324	-1642.85	-1625.14	-1583.12	-0.925677	-0.859429	-1.41121	-1082.56	-1008.61	-2216	-1.89385	-1.44445	-1.13059	-1943.06	-1816.26	-1189.15	-1.26659	-1.45921	-1.71876	-1465.87	-1660.07	-2202.58	-1.631	-1.70928	-1.33334	-1699.44	-2034.53	-1615.81
238.1	-1.44938	-1.32787	-1.28776	-1683.24	-1626.86	-1601.18	-0.945987	-0.897272	-1.44062	-1106.31	-1053.02	-2262.18	-1.91174	-1.46914	-1.17793	-1961.41	-1847.31	-1238.94	-1.29964	-1.49178	-1.75319	-1504.12	-1697.13	-2246.7	-1.65852	-1.75424	-1.3807	-1728.12	-2088.05	-1673.2
238	-1.48701	-1.3297	-1.30435	-1726.95	-1629.1	-1621.81	-0.969296	-0.933989	-1.47721	-1133.57	-1096.11	-2319.64	-1.92725	-1.48683	-1.2287	-1977.32	-1869.55	-1292.34	-1.33256	-1.52647	-1.78571	-1542.22	-1736.59	-2288.38	-1.68597	-1.79886	-1.42717	-1756.72	-2141.16	-1729.51
237.9	-1.53075	-1.33383	-1.32424	-1777.74	-1634.16	-1646.54	-0.999463	-0.976262	-1.51123	-1168.85	-1145.72	-2373.06	-1.9431	-1.5069	-1.27806	-1993.58	-1894.79	-1344.25	-1.372	-1.55802	-1.82316	-1587.86	-1772.49	-2336.37	-1.70684	-1.84456	-1.47425	-1778.46	-2195.55	-1786.57
237.8	-1.57495	-1.33366	-1.3361	-1829.07	-1633.95	-1661.28	-1.03106	-1.0165	-1.56068	-1205.8	-1192.94	-2450.71	-1.96453	-1.52774	-1.32969	-2015.57	-1920.99	-1398.56	-1.41635	-1.59835	-1.85933	-1639.19	-1818.37	-2382.72	-1.73215	-1.88519	-1.52114	-1804.84	-2243.91	-1843.39
237.7	-1.62588	-1.33508	-1.3606	-1888.22	-1635.69	-1691.75	-1.063	-1.05784	-1.61433	-1243.15	-1241.46	-2534.95	-1.98289	-1.54425	-1.37498	-2034.41	-1941.75	-1446.19	-1.45253	-1.64122	-1.89341	-1681.06	-1867.14	-2426.39	-1.76184	-1.92422	-1.57303	-1835.77	-2290.37	-1906.27
237.6	-1.6619	-1.33466	-1.39049	-1930.05	-1635.18	-1728.91	-1.09371	-1.10645	-1.66906	-1279.07	-1298.51	-2620.89	-2.0039	-1.57563	-1.42197	-2055.96	-1981.21	-1495.62	-1.48935	-1.6748	-1.92559	-1723.68	-1905.34	-2467.63	-1.79193	-1.96593	-1.62582	-1867.12	-2340.02	-1970.25
237.5	-1.70082	-1.3363	-1.42812	-1975.25	-1637.19	-1775.7	-1.11778	-1.16175	-1.72619	-1307.22	-1363.41	-2710.6	-2.03216	-1.60922	-1.47267	-2084.96	-2023.44	-1548.94	-1.53646	-1.70814	-1.95719	-1778.2	-1943.27	-2508.13	-1.82709	-1.99773	-1.68169	-1903.76	-2377.87	-2037.95
237.4	-1.73185	-1.33743	-1.47046	-2011.29	-1638.57	-1828.34	-1.14378	-1.22313	-1.77862	-1337.62	-1435.44	-2792.93	-2.06641	-1.64399	-1.5277	-2120.1	-2067.16	-1606.82	-1.59034	-1.7398	-1.99354	-1840.56	-1979.29	-2554.71	-1.86551	-2.03244	-1.73698	-1943.79	-2419.18	-2104.96
237.3	-1.76963	-1.33903	-1.51556	-2055.17	-1640.53	-1884.42	-1.17297	-1.28347	-1.8315	-1371.76	-1506.25	-2875.97	-2.10768	-1.67933	-1.58832	-2162.44	-2111.6	-1670.58	-1.64887	-1.77251	-2.03129	-1908.3	-2016.5	-2603.09	-1.90313	-2.0631	-1.79156	-1982.99	-2455.68	-2171.1
237.2	-1.80818	-1.35344	-1.56551	-2099.94	-1658.19	-1946.53	-1.20261	-1.35318	-1.88258	-1406.42	-1588.06	-2956.18	-2.14934	-1.7131	-1.64616	-2205.18	-2154.06	-1731.42	-1.71169	-1.80337	-2.06089	-1981	-2051.61	-2641.02	-1.94562	-2.10345	-1.84812	-2027.26	-2503.7	-2239.64
237.1	-1.85183	-1.36839	-1.60997	-2150.63	-1676.5	-2001.81	-1.24063	-1.4294	-1.93586	-1450.89	-1677.51	-3039.85	-2.19537	-1.74767	-1.70476	-2252.41	-2197.53	-1793.05	-1.77354	-1.83869	-2.0888	-2052.58	-2091.79	-2676.79	-1.98678	-2.14415	-1.90474	-2070.15	-2552.15	-2308.26
237	-1.89188	-1.38771	-1.65233	-2197.14	-1700.17	-2054.48	-1.28608	-1.50192	-1.99054	-1504.04	-1762.62	-3125.71	-2.24075	-1.77898	-1.76057	-2298.97	-2236.9	-1851.75	-1.8343	-1.8741	-2.12462	-2122.9	-2132.08	-2722.69	-2.02478	-2.17939	-1.96053	-2109.75	-2594.09	-2375.86
236.9	-1.93006	-1.40719	-1.69429	-2241.48	-1724.04	-2106.65	-1.33779	-1.57368	-2.0482	-1564.51	-1846.84	-3216.25	-2.27872	-1.81182	-1.80901	-2337.92	-2278.19	-1902.7	-1.89474	-1.90676	-2.16016	-2192.85	-2169.23	-2768.23	-2.06553	-2.21189	-2.00985	-2152.21	-2632.78	-2435.63
236.8	-1.96131	-1.42921	-1.72726	-2277.78	-1751.02	-2147.65	-1.38713	-1.64974	-2.10285	-1622.21	-1936.1	-3302.07	-2.32937	-1.84951	-1.86924	-2389.89	-2325.58	-1966.05	-1.95357	-1.94489	-2.19437	-2260.94	-2212.61	-2812.07	-2.10797	-2.25026	-2.05887	-2196.43	-2678.45	-2495.04
236.7	-1.99669	-1.46138	-1.77092	-2318.86	-1790.43	-2201.93	-1.4349	-1.7314	-2.15412	-1678.08	-2031.93	-3382.58	-2.38249	-1.88069	-1.93214	-2444.39	-2364.79	-2032.21	-2.00113	-1.9878	-2.22504	-2315.98	-2261.43	-2851.38	-2.14511	-2.28565	-2.10272	-2235.12	-2720.57	-2548.18
236.6	-2.03132	-1.48854	-1.81054	-2359.08	-1823.71	-2251.19	-1.48122	-1.81299	-2.20717	-1732.25	-2127.69	-3465.88	-2.43487	-1.91614	-1.99643	-2498.13	-2409.37	-2099.83	-2.05258	-2.02702	-2.25683	-2375.52	-2306.05	-2892.11	-2.18001	-2.32014	-2.14878	-2271.49	-2761.63	-2603.99
236.5	-2.07382	-1.52925	-1.85309	-2408.44	-1873.58	-2304.1	-1.52357	-1.88979	-2.2667	-1781.78	-2217.82	-3559.36	-2.48694	-1.94992	-2.05947	-2551.55	-2451.84	-2166.14	-2.10192	-2.0706	-2.2883	-2432.63	-2355.62	-2932.44	-2.22063	-2.35578	-2.19713	-2313.81	-2804.05	-2662.59
236.4	-2.12826	-1.57754	-1.89549	-2471.66	-1932.75	-2356.82	-1.57184	-1.96788	-2.32014	-1838.23	-2309.46	-3643.27	-2.53876	-1.98959	-2.12508	-2604.72	-2501.72	-2235.14	-2.15978	-2.10411	-2.31808	-2499.59	-2393.75	-2970.61	-2.26795	-2.40064	-2.24367	-2363.12	-2857.45	-2718.99
236.3	-2.18085	-1.63095	-1.93649	-2532.74	-1998.18	-2407.8	-1.6238	-2.03933	-2.37061	-1898.99	-2393.31	-3722.53	-2.58706	-2.03406	-2.18313	-2654.28	-2557.64	-2296.2	-2.22298	-2.13709	-2.34144	-2572.73	-2431.27	-3000.54	-2.32208	-2.43798	-2.28711	-2419.52	-2901.89	-2771.63
236.2	-2.23247	-1.68527	-1.9758	-2592.69	-2064.73	-2456.68	-1.68196	-2.10614	-2.42054	-1967.01	-2471.72	-3800.93	-2.6424	-2.07143	-2.23202	-2711.05	-2604.63	-2347.62	-2.27359	-2.18015	-2.36534	-2631.31	-2480.25	-3031.17	-2.36823	-2.46847	-2.33108	-2467.61	-2938.18	-2824.91
236.1	-2.27553	-1.74135	-2.01075	-2642.7	-2133.44	-2500.13	-1.72796	-2.1724	-2.46705	-2020.81	-2549.48	-3873.96	-2.69293	-2.11772	-2.285	-2762.9	-2662.83	-2403.35	-2.32853	-2.22263	-2.38728	-2694.89	-2528.58	-3059.29	-2.41637	-2.50406	-2.37607	-2517.77	-2980.54	-2879.44
236	-2.32581	-1.79706	-2.03866	-2701.09	-2201.69	-2534.83	-1.77571	-2.23492	-2.51324	-2076.65	-2622.86	-3946.49	-2.74217	-2.16479	-2.34122	-2813.42	-2722.02	-2462.48	-2.38085	-2.26119	-2.41196	-2755.44	-2572.45	-3090.91	-2.46384	-2.53928	-2.42042	-2567.23	-3022.47	-2933.18
235.9	-2.37937	-1.85574	-2.06803	-2763.29	-2273.59	-2571.35	-1.82867	-2.2998	-2.55341	-2138.58	-2699	-4009.57	-2.78199	-2.20892	-2.39885	-2854.27	-2777.51	-2523.09	-2.42249	-2.30664	-2.44146	-2803.63	-2624.16	-3128.72	-2.51164	-2.57135	-2.46258	-2617.03	-3060.64	-2984.27
235.8	-2.43386	-1.90898	-2.0996	-2826.57	-2338.82	-2610.61	-1.88206	-2.36796	-2.5836	-2201.02	-2778.99	-4056.98	-2.82731	-2.24984	-2.45174	-2900.77	-2828.96	-2578.72	-2.45862	-2.36502	-2.4764	-2845.45	-2690.57	-3173.49	-2.56358	-2.61289	-2.50143	-2671.15	-3110.08	-3031.35
235.7	-2.49091	-1.96787	-2.12685	-2892.83	-2410.97	-2644.49	-1.92635	-2.42839	-2.61798	-2252.82	-2849.91	-4110.97	-2.86141	-2.28944	-2.50592	-2935.75	-2878.76	-2635.71	-2.49188	-2.43277	-2.50484	-2883.94	-2767.65	-3209.94	-2.61448	-2.65399	-2.53865	-2724.19	-3159	-3076.46
235.6	-2.55306	-2.02977	-2.15531	-2965.01	-2486.8	-2679.88	-1.97665	-2.4858	-2.6561	-2311.64	-2917.28	-4170.83	-2.89729	-2.32857	-2.55297	-2972.57	-2927.96	-2685.19	-2.52793	-2.49281	-2.53218	-2925.66	-2835.95	-3244.97	-2.66899	-2.70349	-2.57404	-2780.99	-3217.92	-3119.34
235.5	-2.60959	-2.08789	-2.18435	-3030.66	-2558.01	-2715.98	-2.02012	-2.54031	-2.69547	-2362.48	-2981.25	-4232.65	-2.93496	-2.37695	-2.602	-3011.21	-2988.79	-2736.76	-2.57169	-2.56176	-2.56105	-2976.31	-2914.39	-3281.97	-2.72069	-2.74062	-2.60872	-2834.86	-3262.12	-3161.37
235.4	-2.66764	-2.14803	-2.21459	-3098.07	-2631.69	-2753.58	-2.06517	-2.59298	-2.73221	-2415.17	-3043.07	-4290.34	-2.97177	-2.43286	-2.65574	-3048.98	-3059.09	-2793.29	-2.60792	-2.63373	-2.59054	-3018.24	-2996.27	-3319.76	-2.77311	-2.77517	-2.64443	-2889.48	-3303.24	-3204.65
235.3	-2.73075	-2.2164	-2.24719	-3171.37	-2715.46	-2794.12	-2.10904	-2.64332	-2.76236	-2466.47	-3102.14	-4337.68	-3.01803	-2.48949	-2.71335	-3096.44	-3130.3	-2853.88	-2.64385	-2.70339	-2.61452	-3059.82	-3075.52	-3350.49	-2.83118	-2.81272	-2.69159	-2949.98	-3347.94	-3261.8
235.2	-2.79411	-2.28583	-2.27322	-3244.95	-2800.52	-2826.48	-2.14837	-2.69549	-2.78765	-2512.47	-3163.37	-4377.4	-3.06793	-2.5514	-2.77641	-3147.64	-3208.15	-2920.21	-2.68951	-2.77627	-2.64109	-3112.67	-3158.43	-3384.54	-2.89491	-2.85309	-2.74043	-3016.39	-3395.99	-3320.98
235.1	-2.86925	-2.35301	-2.30135	-3332.22	-2882.83	-2861.46	-2.19043	-2.7474	-2.81082	-2561.65	-3224.29	-4413.78	-3.11903	-2.61075	-2.83795	-3200.07	-3282.77	-2984.93	-2.73856	-2.85146	-2.66944	-3169.43	-3243.97	-3420.87	-2.95753	-2.89336	-2.78479	-3081.64	-3443.92	-3374.74
235	-2.93873	-2.41221	-2.33305	-3412.91	-2955.35	-2900.87	-2.24059	-2.78827	-2.83271	-2620.32	-3272.25	-4448.15	-3.1657	-2.66812	-2.89075	-3247.95	-3354.91	-3040.47	-2.78833	-2.9332	-2.70253	-3227.03	-3336.96	-3463.28	-3.03211	-2.94108	-2.83057	-3159.35	-3500.72	-3430.22
234.9	-3.01445	-2.47717	-2.36812	-3500.84	-3034.94	-2944.48	-2.28605	-2.82069	-2.8497	-2673.48	-3310.3	-4474.83	-3.21086	-2.71741	-2.9452	-3294.28	-3416.89	-3097.74	-2.83771	-3.02211	-2.73103	-3284.18	-3438.11	-3499.8	-3.10303	-2.98424	-2.87677	-3233.24	-3552.1	-3486.21
234.8	-3.09241	-2.54076	-2.39949	-3591.38	-3112.85	-2983.48	-2.33623	-2.85602	-2.8678	-2732.16	-3351.76	-4503.25	-3.25581	-2.7689	-2.99786	-3340.4	-3481.63	-3153.13	-2.88623	-3.11524	-2.75555	-3340.34	-3544.06	-3531.22	-3.17461	-3.02574	-2.91368	-3307.82	-3601.49	-3530.94
234.7	-3.17069	-2.59104	-2.43151	-3682.29	-3174.45	-3023.3	-2.38031	-2.88875	-2.89482	-2783.71	-3390.18	-4545.68	-3.30751	-2.81632	-3.0545	-3393.44	-3541.26	-3212.7	-2.93762	-3.21483	-2.78715	-3399.81	-3657.36	-3571.72	-3.23818	-3.05923	-2.95437	-3374.06	-3641.35	-3580.25
234.6	-3.24896	-2.64894	-2.47123	-3773.19	-3245.39	-3072.69	-2.42762	-2.91971	-2.92477	-2839.04	-3426.51	-4592.71	-3.37096	-2.86177	-3.11273	-3458.54	-3598.41	-3273.95	-2.99112	-3.30905	-2.81823	-3461.73	-3764.55	-3611.55	-3.30415	-3.0941	-2.99347	-3442.8	-3682.86	-3627.63
234.5	-3.33672	-2.71024	-2.51215	-3875.11	-3320.49	-3123.56	-2.46331	-2.95596	-2.95322	-2880.78	-3469.05	-4637.39	-3.43578	-2.91461	-3.17878	-3525.05	-3664.85	-3343.42	-3.05358	-3.40303	-2.85106	-3534.02	-3871.47	-3653.62	-3.38166	-3.13933	-3.03169	-3523.56	-3736.7	-3673.95
234.4	-3.42792	-2.76922	-2.56371	-3981.03	-3392.75	-3187.67	-2.49975	-2.9989	-2.98361	-2923.4	-3519.45	-4685.11	-3.50382	-2.97027	-3.24725	-3594.85	-3734.84	-3415.43	-3.12981	-3.50259	-2.89008	-3622.24	-3984.73	-3703.62	-3.46064	-3.1916	-3.07107	-3605.86	-3798.91	-3721.67
234.3	-3.51997	-2.83778	-2.62836	-4087.93	-3476.75	-3268.06	-2.54323	-3.0351	-3.01747	-2974.25	-3561.93	-4738.28	-3.57421	-3.02612	-3.30581	-3667.07	-3805.06	-3477.03	-3.2175	-3.60436	-2.92613	-3723.73	-4100.51	-3749.82	-3.53942	-3.24366	-3.11589	-3687.94	-3860.88	-3775.98
234.2	-3.6111	-2.913	-2.68899	-4193.77	-3568.91	-3343.44	-2.59448	-3.072	-3.05502	-3034.18	-3605.23	-4797.24	-3.65099	-3.09363	-3.37015	-3745.85	-3889.95	-3544.7	-3.31925	-3.70298	-2.9565	-3841.49	-4212.71	-3788.74	-3.61865	-3.29977	-3.16132	-3770.5	-3927.67	-3831.04
234.1	-3.70768	-2.991	-2.75965	-4305.93	-3664.47	-3431.3	-2.65251	-3.10591	-3.08844	-3102.05	-3645.03	-4849.72	-3.72993	-3.15804	-3.43256	-3826.84	-3970.94	-3610.34	-3.42095	-3.80261	-2.99829	-3959.19	-4326.05	-3842.29	-3.70083	-3.36062	-3.20477	-3856.13	-4000.09	-3883.69
234	-3.80076	-3.0669	-2.83576	-4414.03	-3757.46	-3525.94	-2.71834	-3.14359	-3.11056	-3179.03	-3689.25	-4884.46	-3.81712	-3.22543	-3.49945	-3916.29	-4055.68	-3680.7	-3.52716	-3.89466	-3.03823	-4082.11	-4430.77	-3893.47	-3.77924	-3.418	-3.25442	-3937.83	-4068.39	-3943.86
233.9	-3.89218	-3.1413	-2.91251	-4520.2	-3848.61	-3621.37	-2.78058	-3.17801	-3.1348	-3251.82	-3729.65	-4922.52	-3.91084	-3.28901	-3.56245	-4012.45	-4135.62	-3746.96	-3.62783	-3.99196	-3.09085	-4198.62	-4541.47	-3960.91	-3.85818	-3.48165	-3.30192	-4020.08	-4144.15	-4001.42
233.8	-3.98375	-3.20957	-2.98708	-4626.54	-3932.25	-3714.08	-2.84484	-3.21478	-3.16249	-3326.97	-3772.8	-4966	-4.00545	-3.34811	-3.62024	-4109.52	-4209.93	-3807.74	-3.7336	-4.08969	-3.14894	-4321.03	-4652.65	-4035.35	-3.94275	-3.54766	-3.34641	-4108.2	-4222.73	-4055.34
233.7	-4.07948	-3.27355	-3.07425	-4737.72	-4010.64	-3822.47	-2.90725	-3.25895	-3.19499	-3399.96	-3824.64	-5017.03	-4.10219	-3.40607	-3.68047	-4208.77	-4282.81	-3871.09	-3.85337	-4.17792	-3.21041	-4459.64	-4753.02	-4114.12	-4.02883	-3.61782	-3.38795	-4197.89	-4306.24	-4105.68
233.6	-4.17601	-3.34266	-3.17148	-4849.83	-4095.31	-3943.36	-2.97452	-3.30707	-3.23406	-3478.63	-3881.11	-5078.39	-4.21192	-3.46256	-3.74463	-4321.35	-4353.84	-3938.57	-3.97255	-4.27629	-3.27166	-4597.57	-4864.93	-4192.61	-4.12602	-3.67739	-3.42247	-4299.16	-4377.14	-4147.51
233.5	-4.26932	-3.41811	-3.27049	-4958.19	-4187.75	-4066.47	-3.0407	-3.35682	-3.27683	-3556.02	-3939.49	-5145.55	-4.32809	-3.5175	-3.81311	-4440.54	-4422.93	-4010.6	-4.09069	-4.36969	-3.33442	-4734.3	-4971.19	-4273.04	-4.21695	-3.74099	-3.45593	-4393.9	-4452.84	-4188.06
233.4	-4.36198	-3.49032	-3.3727	-5065.8	-4276.22	-4193.56	-3.10775	-3.41002	-3.33088	-3634.44	-4001.93	-5230.42	-4.44872	-3.57171	-3.88787	-4564.3	-4491.09	-4089.23	-4.21192	-4.46017	-3.39211	-4874.61	-5074.13	-4346.97	-4.30968	-3.79989	-3.49362	-4490.53	-4522.95	-4233.74
233.3	-4.45161	-3.57336	-3.47061	-5169.9	-4377.96	-4315.3	-3.18062	-3.46197	-3.39387	-3719.66	-4062.9	-5329.33	-4.56089	-3.63368	-3.96623	-4679.39	-4569.01	-4171.65	-4.3299	-4.53761	-3.44506	-5011.15	-5162.23	-4414.82	-4.39841	-3.85865	-3.52907	-4582.98	-4592.89	-4276.7
233.2	-4.54136	-3.65568	-3.57974	-5274.13	-4478.81	-4450.99	-3.26016	-3.51764	-3.45385	-3812.68	-4128.23	-5423.52	-4.68435	-3.70329	-4.03673	-4806.06	-4656.54	-4245.8	-4.4525	-4.61095	-3.51006	-5153.04	-5245.66	-4498.12	-4.48583	-3.92409	-3.56648	-4674.07	-4670.78	-4322.03
233.1	-4.63146	-3.7366	-3.68628	-5378.77	-4577.95	-4583.46	-3.34202	-3.56915	-3.51112	-3908.41	-4188.68	-5513.45	-4.80609	-3.77112	-4.11029	-4930.96	-4741.83	-4323.17	-4.57641	-4.68315	-3.5791	-5296.44	-5327.8	-4586.6	-4.56754	-3.98541	-3.60422	-4759.21	-4743.77	-4367.77
233	-4.72071	-3.82037	-3.79197	-5482.42	-4680.58	-4714.87	-3.42286	-3.61977	-3.57053	-4002.95	-4248.09	-5606.74	-4.92741	-3.83813	-4.17868	-5055.43	-4826.09	-4395.1	-4.69123	-4.74862	-3.65263	-5429.33	-5402.28	-4680.82	-4.6506	-4.05652	-3.64354	-4845.75	-4828.41	-4415.42
232.9	-4.79976	-3.89434	-3.89861	-5574.22	-4771.21	-4847.47	-3.51137	-3.67124	-3.63174	-4106.46	-4308.49	-5702.85	-5.04975	-3.8915	-4.24253	-5180.95	-4893.2	-4462.26	-4.80421	-4.81034	-3.72703	-5560.08	-5472.5	-4776.17	-4.74122	-4.12538	-3.68252	-4940.17	-4910.38	-4462.65
232.8	-4.8753	-3.97155	-4.01458	-5661.95	-4865.8	-4991.66	-3.60829	-3.72304	-3.69055	-4219.81	-4369.28	-5795.2	-5.16755	-3.94015	-4.30474	-5301.81	-4954.37	-4527.69	-4.91455	-4.86728	-3.80912	-5687.78	-5537.28	-4881.37	-4.82757	-4.19534	-3.71778	-5030.15	-4993.65	-4505.38
232.7	-4.94897	-4.04924	-4.12988	-5747.51	-4960.99	-5135.02	-3.71273	-3.77492	-3.74993	-4341.95	-4430.17	-5888.45	-5.28537	-3.98122	-4.36899	-5422.69	-5006.01	-4595.27	-5.01296	-4.91885	-3.89278	-5801.68	-5595.94	-4988.58	-4.90496	-4.26168	-3.74693	-5110.78	-5072.61	-4540.71
232.6	-5.02159	-4.12491	-4.24799	-5831.84	-5053.69	-5281.88	-3.81463	-3.82392	-3.80726	-4461.12	-4487.67	-5978.47	-5.39738	-4.01303	-4.43296	-5537.61	-5046.01	-4662.55	-5.10546	-4.97151	-3.98513	-5908.73	-5655.85	-5106.92	-4.98673	-4.32706	-3.77668	-5195.99	-5150.43	-4576.76
232.5	-5.09625	-4.19903	-4.36286	-5918.55	-5144.5	-5424.71	-3.91406	-3.87205	-3.8702	-4577.4	-4544.16	-6077.3	-5.50703	-4.05232	-4.50464	-5650.11	-5095.41	-4737.95	-5.19424	-5.02084	-4.07983	-6011.48	-5711.97	-5228.28	-5.06613	-4.38911	-3.80448	-5278.72	-5224.29	-4610.45
232.4	-5.16941	-4.27018	-4.47719	-6003.52	-5231.67	-5566.86	-4.0209	-3.93296	-3.94623	-4702.34	-4615.64	-6196.69	-5.62514	-4.09712	-4.5736	-5771.29	-5151.74	-4810.48	-5.2678	-5.05543	-4.17643	-6096.61	-5751.33	-5352.07	-5.15038	-4.46198	-3.84103	-5366.5	-5311.03	-4654.74
232.3	-5.24191	-4.34671	-4.5961	-6087.71	-5325.44	-5714.71	-4.12076	-3.99641	-4.02573	-4819.13	-4690.1	-6321.53	-5.73844	-4.14653	-4.64248	-5887.53	-5213.87	-4882.93	-5.34061	-5.08973	-4.27868	-6180.88	-5790.35	-5483.1	-5.23742	-4.54041	-3.88361	-5457.2	-5404.38	-4706.34
232.2	-5.31601	-4.43171	-4.71859	-6173.77	-5429.58	-5867.01	-4.22151	-4.05492	-4.10723	-4936.95	-4758.77	-6449.51	-5.84007	-4.20169	-4.70653	-5991.8	-5283.23	-4950.29	-5.40881	-5.11937	-4.37716	-6259.81	-5824.07	-5609.31	-5.32473	-4.61954	-3.92256	-5548.17	-5498.57	-4753.55
232.1	-5.39721	-4.51808	-4.83771	-6268.07	-5535.39	-6015.13	-4.31882	-4.11161	-4.18725	-5050.75	-4825.3	-6575.16	-5.93287	-4.25813	-4.77172	-6087.02	-5354.2	-5018.86	-5.47121	-5.15218	-4.47004	-6332.03	-5861.39	-5728.33	-5.41084	-4.69804	-3.96501	-5637.89	-5592.01	-4804.99
232	-5.47416	-4.60552	-4.95663	-6357.44	-5642.52	-6162.99	-4.42142	-4.15985	-4.27125	-5170.74	-4881.91	-6707.07	-6.03202	-4.31455	-4.83561	-6188.74	-5425.14	-5086.06	-5.52289	-5.18183	-4.56074	-6391.84	-5895.12	-5844.56	-5.48223	-4.77547	-4.01214	-5712.28	-5684.17	-4862.1
231.9	-5.54032	-4.69857	-5.06626	-6434.27	-5756.52	-6299.3	-4.51604	-4.20447	-4.35416	-5281.4	-4934.28	-6837.26	-6.12833	-4.37353	-4.89952	-6287.55	-5499.3	-5153.28	-5.56462	-5.21289	-4.64201	-6440.13	-5930.46	-5948.71	-5.55224	-4.84802	-4.0641	-5785.23	-5770.52	-4925.07
231.8	-5.60696	-4.78069	-5.16595	-6511.67	-5857.13	-6423.25	-4.60403	-4.24962	-4.43113	-5384.3	-4987.26	-6958.12	-6.20971	-4.43428	-4.96278	-6371.05	-5575.69	-5219.81	-5.59656	-5.23998	-4.73357	-6477.1	-5961.28	-6066.04	-5.61966	-4.91961	-4.12191	-5855.48	-5855.74	-4995.13
231.7	-5.66892	-4.85757	-5.26747	-6583.62	-5951.32	-6549.48	-4.68299	-4.2861	-4.50779	-5476.64	-5030.08	-7078.5	-6.28412	-4.48427	-5.01638	-6447.39	-5638.55	-5276.19	-5.61905	-5.26923	-4.82812	-6503.13	-5994.56	-6187.21	-5.6952	-4.98454	-4.18548	-5934.19	-5933.02	-5072.16
231.6	-5.7283	-4.93514	-5.3635	-6652.59	-6046.36	-6668.88	-4.76061	-4.32315	-4.58964	-5567.42	-5073.56	-7207.03	-6.35196	-4.53678	-5.06472	-6516.99	-5704.57	-5327.03	-5.63904	-5.30017	-4.90994	-6526.26	-6029.75	-6292.06	-5.77207	-5.0479	-4.25446	-6014.28	-6008.44	-5155.76
231.5	-5.79301	-5.00958	-5.45613	-6727.74	-6137.56	-6784.06	-4.83218	-4.36586	-4.67722	-5651.12	-5123.68	-7344.55	-6.4118	-4.59117	-5.11064	-6578.39	-5772.96	-5375.33	-5.65882	-5.33516	-4.99182	-6549.15	-6069.56	-6396.99	-5.84846	-5.11933	-4.32401	-6093.88	-6093.46	-5240.04
231.4	-5.8608	-5.08633	-5.5441	-6806.46	-6231.59	-6893.44	-4.89626	-4.42026	-4.76893	-5726.06	-5187.52	-7488.56	-6.46114	-4.65059	-5.16739	-6629.01	-5847.68	-5435.02	-5.68194	-5.36867	-5.06508	-6575.91	-6107.68	-6490.87	-5.92867	-5.18658	-4.40259	-6177.45	-6173.51	-5335.27
231.3	-5.93102	-5.17289	-5.63665	-6888.01	-6337.64	-7008.51	-4.95217	-4.48861	-4.8543	-5791.44	-5267.74	-7622.62	-6.51512	-4.71326	-5.23484	-6684.39	-5926.48	-5505.97	-5.69919	-5.40537	-5.13769	-6595.88	-6149.44	-6583.92	-6.00599	-5.25421	-4.49111	-6258.02	-6254.01	-5442.54
231.2	-6.00421	-5.26847	-5.70749	-6973.01	-6454.74	-7096.6	-5.00579	-4.55817	-4.93834	-5854.15	-5349.37	-7754.58	-6.56034	-4.77754	-5.3093	-6730.79	-6007.31	-5584.28	-5.71257	-5.44377	-5.20837	-6611.36	-6193.12	-6674.5	-6.08665	-5.32165	-4.5845	-6342.06	-6334.28	-5555.72
231.1	-6.07825	-5.34405	-5.77116	-7059	-6547.34	-7175.76	-5.05774	-4.62524	-5.02286	-5914.9	-5428.08	-7887.31	-6.59441	-4.84502	-5.38133	-6765.74	-6092.16	-5660.04	-5.72779	-5.47832	-5.28531	-6628.98	-6232.43	-6773.09	-6.15172	-5.39532	-4.67671	-6409.86	-6421.97	-5667.46
231	-6.15811	-5.4193	-5.83938	-7151.75	-6639.54	-7260.59	-5.10472	-4.69438	-5.10793	-5969.85	-5509.23	-8020.89	-6.62831	-4.91822	-5.44878	-6800.52	-6184.2	-5730.99	-5.74167	-5.51931	-5.35906	-6645.04	-6279.06	-6867.6	-6.22751	-5.46965	-4.77568	-6488.83	-6510.44	-5787.4
230.9	-6.23157	-5.49884	-5.89921	-7237.06	-6736.99	-7334.98	-5.14786	-4.7643	-5.18894	-6020.3	-5591.28	-8148.1	-6.66117	-4.99034	-5.51079	-6834.24	-6274.88	-5796.21	-5.75471	-5.56075	-5.43127	-6660.13	-6326.2	-6960.14	-6.3098	-5.5491	-4.87943	-6574.58	-6605.01	-5913.13
230.8	-6.3115	-5.57613	-5.95792	-7329.89	-6831.68	-7407.98	-5.18394	-4.8273	-5.26824	-6062.49	-5665.22	-8272.62	-6.70101	-5.05434	-5.56909	-6875.11	-6355.36	-5857.53	-5.77892	-5.60645	-5.50088	-6688.15	-6378.2	-7049.35	-6.39022	-5.62314	-4.98431	-6658.37	-6693.14	-6040.23
230.7	-6.38591	-5.65426	-6.01028	-7416.3	-6927.4	-7473.08	-5.21527	-4.89144	-5.35123	-6099.13	-5740.49	-8402.94	-6.74147	-5.11379	-5.63855	-6916.62	-6430.11	-5930.58	-5.80411	-5.66004	-5.56754	-6717.3	-6439.16	-7134.77	-6.47137	-5.68496	-5.08441	-6742.93	-6766.72	-6161.53
230.6	-6.45161	-5.73533	-6.05796	-7492.6	-7026.72	-7532.36	-5.23881	-4.96653	-5.43898	-6126.66	-5828.62	-8540.73	-6.78617	-5.17593	-5.71374	-6962.49	-6508.25	-6009.67	-5.82291	-5.72427	-5.63524	-6739.06	-6512.23	-7221.53	-6.55198	-5.75086	-5.18636	-6826.92	-6845.16	-6285.08
230.5	-6.52412	-5.81232	-6.10955	-7576.81	-7121.05	-7596.51	-5.2761	-5.04579	-5.52199	-6170.27	-5921.63	-8671.08	-6.83071	-5.23339	-5.79245	-7008.18	-6580.5	-6092.46	-5.85033	-5.78656	-5.70406	-6770.8	-6583.1	-7309.72	-6.63104	-5.82328	-5.28354	-6909.3	-6931.36	-6402.85
230.4	-6.60028	-5.88911	-6.15352	-7665.26	-7215.13	-7651.18	-5.30973	-5.13031	-5.59896	-6209.6	-6020.82	-8791.94	-6.86559	-5.29388	-5.87567	-7043.97	-6656.56	-6179.99	-5.88706	-5.85942	-5.781	-6813.3	-6665.99	-7408.32	-6.71628	-5.90663	-5.37609	-6998.11	-7030.57	-6515
230.3	-6.67676	-5.95249	-6.20055	-7754.08	-7292.78	-7709.66	-5.33591	-5.21428	-5.68065	-6240.22	-6119.37	-8920.22	-6.89436	-5.35513	-5.95478	-7073.49	-6733.57	-6263.19	-5.92356	-5.93717	-5.86131	-6855.55	-6754.44	-7511.24	-6.80338	-5.98825	-5.46394	-7088.87	-7127.72	-6621.46
230.2	-6.75425	-6.00915	-6.25324	-7844.08	-7362.2	-7775.17	-5.36241	-5.29891	-5.76331	-6271.21	-6218.69	-9050.02	-6.92593	-5.42119	-6.03197	-7105.88	-6816.64	-6344.38	-5.96701	-6.00998	-5.9263	-6905.83	-6837.27	-7594.52	-6.89407	-6.07792	-5.5503	-7183.36	-7234.46	-6726.12
230.1	-6.82448	-6.06586	-6.29933	-7925.64	-7431.68	-7832.48	-5.39453	-5.384	-5.84058	-6308.77	-6318.55	-9171.36	-6.95426	-5.50041	-6.11294	-7134.94	-6916.25	-6429.54	-6.008	-6.08737	-5.99453	-6953.27	-6925.32	-7681.96	-6.98067	-6.17418	-5.63083	-7273.6	-7349.03	-6823.71
230	-6.89299	-6.12604	-6.34008	-8005.2	-7505.41	-7883.15	-5.42857	-5.47697	-5.91845	-6348.58	-6427.66	-9293.63	-6.99596	-5.57613	-6.19379	-7177.73	-7011.46	-6514.58	-6.04374	-6.16394	-6.06203	-6994.64	-7012.43	-7768.46	-7.06383	-6.27644	-5.71112	-7360.25	-7470.75	-6921.01
229.9	-6.95666	-6.18829	-6.37901	-8079.15	-7581.68	-7931.55	-5.4609	-5.55783	-5.9812	-6386.39	-6522.55	-9392.17	-7.03768	-5.65473	-6.27556	-7220.53	-7110.29	-6600.59	-6.09603	-6.25086	-6.13336	-7055.15	-7111.31	-7859.87	-7.14161	-6.36596	-5.78982	-7441.29	-7577.3	-7016.38
229.8	-7.01304	-6.24494	-6.41842	-8144.62	-7651.08	-7980.55	-5.49633	-5.6284	-6.04005	-6427.82	-6605.37	-9484.58	-7.0857	-5.73391	-6.35233	-7269.8	-7209.85	-6681.33	-6.1454	-6.33669	-6.20025	-7112.29	-7208.95	-7945.58	-7.21436	-6.45219	-5.86317	-7517.09	-7679.94	-7105.27
229.7	-7.07405	-6.29464	-6.45442	-8215.48	-7711.97	-8025.32	-5.53431	-5.69101	-6.09811	-6472.24	-6678.85	-9575.75	-7.13815	-5.80752	-6.42797	-7323.61	-7302.41	-6760.89	-6.19286	-6.42201	-6.27159	-7167.22	-7306.02	-8037.01	-7.28761	-6.54094	-5.93555	-7593.42	-7785.58	-7192.98
229.6	-7.12677	-6.33394	-6.49556	-8276.7	-7760.12	-8076.47	-5.57347	-5.74634	-6.14782	-6518.04	-6743.78	-9653.81	-7.18951	-5.88376	-6.49983	-7376.3	-7398.28	-6836.47	-6.24253	-6.50832	-6.34917	-7224.7	-7404.21	-8136.42	-7.35457	-6.62735	-6.0051	-7663.19	-7888.43	-7277.27
229.5	-7.18428	-6.36992	-6.53514	-8343.49	-7804.2	-8125.68	-5.61352	-5.80303	-6.1943	-6564.87	-6810.31	-9726.8	-7.23701	-5.96268	-6.56987	-7425.04	-7497.51	-6910.14	-6.29711	-6.60184	-6.42193	-7287.87	-7510.6	-8229.67	-7.43612	-6.71024	-6.07769	-7748.16	-7987.1	-7365.24
229.4	-7.24448	-6.40869	-6.57325	-8413.41	-7851.7	-8173.07	-5.65559	-5.8665	-6.23524	-6614.07	-6884.8	-9791.08	-7.28145	-6.03706	-6.64509	-7470.63	-7591.04	-6989.26	-6.36267	-6.68704	-6.49792	-7363.74	-7607.53	-8327.05	-7.52051	-6.7889	-6.14855	-7836.09	-8080.72	-7451.11
229.3	-7.31132	-6.44934	-6.6182	-8491.03	-7901.5	-8228.96	-5.70519	-5.93016	-6.27893	-6672.08	-6959.51	-9859.69	-7.33307	-6.11119	-6.72336	-7523.59	-7684.25	-7071.58	-6.42689	-6.76769	-6.56026	-7438.07	-7699.28	-8406.94	-7.61096	-6.86984	-6.20943	-7930.34	-8177.07	-7524.88
229.2	-7.37769	-6.48504	-6.66202	-8568.11	-7945.24	-8283.44	-5.75312	-5.9946	-6.31516	-6728.13	-7035.14	-9916.58	-7.38505	-6.19861	-6.8014	-7576.93	-7794.17	-7153.66	-6.49644	-6.84811	-6.6336	-7518.56	-7790.77	-8500.92	-7.69374	-6.95091	-6.27661	-8016.59	-8273.56	-7606.3
229.1	-7.43932	-6.51836	-6.70237	-8639.69	-7986.07	-8333.61	-5.80406	-6.0604	-6.35185	-6787.71	-7112.36	-9974.19	-7.43947	-6.28516	-6.88555	-7632.76	-7903	-7242.17	-6.56208	-6.92882	-6.70688	-7594.53	-7882.59	-8594.83	-7.77699	-7.02602	-6.34171	-8103.33	-8362.96	-7685.19
229	-7.49627	-6.55395	-6.74259	-8705.82	-8029.67	-8383.62	-5.85558	-6.12194	-6.39349	-6847.96	-7184.58	-10039.6	-7.49601	-6.36612	-6.97019	-7690.77	-8004.8	-7331.19	-6.62727	-7.00546	-6.77705	-7669.98	-7969.78	-8684.75	-7.85744	-7.0992	-6.39749	-8187.16	-8450.07	-7752.78
228.9	-7.54742	-6.58589	-6.78044	-8765.23	-8068.8	-8430.68	-5.90333	-6.1696	-6.42339	-6903.8	-7240.51	-10086.5	-7.56079	-6.44712	-7.04108	-7757.23	-8106.65	-7405.75	-6.68804	-7.07956	-6.83989	-7740.31	-8054.08	-8765.28	-7.93731	-7.16504	-6.44763	-8270.38	-8528.44	-7813.55
228.8	-7.597	-6.62003	-6.82395	-8822.81	-8110.63	-8484.78	-5.94802	-6.20962	-6.46498	-6956.06	-7287.48	-10151.8	-7.62369	-6.52485	-7.10446	-7821.77	-8204.39	-7472.42	-6.74763	-7.14891	-6.89552	-7809.27	-8132.98	-8836.57	-8.00831	-7.22456	-6.50233	-8344.36	-8599.28	-7879.83
228.7	-7.64076	-6.65026	-6.87744	-8873.63	-8147.66	-8551.29	-5.99882	-6.24531	-6.502	-7015.47	-7329.36	-10210	-7.68703	-6.6063	-7.15863	-7886.75	-8306.8	-7529.39	-6.80336	-7.21476	-6.95045	-7873.77	-8207.89	-8906.96	-8.0731	-7.28074	-6.56419	-8411.87	-8666.15	-7954.8
228.6	-7.67967	-6.68548	-6.92713	-8918.82	-8190.82	-8613.07	-6.0567	-6.28051	-6.53647	-7083.16	-7370.67	-10264.1	-7.75655	-6.67513	-7.21294	-7958.08	-8393.35	-7586.52	-6.85892	-7.27861	-7.00336	-7938.07	-8280.53	-8974.77	-8.1437	-7.33225	-6.6314	-8485.43	-8727.46	-8036.25
228.5	-7.72218	-6.72099	-6.96563	-8968.19	-8234.32	-8660.95	-6.11127	-6.30671	-6.57483	-7146.98	-7401.42	-10324.3	-7.83012	-6.73445	-7.27378	-8033.56	-8467.94	-7650.51	-6.91146	-7.34473	-7.0607	-7998.88	-8355.75	-9048.25	-8.20578	-7.37409	-6.69723	-8550.12	-8777.27	-8116.02
228.4	-7.77191	-6.7477	-7.00488	-9025.94	-8267.04	-8709.75	-6.17061	-6.32529	-6.60507	-7216.38	-7423.23	-10371.8	-7.89982	-6.79356	-7.33626	-8105.07	-8542.26	-7716.22	-6.96985	-7.40789	-7.1239	-8066.46	-8427.61	-9129.24	-8.26203	-7.41819	-6.76798	-8608.73	-8829.76	-8201.76
228.3	-7.82338	-6.77323	-7.04725	-9085.71	-8298.32	-8762.43	-6.23268	-6.33969	-6.63364	-7288.97	-7440.13	-10416.7	-7.95893	-6.8519	-7.40092	-8165.72	-8615.62	-7784.23	-7.02319	-7.47194	-7.18462	-8128.19	-8500.48	-9207.05	-8.31815	-7.46584	-6.83619	-8667.2	-8886.48	-8284.42
228.2	-7.87881	-6.78673	-7.08964	-9150.09	-8314.86	-8815.14	-6.30345	-6.34785	-6.65851	-7371.73	-7449.7	-10455.7	-8.01285	-6.90246	-7.46247	-8221.04	-8679.19	-7848.97	-7.07003	-7.5279	-7.24209	-8182.4	-8564.14	-9280.7	-8.37505	-7.5144	-6.91297	-8726.49	-8944.28	-8377.47
228.1	-7.94046	-6.80423	-7.1357	-9221.69	-8336.3	-8872.41	-6.37378	-6.35605	-6.68193	-7453.98	-7459.33	-10492.5	-8.06438	-6.95437	-7.51752	-8273.91	-8744.47	-7906.87	-7.11789	-7.57847	-7.29712	-8237.79	-8621.67	-9351.22	-8.43326	-7.55891	-6.99571	-8787.14	-8997.25	-8477.74
228	-7.99094	-6.83169	-7.17208	-9280.31	-8369.95	-8917.64	-6.43921	-6.36238	-6.70677	-7530.5	-7466.76	-10531.5	-8.12514	-7.0125	-7.57083	-8336.24	-8817.56	-7962.94	-7.16198	-7.62792	-7.34469	-8288.81	-8677.93	-9412.18	-8.48994	-7.5997	-7.08485	-8846.2	-9045.81	-8585.76
227.9	-8.04062	-6.86444	-7.22056	-9338.01	-8410.07	-8977.92	-6.50657	-6.36899	-6.73947	-7609.27	-7474.51	-10582.9	-8.18607	-7.07846	-7.62149	-8398.76	-8900.5	-8016.23	-7.19814	-7.67017	-7.38102	-8330.66	-8725.99	-9458.73	-8.54091	-7.63733	-7.1799	-8899.31	-9090.6	-8700.95
227.8	-8.08781	-6.89572	-7.25909	-9392.81	-8448.39	-9025.83	-6.57286	-6.36803	-6.77182	-7686.8	-7473.39	-10633.7	-8.25092	-7.14222	-7.66877	-8465.29	-8980.67	-8065.95	-7.23098	-7.70652	-7.4097	-8368.67	-8767.35	-9495.49	-8.58655	-7.67221	-7.28046	-8946.86	-9132.11	-8822.81
227.7	-8.13221	-6.93011	-7.29488	-9444.38	-8490.53	-9070.33	-6.63234	-6.36538	-6.80363	-7756.36	-7470.28	-10683.6	-8.31102	-7.19646	-7.71539	-8526.95	-9048.87	-8114.99	-7.25822	-7.75318	-7.44651	-8400.2	-8820.43	-9542.66	-8.62801	-7.7012	-7.38582	-8990.06	-9166.62	-8950.49
227.6	-8.17883	-6.97175	-7.33509	-9498.52	-8541.54	-9120.33	-6.68247	-6.36602	-6.83647	-7814.99	-7471.03	-10735.2	-8.38194	-7.24431	-7.74792	-8599.72	-9109.04	-8149.2	-7.28993	-7.79357	-7.47494	-8436.9	-8866.38	-9579.09	-8.66816	-7.72001	-7.49	-9031.9	-9189.01	-9076.74
227.5	-8.22894	-7.00574	-7.3787	-9556.71	-8583.19	-9174.55	-6.73134	-6.36699	-6.86626	-7872.14	-7472.17	-10782	-8.44663	-7.28288	-7.77694	-8666.09	-9157.54	-8179.73	-7.32773	-7.83487	-7.49717	-8480.64	-8913.36	-9607.58	-8.70453	-7.73928	-7.58655	-9069.79	-9211.95	-9193.74
227.4	-8.28145	-7.03852	-7.41997	-9617.7	-8623.35	-9225.86	-6.77441	-6.36887	-6.90083	-7922.51	-7474.37	-10836.2	-8.50115	-7.31908	-7.80601	-8722.02	-9203.06	-8210.3	-7.36265	-7.87433	-7.50415	-8521.06	-8958.26	-9616.53	-8.7459	-7.76383	-7.67962	-9112.9	-9241.17	-9306.53
227.3	-8.34188	-7.06814	-7.45592	-9687.88	-8659.64	-9270.56	-6.81865	-6.37823	-6.93322	-7974.24	-7485.36	-10887.1	-8.54627	-7.35042	-7.83961	-8768.32	-9242.46	-8245.64	-7.40086	-7.91382	-7.52095	-8565.28	-9003.18	-9638.05	-8.78633	-7.78633	-7.78254	-9155.03	-9267.95	-9431.25
227.2	-8.39359	-7.0929	-7.49097	-9747.93	-8689.97	-9314.14	-6.86862	-6.39181	-6.96124	-8032.68	-7501.29	-10931.1	-8.59982	-7.38127	-7.87839	-8823.26	-9281.25	-8286.43	-7.44372	-7.94913	-7.5355	-8614.88	-9043.35	-9656.7	-8.81954	-7.80203	-7.8774	-9189.63	-9286.64	-9546.21
227.1	-8.44491	-7.12106	-7.51758	-9807.53	-8724.47	-9347.23	-6.91676	-6.4059	-6.99672	-8088.98	-7517.83	-10986.8	-8.65601	-7.40583	-7.9211	-8880.91	-9312.14	-8331.35	-7.48882	-7.9876	-7.55241	-8667.08	-9087.12	-9678.37	-8.86249	-7.82439	-7.97285	-9234.38	-9313.25	-9661.88
227	-8.49035	-7.14518	-7.54362	-9860.3	-8754.02	-9379.61	-6.96333	-6.42768	-7.0339	-8143.44	-7543.39	-11045.2	-8.71349	-7.42962	-7.96059	-8939.88	-9342.05	-8372.89	-7.52342	-8.02646	-7.57271	-8707.12	-9131.33	-9704.38	-8.89601	-7.84678	-8.06006	-9269.31	-9339.9	-9767.57
226.9	-8.53834	-7.16415	-7.58177	-9916.04	-8777.26	-9427.04	-7.01667	-6.44515	-7.06798	-8205.82	-7563.89	-11098.7	-8.76865	-7.4586	-7.98946	-8996.47	-9378.49	-8403.25	-7.558	-8.06449	-7.59419	-8747.14	-9174.59	-9731.91	-8.93257	-7.87091	-8.14483	-9307.4	-9368.62	-9870.29
226.8	-8.57134	-7.18363	-7.62112	-9954.36	-8801.13	-9475.97	-7.05697	-6.46687	-7.10123	-8252.95	-7589.38	-11150.9	-8.82557	-7.48871	-8.01097	-9054.87	-9416.35	-8425.88	-7.59548	-8.10304	-7.6149	-8790.52	-9218.45	-9758.45	-8.9611	-7.89027	-8.22714	-9337.13	-9391.67	-9970.04
226.7	-8.60539	-7.1982	-7.65757	-9993.91	-8818.98	-9521.29	-7.09365	-6.49376	-7.13972	-8295.85	-7620.94	-11211.4	-8.88402	-7.50664	-8.03404	-9114.84	-9438.89	-8450.14	-7.63277	-8.14294	-7.6269	-8833.68	-9263.84	-9773.83	-8.99186	-7.91166	-8.29446	-9369.18	-9417.13	-10051.6
226.6	-8.64167	-7.21815	-7.69616	-10036	-8843.42	-9569.27	-7.12403	-6.51723	-7.17465	-8331.38	-7648.48	-11266.2	-8.94615	-7.52691	-8.06228	-9178.59	-9464.38	-8479.85	-7.67616	-8.18168	-7.64141	-8883.89	-9307.91	-9792.42	-9.02266	-7.93966	-8.35131	-9401.27	-9450.46	-10120.5
226.5	-8.66924	-7.23394	-7.73033	-10068.1	-8862.77	-9611.76	-7.15124	-6.54429	-7.20397	-8363.2	-7680.24	-11312.3	-9.00021	-7.54619	-8.08243	-9234.05	-9488.62	-8501.04	-7.71895	-8.22434	-7.65579	-8933.42	-9356.45	-9810.85	-9.05387	-7.96289	-8.40163	-9433.79	-9478.11	-10181.5
226.4	-8.69706	-7.24938	-7.76267	-10100.4	-8881.69	-9651.97	-7.18386	-6.56075	-7.23717	-8401.35	-7699.56	-11364.4	-9.04252	-7.55736	-8.1057	-9277.46	-9502.67	-8525.51	-7.76335	-8.26271	-7.67388	-8984.8	-9400.1	-9834.03	-9.07682	-7.98195	-8.45167	-9457.71	-9500.79	-10242.1
226.3	-8.72442	-7.25191	-7.7871	-10132.1	-8884.79	-9682.35	-7.22305	-6.57114	-7.25959	-8447.18	-7711.75	-11399.6	-9.08338	-7.56912	-8.13317	-9319.38	-9517.46	-8554.41	-7.81969	-8.30664	-7.6973	-9050.01	-9450.07	-9864.05	-9.09932	-8.00244	-8.49057	-9481.15	-9525.18	-10289.3
226.2	-8.74888	-7.25212	-7.80202	-10160.5	-8885.04	-9700.9	-7.25313	-6.58182	-7.28374	-8482.36	-7724.29	-11437.5	-9.13657	-7.57533	-8.16443	-9373.95	-9525.27	-8587.29	-7.88187	-8.35445	-7.72622	-9121.97	-9504.47	-9901.11	-9.12884	-8.02521	-8.51925	-9511.91	-9552.28	-10324
226.1	-8.77388	-7.25771	-7.8192	-10189.6	-8891.89	-9722.26	-7.28281	-6.58523	-7.30759	-8517.07	-7728.29	-11475	-9.18182	-7.59692	-8.19066	-9420.38	-9552.41	-8614.87	-7.9425	-8.40521	-7.7404	-9192.14	-9562.21	-9919.28	-9.15815	-8.0486	-8.5443	-9542.45	-9580.13	-10354.4
226	-8.78914	-7.25523	-7.84514	-10207.3	-8888.85	-9754.51	-7.32016	-6.58999	-7.32394	-8560.75	-7733.87	-11500.6	-9.21359	-7.61942	-8.21576	-9452.97	-9580.7	-8641.27	-8.00816	-8.44833	-7.75188	-9268.13	-9611.27	-9933.99	-9.19501	-8.07282	-8.5657	-9580.86	-9608.95	-10380.3
225.9	-8.80318	-7.25499	-7.86683	-10223.6	-8888.56	-9781.48	-7.35403	-6.59624	-7.34073	-8600.36	-7741.21	-11527	-9.25189	-7.63945	-8.23976	-9492.27	-9605.89	-8666.52	-8.0713	-8.4888	-7.75715	-9341.2	-9657.31	-9940.74	-9.23017	-8.09562	-8.58507	-9617.49	-9636.09	-10403.8
225.8	-8.81485	-7.25208	-7.87994	-10237.2	-8884.99	-9797.78	-7.38162	-6.61432	-7.36241	-8632.62	-7762.43	-11561.1	-9.28889	-7.66585	-8.25997	-9530.23	-9639.09	-8687.77	-8.12895	-8.52621	-7.77027	-9407.92	-9699.87	-9957.56	-9.25908	-8.11705	-8.61077	-9647.62	-9661.6	-10434.9
225.7	-8.83298	-7.26116	-7.88897	-10258.2	-8896.12	-9809.01	-7.41052	-6.6357	-7.38009	-8666.42	-7787.52	-11588.8	-9.32526	-7.70552	-8.27507	-9567.55	-9688.97	-8703.66	-8.19323	-8.56426	-7.79288	-9482.32	-9743.16	-9986.53	-9.27634	-8.14193	-8.63083	-9665.6	-9691.21	-10459.3
225.6	-8.85077	-7.26764	-7.90105	-10278.9	-8904.06	-9824.03	-7.4367	-6.65571	-7.39736	-8697.04	-7811	-11615.9	-9.35818	-7.73658	-8.28731	-9601.32	-9728.02	-8716.53	-8.2605	-8.59848	-7.81726	-9560.17	-9782.09	-10017.8	-9.29617	-8.16809	-8.64562	-9686.26	-9722.35	-10477.2
225.5	-8.87486	-7.26965	-7.91841	-10306.9	-8906.52	-9845.62	-7.46938	-6.68177	-7.40968	-8735.26	-7841.58	-11635.3	-9.37994	-7.77265	-8.29862	-9623.65	-9773.38	-8728.43	-8.32208	-8.62721	-7.84194	-9631.44	-9814.77	-10049.4	-9.32269	-8.18289	-8.65546	-9713.89	-9739.97	-10489.1
225.4	-8.9068	-7.26288	-7.92892	-10343.9	-8898.23	-9858.68	-7.49109	-6.69959	-7.41704	-8760.65	-7862.5	-11646.8	-9.40561	-7.80085	-8.3148	-9649.98	-9808.84	-8745.44	-8.38895	-8.64957	-7.86454	-9708.83	-9840.21	-10078.4	-9.34247	-8.19289	-8.66288	-9734.5	-9751.87	-10498.1
225.3	-8.93118	-7.26181	-7.94016	-10372.3	-8896.91	-9872.66	-7.50548	-6.72381	-7.42438	-8777.48	-7890.92	-11658.4	-9.4267	-7.83135	-8.33601	-9671.62	-9847.19	-8767.75	-8.45937	-8.67322	-7.88097	-9790.33	-9867.12	-10099.4	-9.35345	-8.20435	-8.66605	-9745.95	-9765.51	-10501.9
225.2	-8.95739	-7.26443	-7.95156	-10402.7	-8900.12	-9886.83	-7.52185	-6.74594	-7.42624	-8796.62	-7916.89	-11661.3	-9.44498	-7.8657	-8.35865	-9690.38	-9890.38	-8791.56	-8.52859	-8.68739	-7.90853	-9870.44	-9883.24	-10134.7	-9.37394	-8.21909	-8.66726	-9767.3	-9783.06	-10503.4
225.1	-8.98544	-7.26227	-7.96253	-10435.3	-8897.48	-9900.47	-7.5369	-6.76113	-7.43244	-8814.22	-7934.72	-11671	-9.45618	-7.89431	-8.3863	-9701.87	-9926.35	-8820.65	-8.59355	-8.70397	-7.93675	-9945.62	-9902.1	-10170.9	-9.39493	-8.23359	-8.66848	-9789.17	-9800.32	-10504.9
225	-9.01117	-7.26776	-7.97728	-10465.2	-8904.2	-9918.81	-7.54505	-6.77687	-7.44058	-8823.75	-7953.19	-11683.8	-9.45536	-7.92784	-8.40749	-9701.03	-9968.51	-8842.93	-8.65433	-8.71568	-7.96962	-10016	-9915.42	-10213	-9.4177	-8.23832	-8.67262	-9812.89	-9805.95	-10509.9
224.9	-9.03748	-7.27448	-7.99385	-10495.7	-8912.44	-9939.42	-7.5549	-6.79071	-7.44896	-8835.27	-7969.43	-11697	-9.45877	-7.96209	-8.43318	-9704.52	-10011.6	-8869.96	-8.71434	-8.72394	-8.01234	-10085.4	-9924.82	-10267.8	-9.43013	-8.2423	-8.67872	-9825.84	-9810.68	-10517.3
224.8	-9.05904	-7.28642	-8.00859	-10520.8	-8927.07	-9957.74	-7.55994	-6.8044	-7.46105	-8841.16	-7985.5	-11716	-9.47172	-7.99752	-8.45294	-9717.81	-10056.1	-8890.74	-8.7716	-8.72809	-8.05614	-10151.7	-9929.54	-10323.9	-9.44774	-8.2506	-8.67923	-9844.19	-9820.56	-10517.9
224.7	-9.08747	-7.30743	-8.02025	-10553.8	-8952.81	-9972.24	-7.55773	-6.82595	-7.48002	-8838.58	-8010.79	-11745.7	-9.47241	-8.0268	-8.4605	-9718.52	-10092.9	-8898.69	-8.8251	-8.7386	-8.09884	-10213.6	-9941.5	-10378.6	-9.47427	-8.26612	-8.69182	-9871.84	-9839.04	-10533.2
224.6	-9.11635	-7.32653	-8.04015	-10587.3	-8976.21	-9996.99	-7.55015	-6.85074	-7.49465	-8829.72	-8039.88	-11768.7	-9.4598	-8.05695	-8.46699	-9705.58	-10130.9	-8905.52	-8.87525	-8.74687	-8.13237	-10271.6	-9950.9	-10421.6	-9.49184	-8.27751	-8.70609	-9890.14	-9852.59	-10550.5
224.5	-9.14471	-7.34641	-8.06394	-10620.2	-9000.56	-10026.6	-7.54309	-6.87609	-7.51209	-8821.46	-8069.63	-11796.1	-9.44903	-8.0757	-8.47082	-9694.53	-10154.4	-8909.54	-8.93741	-8.74801	-8.17072	-10343.6	-9952.2	-10470.7	-9.51106	-8.28931	-8.71903	-9910.17	-9866.64	-10566.1
224.4	-9.17436	-7.36053	-8.07792	-10654.7	-9017.86	-10043.9	-7.52387	-6.90558	-7.53209	-8798.98	-8104.24	-11827.5	-9.44755	-8.09271	-8.47974	-9693.01	-10175.8	-8918.93	-8.98341	-8.75879	-8.21413	-10396.8	-9964.46	-10526.4	-9.52068	-8.30473	-8.73059	-9920.19	-9884.99	-10580.1
224.3	-9.20387	-7.37747	-8.09212	-10689	-9038.62	-10061.6	-7.51602	-6.92417	-7.55793	-8789.8	-8126.06	-11868.1	-9.44109	-8.09592	-8.49303	-9686.38	-10179.9	-8932.9	-9.03354	-8.77592	-8.26184	-10454.8	-9983.95	-10587.5	-9.53327	-8.31507	-8.74095	-9933.31	-9897.3	-10592.7
224.2	-9.23091	-7.39506	-8.10994	-10720.4	-9060.17	-10083.8	-7.50825	-6.93587	-7.58723	-8780.71	-8139.79	-11914.1	-9.43878	-8.09406	-8.50759	-9684.01	-10177.5	-8948.22	-9.07914	-8.79075	-8.30765	-10507.6	-10000.8	-10646.2	-9.54621	-8.32512	-8.74944	-9946.79	-9909.26	-10603
224.1	-9.24735	-7.40607	-8.13428	-10739.4	-9073.66	-10114	-7.49516	-6.94085	-7.61977	-8765.41	-8145.64	-11965.2	-9.42687	-8.08347	-8.51708	-9671.8	-10164.2	-8958.2	-9.11471	-8.80701	-8.34444	-10548.8	-10019.3	-10693.4	-9.56394	-8.33811	-8.76314	-9965.27	-9924.72	-10619.6
224	-9.27159	-7.41978	-8.16476	-10767.6	-9090.45	-10151.9	-7.48074	-6.94338	-7.65337	-8748.54	-8148.6	-12017.9	-9.41962	-8.06581	-8.52506	-9664.36	-10142	-8966.59	-9.14286	-8.82082	-8.37685	-10581.4	-10035	-10734.9	-9.58368	-8.35984	-8.77997	-9985.84	-9950.59	-10640
223.9	-9.29482	-7.43463	-8.20235	-10794.6	-9108.65	-10198.7	-7.46247	-6.95157	-7.68831	-8727.18	-8158.22	-12072.8	-9.41164	-8.04733	-8.53303	-9656.17	-10118.8	-8974.98	-9.16594	-8.83765	-8.41027	-10608.1	-10054.2	-10777.7	-9.60035	-8.38763	-8.7957	-10003.2	-9983.67	-10659
223.8	-9.31022	-7.45711	-8.23293	-10812.5	-9136.19	-10236.7	-7.44568	-6.9566	-7.72167	-8707.54	-8164.12	-12125.2	-9.40764	-8.03498	-8.53935	-9652.07	-10103.2	-8981.62	-9.17553	-8.8464	-8.44959	-10619.2	-10064.1	-10828.1	-9.61608	-8.41955	-8.80962	-10019.6	-10021.7	-10675.9
223.7	-9.32527	-7.48473	-8.26691	-10829.9	-9170.03	-10278.9	-7.43877	-6.96238	-7.75648	-8699.46	-8170.9	-12179.9	-9.39565	-8.02228	-8.5415	-9639.76	-10087.3	-8983.89	-9.17725	-8.85871	-8.48445	-10621.2	-10078.1	-10872.8	-9.63377	-8.4459	-8.82788	-10038	-10053	-10698
223.6	-9.34267	-7.51366	-8.30316	-10850.1	-9205.47	-10324	-7.42861	-6.9691	-7.79437	-8687.58	-8178.79	-12239.4	-9.39239	-8.00172	-8.53963	-9636.42	-10061.4	-8981.92	-9.17659	-8.86268	-8.53051	-10620.4	-10082.7	-10931.8	-9.65005	-8.4681	-8.84377	-10055	-10079.4	-10717.3
223.5	-9.3614	-7.54676	-8.33243	-10871.9	-9246.02	-10360.4	-7.42361	-6.98229	-7.83564	-8681.73	-8194.27	-12304.2	-9.40137	-7.98072	-8.53403	-9645.63	-10035	-8976.03	-9.17243	-8.86788	-8.57641	-10615.6	-10088.6	-10990.6	-9.65672	-8.49848	-8.86413	-10061.9	-10115.6	-10742
223.4	-9.3785	-7.58307	-8.36726	-10891.8	-9290.51	-10403.7	-7.4278	-6.99839	-7.87673	-8686.63	-8213.16	-12368.7	-9.41402	-7.95584	-8.52152	-9658.61	-10003.7	-8962.87	-9.16245	-8.87946	-8.61127	-10604	-10101.7	-11035.3	-9.66364	-8.52731	-8.88607	-10069.2	-10149.9	-10768.6
223.3	-9.39326	-7.62106	-8.40744	-10908.9	-9337.05	-10453.7	-7.43559	-7.01655	-7.91138	-8695.74	-8234.48	-12423.1	-9.43166	-7.93411	-8.5155	-9676.71	-9976.4	-8956.54	-9.1587	-8.88653	-8.64001	-10599.7	-10109.8	-11072.1	-9.67455	-8.56063	-8.90587	-10080.5	-10189.6	-10792.6
223.2	-9.40058	-7.64702	-8.45457	-10917.4	-9368.86	-10512.3	-7.43032	-7.04643	-7.95141	-8689.58	-8269.54	-12486	-9.45086	-7.90376	-8.51153	-9696.41	-9938.24	-8952.36	-9.14819	-8.89159	-8.6579	-10587.5	-10115.5	-11095	-9.69529	-8.58774	-8.92441	-10102.1	-10221.9	-10815
223.1	-9.40813	-7.66762	-8.49964	-10926.2	-9394.1	-10568.3	-7.4343	-7.07779	-7.98861	-8694.23	-8306.35	-12544.4	-9.47129	-7.87236	-8.50765	-9717.37	-9898.75	-8948.28	-9.13517	-8.89337	-8.67605	-10572.5	-10117.6	-11118.3	-9.71198	-8.61378	-8.94107	-10119.5	-10252.9	-10835.2
223	-9.41237	-7.69032	-8.54164	-10931.1	-9421.91	-10620.5	-7.42306	-7.09199	-8.01491	-8681.09	-8323.01	-12585.7	-9.50108	-7.83697	-8.50976	-9747.93	-9854.25	-8950.5	-9.12428	-8.89686	-8.69211	-10559.9	-10121.5	-11138.9	-9.73283	-8.64314	-8.95946	-10141.2	-10287.8	-10857.5
222.9	-9.40375	-7.72317	-8.57924	-10921.1	-9462.16	-10667.3	-7.4203	-7.10302	-8.03939	-8677.86	-8335.95	-12624.1	-9.53572	-7.81514	-8.50156	-9783.47	-9826.8	-8941.88	-9.10795	-8.90473	-8.71239	-10541	-10130.5	-11164.9	-9.75368	-8.67337	-8.98429	-10163	-10323.8	-10887.6
222.8	-9.39504	-7.7547	-8.61695	-10911	-9500.79	-10714.2	-7.42093	-7.11639	-8.06559	-8678.6	-8351.65	-12665.2	-9.56971	-7.79671	-8.48657	-9818.35	-9803.63	-8926.11	-9.08287	-8.91158	-8.74173	-10511.9	-10138.3	-11202.5	-9.77557	-8.70554	-9.00491	-10185.8	-10362.1	-10912.6
222.7	-9.38544	-7.792	-8.65651	-10899.8	-9546.48	-10763.4	-7.42668	-7.12477	-8.09879	-8685.32	-8361.48	-12717.4	-9.60608	-7.77537	-8.47651	-9855.66	-9776.8	-8915.53	-9.06327	-8.9224	-8.75896	-10489.2	-10150.6	-11224.6	-9.7853	-8.73658	-9.02488	-10195.9	-10399	-10936.8
222.6	-9.37735	-7.82379	-8.68819	-10890.4	-9585.43	-10802.7	-7.4337	-7.14349	-8.13055	-8693.53	-8383.45	-12767.3	-9.64049	-7.76764	-8.4752	-9890.97	-9767.08	-8914.15	-9.03876	-8.933	-8.7737	-10460.9	-10162.7	-11243.4	-9.79254	-8.77691	-9.05034	-10203.5	-10447	-10967.6
222.5	-9.36659	-7.85854	-8.71554	-10877.9	-9628.01	-10836.8	-7.45107	-7.15527	-8.15325	-8713.84	-8397.27	-12802.9	-9.67619	-7.76771	-8.47675	-9927.59	-9767.17	-8915.78	-9.01837	-8.93936	-8.78293	-10437.3	-10169.9	-11255.3	-9.79997	-8.81976	-9.08201	-10211.2	-10498	-11006
222.4	-9.3553	-7.88139	-8.73765	-10864.8	-9656	-10864.2	-7.47505	-7.17948	-8.17231	-8741.89	-8425.69	-12832.8	-9.72148	-7.77	-8.47363	-9974.06	-9770.04	-8912.5	-9.00311	-8.94421	-8.80173	-10419.6	-10175.4	-11279.4	-9.81448	-8.85671	-9.10915	-10226.3	-10542	-11038.9
222.3	-9.34706	-7.89976	-8.75853	-10855.2	-9678.51	-10890.2	-7.49956	-7.19987	-8.18289	-8770.55	-8449.62	-12849.4	-9.76109	-7.77701	-8.47205	-10014.7	-9778.86	-8910.84	-8.98852	-8.95537	-8.81781	-10402.7	-10188.1	-11300	-9.82281	-8.88215	-9.14218	-10235	-10572.3	-11078.9
222.2	-9.33164	-7.91544	-8.78092	-10837.3	-9697.72	-10918	-7.52233	-7.21363	-8.18563	-8797.18	-8465.76	-12853.7	-9.81332	-7.79196	-8.48518	-10068.3	-9797.66	-8924.65	-8.97611	-8.96717	-8.83403	-10388.4	-10201.5	-11320.8	-9.82594	-8.90812	-9.1686	-10238.3	-10603.2	-11110.9
222.1	-9.31693	-7.93005	-8.79603	-10820.3	-9715.62	-10936.8	-7.54521	-7.22946	-8.19346	-8823.94	-8484.34	-12866	-9.86765	-7.79935	-8.49341	-10124	-9806.95	-8933.3	-8.96366	-8.97621	-8.84559	-10374	-10211.8	-11335.6	-9.83248	-8.93223	-9.18863	-10245.1	-10631.9	-11135.2
222	-9.30092	-7.948	-8.79939	-10801.7	-9737.61	-10941	-7.56731	-7.23597	-8.19835	-8849.78	-8491.98	-12873.7	-9.91129	-7.81693	-8.50661	-10168.8	-9829.05	-8947.19	-8.95693	-8.98622	-8.84643	-10366.2	-10223.2	-11336.6	-9.83939	-8.96386	-9.2064	-10252.3	-10669.5	-11156.8
221.9	-9.28405	-7.96949	-8.80107	-10782.1	-9763.94	-10943.1	-7.59072	-7.24217	-8.20652	-8877.16	-8499.26	-12886.5	-9.93992	-7.83156	-8.51905	-10198.2	-9847.45	-8960.27	-8.95496	-8.98843	-8.8398	-10363.9	-10225.7	-11328.2	-9.84802	-8.99572	-9.22576	-10261.3	-10707.5	-11180.2
221.8	-9.2757	-7.99181	-8.8015	-10772.4	-9791.28	-10943.6	-7.61127	-7.25277	-8.20983	-8901.19	-8511.7	-12891.7	-9.96751	-7.85335	-8.53763	-10226.5	-9874.85	-8979.81	-8.95089	-8.99003	-8.82796	-10359.2	-10227.5	-11313	-9.85679	-9.02812	-9.24376	-10270.4	-10746	-11202
221.7	-9.26698	-8.01186	-8.79022	-10762.2	-9815.85	-10929.6	-7.63356	-7.26474	-8.21022	-8927.26	-8525.75	-12892.4	-9.98158	-7.88595	-8.55704	-10240.9	-9915.84	-9000.23	-8.94836	-8.99033	-8.82308	-10356.3	-10227.9	-11306.7	-9.85885	-9.05691	-9.26551	-10272.6	-10780.3	-11228.4
221.6	-9.26646	-8.03792	-8.76825	-10761.6	-9847.78	-10902.3	-7.66511	-7.28654	-8.20808	-8964.16	-8551.33	-12889	-10.0037	-7.91426	-8.57976	-10263.6	-9951.44	-9024.13	-8.94715	-8.98948	-8.82884	-10354.9	-10226.9	-11314.1	-9.85812	-9.07016	-9.27992	-10271.8	-10796.1	-11245.9
221.5	-9.26705	-8.06353	-8.74151	-10762.3	-9879.15	-10869	-7.70192	-7.30721	-8.20316	-9007.21	-8575.59	-12881.3	-10.0211	-7.9446	-8.60894	-10281.5	-9989.59	-9054.82	-8.95782	-8.99879	-8.83565	-10367.2	-10237.5	-11322.8	-9.86094	-9.08007	-9.2994	-10274.7	-10807.9	-11269.5
221.4	-9.27296	-8.08996	-8.7124	-10769.2	-9911.53	-10832.8	-7.74624	-7.32259	-8.19432	-9059.04	-8593.64	-12867.4	-10.0432	-7.97895	-8.64278	-10304.1	-10032.8	-9090.41	-8.97415	-9.01136	-8.83993	-10386.1	-10251.8	-11328.3	-9.86415	-9.08021	-9.32088	-10278.1	-10808	-11295.5
221.3	-9.28406	-8.10486	-8.68862	-10782.1	-9929.79	-10803.3	-7.78502	-7.34562	-8.19373	-9104.39	-8620.66	-12866.5	-10.0556	-8.00954	-8.67572	-10316.9	-10071.2	-9125.06	-8.99062	-9.02306	-8.83844	-10405.2	-10265.1	-11326.4	-9.86698	-9.08511	-9.34246	-10281	-10813.9	-11321.6
221.2	-9.2955	-8.11513	-8.66748	-10795.4	-9942.37	-10777	-7.82175	-7.36678	-8.19133	-9147.35	-8645.5	-12862.7	-10.0679	-8.03921	-8.71476	-10329.5	-10108.6	-9166.12	-8.99919	-9.02841	-8.83537	-10415.1	-10271.2	-11322.5	-9.87144	-9.09364	-9.36104	-10285.7	-10824	-11344.2
221.1	-9.31464	-8.11791	-8.64644	-10817.6	-9945.78	-10750.8	-7.86557	-7.39693	-8.18004	-9198.59	-8680.88	-12845	-10.0753	-8.06147	-8.76178	-10337.1	-10136.5	-9215.57	-9.00908	-9.03542	-8.83211	-10426.5	-10279.2	-11318.3	-9.87914	-9.09695	-9.38027	-10293.7	-10828	-11367.5
221	-9.32956	-8.12152	-8.62943	-10834.9	-9950.2	-10729.7	-7.90212	-7.42346	-8.16989	-9241.34	-8712.02	-12829	-10.0751	-8.08427	-8.80444	-10336.9	-10165.2	-9260.44	-9.02255	-9.04269	-8.82645	-10442.1	-10287.4	-11311	-9.89535	-9.09853	-9.39561	-10310.6	-10829.8	-11386
220.9	-9.34302	-8.12861	-8.61467	-10850.6	-9958.89	-10711.3	-7.93158	-7.44574	-8.16644	-9275.79	-8738.16	-12823.6	-10.0616	-8.11278	-8.84503	-10323	-10201.1	-9303.14	-9.04278	-9.04138	-8.83697	-10465.5	-10286	-11324.5	-9.90734	-9.09202	-9.4043	-10323.1	-10822.1	-11396.6
220.8	-9.35585	-8.14056	-8.60346	-10865.5	-9973.53	-10697.4	-7.95646	-7.46743	-8.16668	-9304.89	-8763.62	-12824	-10.0638	-8.12772	-8.88442	-10325.3	-10219.8	-9344.57	-9.05986	-9.04607	-8.8522	-10485.3	-10291.3	-11344	-9.92884	-9.07204	-9.40861	-10345.5	-10798.3	-11401.8
220.7	-9.37021	-8.16831	-8.58886	-10882.1	-10007.5	-10679.2	-7.98312	-7.47485	-8.16286	-9336.06	-8772.33	-12818	-10.0486	-8.1436	-8.92093	-10309.7	-10239.8	-9382.97	-9.07127	-9.06016	-8.8586	-10498.5	-10307.3	-11352.2	-9.94661	-9.06283	-9.41479	-10364	-10787.3	-11409.3
220.6	-9.38347	-8.1912	-8.57241	-10897.5	-10035.6	-10658.8	-8.01134	-7.47849	-8.16321	-9369.07	-8776.6	-12818.5	-10.035	-8.16738	-8.96314	-10295.7	-10269.7	-9427.36	-9.08607	-9.07353	-8.85679	-10515.6	-10322.5	-11349.9	-9.97069	-9.04909	-9.42144	-10389.1	-10771	-11417.4
220.5	-9.39872	-8.20809	-8.55549	-10915.2	-10056.3	-10637.7	-8.04273	-7.50363	-8.17502	-9405.78	-8806.1	-12837.1	-10.0182	-8.17747	-9.00114	-10278.5	-10282.4	-9467.33	-9.10034	-9.0898	-8.85312	-10532.1	-10341	-11345.2	-9.9895	-9.03503	-9.42577	-10408.7	-10754.3	-11422.6
220.4	-9.41693	-8.21601	-8.54538	-10936.4	-10066	-10625.2	-8.06663	-7.52847	-8.1911	-9433.73	-8835.25	-12862.3	-10.0006	-8.18729	-9.04248	-10260.4	-10294.7	-9510.81	-9.10839	-9.10884	-8.85576	-10541.5	-10362.7	-11348.6	-10.0126	-9.02581	-9.42963	-10432.8	-10743.3	-11427.3
220.3	-9.43095	-8.21582	-8.53585	-10952.7	-10065.7	-10613.3	-8.09107	-7.55397	-8.20605	-9462.31	-8865.18	-12885.8	-9.9942	-8.19217	-9.08284	-10253.9	-10300.9	-9553.26	-9.12314	-9.13606	-8.85472	-10558.5	-10393.7	-11347.3	-10.0428	-9.01356	-9.4352	-10464.2	-10728.7	-11434
220.2	-9.43919	-8.20877	-8.52255	-10962.2	-10057.1	-10596.8	-8.11578	-7.58565	-8.21723	-9491.21	-8902.36	-12903.4	-9.99618	-8.20158	-9.12292	-10255.9	-10312.7	-9595.42	-9.13144	-9.1623	-8.86184	-10568.1	-10423.5	-11356.4	-10.0742	-8.99866	-9.44182	-10496.9	-10711	-11442
220.1	-9.44043	-8.20119	-8.514	-10963.7	-10047.8	-10586.2	-8.14213	-7.61039	-8.23112	-9522.02	-8931.39	-12925.2	-10.0024	-8.21262	-9.14852	-10262.3	-10326.6	-9622.34	-9.14787	-9.18127	-8.86675	-10587.2	-10445.1	-11362.7	-10.11	-8.97803	-9.44705	-10534.2	-10686.4	-11448.4
220	-9.43598	-8.19558	-8.50591	-10958.5	-10040.9	-10576.1	-8.1592	-7.63779	-8.24536	-9541.98	-8963.55	-12947.5	-10.0258	-8.21723	-9.17625	-10286.3	-10332.4	-9651.51	-9.16309	-9.21316	-8.87206	-10604.8	-10481.4	-11369.5	-10.1463	-8.96311	-9.44636	-10572.1	-10668.7	-11447.6
219.9	-9.42877	-8.20435	-8.4967	-10950.1	-10051.7	-10564.7	-8.16587	-7.65152	-8.26576	-9549.79	-8979.66	-12979.6	-10.0378	-8.21881	-9.19834	-10298.6	-10334.4	-9674.74	-9.16875	-9.25157	-8.87106	-10611.3	-10525.1	-11368.2	-10.1782	-8.95124	-9.44866	-10605.3	-10654.5	-11450.3
219.8	-9.41961	-8.21743	-8.49515	-10939.5	-10067.7	-10562.7	-8.16557	-7.66506	-8.29223	-9549.43	-8995.55	-13021.1	-10.0507	-8.21773	-9.22306	-10311.8	-10333	-9700.74	-9.16713	-9.28503	-8.86528	-10609.4	-10563.1	-11360.8	-10.208	-8.94812	-9.44606	-10636.4	-10650.8	-11447.2
219.7	-9.4055	-8.22391	-8.49585	-10923.1	-10075.6	-10563.6	-8.16726	-7.687	-8.32458	-9551.41	-9021.3	-13071.9	-10.0581	-8.21894	-9.23736	-10319.4	-10334.5	-9715.79	-9.15921	-9.31606	-8.85681	-10600.3	-10598.4	-11350	-10.2419	-8.94707	-9.4376	-10671.7	-10649.6	-11436.9
219.6	-9.3878	-8.23795	-8.49376	-10902.6	-10092.8	-10561	-8.17005	-7.7124	-8.35337	-9554.67	-9051.11	-13117.1	-10.074	-8.222	-9.2472	-10335.7	-10338.4	-9726.14	-9.14862	-9.34715	-8.86634	-10588	-10633.8	-11362.2	-10.2738	-8.95002	-9.43374	-10704.9	-10653.1	-11432.3
219.5	-9.37329	-8.24714	-8.50203	-10885.7	-10104.1	-10571.3	-8.17081	-7.74402	-8.37628	-9555.56	-9088.22	-13153.1	-10.0899	-8.2203	-9.25839	-10352.1	-10336.3	-9737.9	-9.13305	-9.38929	-8.87823	-10570	-10681.8	-11377.4	-10.2937	-8.93749	-9.42372	-10725.7	-10638.2	-11420.1
219.4	-9.35499	-8.26289	-8.51009	-10864.5	-10123.4	-10581.3	-8.17559	-7.76861	-8.40618	-9561.15	-9117.08	-13200.1	-10.1126	-8.22593	-9.27356	-10375.3	-10343.3	-9753.86	-9.12289	-9.43069	-8.88747	-10558.2	-10728.9	-11389.2	-10.3113	-8.92298	-9.41609	-10744	-10620.9	-11410.9
219.3	-9.33452	-8.26654	-8.51691	-10840.7	-10127.9	-10589.8	-8.17308	-7.79862	-8.4324	-9558.22	-9152.3	-13241.2	-10.1398	-8.24169	-9.28196	-10403.2	-10363.2	-9762.7	-9.10079	-9.46447	-8.9068	-10532.7	-10767.3	-11414	-10.3351	-8.91154	-9.41395	-10768.8	-10607.3	-11408.3
219.2	-9.31282	-8.26252	-8.52905	-10815.5	-10122.9	-10604.9	-8.17229	-7.82529	-8.45401	-9557.29	-9183.6	-13275.2	-10.1749	-8.24803	-9.28773	-10439.3	-10371.1	-9768.76	-9.07936	-9.50416	-8.92542	-10507.9	-10812.4	-11437.9	-10.3675	-8.9025	-9.40583	-10802.5	-10596.5	-11398.4
219.1	-9.28298	-8.25303	-8.53611	-10780.8	-10111.3	-10613.7	-8.17235	-7.8448	-8.47538	-9557.36	-9206.49	-13308.7	-10.2099	-8.25919	-9.29352	-10475.2	-10385.2	-9774.85	-9.06796	-9.54194	-8.93642	-10494.7	-10855.4	-11452	-10.3908	-8.90639	-9.40473	-10826.8	-10601.1	-11397.1
219	-9.24629	-8.23885	-8.53971	-10738.2	-10093.9	-10618.1	-8.16215	-7.86758	-8.50195	-9545.43	-9233.23	-13350.5	-10.2547	-8.2766	-9.30505	-10521.1	-10407	-9786.98	-9.05151	-9.56442	-8.94468	-10475.6	-10881	-11462.6	-10.4125	-8.91306	-9.38805	-10849.4	-10609.1	-11376.9
218.9	-9.19812	-8.22912	-8.54871	-10682.3	-10082	-10629.3	-8.1527	-7.89266	-8.52283	-9534.38	-9262.66	-13383.2	-10.3017	-8.29387	-9.31405	-10569.4	-10428.8	-9796.45	-9.03861	-9.58764	-8.96227	-10460.7	-10907.4	-11485.1	-10.4311	-8.92991	-9.36754	-10868.8	-10629.1	-11352
218.8	-9.15405	-8.23293	-8.54734	-10631.1	-10086.7	-10627.6	-8.15071	-7.91856	-8.5424	-9532.06	-9293.06	-13414	-10.3524	-8.30407	-9.31646	-10621.4	-10441.6	-9798.98	-9.03096	-9.61871	-8.97674	-10451.9	-10942.8	-11503.6	-10.4584	-8.93754	-9.34146	-10897.3	-10638.2	-11320.4
218.7	-9.12452	-8.24422	-8.54671	-10596.8	-10100.5	-10626.8	-8.15037	-7.94557	-8.55941	-9531.66	-9324.75	-13440.7	-10.4018	-8.31146	-9.32122	-10672.1	-10450.9	-9803.99	-9.03116	-9.64358	-8.98685	-10452.1	-10971	-11516.6	-10.4701	-8.93547	-9.31665	-10909.5	-10635.8	-11290.4
218.6	-9.09343	-8.25877	-8.55229	-10560.7	-10118.4	-10633.8	-8.13945	-7.95774	-8.57211	-9518.89	-9339.04	-13460.6	-10.4356	-8.32325	-9.31251	-10706.7	-10465.7	-9794.83	-9.03084	-9.67158	-8.99658	-10451.7	-11002.9	-11529.1	-10.4798	-8.94189	-9.28781	-10919.6	-10643.4	-11255.4
218.5	-9.0705	-8.27149	-8.55264	-10534.1	-10133.9	-10634.2	-8.12134	-7.97269	-8.58281	-9497.71	-9356.58	-13477.4	-10.4737	-8.33441	-9.31159	-10745.8	-10479.7	-9793.86	-9.03155	-9.70223	-9.01098	-10452.5	-11037.8	-11547.5	-10.4937	-8.94609	-9.25792	-10934	-10648.4	-11219.2
218.4	-9.05359	-8.27863	-8.55266	-10514.4	-10142.7	-10634.2	-8.10391	-7.99026	-8.58729	-9477.32	-9377.2	-13484.5	-10.5165	-8.33605	-9.31225	-10789.7	-10481.8	-9794.55	-9.0305	-9.73783	-9.02629	-10451.3	-11078.3	-11567.1	-10.5097	-8.95126	-9.23026	-10950.7	-10654.5	-11185.7
218.3	-9.03476	-8.2757	-8.55739	-10492.6	-10139.1	-10640.1	-8.09624	-8.00599	-8.59234	-9468.35	-9395.66	-13492.4	-10.5402	-8.34084	-9.3145	-10814.1	-10487.8	-9796.92	-9.0279	-9.77004	-9.04156	-10448.3	-11114.9	-11586.7	-10.5198	-8.9753	-9.20216	-10961.2	-10683.2	-11151.6
218.2	-9.02022	-8.26469	-8.56361	-10475.7	-10125.6	-10647.8	-8.09191	-8.02581	-8.5979	-9463.29	-9418.92	-13501.1	-10.5795	-8.35124	-9.31531	-10854.4	-10500.9	-9797.77	-9.03037	-9.79342	-9.06348	-10451.2	-11141.5	-11614.8	-10.5264	-8.98869	-9.17266	-10968.1	-10699.1	-11115.9
218.1	-9.01392	-8.2693	-8.56563	-10468.4	-10131.3	-10650.4	-8.08684	-8.04282	-8.59473	-9457.36	-9438.88	-13496.1	-10.6198	-8.35297	-9.31156	-10895.7	-10503.1	-9793.83	-9.04184	-9.81788	-9.09422	-10464.4	-11169.3	-11654.2	-10.5268	-9.00297	-9.14734	-10968.5	-10716.1	-11085.2
218	-9.00499	-8.27021	-8.57013	-10458	-10132.4	-10656	-8.08032	-8.05164	-8.59673	-9449.74	-9449.24	-13499.3	-10.6573	-8.36561	-9.30979	-10934.2	-10519	-9791.97	-9.05613	-9.84241	-9.12334	-10481	-11197.2	-11691.5	-10.5152	-9.01076	-9.12283	-10956.4	-10725.4	-11055.5
217.9	-8.99775	-8.2721	-8.5658	-10449.6	-10134.7	-10650.6	-8.07818	-8.06435	-8.60293	-9447.23	-9464.15	-13509	-10.692	-8.36694	-9.31262	-10969.8	-10520.6	-9794.94	-9.0776	-9.85336	-9.14541	-10505.8	-11209.7	-11719.8	-10.5027	-9.01808	-9.09195	-10943.4	-10734.1	-11018.1
217.8	-8.99895	-8.28201	-8.55421	-10451	-10146.8	-10636.2	-8.08078	-8.07277	-8.60235	-9450.27	-9474.03	-13508.1	-10.7201	-8.37443	-9.31389	-10998.6	-10530.1	-9796.28	-9.09796	-9.86243	-9.16682	-10529.4	-11220	-11747.2	-10.5004	-9.0257	-9.06557	-10941	-10743.2	-10986.1
217.7	-8.99995	-8.28665	-8.54424	-10452.1	-10152.5	-10623.8	-8.07468	-8.07187	-8.59625	-9443.14	-9472.98	-13498.5	-10.7419	-8.37431	-9.30216	-11021	-10529.9	-9783.94	-9.11998	-9.87338	-9.1857	-10554.9	-11232.5	-11771.4	-10.4982	-9.03904	-9.04284	-10938.7	-10759	-10958.5
217.6	-9.01048	-8.29852	-8.52754	-10464.4	-10167.1	-10603	-8.07421	-8.06999	-8.58498	-9442.59	-9470.77	-13480.8	-10.7648	-8.36031	-9.29695	-11044.5	-10512.3	-9778.46	-9.14728	-9.89296	-9.19824	-10586.5	-11254.8	-11787.5	-10.4975	-9.047	-9.01211	-10938	-10768.5	-10921.3
217.5	-9.03087	-8.3054	-8.51044	-10488	-10175.5	-10581.7	-8.0735	-8.06956	-8.58197	-9441.76	-9470.27	-13476.1	-10.776	-8.35153	-9.28706	-11056	-10501.3	-9768.06	-9.1701	-9.90191	-9.21202	-10612.9	-11264.9	-11805.2	-10.4907	-9.06014	-8.98878	-10930.9	-10784.1	-10893
217.4	-9.05466	-8.30855	-8.50144	-10515.7	-10179.3	-10570.5	-8.06959	-8.07043	-8.58157	-9437.19	-9471.29	-13475.5	-10.7863	-8.34204	-9.27969	-11066.5	-10489.3	-9760.31	-9.19752	-9.90427	-9.2189	-10644.6	-11267.6	-11814	-10.4821	-9.07295	-8.95978	-10922	-10799.4	-10857.9
217.3	-9.08806	-8.31655	-8.49742	-10554.5	-10189.1	-10565.5	-8.07734	-8.07448	-8.57999	-9446.25	-9476.04	-13473	-10.7891	-8.33265	-9.26614	-11069.4	-10477.5	-9746.06	-9.22472	-9.90521	-9.23145	-10676.1	-11268.7	-11830.1	-10.4823	-9.08681	-8.93851	-10922.2	-10815.9	-10832.1
217.2	-9.13028	-8.32553	-8.49051	-10603.5	-10200.1	-10557	-8.0758	-8.07593	-8.57508	-9444.45	-9477.74	-13465.3	-10.7845	-8.33473	-9.25309	-11064.7	-10480.1	-9732.33	-9.25533	-9.89904	-9.24889	-10711.5	-11261.7	-11852.4	-10.4796	-9.09702	-8.92515	-10919.4	-10828	-10815.9
217.1	-9.16679	-8.33106	-8.49398	-10645.9	-10206.9	-10561.3	-8.07454	-8.07703	-8.57484	-9442.98	-9479.03	-13464.9	-10.7789	-8.34156	-9.24533	-11059	-10488.7	-9724.17	-9.28019	-9.88086	-9.26182	-10740.3	-11241	-11869	-10.4697	-9.10826	-8.90925	-10909	-10841.4	-10796.7
217	-9.19793	-8.33193	-8.50305	-10682.1	-10208	-10572.5	-8.06414	-8.07659	-8.58204	-9430.81	-9478.52	-13476.2	-10.7749	-8.35493	-9.23233	-11054.8	-10505.5	-9710.5	-9.30325	-9.85631	-9.2755	-10767	-11213.1	-11886.5	-10.4705	-9.12506	-8.90547	-10909.9	-10861.4	-10792.1
216.9	-9.22328	-8.31809	-8.50959	-10711.5	-10191	-10580.7	-8.05595	-8.07288	-8.58705	-9421.24	-9474.16	-13484.1	-10.7743	-8.36548	-9.21237	-11054.2	-10518.8	-9689.5	-9.32429	-9.84218	-9.29758	-10791.3	-11197	-11914.8	-10.4707	-9.13217	-8.89449	-10910.1	-10869.9	-10778.8
216.8	-9.24562	-8.3193	-8.52097	-10737.4	-10192.5	-10594.8	-8.05099	-8.06595	-8.59886	-9415.44	-9466.03	-13502.6	-10.772	-8.36402	-9.1887	-11051.9	-10517	-9664.61	-9.35505	-9.83408	-9.3193	-10826.9	-11187.8	-11942.6	-10.4605	-9.13999	-8.88475	-10899.4	-10879.2	-10767
216.7	-9.26687	-8.32838	-8.5379	-10762.1	-10203.6	-10615.9	-8.04583	-8.0588	-8.61272	-9409.4	-9457.64	-13524.4	-10.7697	-8.37116	-9.16249	-11049.5	-10525.9	-9637.04	-9.38214	-9.82453	-9.32753	-10858.3	-11176.9	-11953.2	-10.4411	-9.15104	-8.88466	-10879.2	-10892.3	-10766.9
216.6	-9.28931	-8.3371	-8.55969	-10788.2	-10214.3	-10643	-8.038	-8.05	-8.62879	-9400.24	-9447.31	-13549.6	-10.7632	-8.39276	-9.13123	-11042.8	-10553.1	-9604.16	-9.40553	-9.81171	-9.33385	-10885.4	-11162.3	-11961.3	-10.4329	-9.16107	-8.87831	-10870.7	-10904.3	-10759.2
216.5	-9.31769	-8.35078	-8.58043	-10821.1	-10231.1	-10668.8	-8.03001	-8.03991	-8.6371	-9390.9	-9435.47	-13562.7	-10.7538	-8.41	-9.08481	-11033.2	-10574.8	-9555.33	-9.42999	-9.79885	-9.34214	-10913.7	-11147.7	-11971.9	-10.425	-9.16127	-8.88742	-10862.5	-10904.5	-10770.2
216.4	-9.34471	-8.35049	-8.5942	-10852.5	-10230.7	-10685.9	-8.02108	-8.03937	-8.65732	-9380.46	-9434.84	-13594.4	-10.7443	-8.4297	-9.04393	-11023.5	-10599.6	-9512.34	-9.44372	-9.78062	-9.34207	-10929.6	-11127	-11971.8	-10.4157	-9.15954	-8.88705	-10852.8	-10902.5	-10769.8
216.3	-9.37021	-8.33682	-8.61571	-10882.1	-10214	-10712.6	-8.00076	-8.0295	-8.67356	-9356.69	-9423.25	-13619.9	-10.7319	-8.45447	-9.00515	-11010.7	-10630.7	-9471.55	-9.453	-9.7511	-9.34381	-10940.3	-11093.4	-11974	-10.4069	-9.16276	-8.893	-10843.6	-10906.3	-10777
216.2	-9.38301	-8.32014	-8.63503	-10897	-10193.5	-10736.6	-7.98095	-8.00861	-8.68635	-9333.53	-9398.74	-13640	-10.7183	-8.48272	-8.95528	-10996.8	-10666.2	-9419.1	-9.46549	-9.73041	-9.34516	-10954.7	-11069.8	-11975.8	-10.4103	-9.16513	-8.89386	-10847.1	-10909.1	-10778
216.1	-9.38932	-8.30981	-8.65325	-10904.3	-10180.9	-10759.3	-7.96467	-7.99504	-8.70326	-9314.49	-9382.81	-13666.6	-10.7212	-8.51058	-8.91558	-10999.8	-10701.3	-9377.34	-9.47979	-9.71111	-9.34987	-10971.3	-11047.9	-11981.8	-10.3982	-9.17644	-8.90334	-10834.5	-10922.6	-10789.5
216	-9.39555	-8.30184	-8.67951	-10911.6	-10171.1	-10792	-7.95205	-7.98197	-8.7162	-9299.73	-9367.47	-13686.9	-10.7212	-8.54556	-8.87449	-10999.8	-10745.2	-9334.12	-9.50174	-9.68826	-9.34919	-10996.7	-11021.9	-11980.9	-10.3828	-9.18559	-8.9161	-10818.5	-10933.5	-10805
215.9	-9.3946	-8.29704	-8.69925	-10910.5	-10165.2	-10816.5	-7.94092	-7.97363	-8.73333	-9286.71	-9357.68	-13713.8	-10.7253	-8.58704	-8.83712	-11004	-10797.4	-9294.82	-9.51808	-9.66293	-9.34007	-11015.6	-10993.1	-11969.2	-10.3571	-9.20173	-8.92763	-10791.7	-10952.7	-10818.9
215.8	-9.39649	-8.29163	-8.71652	-10912.7	-10158.6	-10838	-7.9212	-7.96037	-8.74293	-9263.65	-9342.12	-13728.9	-10.7317	-8.63433	-8.79693	-11010.5	-10856.9	-9252.54	-9.53624	-9.63794	-9.32868	-11036.6	-10964.6	-11954.6	-10.3272	-9.19633	-8.9346	-10760.6	-10946.3	-10827.4
215.7	-9.39609	-8.28855	-8.73499	-10912.2	-10154.8	-10860.9	-7.90893	-7.94836	-8.74977	-9249.3	-9328.03	-13739.6	-10.7349	-8.67693	-8.76269	-11013.8	-10910.4	-9216.53	-9.55381	-9.62343	-9.31853	-11057	-10948.1	-11941.6	-10.306	-9.19126	-8.94563	-10738.5	-10940.2	-10840.7
215.6	-9.38188	-8.26872	-8.75175	-10895.7	-10130.5	-10881.8	-7.88632	-7.94127	-8.76119	-9222.86	-9319.71	-13757.5	-10.7295	-8.72068	-8.73183	-11008.3	-10965.4	-9184.07	-9.55915	-9.61113	-9.30372	-11063.1	-10934.1	-11922.7	-10.2829	-9.18562	-8.95576	-10714.4	-10933.5	-10853
215.5	-9.36621	-8.25894	-8.7706	-10877.5	-10118.6	-10905.2	-7.86062	-7.92866	-8.76314	-9192.8	-9304.91	-13760.6	-10.7261	-8.7666	-8.69989	-11004.8	-11023.2	-9150.48	-9.56409	-9.60874	-9.29526	-11068.9	-10931.4	-11911.8	-10.2615	-9.18818	-8.96166	-10692.1	-10936.6	-10860.2
215.4	-9.35689	-8.25749	-8.79434	-10866.7	-10116.8	-10934.7	-7.83515	-7.90119	-8.75202	-9163.02	-9272.67	-13743.1	-10.7131	-8.80856	-8.66531	-10991.4	-11075.9	-9114.11	-9.57375	-9.61611	-9.28018	-11080	-10939.8	-11892.5	-10.2416	-9.17817	-8.97002	-10671.4	-10924.6	-10870.3
215.3	-9.34527	-8.25273	-8.8154	-10853.2	-10111	-10960.9	-7.81415	-7.86797	-8.73517	-9138.46	-9233.68	-13716.7	-10.6984	-8.84688	-8.63456	-10976.4	-11124.1	-9081.77	-9.58424	-9.61163	-9.26772	-11092.2	-10934.7	-11876.5	-10.2127	-9.1714	-8.9707	-10641.3	-10916.6	-10871.1
215.2	-9.34329	-8.24914	-8.8343	-10850.9	-10106.6	-10984.4	-7.79537	-7.84834	-8.72456	-9116.49	-9210.65	-13700	-10.6786	-8.88889	-8.61115	-10956	-11176.9	-9057.14	-9.5948	-9.60184	-9.2442	-11104.4	-10923.6	-11846.4	-10.1924	-9.1606	-8.96781	-10620.1	-10903.7	-10867.6
215.1	-9.3365	-8.2423	-8.85337	-10843	-10098.2	-11008.1	-7.76725	-7.82741	-8.72131	-9083.61	-9186.08	-13694.9	-10.6483	-8.93346	-8.58701	-10925	-11233	-9031.75	-9.59967	-9.59223	-9.2249	-11110	-10912.6	-11821.7	-10.1704	-9.14567	-8.97318	-10597.2	-10886	-10874.1
215	-9.32262	-8.23169	-8.86941	-10826.9	-10085.2	-11028.1	-7.73807	-7.80595	-8.71416	-9049.48	-9160.9	-13683.7	-10.6136	-8.96728	-8.57146	-10889.4	-11275.5	-9015.4	-9.60859	-9.57884	-9.21096	-11120.4	-10897.4	-11803.8	-10.1516	-9.12338	-8.973	-10577.6	-10859.4	-10873.9
214.9	-9.31518	-8.2114	-8.88016	-10818.2	-10060.3	-11041.4	-7.71539	-7.79154	-8.69994	-9022.96	-9143.99	-13661.4	-10.5816	-8.99694	-8.5581	-10856.5	-11312.8	-9001.34	-9.61557	-9.56968	-9.19577	-11128.4	-10887	-11784.3	-10.1314	-9.09952	-8.97622	-10556.5	-10831	-10877.8
214.8	-9.29446	-8.18134	-8.88532	-10794.2	-10023.5	-11047.9	-7.69641	-7.7806	-8.68555	-9000.76	-9131.15	-13638.8	-10.5529	-9.01787	-8.55122	-10827.1	-11339.1	-8994.11	-9.63015	-9.5639	-9.18091	-11145.3	-10880.4	-11765.3	-10.1084	-9.07325	-8.97022	-10532.6	-10799.8	-10870.5
214.7	-9.27357	-8.14965	-8.88754	-10769.9	-9984.66	-11050.6	-7.67904	-7.75712	-8.66685	-8980.45	-9103.59	-13609.4	-10.5269	-9.02612	-8.54407	-10800.4	-11349.5	-8986.59	-9.64733	-9.56742	-9.16437	-11165.2	-10884.4	-11744.1	-10.0986	-9.03753	-8.96331	-10522.4	-10757.2	-10862.2
214.6	-9.25733	-8.11736	-8.88608	-10751	-9945.1	-11048.8	-7.66631	-7.72714	-8.64038	-8965.56	-9068.41	-13567.8	-10.4976	-9.03253	-8.5464	-10770.3	-11357.6	-8989.04	-9.66906	-9.58047	-9.1418	-11190.3	-10899.3	-11715.2	-10.0933	-8.99758	-8.95451	-10516.8	-10709.7	-10851.5
214.5	-9.23748	-8.08353	-8.87561	-10728	-9903.66	-11035.8	-7.66543	-7.69348	-8.60894	-8964.53	-9028.91	-13518.5	-10.4671	-9.039	-8.54659	-10739.1	-11365.7	-8989.24	-9.68808	-9.59138	-9.12113	-11212.4	-10911.7	-11688.7	-10.0894	-8.96329	-8.94432	-10512.8	-10668.9	-10839.2
214.4	-9.22536	-8.06104	-8.87589	-10713.9	-9876.1	-11036.1	-7.66768	-7.6617	-8.58001	-8967.16	-8991.61	-13473	-10.429	-9.04495	-8.54883	-10700	-11373.2	-8991.59	-9.70374	-9.59212	-9.09763	-11230.5	-10912.5	-11658.6	-10.0899	-8.93026	-8.9388	-10513.3	-10629.6	-10832.5
214.3	-9.213	-8.03093	-8.87284	-10699.6	-9839.21	-11032.3	-7.67166	-7.63405	-8.54852	-8971.82	-8959.16	-13423.6	-10.3825	-9.05427	-8.5528	-10652.3	-11384.9	-8995.77	-9.71413	-9.59189	-9.06614	-11242.5	-10912.2	-11618.2	-10.0888	-8.89278	-8.92568	-10512.2	-10584.9	-10816.6
214.2	-9.20239	-8.00618	-8.86591	-10687.2	-9808.89	-11023.7	-7.68022	-7.60866	-8.51078	-8981.83	-8929.36	-13364.3	-10.3339	-9.05784	-8.56026	-10602.4	-11389.4	-9003.62	-9.72671	-9.58586	-9.0431	-11257.1	-10905.4	-11588.7	-10.097	-8.84914	-8.9006	-10520.7	-10533	-10786.2
214.1	-9.19614	-7.98835	-8.86063	-10680	-9787.05	-11017.2	-7.68783	-7.5904	-8.46657	-8990.73	-8907.93	-13294.9	-10.2849	-9.05509	-8.56487	-10552.1	-11385.9	-9008.47	-9.73413	-9.58457	-9.02483	-11265.7	-10903.9	-11565.3	-10.1047	-8.80339	-8.88593	-10528.7	-10478.5	-10768.4
214	-9.18524	-7.96508	-8.85664	-10667.3	-9758.54	-11012.2	-7.69955	-7.57003	-8.42854	-9004.44	-8884.03	-13235.2	-10.2301	-9.05507	-8.5726	-10495.9	-11385.9	-9016.6	-9.74387	-9.5841	-9.00619	-11276.9	-10903.4	-11541.4	-10.1033	-8.75943	-8.85445	-10527.3	-10426.2	-10730.2
213.9	-9.17913	-7.94128	-8.84949	-10660.2	-9729.38	-11003.3	-7.71068	-7.55223	-8.38885	-9017.45	-8863.14	-13172.9	-10.1831	-9.04303	-8.57532	-10447.7	-11370.8	-9019.46	-9.76358	-9.58607	-8.98309	-11299.7	-10905.6	-11511.8	-10.1055	-8.70864	-8.836	-10529.6	-10365.8	-10707.9
213.8	-9.17253	-7.92058	-8.84471	-10652.6	-9704.02	-10997.4	-7.72702	-7.54141	-8.35014	-9036.56	-8850.44	-13112.1	-10.1393	-9.02552	-8.58286	-10402.7	-11348.7	-9027.39	-9.78588	-9.59335	-8.96522	-11325.5	-10913.9	-11488.9	-10.1058	-8.66479	-8.81982	-10529.9	-10313.6	-10688.3
213.7	-9.16907	-7.89266	-8.8333	-10648.5	-9669.81	-10983.2	-7.73656	-7.53843	-8.31594	-9047.72	-8846.94	-13058.4	-10.101	-9.00969	-8.59512	-10363.4	-11328.8	-9040.28	-9.80732	-9.60825	-8.95887	-11350.4	-10930.9	-11480.7	-10.1018	-8.62524	-8.81033	-10525.7	-10266.5	-10676.8
213.6	-9.163	-7.86513	-8.82104	-10641.5	-9636.08	-10967.9	-7.74906	-7.53586	-8.29339	-9062.34	-8843.93	-13023	-10.0623	-8.99237	-8.6067	-10323.7	-11307.1	-9052.46	-9.82531	-9.61945	-8.93852	-11371.2	-10943.6	-11454.7	-10.113	-8.57557	-8.79868	-10537.4	-10207.4	-10662.7
213.5	-9.15424	-7.83197	-8.80667	-10631.3	-9595.45	-10950.1	-7.7686	-7.53346	-8.25859	-9085.19	-8841.11	-12968.3	-10.0279	-8.96838	-8.62387	-10288.4	-11276.9	-9070.52	-9.83435	-9.62612	-8.92397	-11381.6	-10951.2	-11436	-10.1156	-8.53522	-8.78444	-10540.1	-10159.3	-10645.4
213.4	-9.1481	-7.80499	-8.7951	-10624.2	-9562.4	-10935.7	-7.7838	-7.52644	-8.2245	-9102.96	-8832.87	-12914.8	-10.0016	-8.93712	-8.64589	-10261.5	-11237.6	-9093.68	-9.84629	-9.63449	-8.90778	-11395.5	-10960.7	-11415.3	-10.1316	-8.49859	-8.77261	-10556.7	-10115.7	-10631.1
213.3	-9.13769	-7.78845	-8.77561	-10612.1	-9542.14	-10911.4	-7.80646	-7.5157	-8.1906	-9129.46	-8820.27	-12861.5	-9.98001	-8.90572	-8.66138	-10239.3	-11198.1	-9109.97	-9.85648	-9.64128	-8.89197	-11407.3	-10968.4	-11395	-10.1497	-8.46643	-8.75745	-10575.6	-10077.5	-10612.7
213.2	-9.12355	-7.78207	-8.75469	-10595.7	-9534.32	-10885.4	-7.81828	-7.49691	-8.16993	-9143.29	-8798.22	-12829.1	-9.96122	-8.8638	-8.67247	-10220	-11145.4	-9121.64	-9.87091	-9.63621	-8.8702	-11424	-10962.7	-11367.1	-10.1685	-8.43649	-8.7391	-10595.2	-10041.8	-10590.5
213.1	-9.11853	-7.77883	-8.73661	-10589.8	-9530.35	-10863	-7.8306	-7.47869	-8.14892	-9157.7	-8776.83	-12796.1	-9.95172	-8.82371	-8.67661	-10210.3	-11095	-9125.99	-9.88181	-9.63141	-8.85426	-11436.6	-10957.2	-11346.7	-10.1846	-8.41125	-8.72368	-10612	-10011.8	-10571.8
213	-9.11846	-7.77804	-8.71584	-10589.8	-9529.38	-10837.1	-7.84595	-7.47146	-8.1374	-9175.65	-8768.35	-12778	-9.94264	-8.77076	-8.68356	-10201	-11028.4	-9133.3	-9.89217	-9.62143	-8.83977	-11448.6	-10945.8	-11328.1	-10.2005	-8.38997	-8.71042	-10628.5	-9986.45	-10555.7
212.9	-9.1156	-7.76208	-8.68428	-10586.4	-9509.83	-10797.9	-7.84942	-7.47989	-8.12464	-9179.7	-8778.24	-12758	-9.94312	-8.72917	-8.69279	-10201.5	-10976.1	-9143.01	-9.89065	-9.614	-8.8293	-11446.8	-10937.4	-11314.7	-10.2089	-8.37386	-8.69297	-10637.3	-9967.28	-10534.6
212.8	-9.11817	-7.75083	-8.6588	-10589.4	-9496.04	-10766.2	-7.83936	-7.50024	-8.11915	-9167.94	-8802.12	-12749.4	-9.94137	-8.67366	-8.70541	-10199.7	-10906.3	-9156.28	-9.89077	-9.61239	-8.81497	-11446.9	-10935.6	-11296.3	-10.2149	-8.34966	-8.67989	-10643.5	-9938.47	-10518.7
212.7	-9.1159	-7.73383	-8.63355	-10586.8	-9475.22	-10734.8	-7.82534	-7.51528	-8.10541	-9151.54	-8819.77	-12727.8	-9.95107	-8.61516	-8.71966	-10209.6	-10832.8	-9171.27	-9.89526	-9.61263	-8.81108	-11452.1	-10935.8	-11291.3	-10.2231	-8.31358	-8.65766	-10652.1	-9895.53	-10491.8
212.6	-9.11376	-7.71775	-8.60476	-10584.3	-9455.52	-10699	-7.81156	-7.53282	-8.08755	-9135.43	-8840.36	-12699.7	-9.95779	-8.5609	-8.7405	-10216.5	-10764.5	-9193.19	-9.89515	-9.6057	-8.8172	-11452	-10928	-11299.2	-10.2288	-8.2926	-8.63426	-10658	-9870.55	-10463.4
212.5	-9.11148	-7.70529	-8.58048	-10581.7	-9440.25	-10668.8	-7.79475	-7.53885	-8.06573	-9115.77	-8847.44	-12665.5	-9.97318	-8.50149	-8.75617	-10232.3	-10689.8	-9209.67	-9.89517	-9.61228	-8.82208	-11452	-10935.4	-11305.4	-10.2399	-8.27837	-8.61549	-10669.6	-9853.62	-10440.7
212.4	-9.09956	-7.69963	-8.55709	-10567.8	-9433.32	-10639.7	-7.78377	-7.54449	-8.05342	-9102.93	-8854.05	-12646.1	-9.98832	-8.44385	-8.77154	-10247.8	-10617.3	-9225.84	-9.8831	-9.62115	-8.84203	-11438.1	-10945.5	-11331	-10.2591	-8.26935	-8.59648	-10689.6	-9842.88	-10417.6
212.3	-9.09021	-7.6913	-8.52958	-10557	-9423.11	-10605.5	-7.77174	-7.53962	-8.03628	-9088.86	-8848.34	-12619.2	-10.0084	-8.39365	-8.78152	-10268.4	-10554.2	-9236.34	-9.86692	-9.63063	-8.86444	-11419.3	-10956.3	-11359.7	-10.2829	-8.26463	-8.57693	-10714.4	-9837.26	-10393.9
212.2	-9.07964	-7.69096	-8.49643	-10544.7	-9422.69	-10564.3	-7.76357	-7.53846	-8.01996	-9079.31	-8846.98	-12593.6	-10.0357	-8.33742	-8.79254	-10296.4	-10483.5	-9247.93	-9.84516	-9.63144	-8.88327	-11394.2	-10957.2	-11383.9	-10.2985	-8.25848	-8.55482	-10730.7	-9829.94	-10367.1
212.1	-9.07071	-7.6909	-8.46088	-10534.3	-9422.62	-10520.1	-7.74936	-7.5457	-8.01213	-9062.69	-8855.47	-12581.3	-10.0597	-8.28209	-8.78472	-10321.1	-10413.9	-9239.7	-9.82845	-9.62942	-8.908	-11374.8	-10954.9	-11415.6	-10.3074	-8.25104	-8.53308	-10739.9	-9821.09	-10340.8
212	-9.07151	-7.69081	-8.42721	-10535.2	-9422.51	-10478.2	-7.72779	-7.55602	-8.00856	-9037.46	-8867.59	-12575.7	-10.084	-8.22629	-8.77841	-10346	-10343.8	-9233.07	-9.80842	-9.62547	-8.92346	-11351.6	-10950.4	-11435.4	-10.3134	-8.24229	-8.5055	-10746.2	-9810.67	-10307.4
211.9	-9.07204	-7.68384	-8.38678	-10535.9	-9413.97	-10428	-7.69816	-7.56992	-7.99375	-9002.81	-8883.9	-12552.4	-10.1182	-8.17568	-8.76845	-10381.1	-10280.1	-9222.59	-9.78651	-9.62018	-8.95089	-11326.3	-10944.4	-11470.5	-10.3221	-8.2443	-8.49137	-10755.2	-9813.06	-10290.2
211.8	-9.06887	-7.67356	-8.34011	-10532.2	-9401.38	-10370	-7.67387	-7.58166	-7.98261	-8974.4	-8897.68	-12534.9	-10.1542	-8.1241	-8.75658	-10418	-10215.3	-9210.1	-9.77073	-9.61729	-8.98062	-11308	-10941.1	-11508.6	-10.3236	-8.24384	-8.47859	-10756.8	-9812.52	-10274.8
211.7	-9.06798	-7.6465	-8.29274	-10531.1	-9368.22	-10311.1	-7.64578	-7.59338	-7.97906	-8941.55	-8911.43	-12529.4	-10.1853	-8.07246	-8.74317	-10449.9	-10150.4	-9196	-9.75666	-9.62008	-9.01634	-11291.7	-10944.3	-11554.4	-10.3225	-8.24544	-8.47156	-10755.7	-9814.42	-10266.2
211.6	-9.0659	-7.61813	-8.23958	-10528.7	-9333.46	-10245	-7.61685	-7.59761	-7.97568	-8907.72	-8916.4	-12524.1	-10.2112	-8.02636	-8.73634	-10476.5	-10092.4	-9188.82	-9.74356	-9.62066	-9.05672	-11276.6	-10945	-11606.1	-10.3068	-8.24006	-8.46379	-10739.3	-9808.02	-10256.8
211.5	-9.05679	-7.58522	-8.19007	-10518.1	-9293.14	-10183.4	-7.58594	-7.59734	-7.96282	-8871.57	-8916.08	-12503.9	-10.238	-7.98007	-8.73593	-10504	-10034.2	-9188.39	-9.72443	-9.62204	-9.09611	-11254.4	-10946.5	-11656.6	-10.293	-8.24084	-8.46797	-10724.9	-9808.95	-10261.9
211.4	-9.05031	-7.56409	-8.14533	-10510.6	-9267.26	-10127.8	-7.55031	-7.59394	-7.9468	-8829.9	-8912.09	-12478.7	-10.258	-7.95418	-8.73398	-10524.5	-10001.6	-9186.33	-9.70235	-9.62931	-9.14463	-11228.9	-10954.8	-11718.8	-10.2844	-8.24502	-8.46567	-10716	-9813.92	-10259.1
211.3	-9.04179	-7.55571	-8.10507	-10500.7	-9256.99	-10077.7	-7.52392	-7.5869	-7.94381	-8799.04	-8903.83	-12474	-10.2728	-7.93562	-8.7265	-10539.7	-9978.3	-9178.47	-9.68402	-9.63756	-9.19101	-11207.7	-10964.2	-11778.2	-10.2699	-8.23506	-8.45922	-10700.9	-9802.07	-10251.3
211.2	-9.02678	-7.54795	-8.08193	-10483.3	-9247.48	-10048.9	-7.50218	-7.57995	-7.93882	-8773.62	-8895.67	-12466.2	-10.2879	-7.91055	-8.7232	-10555.2	-9946.77	-9175	-9.67251	-9.63881	-9.22448	-11194.3	-10965.6	-11821.1	-10.2562	-8.23204	-8.45882	-10686.6	-9798.47	-10250.8
211.1	-9.01104	-7.53213	-8.04975	-10465	-9228.1	-10008.9	-7.4757	-7.56784	-7.92668	-8742.65	-8881.46	-12447.1	-10.2905	-7.88599	-8.71099	-10557.9	-9915.89	-9162.15	-9.65741	-9.64721	-9.26358	-11176.9	-10975.2	-11871.2	-10.2461	-8.22594	-8.45061	-10676.1	-9791.21	-10240.9
211	-8.99201	-7.52091	-8.01631	-10442.9	-9214.35	-9967.34	-7.43832	-7.55791	-7.93164	-8698.93	-8869.8	-12454.9	-10.2887	-7.86709	-8.68758	-10556	-9892.13	-9137.53	-9.6385	-9.6659	-9.30146	-11155	-10996.4	-11919.8	-10.232	-8.22533	-8.44605	-10661.4	-9790.48	-10235.3
210.9	-8.96815	-7.50238	-7.98437	-10415.2	-9191.65	-9927.63	-7.40237	-7.54559	-7.94129	-8656.89	-8855.35	-12470.1	-10.2851	-7.85154	-8.66672	-10552.3	-9872.57	-9115.59	-9.62381	-9.68459	-9.33639	-11138	-11017.7	-11964.5	-10.2102	-8.22071	-8.43616	-10638.6	-9784.99	-10223.3
210.8	-8.94538	-7.48075	-7.95199	-10388.8	-9165.15	-9887.37	-7.3636	-7.5302	-7.95535	-8611.55	-8837.28	-12492.1	-10.274	-7.83608	-8.65508	-10540.9	-9853.13	-9103.35	-9.60907	-9.70864	-9.36705	-11120.9	-11045.1	-12003.8	-10.1786	-8.21606	-8.43758	-10605.7	-9779.45	-10225.1
210.7	-8.92717	-7.44718	-7.91967	-10367.6	-9124.02	-9847.18	-7.32149	-7.50718	-7.95647	-8562.3	-8810.27	-12493.9	-10.2596	-7.83622	-8.64972	-10526.2	-9853.31	-9097.71	-9.60214	-9.72431	-9.39763	-11112.9	-11062.9	-12043	-10.1382	-8.2118	-8.43626	-10563.6	-9774.38	-10223.5
210.6	-8.9	-7.41559	-7.89574	-10336.1	-9085.32	-9817.43	-7.28893	-7.47619	-7.95882	-8524.23	-8773.9	-12497.6	-10.2408	-7.83682	-8.64991	-10506.9	-9854.06	-9097.91	-9.60655	-9.72906	-9.42353	-11118	-11068.3	-12076.2	-10.1007	-8.21303	-8.42798	-10524.6	-9775.84	-10213.4
210.5	-8.86991	-7.37962	-7.86974	-10301.1	-9041.25	-9785.1	-7.26252	-7.44052	-7.95438	-8493.34	-8732.04	-12490.6	-10.2083	-7.85331	-8.65292	-10473.5	-9874.8	-9101.08	-9.6123	-9.73861	-9.44243	-11124.7	-11079.2	-12100.4	-10.0682	-8.22146	-8.41467	-10490.7	-9785.88	-10197.3
210.4	-8.83023	-7.35222	-7.85141	-10255	-9007.68	-9762.31	-7.24912	-7.40522	-7.95749	-8477.67	-8690.61	-12495.5	-10.1671	-7.85205	-8.64583	-10431.3	-9873.21	-9093.62	-9.62263	-9.74366	-9.46988	-11136.6	-11084.9	-12135.6	-10.0397	-8.23425	-8.40216	-10461	-9801.1	-10182.1
210.3	-8.78451	-7.32949	-7.84583	-10201.9	-8979.83	-9755.37	-7.24315	-7.36341	-7.9615	-8470.69	-8641.54	-12501.8	-10.1273	-7.86319	-8.63957	-10390.4	-9887.22	-9087.03	-9.6289	-9.75337	-9.50381	-11143.9	-11096	-12179.1	-10.0184	-8.2459	-8.3918	-10438.8	-9814.97	-10169.6
210.2	-8.73883	-7.31331	-7.83936	-10148.9	-8960.01	-9747.33	-7.2332	-7.31577	-7.96104	-8459.05	-8585.63	-12501.1	-10.0728	-7.86853	-8.63045	-10334.5	-9893.94	-9077.44	-9.63197	-9.75859	-9.53427	-11147.4	-11101.9	-12218.1	-9.985	-8.26121	-8.38043	-10404	-9833.19	-10155.8
210.1	-8.70203	-7.30184	-7.84583	-10106.1	-8945.96	-9755.37	-7.21944	-7.2567	-7.95436	-8442.96	-8516.31	-12490.6	-10.0275	-7.86429	-8.61199	-10288	-9888.61	-9058.03	-9.63813	-9.76102	-9.56468	-11154.6	-11104.7	-12257.1	-9.95715	-8.27726	-8.37303	-10375	-9852.3	-10146.8
210	-8.6734	-7.27996	-7.85728	-10072.9	-8919.15	-9769.61	-7.20214	-7.22086	-7.95159	-8422.73	-8474.25	-12486.2	-9.98321	-7.8689	-8.59221	-10242.6	-9894.4	-9037.22	-9.64216	-9.76176	-9.58884	-11159.2	-11105.5	-12288	-9.92349	-8.2851	-8.35603	-10339.9	-9861.63	-10126.2
209.9	-8.64535	-7.26928	-7.86884	-10040.3	-8906.07	-9783.98	-7.18512	-7.18755	-7.94943	-8402.82	-8435.16	-12482.8	-9.93448	-7.87257	-8.58114	-10192.6	-9899.02	-9025.58	-9.65627	-9.75715	-9.5998	-11175.5	-11100.3	-12302.1	-9.88308	-8.29479	-8.3361	-10297.8	-9873.16	-10102.1
209.8	-8.62644	-7.26887	-7.87597	-10018.4	-8905.56	-9792.85	-7.15344	-7.14918	-7.95363	-8365.77	-8390.13	-12489.4	-9.87684	-7.86719	-8.56401	-10133.5	-9892.25	-9007.56	-9.67823	-9.74295	-9.59781	-11201	-11084.1	-12299.5	-9.83944	-8.29703	-8.32178	-10252.3	-9875.83	-10084.7
209.7	-8.60635	-7.26137	-7.89357	-9995.02	-8896.38	-9814.73	-7.11829	-7.112	-7.95724	-8324.67	-8346.49	-12495.1	-9.8144	-7.85123	-8.54222	-10069.4	-9872.18	-8984.64	-9.69348	-9.73662	-9.59074	-11218.6	-11076.9	-12290.5	-9.79326	-8.30541	-8.30809	-10204.2	-9885.8	-10068.1
209.6	-8.58369	-7.24976	-7.90382	-9968.7	-8882.15	-9827.47	-7.07669	-7.06072	-7.9606	-8276.02	-8286.31	-12500.4	-9.75576	-7.83657	-8.52407	-10009.2	-9853.75	-8965.55	-9.70168	-9.7274	-9.58736	-11228.1	-11066.4	-12286.1	-9.74991	-8.32181	-8.2938	-10159	-9905.32	-10050.8
209.5	-8.56011	-7.24416	-7.91309	-9941.32	-8875.29	-9839	-7.04854	-7.00301	-7.95826	-8243.1	-8218.59	-12496.7	-9.70544	-7.81505	-8.50657	-9957.6	-9826.69	-8947.15	-9.71694	-9.71666	-9.58952	-11245.8	-11054.2	-12288.9	-9.70551	-8.33637	-8.29036	-10112.8	-9922.65	-10046.7
209.4	-8.535	-7.25027	-7.9233	-9912.16	-8882.78	-9851.7	-7.01937	-6.93748	-7.96162	-8208.98	-8141.68	-12502	-9.64376	-7.78852	-8.49241	-9894.32	-9793.33	-8932.25	-9.73102	-9.70242	-9.57248	-11262.1	-11038	-12267.1	-9.65494	-8.33583	-8.27904	-10060.1	-9922.01	-10032.9
209.3	-8.52609	-7.25979	-7.93159	-9901.81	-8894.44	-9862	-6.98905	-6.8816	-7.95241	-8173.52	-8076.1	-12487.5	-9.57998	-7.77001	-8.46738	-9828.88	-9770.06	-8905.93	-9.74087	-9.67868	-9.55633	-11273.5	-11011	-12246.4	-9.62016	-8.3375	-8.26804	-10023.8	-9924	-10019.6
209.2	-8.51493	-7.27456	-7.94153	-9888.85	-8912.54	-9874.36	-6.96081	-6.83695	-7.94596	-8140.5	-8023.7	-12477.4	-9.52813	-7.74707	-8.43395	-9775.69	-9741.21	-8870.76	-9.74763	-9.64709	-9.5383	-11281.3	-10975	-12223.3	-9.58334	-8.34329	-8.25996	-9985.48	-9930.89	-10009.8
209.1	-8.51431	-7.2835	-7.96104	-9888.13	-8923.49	-9898.62	-6.92975	-6.8099	-7.94529	-8104.17	-7991.96	-12476.3	-9.4846	-7.71676	-8.39259	-9731.03	-9703.1	-8827.26	-9.75455	-9.62097	-9.51482	-11289.3	-10945.3	-12193.2	-9.55122	-8.35078	-8.24578	-9952.01	-9939.81	-9992.63
209	-8.52451	-7.29902	-7.98109	-9899.98	-8942.5	-9923.55	-6.90424	-6.78951	-7.95002	-8074.34	-7968.03	-12483.8	-9.44568	-7.68366	-8.3479	-9691.09	-9661.48	-8780.26	-9.75365	-9.59794	-9.49895	-11288.2	-10919.1	-12172.8	-9.5135	-8.34318	-8.24064	-9912.71	-9930.76	-9986.4
208.9	-8.53695	-7.31282	-8.00379	-9914.42	-8959.41	-9951.78	-6.88878	-6.76781	-7.95509	-8056.26	-7942.56	-12491.7	-9.4086	-7.64542	-8.30968	-9653.05	-9613.4	-8740.06	-9.74673	-9.56682	-9.4806	-11280.2	-10883.7	-12149.3	-9.4751	-8.33699	-8.24473	-9872.7	-9923.39	-9991.36
208.8	-8.55048	-7.31957	-8.01749	-9930.14	-8967.68	-9968.81	-6.85875	-6.74458	-7.93419	-8021.14	-7915.3	-12458.9	-9.37656	-7.59835	-8.27614	-9620.18	-9554.21	-8704.78	-9.74081	-9.53886	-9.45905	-11273.4	-10851.9	-12121.7	-9.4318	-8.33374	-8.25753	-9827.58	-9919.52	-10006.9
208.7	-8.56887	-7.32591	-8.01359	-9951.49	-8975.45	-9963.96	-6.83175	-6.71732	-7.91093	-7989.56	-7883.31	-12422.4	-9.33955	-7.56048	-8.23315	-9582.21	-9506.59	-8659.57	-9.73321	-9.51348	-9.43998	-11264.6	-10823	-12097.3	-9.38558	-8.33545	-8.26178	-9779.42	-9921.56	-10012
208.6	-8.58934	-7.32913	-8.00416	-9975.27	-8979.39	-9952.24	-6.80491	-6.70688	-7.90453	-7958.18	-7871.05	-12412.3	-9.31573	-7.53416	-8.19364	-9557.77	-9473.5	-8618.01	-9.72036	-9.47942	-9.4212	-11249.7	-10784.3	-12073.2	-9.34064	-8.33999	-8.27375	-9732.6	-9926.96	-10026.5
208.5	-8.60677	-7.32293	-7.99551	-9995.51	-8971.8	-9941.48	-6.78191	-6.69246	-7.89874	-7931.28	-7854.13	-12403.2	-9.27843	-7.50987	-8.15401	-9519.5	-9442.96	-8576.33	-9.7058	-9.44478	-9.40181	-11232.9	-10744.9	-12048.4	-9.29625	-8.33825	-8.28249	-9686.34	-9924.89	-10037.1
208.4	-8.62104	-7.31975	-7.98252	-10012.1	-8967.9	-9925.33	-6.76526	-6.66984	-7.88472	-7911.81	-7827.58	-12381.2	-9.22859	-7.49335	-8.10656	-9468.36	-9422.18	-8526.42	-9.67798	-9.40881	-9.38668	-11200.7	-10704	-12029	-9.26159	-8.3465	-8.2951	-9650.23	-9934.71	-10052.4
208.3	-8.64092	-7.30932	-7.96929	-10035.2	-8955.12	-9908.88	-6.74833	-6.65274	-7.86756	-7892.01	-7807.52	-12354.3	-9.18086	-7.47506	-8.04605	-9419.39	-9399.19	-8462.77	-9.64746	-9.36984	-9.37424	-11165.3	-10659.6	-12013	-9.24055	-8.36092	-8.30157	-9628.31	-9951.88	-10060.2
208.2	-8.64996	-7.28567	-7.95198	-10045.7	-8926.15	-9887.36	-6.74882	-6.65062	-7.85773	-7892.58	-7805.03	-12338.8	-9.14677	-7.45322	-7.98178	-9384.42	-9371.72	-8395.18	-9.60391	-9.35593	-9.36921	-11114.9	-10643.8	-12006.6	-9.2303	-8.37502	-8.31033	-9617.63	-9968.66	-10070.9
208.1	-8.65738	-7.26011	-7.93368	-10054.3	-8894.83	-9864.6	-6.75206	-6.64911	-7.84166	-7896.37	-7803.26	-12313.6	-9.12024	-7.44249	-7.91672	-9357.2	-9358.23	-8326.75	-9.55485	-9.34528	-9.35865	-11058.2	-10631.7	-11993.1	-9.20968	-8.38258	-8.31883	-9596.14	-9977.66	-10081.2
208	-8.66865	-7.23201	-7.9188	-10067.4	-8860.4	-9846.1	-6.75407	-6.64466	-7.81934	-7898.72	-7798.03	-12278.6	-9.10054	-7.42992	-7.84592	-9336.99	-9342.43	-8252.28	-9.51019	-9.32447	-9.35153	-11006.5	-10608	-11983.9	-9.19121	-8.37716	-8.33022	-9576.9	-9971.21	-10095
207.9	-8.68461	-7.20052	-7.90414	-10085.9	-8821.82	-9827.87	-6.75278	-6.64428	-7.80067	-7897.21	-7797.59	-12249.2	-9.08628	-7.43923	-7.78967	-9322.36	-9354.13	-8193.12	-9.4634	-9.29789	-9.34804	-10952.3	-10577.8	-11979.5	-9.17875	-8.37405	-8.33193	-9563.91	-9967.5	-10097
207.8	-8.69468	-7.15453	-7.87745	-10097.6	-8765.48	-9794.69	-6.75804	-6.64382	-7.7808	-7903.36	-7797.05	-12218	-9.07541	-7.44136	-7.7274	-9311.2	-9356.81	-8127.62	-9.42155	-9.26648	-9.34332	-10903.9	-10542	-11973.4	-9.15864	-8.3815	-8.32467	-9542.96	-9976.37	-10088.2
207.7	-8.6993	-7.10837	-7.85331	-10103	-8708.92	-9764.67	-6.76648	-6.63771	-7.77532	-7913.23	-7789.88	-12209.4	-9.07235	-7.43977	-7.67558	-9308.06	-9354.81	-8073.12	-9.38325	-9.24146	-9.3351	-10859.6	-10513.6	-11962.9	-9.14651	-8.40338	-8.32567	-9530.32	-10002.4	-10089.4
207.6	-8.68878	-7.05627	-7.8181	-10090.8	-8645.09	-9720.89	-6.779	-6.64244	-7.76861	-7927.87	-7795.43	-12198.9	-9.07365	-7.44794	-7.62676	-9309.4	-9365.08	-8021.77	-9.34376	-9.22492	-9.31669	-10813.9	-10494.8	-11939.3	-9.13393	-8.42001	-8.31772	-9517.21	-10022.2	-10079.8
207.5	-8.67366	-7.0133	-7.77133	-10073.2	-8592.45	-9662.74	-6.80065	-6.63689	-7.75577	-7953.19	-7788.91	-12178.7	-9.06084	-7.44478	-7.58856	-9296.26	-9361.11	-7981.59	-9.30477	-9.20439	-9.29969	-10768.7	-10471.4	-11917.5	-9.12983	-8.42892	-8.31821	-9512.94	-10032.8	-10080.4
207.4	-8.65407	-6.95174	-7.71981	-10050.4	-8517.03	-9598.68	-6.80661	-6.62268	-7.72724	-7960.16	-7772.24	-12133.9	-9.03509	-7.43416	-7.53744	-9269.84	-9347.76	-7927.82	-9.27082	-9.1826	-9.27934	-10729.5	-10446.6	-11891.4	-9.13446	-8.43646	-8.31925	-9517.77	-10041.8	-10081.7
207.3	-8.62651	-6.88074	-7.67063	-10018.4	-8430.04	-9537.53	-6.80597	-6.61287	-7.69644	-7959.42	-7760.73	-12085.6	-9.01242	-7.42676	-7.49201	-9246.58	-9338.45	-7880.04	-9.2329	-9.16665	-9.2555	-10685.6	-10428.5	-11860.9	-9.13442	-8.4453	-8.31313	-9517.72	-10052.3	-10074.2
207.2	-8.59859	-6.80689	-7.61916	-9986.01	-8339.56	-9473.53	-6.80327	-6.60477	-7.67264	-7956.26	-7751.22	-12048.2	-8.9957	-7.43754	-7.45586	-9229.42	-9352.01	-7842.02	-9.19907	-9.14788	-9.24312	-10646.4	-10407.1	-11845	-9.13119	-8.45494	-8.30751	-9514.36	-10063.8	-10067.4
207.1	-8.57024	-6.7382	-7.57841	-9953.08	-8255.41	-9422.87	-6.80064	-6.60307	-7.64244	-7953.18	-7749.22	-12000.8	-8.97402	-7.45358	-7.43115	-9207.18	-9372.18	-7816.03	-9.16951	-9.12849	-9.21726	-10612.2	-10385.1	-11811.9	-9.12995	-8.44951	-8.30287	-9513.07	-10057.3	-10061.8
207	-8.53569	-6.67549	-7.53782	-9912.96	-8178.58	-9372.4	-6.79108	-6.6028	-7.60488	-7942	-7748.91	-11941.8	-8.93243	-7.46654	-7.40429	-9164.51	-9388.47	-7787.78	-9.14407	-9.11047	-9.19422	-10582.8	-10364.6	-11782.3	-9.13377	-8.43821	-8.29032	-9517.05	-10043.9	-10046.6
206.9	-8.50547	-6.61226	-7.49355	-9877.86	-8101.11	-9317.35	-6.78194	-6.61119	-7.56389	-7931.31	-7758.75	-11877.4	-8.9022	-7.47042	-7.38039	-9133.49	-9393.35	-7762.64	-9.1239	-9.0956	-9.17223	-10559.4	-10347.6	-11754.2	-9.14132	-8.43179	-8.26497	-9524.91	-10036.2	-10015.9
206.8	-8.47173	-6.54357	-7.45887	-9838.68	-8016.95	-9274.23	-6.77569	-6.62345	-7.52649	-7924	-7773.14	-11818.7	-8.88013	-7.45138	-7.36677	-9110.85	-9369.41	-7748.31	-9.1122	-9.08096	-9.1435	-10545.9	-10331	-11717.3	-9.14184	-8.41537	-8.24206	-9525.46	-10016.7	-9988.12
206.7	-8.43069	-6.48803	-7.42489	-9791.02	-7948.91	-9231.98	-6.76128	-6.62603	-7.48099	-7907.15	-7776.17	-11747.3	-8.8558	-7.44336	-7.35677	-9085.89	-9359.33	-7737.8	-9.10008	-9.07739	-9.11593	-10531.8	-10326.9	-11682	-9.13806	-8.39339	-8.21363	-9521.52	-9990.52	-9953.67
206.6	-8.37695	-6.43272	-7.39192	-9728.61	-7881.14	-9190.99	-6.74448	-6.619	-7.43606	-7887.5	-7767.92	-11676.7	-8.82158	-7.43366	-7.35385	-9050.78	-9347.13	-7734.72	-9.08576	-9.05668	-9.09119	-10515.3	-10303.4	-11650.3	-9.12227	-8.37706	-8.18211	-9505.06	-9971.09	-9915.47
206.5	-8.32495	-6.38057	-7.34994	-9668.22	-7817.25	-9138.79	-6.7213	-6.61967	-7.3853	-7860.4	-7768.71	-11597	-8.76735	-7.42448	-7.34547	-8995.14	-9335.59	-7725.91	-9.07579	-9.04076	-9.06478	-10503.7	-10285.2	-11616.5	-9.12112	-8.36598	-8.14828	-9503.87	-9957.9	-9874.48
206.4	-8.25885	-6.33608	-7.29409	-9591.45	-7762.74	-9069.35	-6.68593	-6.6238	-7.32972	-7819.03	-7773.55	-11509.7	-8.70347	-7.41552	-7.33057	-8929.6	-9324.32	-7710.24	-9.07012	-9.02825	-9.03674	-10497.2	-10271	-11580.5	-9.11734	-8.35491	-8.10551	-9499.93	-9944.72	-9822.64
206.3	-8.19369	-6.2855	-7.24214	-9515.78	-7700.77	-9004.75	-6.65793	-6.6353	-7.28443	-7786.29	-7787.05	-11438.6	-8.64402	-7.40247	-7.31319	-8868.61	-9307.91	-7691.96	-9.05137	-9.01743	-8.99844	-10475.5	-10258.7	-11531.4	-9.11904	-8.3469	-8.06727	-9501.7	-9935.19	-9776.3
206.2	-8.1342	-6.23689	-7.20551	-9446.69	-7641.22	-8959.21	-6.62168	-6.64676	-7.23857	-7743.89	-7800.5	-11366.6	-8.58604	-7.38008	-7.29669	-8809.12	-9279.76	-7674.6	-9.02393	-9.00047	-8.95878	-10443.7	-10239.4	-11480.6	-9.11707	-8.33032	-8.02933	-9499.65	-9915.45	-9730.33
206.1	-8.05984	-6.19899	-7.1781	-9360.33	-7594.78	-8925.13	-6.57893	-6.65099	-7.16867	-7693.9	-7805.46	-11256.8	-8.51313	-7.35526	-7.27742	-8734.31	-9248.55	-7654.34	-9.01018	-8.979	-8.92277	-10427.8	-10215	-11434.5	-9.10369	-8.29865	-7.98686	-9485.7	-9877.76	-9678.86
206	-7.98622	-6.16912	-7.1449	-9274.83	-7558.19	-8883.85	-6.53565	-6.64689	-7.09373	-7643.28	-7800.65	-11139.2	-8.44277	-7.31603	-7.25934	-8662.13	-9199.22	-7635.32	-9.0027	-8.95716	-8.88816	-10419.1	-10190.1	-11390.1	-9.09596	-8.25606	-7.94226	-9477.65	-9827.06	-9624.81
205.9	-7.918	-6.13963	-7.11558	-9195.6	-7522.06	-8847.39	-6.49063	-6.65352	-7.02858	-7590.63	-7808.43	-11036.9	-8.37755	-7.26562	-7.24008	-8595.21	-9135.83	-7615.06	-9.00111	-8.93163	-8.85896	-10417.3	-10161.1	-11352.7	-9.07851	-8.19632	-7.89338	-9459.47	-9755.95	-9565.58
205.8	-7.85218	-6.11922	-7.08566	-9119.16	-7497.05	-8810.19	-6.44487	-6.65989	-6.96448	-7537.12	-7815.91	-10936.2	-8.31684	-7.20748	-7.2295	-8532.92	-9062.73	-7603.93	-8.99487	-8.90655	-8.8311	-10410.1	-10132.6	-11317	-9.05746	-8.14565	-7.84746	-9437.53	-9695.64	-9509.93
205.7	-7.79294	-6.09937	-7.05485	-9050.36	-7472.73	-8771.88	-6.39578	-6.65933	-6.88773	-7479.71	-7815.25	-10815.7	-8.25225	-7.13711	-7.21122	-8466.66	-8974.25	-7584.71	-9.00073	-8.86349	-8.81005	-10416.9	-10083.6	-11290	-9.03269	-8.09049	-7.79721	-9411.73	-9629.99	-9449.03
205.6	-7.73697	-6.09229	-7.01599	-8985.36	-7464.06	-8723.56	-6.33781	-6.65464	-6.80924	-7411.91	-7809.75	-10692.4	-8.17388	-7.04924	-7.19466	-8386.25	-8863.76	-7567.29	-9.00482	-8.82691	-8.7911	-10421.6	-10042	-11265.7	-9.02059	-8.0358	-7.73911	-9399.12	-9564.89	-9378.62
205.5	-7.67381	-6.0783	-6.9832	-8912.01	-7446.92	-8682.79	-6.27148	-6.64714	-6.74151	-7334.34	-7800.94	-10586.1	-8.10012	-6.95447	-7.17186	-8310.57	-8744.59	-7543.31	-9.00025	-8.79585	-8.76872	-10416.3	-10006.6	-11237.1	-9.00669	-7.97941	-7.6795	-9384.63	-9497.77	-9306.39
205.4	-7.61572	-6.06493	-6.94544	-8844.55	-7430.54	-8635.84	-6.21331	-6.62398	-6.66419	-7266.31	-7773.76	-10464.7	-8.02717	-6.84502	-7.1473	-8235.73	-8606.97	-7517.48	-8.99126	-8.76596	-8.73443	-10405.9	-9972.62	-11193.1	-8.99363	-7.91971	-7.63161	-9371.03	-9426.71	-9248.35
205.3	-7.55505	-6.05293	-6.90532	-8774.09	-7415.84	-8585.96	-6.15032	-6.60136	-6.57925	-7192.65	-7747.22	-10331.3	-7.95564	-6.74238	-7.1215	-8162.34	-8477.91	-7490.34	-8.97262	-8.73548	-8.68913	-10384.3	-9937.95	-11135.1	-8.98011	-7.84967	-7.58628	-9356.94	-9343.34	-9193.42
205.2	-7.49424	-6.04515	-6.85034	-8703.47	-7406.31	-8517.6	-6.07576	-6.58575	-6.48253	-7105.45	-7728.9	-10179.4	-7.88242	-6.65273	-7.0947	-8087.22	-8365.18	-7462.15	-8.9494	-8.69548	-8.65065	-10357.5	-9892.44	-11085.8	-8.96246	-7.76696	-7.54275	-9338.55	-9244.89	-9140.67
205.1	-7.44326	-6.03643	-6.80061	-8644.26	-7395.62	-8455.76	-5.99021	-6.56836	-6.38032	-7005.4	-7708.49	-10018.9	-7.7954	-6.56667	-7.07307	-7997.94	-8256.97	-7439.4	-8.92551	-8.65419	-8.61444	-10329.8	-9845.47	-11039.4	-8.93345	-7.68366	-7.49619	-9308.32	-9145.74	-9084.24
205	-7.38817	-6.03001	-6.74403	-8580.28	-7387.76	-8385.41	-5.90627	-6.54654	-6.28053	-6907.24	-7682.88	-9862.2	-7.71505	-6.48614	-7.04207	-7915.5	-8155.71	-7406.8	-8.89791	-8.60874	-8.58038	-10297.9	-9793.76	-10995.7	-8.89615	-7.61674	-7.44163	-9269.46	-9066.09	-9018.12
204.9	-7.33619	-6.02407	-6.68754	-8519.91	-7380.48	-8315.17	-5.82525	-6.5188	-6.1884	-6812.49	-7650.33	-9717.53	-7.65648	-6.41472	-7.0164	-7855.41	-8065.91	-7379.8	-8.87037	-8.55484	-8.55165	-10266	-9732.44	-10958.9	-8.83969	-7.53223	-7.38059	-9210.63	-8965.5	-8944.15
204.8	-7.29239	-6.01715	-6.64699	-8469.05	-7372	-8264.75	-5.75489	-6.48134	-6.09441	-6730.2	-7606.36	-9569.94	-7.61233	-6.33361	-6.98553	-7810.11	-7963.92	-7347.33	-8.84348	-8.50395	-8.52187	-10234.9	-9674.54	-10920.7	-8.77983	-7.44294	-7.32054	-9148.25	-8859.22	-8871.38
204.7	-7.25151	-6.02531	-6.6043	-8421.57	-7382	-8211.67	-5.682	-6.43801	-5.99303	-6644.96	-7555.51	-9410.75	-7.56341	-6.24165	-6.94092	-7759.92	-7848.29	-7300.41	-8.82918	-8.44524	-8.49229	-10218.3	-9607.75	-10882.8	-8.70875	-7.33573	-7.25021	-9074.19	-8731.61	-8786.15
204.6	-7.20901	-6.02579	-6.55404	-8372.21	-7382.59	-8149.18	-5.60851	-6.40155	-5.89362	-6559.02	-7512.72	-9254.64	-7.49906	-6.14173	-6.88971	-7693.9	-7722.65	-7246.54	-8.81503	-8.39177	-8.46387	-10201.9	-9546.92	-10846.4	-8.64432	-7.23578	-7.17465	-9007.06	-8612.64	-8694.58
204.5	-7.17575	-6.00399	-6.49835	-8333.59	-7355.88	-8079.94	-5.53187	-6.35876	-5.80594	-6469.39	-7462.51	-9116.96	-7.44125	-6.05703	-6.84245	-7634.59	-7616.15	-7196.84	-8.78236	-8.33379	-8.42633	-10164.1	-9480.96	-10798.3	-8.57209	-7.14329	-7.10509	-8931.8	-8502.55	-8610.29
204.4	-7.13596	-5.97305	-6.44403	-8287.38	-7317.97	-8012.4	-5.44385	-6.31022	-5.71884	-6366.45	-7405.54	-8980.19	-7.3812	-5.98267	-6.79098	-7572.98	-7522.65	-7142.7	-8.74579	-8.27907	-8.38629	-10121.8	-9418.71	-10747	-8.49224	-7.05998	-7.03021	-8848.6	-8403.39	-8519.54
204.3	-7.08113	-5.94049	-6.38393	-8223.7	-7278.08	-7937.67	-5.34328	-6.24334	-5.61667	-6248.84	-7327.05	-8819.75	-7.31861	-5.93664	-6.73714	-7508.76	-7464.77	-7086.07	-8.69888	-8.22739	-8.35207	-10067.5	-9359.92	-10703.1	-8.41984	-6.98142	-6.95475	-8773.16	-8309.88	-8428.1
204.2	-7.02388	-5.89263	-6.31771	-8157.21	-7219.44	-7855.33	-5.23938	-6.16589	-5.51336	-6127.33	-7236.16	-8657.53	-7.23931	-5.86991	-6.68107	-7427.4	-7380.86	-7027.1	-8.65229	-8.16527	-8.30777	-10013.6	-9289.24	-10646.4	-8.34447	-6.88052	-6.87878	-8694.63	-8189.78	-8336.03
204.1	-6.96989	-5.85424	-6.24167	-8094.51	-7172.41	-7760.79	-5.13321	-6.09422	-5.41239	-6003.16	-7152.05	-8498.98	-7.15723	-5.80793	-6.6099	-7343.19	-7302.93	-6952.24	-8.59444	-8.1075	-8.25323	-9946.65	-9223.52	-10576.5	-8.2738	-6.7841	-6.80373	-8620.99	-8075.01	-8245.09
204	-6.89872	-5.81315	-6.16575	-8011.86	-7122.07	-7666.39	-5.02304	-6.02389	-5.32516	-5874.32	-7069.51	-8362	-7.09088	-5.75051	-6.53759	-7275.11	-7230.73	-6876.19	-8.5356	-8.04066	-8.19493	-9878.55	-9147.48	-10501.8	-8.18668	-6.68629	-6.72952	-8530.21	-7958.59	-8155.15
203.9	-6.83284	-5.7579	-6.09283	-7935.35	-7054.38	-7575.72	-4.91836	-5.94243	-5.23504	-5751.9	-6973.91	-8220.49	-7.02143	-5.67453	-6.45546	-7203.86	-7135.19	-6789.8	-8.47613	-7.96527	-8.12733	-9809.73	-9061.71	-10415.1	-8.08354	-6.58853	-6.65047	-8422.75	-7842.23	-8059.36
203.8	-6.76093	-5.7069	-6.02111	-7851.83	-6991.89	-7486.55	-4.80837	-5.85653	-5.1495	-5623.27	-6873.1	-8086.17	-6.94137	-5.59778	-6.36937	-7121.72	-7038.68	-6699.26	-8.43015	-7.88173	-8.07149	-9756.51	-8966.67	-10343.6	-7.98028	-6.48178	-6.55693	-8315.15	-7715.16	-7946
203.7	-6.67004	-5.65586	-5.9508	-7746.28	-6929.36	-7399.12	-4.70005	-5.76431	-5.07276	-5496.59	-6764.87	-7965.66	-6.84143	-5.51646	-6.27908	-7019.18	-6936.43	-6604.29	-8.38654	-7.8068	-8.0106	-9706.04	-8881.43	-10265.5	-7.8762	-6.36965	-6.44412	-8206.71	-7581.7	-7809.29
203.6	-6.59048	-5.5957	-5.88312	-7653.88	-6855.65	-7314.97	-4.59671	-5.65369	-5.01679	-5375.74	-6635.05	-7877.77	-6.74117	-5.41223	-6.19468	-6916.32	-6805.37	-6515.52	-8.33151	-7.72537	-7.94166	-9642.35	-8788.79	-10177.2	-7.76684	-6.26154	-6.33478	-8092.76	-7453.02	-7676.79
203.5	-6.51051	-5.52803	-5.82356	-7561.01	-6772.75	-7240.91	-4.48596	-5.53382	-4.9546	-5246.22	-6494.37	-7780.12	-6.64152	-5.31362	-6.10867	-6814.08	-6681.38	-6425.05	-8.27816	-7.64084	-7.85564	-9580.61	-8692.63	-10067	-7.66198	-6.13549	-6.23133	-7983.5	-7302.98	-7551.42
203.4	-6.42943	-5.44431	-5.76334	-7466.85	-6670.18	-7166.04	-4.36591	-5.41601	-4.88567	-5105.82	-6356.12	-7671.88	-6.54041	-5.20766	-6.01546	-6710.34	-6548.14	-6327.02	-8.21837	-7.56296	-7.76531	-9511.41	-8604.02	-9951.2	-7.55353	-6.00931	-6.12832	-7870.5	-7152.79	-7426.59
203.3	-6.3356	-5.3494	-5.69293	-7357.88	-6553.9	-7078.49	-4.24389	-5.29988	-4.80978	-4963.13	-6219.83	-7552.71	-6.41664	-5.11391	-5.92201	-6583.35	-6430.26	-6228.73	-8.16027	-7.47798	-7.66439	-9444.17	-8507.35	-9821.87	-7.44905	-5.87312	-6.01878	-7761.63	-6990.68	-7293.85
203.2	-6.22712	-5.26159	-5.62183	-7231.89	-6446.32	-6990.09	-4.11214	-5.17733	-4.7317	-4809.05	-6076.01	-7430.1	-6.27041	-5.02426	-5.82801	-6433.33	-6317.53	-6129.86	-8.07765	-7.39418	-7.55289	-9348.55	-8412.01	-9678.99	-7.33918	-5.74772	-5.90386	-7647.15	-6841.42	-7154.58
203.1	-6.12186	-5.16341	-5.53617	-7109.65	-6326.03	-6883.58	-3.9856	-5.06964	-4.65652	-4661.06	-5949.62	-7312.05	-6.11912	-4.94739	-5.72894	-6278.1	-6220.88	-6025.66	-7.98496	-7.30203	-7.43887	-9241.28	-8307.18	-9532.87	-7.22808	-5.61154	-5.7986	-7531.39	-6679.33	-7027.02
203	-6.00169	-5.0783	-5.44156	-6970.09	-6221.75	-6765.94	-3.85651	-4.95706	-4.57301	-4510.09	-5817.5	-7180.91	-5.96567	-4.86183	-5.62345	-6120.67	-6113.29	-5914.7	-7.88772	-7.20878	-7.32955	-9128.74	-8201.09	-9392.78	-7.10184	-5.46263	-5.69209	-7399.85	-6502.08	-6897.95
202.9	-5.86359	-4.99559	-5.34306	-6809.7	-6120.42	-6643.47	-3.71188	-4.84933	-4.48462	-4340.95	-5691.07	-7042.12	-5.81076	-4.77418	-5.51093	-5961.73	-6003.08	-5796.35	-7.79147	-7.10813	-7.21181	-9017.35	-8086.59	-9241.89	-6.95853	-5.30545	-5.5762	-7250.53	-6315	-6757.51
202.8	-5.73833	-4.92237	-5.24651	-6664.23	-6030.71	-6523.42	-3.56035	-4.73451	-4.40764	-4163.74	-5556.32	-6921.24	-5.64854	-4.66994	-5.40088	-5795.3	-5872.01	-5680.6	-7.70114	-7.01116	-7.09625	-8912.8	-7976.27	-9093.8	-6.8057	-5.1386	-5.46376	-7091.28	-6116.4	-6621.25
202.7	-5.60251	-4.83505	-5.15285	-6506.5	-5923.73	-6406.97	-3.41812	-4.62184	-4.335	-3997.41	-5424.09	-6807.17	-5.47311	-4.55694	-5.27553	-5615.31	-5729.92	-5548.76	-7.60483	-6.91911	-6.97354	-8801.34	-7871.55	-8936.55	-6.64031	-4.99189	-5.348	-6918.95	-5941.77	-6480.96
202.6	-5.4528	-4.75069	-5.0528	-6332.63	-5820.38	-6282.57	-3.27659	-4.50868	-4.26567	-3831.89	-5291.29	-6698.3	-5.29813	-4.45185	-5.14477	-5435.78	-5597.78	-5411.23	-7.50716	-6.80831	-6.84136	-8688.3	-7745.49	-8767.16	-6.46179	-4.83532	-5.2257	-6732.94	-5755.41	-6332.75
202.5	-5.30237	-4.65636	-4.96301	-6157.93	-5704.81	-6170.92	-3.13747	-4.38559	-4.18782	-3669.19	-5146.84	-6576.06	-5.13787	-4.34904	-5.0156	-5271.36	-5468.51	-5275.37	-7.41172	-6.69382	-6.70776	-8577.85	-7615.24	-8595.96	-6.27944	-4.6607	-5.10009	-6542.94	-5547.56	-6180.53
202.4	-5.15746	-4.56177	-4.87177	-5989.64	-5588.92	-6057.48	-3.00055	-4.2554	-4.10647	-3509.07	-4994.05	-6448.31	-4.96184	-4.23375	-4.88073	-5090.76	-5323.54	-5133.51	-7.30229	-6.57552	-6.56381	-8451.2	-7480.66	-8411.48	-6.1053	-4.48734	-4.97896	-6361.49	-5341.21	-6033.74
202.3	-4.99851	-4.46323	-4.75962	-5805.04	-5468.19	-5918.03	-2.84955	-4.14314	-4.02381	-3332.48	-4862.3	-6318.52	-4.76753	-4.13075	-4.75338	-4891.4	-5194.03	-4999.57	-7.18659	-6.45762	-6.42558	-8317.3	-7346.53	-8234.34	-5.93276	-4.31395	-4.85162	-6181.71	-5134.83	-5879.43
202.2	-4.84006	-4.34888	-4.64373	-5621.02	-5328.09	-5773.93	-2.70115	-4.03143	-3.93206	-3158.93	-4731.2	-6174.44	-4.56933	-4.04058	-4.6362	-4688.05	-5080.65	-4876.32	-7.04343	-6.34454	-6.27228	-8151.61	-7217.89	-8037.89	-5.75058	-4.15504	-4.73213	-5991.89	-4945.68	-5734.62
202.1	-4.69335	-4.23662	-4.52116	-5450.64	-5190.56	-5621.53	-2.54881	-3.91064	-3.82786	-2980.77	-4589.44	-6010.82	-4.38388	-3.95946	-4.50958	-4497.78	-4978.65	-4743.14	-6.88981	-6.23109	-6.12651	-7973.82	-7088.82	-7851.09	-5.56317	-4.00727	-4.62771	-5796.62	-4769.79	-5608.08
202	-4.53034	-4.13982	-4.38345	-5261.33	-5071.96	-5450.31	-2.39991	-3.80583	-3.70677	-2806.64	-4466.44	-5820.67	-4.21723	-3.85925	-4.36701	-4326.8	-4852.64	-4593.19	-6.73854	-6.10785	-5.98574	-7798.75	-6948.61	-7670.69	-5.36325	-3.86298	-4.50217	-5588.31	-4598.05	-5455.94
201.9	-4.3704	-4.03733	-4.23487	-5075.58	-4946.39	-5265.56	-2.25888	-3.6998	-3.58752	-2641.7	-4342.01	-5633.42	-4.03693	-3.72779	-4.22091	-4141.82	-4687.35	-4439.52	-6.58174	-5.97616	-5.83977	-7617.28	-6798.8	-7483.63	-5.16703	-3.7235	-4.37476	-5383.85	-4432.03	-5301.54
201.8	-4.2112	-3.93094	-4.07928	-4890.69	-4816.05	-5072.11	-2.11408	-3.58372	-3.47232	-2472.36	-4205.78	-5452.52	-3.86028	-3.5743	-4.07854	-3960.58	-4494.35	-4289.78	-6.43638	-5.84672	-5.69098	-7449.05	-6651.54	-7292.96	-4.95319	-3.5825	-4.2401	-5161.04	-4264.19	-5138.36
201.7	-4.0578	-3.82871	-3.92264	-4712.54	-4690.8	-4877.34	-1.96932	-3.48251	-3.35889	-2303.07	-4087	-5274.4	-3.70709	-3.42808	-3.94024	-3803.41	-4310.49	-4144.31	-6.29099	-5.71719	-5.53976	-7280.79	-6504.18	-7099.17	-4.74139	-3.46459	-4.10701	-4940.35	-4123.85	-4977.07
201.6	-3.87909	-3.71617	-3.77074	-4505	-4552.92	-4688.47	-1.81494	-3.35677	-3.22922	-2122.53	-3939.43	-5070.79	-3.56032	-3.26187	-3.80658	-3652.82	-4101.49	-4003.73	-6.1504	-5.59326	-5.39977	-7118.08	-6363.19	-6919.77	-4.52116	-3.3238	-3.97026	-4710.88	-3956.27	-4811.35
201.5	-3.71829	-3.5855	-3.62015	-4318.25	-4392.83	-4501.23	-1.67518	-3.22782	-3.09005	-1959.08	-3788.1	-4852.25	-3.41781	-3.1135	-3.67733	-3506.61	-3914.93	-3867.79	-6.00338	-5.46408	-5.25168	-6947.93	-6216.23	-6730	-4.31146	-3.17952	-3.82185	-4492.38	-3784.53	-4631.5
201.4	-3.57189	-3.45938	-3.47068	-4148.23	-4238.31	-4315.38	-1.52313	-3.10633	-2.9536	-1781.26	-3645.52	-4637.98	-3.27405	-2.96592	-3.54773	-3359.12	-3729.37	-3731.48	-5.85783	-5.3442	-5.10723	-6779.48	-6079.85	-6544.89	-4.10703	-3.03999	-3.66998	-4279.37	-3618.45	-4447.46
201.3	-3.42353	-3.32395	-3.3078	-3975.93	-4072.39	-4112.86	-1.37328	-2.97804	-2.81072	-1606.02	-3494.97	-4413.62	-3.11903	-2.81771	-3.40758	-3200.07	-3543.01	-3584.07	-5.6896	-5.21821	-4.95877	-6584.78	-5936.51	-6354.64	-3.89896	-2.90909	-3.51325	-4062.57	-3462.65	-4257.52
201.2	-3.27539	-3.17762	-3.13167	-3803.89	-3893.11	-3893.86	-1.22004	-2.85167	-2.6551	-1426.81	-3346.66	-4169.25	-2.97284	-2.67617	-3.25588	-3050.08	-3365.03	-3424.51	-5.51067	-5.06595	-4.81609	-6377.69	-5763.29	-6171.79	-3.69039	-2.77965	-3.35606	-3845.25	-3308.57	-4067.03
201.1	-3.12969	-3.02217	-2.94542	-3634.68	-3702.66	-3662.28	-1.05398	-2.71603	-2.48266	-1232.6	-3187.48	-3898.48	-2.83397	-2.52319	-3.10221	-2907.6	-3172.67	-3262.88	-5.32386	-4.91928	-4.67374	-6161.49	-5596.43	-5989.37	-3.47922	-2.64399	-3.19851	-3625.22	-3147.1	-3876.11
201	-2.98595	-2.86841	-2.74821	-3467.75	-3514.28	-3417.08	-0.898982	-2.58104	-2.3087	-1051.34	-3029.05	-3625.31	-2.69038	-2.36106	-2.94428	-2760.28	-2968.81	-3096.77	-5.12081	-4.77237	-4.53802	-5926.5	-5429.3	-5815.45	-3.25927	-2.52025	-3.02952	-3396.04	-2999.82	-3671.32
200.9	-2.83328	-2.71706	-2.5425	-3290.44	-3328.85	-3161.3	-0.729114	-2.44883	-2.12471	-852.681	-2873.9	-3336.39	-2.51824	-2.21219	-2.78505	-2583.67	-2781.62	-2929.29	-4.90794	-4.61563	-4.39609	-5680.13	-5250.99	-5633.56	-3.0233	-2.38829	-2.85562	-3150.17	-2842.75	-3460.58
200.8	-2.66739	-2.55751	-2.33882	-3097.78	-3133.37	-2908.05	-0.541189	-2.29337	-1.95173	-632.907	-2691.45	-3064.77	-2.37466	-2.07778	-2.62278	-2436.36	-2612.61	-2758.62	-4.68703	-4.44561	-4.25153	-5424.47	-5057.56	-5448.31	-2.78644	-2.25205	-2.66506	-2903.37	-2680.58	-3229.65
200.7	-2.5053	-2.38608	-2.12708	-2909.54	-2923.34	-2644.77	-0.3481	-2.1406	-1.77271	-407.094	-2512.16	-2783.65	-2.22981	-1.92621	-2.45583	-2287.74	-2422.03	-2583.02	-4.47225	-4.26087	-4.09763	-5175.89	-4847.39	-5251.09	-2.55736	-2.10706	-2.47322	-2664.67	-2508	-2997.17
200.6	-2.32644	-2.19553	-1.9327	-2701.82	-2689.89	-2403.09	-0.139904	-1.97917	-1.59368	-163.614	-2322.71	-2502.53	-2.09005	-1.76144	-2.27674	-2144.35	-2214.85	-2394.66	-4.26442	-4.08403	-3.94065	-4935.37	-4646.21	-5049.92	-2.3171	-1.96192	-2.28179	-2414.33	-2335.24	-2765.18
200.5	-2.15842	-1.98258	-1.72371	-2506.69	-2428.99	-2143.23	0.0814492	-1.82222	-1.4139	95.2528	-2138.52	-2220.22	-1.91619	-1.59854	-2.10548	-1965.98	-2010.01	-2214.53	-4.0541	-3.89634	-3.7714	-4691.95	-4432.68	-4833.03	-2.08709	-1.82703	-2.08294	-2174.67	-2174.69	-2524.21
200.4	-2.00028	-1.77691	-1.52199	-2323.03	-2177.01	-1892.42	0.291485	-1.64115	-1.23682	340.885	-1926.02	-1942.16	-1.74094	-1.44809	-1.92453	-1786.17	-1820.84	-2024.21	-3.83259	-3.70487	-3.61354	-4435.59	-4214.86	-4630.73	-1.86583	-1.68446	-1.89165	-1944.13	-2004.99	-2292.39
200.3	-1.82964	-1.56201	-1.31405	-2124.86	-1913.72	-1633.87	0.497927	-1.45477	-1.06078	582.313	-1707.29	-1665.72	-1.55867	-1.29547	-1.7417	-1599.17	-1628.93	-1831.91	-3.5975	-3.50191	-3.4496	-4163.51	-3983.96	-4420.64	-1.65139	-1.55613	-1.70427	-1720.69	-1852.24	-2065.32
200.2	-1.66115	-1.3463	-1.109	-1929.18	-1649.44	-1378.91	0.71444	-1.24407	-0.88024	835.52	-1460.01	-1382.22	-1.37338	-1.15403	-1.5545	-1409.06	-1451.08	-1635.01	-3.35552	-3.29	-3.28241	-3883.46	-3742.88	-4206.39	-1.44425	-1.39062	-1.51116	-1504.85	-1655.23	-1831.3
200.1	-1.49622	-1.12337	-0.903777	-1737.64	-1376.31	-1123.74	0.924856	-1.04104	-0.699595	1081.6	-1221.74	-1098.56	-1.18804	-0.98053	-1.36377	-1218.91	-1232.92	-1434.4	-3.11799	-3.08974	-3.11785	-3608.56	-3515.05	-3995.51	-1.25277	-1.22442	-1.32652	-1305.34	-1457.41	-1607.54
200	-1.32756	-0.896324	-0.684238	-1541.77	-1098.14	-850.77	1.16444	-0.815504	-0.519071	1361.78	-957.058	-815.088	-0.976855	-0.797313	-1.15989	-1002.24	-1002.55	-1219.96	-2.87914	-2.89003	-2.94198	-3332.13	-3287.85	-3770.13	-1.05212	-1.07223	-1.13788	-1096.27	-1276.26	-1378.94
199.9	-1.13235	-0.661597	-0.459035	-1315.06	-810.565	-570.756	1.41134	-0.585983	-0.338083	1650.53	-687.697	-530.886	-0.76478	-0.613655	-0.957677	-784.65	-771.613	-1007.28	-2.63397	-2.69151	-2.76538	-3048.39	-3062	-3543.82	-0.843406	-0.922942	-0.949096	-878.798	-1098.56	-1150.16
199.8	-0.939809	-0.424126	-0.227088	-1091.45	-519.624	-282.357	1.65226	-0.33921	-0.150158	1932.28	-398.09	-235.79	-0.555215	-0.426858	-0.747063	-569.64	-536.734	-785.755	-2.37922	-2.48261	-2.58954	-2753.56	-2824.35	-3318.48	-0.635462	-0.774375	-0.755898	-662.128	-921.727	-916.033
199.7	-0.738004	-0.193878	0.0120899	-857.084	-237.533	15.0324	1.88361	-0.0876117	0.0425181	2202.84	-102.819	66.7654	-0.344937	-0.210951	-0.534831	-353.899	-265.251	-562.531	-2.1389	-2.26831	-2.40818	-2475.43	-2580.55	-3086.07	-0.452774	-0.605246	-0.556918	-471.774	-720.415	-674.9
199.6	-0.523804	0.0470006	0.252141	-608.322	57.5835	313.508	2.11006	0.152888	0.236	2467.66	179.426	370.586	-0.146342	0.00599483	-0.316202	-150.144	7.53794	-332.579	-1.89788	-2.05056	-2.21265	-2196.48	-2332.83	-2835.5	-0.268128	-0.428156	-0.341633	-279.379	-509.628	-414.007
199.5	-0.303793	0.302932	0.475727	-352.811	371.142	591.511	2.36423	0.408889	0.417779	2764.91	479.864	656.031	0.0717644	0.224493	-0.0940787	73.629	282.279	-98.9513	-1.6646	-1.83059	-2.00941	-1926.5	-2082.58	-2575.05	-0.0764259	-0.227578	-0.124592	-79.6329	-270.883	-150.987
199.4	-0.074016	0.55365	0.700931	-85.9588	678.313	871.526	2.61545	0.676305	0.610544	3058.7	793.697	958.726	0.266419	0.431433	0.136168	273.341	542.486	143.22	-1.43722	-1.61459	-1.80767	-1663.35	-1836.84	-2316.52	0.123437	0.00098414	0.0878465	128.617	1.17141	106.457
199.3	0.151666	0.803369	0.92668	176.138	984.259	1152.22	2.85412	0.945235	0.800661	3337.82	1109.31	1257.26	0.478193	0.659843	0.374289	490.617	829.691	393.674	-1.19581	-1.37973	-1.60517	-1383.95	-1569.65	-2057.02	0.322013	0.238423	0.29577	335.526	283.791	358.428
199.2	0.393813	1.05068	1.16697	457.356	1287.26	1450.99	3.09838	1.21326	1.01461	3623.48	1423.86	1593.22	0.720648	0.899546	0.630485	739.372	1131.09	663.139	-0.948822	-1.14694	-1.39061	-1098.11	-1304.82	-1782.06	0.534593	0.503354	0.515042	557.026	599.135	624.153
199.1	0.629377	1.29352	1.42027	730.93	1584.78	1765.94	3.34075	1.469	1.23255	3906.93	1723.99	1935.45	0.972587	1.15066	0.897567	997.856	1446.85	944.054	-0.700668	-0.89945	-1.15374	-810.908	-1023.26	-1478.51	0.745422	0.761157	0.734724	776.702	905.994	890.374
199	0.893095	1.52332	1.67515	1037.2	1866.32	2082.85	3.59563	1.73921	1.46711	4205	2041.1	2303.78	1.23358	1.42255	1.16533	1265.63	1788.72	1225.69	-0.450666	-0.652507	-0.907881	-521.572	-742.327	-1163.44	0.971501	1.02243	0.954246	1012.27	1216.98	1156.4
198.9	1.1762	1.77398	1.93144	1365.98	2173.42	2401.52	3.84204	2.01058	1.71167	4493.17	2359.57	2687.8	1.4912	1.69437	1.44708	1529.94	2130.51	1522.03	-0.18726	-0.399764	-0.662627	-216.723	-454.793	-849.153	1.20295	1.29733	1.18123	1253.43	1544.19	1431.47
198.8	1.46415	2.02595	2.18743	1700.4	2482.12	2719.81	4.1047	2.27439	1.96754	4800.35	2669.18	3089.59	1.74401	1.96455	1.71955	1789.32	2470.24	1808.61	0.0693558	-0.150502	-0.405146	80.2679	-171.219	-519.192	1.44282	1.57839	1.40927	1503.36	1878.73	1707.82
198.7	1.75023	2.26597	2.4456	2032.64	2776.19	3040.82	4.37703	2.52665	2.22716	5118.83	2965.22	3497.27	2.0016	2.23798	1.98698	2053.6	2814.05	2089.89	0.327774	0.0815987	-0.133838	379.345	92.831	-171.513	1.69237	1.87131	1.62822	1763.39	2227.39	1973.15
198.6	2.035	2.49966	2.70892	2363.36	3062.5	3368.22	4.63599	2.77624	2.48584	5421.68	3258.14	3903.47	2.26838	2.48092	2.26413	2327.32	3119.52	2381.39	0.590497	0.328739	0.138617	683.403	373.991	177.637	1.94611	2.13671	1.86058	2027.77	2543.29	2254.74
198.5	2.33521	2.73866	2.97127	2712.01	3355.31	3694.43	4.88561	3.02645	2.73924	5713.6	3551.78	4301.38	2.51325	2.72104	2.54232	2578.55	3421.45	2673.99	0.847256	0.594442	0.413386	980.56	676.269	529.752	2.20285	2.39128	2.08714	2295.29	2846.3	2529.3
198.4	2.62404	2.9761	3.22835	3047.44	3646.21	4014.08	5.13214	3.28724	2.99414	6001.91	3857.84	4701.64	2.73957	2.99005	2.81998	2810.75	3759.71	2966.03	1.09123	0.853675	0.688206	1262.92	971.186	881.932	2.46705	2.65399	2.3296	2570.57	3159	2823.12
198.3	2.90696	3.21516	3.47918	3376.01	3939.1	4325.95	5.37252	3.52726	3.24423	6283.03	4139.52	5094.35	2.98381	3.28264	3.09394	3061.33	4127.61	3254.18	1.33453	1.09856	0.962974	1544.5	1249.78	1234.05	2.75103	2.92833	2.55448	2866.47	3485.55	3095.64
198.2	3.20258	3.44349	3.72609	3719.33	4218.84	4632.96	5.60336	3.77954	3.48031	6552.99	4435.59	5465.07	3.23247	3.5343	3.36427	3316.45	4444.05	3538.51	1.57905	1.33217	1.23516	1827.49	1515.55	1582.85	3.05964	3.21076	2.77492	3188.03	3821.72	3362.78
198.1	3.49548	3.66921	3.97674	4059.49	4495.39	4944.61	5.83826	4.05736	3.71816	6827.7	4761.63	5838.56	3.51047	3.77819	3.63049	3601.68	4750.72	3818.52	1.8249	1.57465	1.51101	2112.02	1791.41	1936.35	3.36739	3.48952	3.00018	3508.69	4153.52	3635.76
198	3.7963	3.8822	4.2359	4408.85	4756.33	5266.85	6.05717	4.34326	3.95793	7083.71	5097.16	6215.07	3.75274	4.03121	3.90031	3850.24	5068.87	4102.32	2.08107	1.80514	1.78694	2408.5	2053.62	2289.95	3.67457	3.77617	3.22428	3828.76	4494.72	3907.34
197.9	4.09916	4.12103	4.49663	4760.58	5048.94	5591.03	6.28405	4.60236	4.19723	7349.04	5401.23	6590.83	4.00561	4.30485	4.15736	4109.68	5412.94	4372.68	2.33048	2.02486	2.06913	2697.15	2303.59	2651.58	3.98713	4.04509	3.45051	4154.44	4814.81	4181.49
197.8	4.40022	4.37113	4.75031	5110.21	5355.35	5906.45	6.51169	4.84492	4.4462	7615.26	5685.9	6981.79	4.25035	4.57157	4.41557	4360.78	5748.32	4644.26	2.56946	2.23558	2.34799	2973.73	2543.31	3008.94	4.29238	4.31459	3.68999	4472.5	5135.59	4471.71
197.7	4.69947	4.62048	4.99945	5457.75	5660.85	6216.23	6.73991	5.0857	4.68292	7882.16	5968.47	7353.5	4.49995	4.83481	4.66862	4616.87	6079.32	4910.42	2.81287	2.43764	2.61041	3255.43	2773.19	3345.23	4.60438	4.55953	3.93411	4797.59	5427.14	4767.54
197.6	4.99319	4.88276	5.25093	5798.86	5982.19	6528.92	6.95895	5.35756	4.91872	8138.32	6287.52	7723.78	4.74434	5.06579	4.92106	4867.61	6369.75	5175.93	3.05629	2.64855	2.86049	3537.15	3013.13	3665.7	4.92958	4.81894	4.18265	5136.44	5735.91	5068.74
197.5	5.27812	5.14508	5.49538	6129.77	6303.57	6832.86	7.16723	5.60801	5.14294	8381.9	6581.44	8075.86	4.9694	5.28593	5.1732	5098.51	6646.56	5441.13	3.29615	2.86345	3.09996	3814.75	3257.61	3972.58	5.25402	5.08839	4.44081	5474.49	6056.63	5381.59
197.4	5.54856	5.3824	5.73834	6443.84	6594.33	7134.95	7.36844	5.84619	5.36196	8617.21	6860.97	8419.79	5.18698	5.47725	5.43212	5321.75	6887.13	5713.46	3.51169	3.08252	3.33765	4064.2	3506.84	4277.18	5.56737	5.35424	4.69804	5800.99	6373.07	5693.31
197.3	5.83284	5.62151	5.97679	6773.99	6887.28	7431.44	7.5729	6.08106	5.56923	8856.32	7136.6	8745.26	5.41165	5.66442	5.69211	5552.25	7122.48	5986.92	3.72021	3.30135	3.57195	4305.53	3755.79	4577.43	5.89768	5.61735	4.96315	6145.16	6686.25	6014.58
197.2	6.12811	5.87933	6.20787	7116.91	7203.15	7718.76	7.77642	6.30652	5.77281	9094.33	7401.2	9064.94	5.64646	5.84831	5.95291	5793.16	7353.7	6261.23	3.92879	3.52269	3.80447	4546.93	4007.6	4875.41	6.23668	5.86207	5.23502	6498.39	6977.53	6344.05
197.1	6.4222	6.13341	6.43738	7458.45	7514.44	8004.13	7.97942	6.53538	5.96185	9331.74	7669.78	9361.78	5.8985	6.03927	6.20043	6051.75	7593.81	6521.57	4.1258	3.74698	4.02704	4774.94	4262.76	5160.63	6.57344	6.11414	5.49834	6849.28	7277.57	6663.15
197	6.69807	6.38618	6.66687	7778.83	7824.12	8289.47	8.16998	6.74961	6.15266	9554.59	7921.2	9661.41	6.14688	6.2051	6.43899	6306.59	7802.33	6772.48	4.34857	3.95813	4.24851	5032.76	4502.98	5444.44	6.89845	6.34827	5.75145	7187.93	7556.25	6969.88
196.9	6.97161	6.63817	6.88902	8096.51	8132.85	8565.69	8.36312	6.96422	6.34031	9780.46	8173.06	9956.07	6.40398	6.34184	6.67723	6570.37	7974.27	7023.06	4.58579	4.18366	4.47367	5307.3	4759.55	5732.98	7.20846	6.57695	5.99011	7510.95	7828.44	7259.1
196.8	7.24567	6.8897	7.10501	8414.79	8441.02	8834.25	8.56616	7.17426	6.53189	10017.9	8419.56	10256.9	6.679	6.45471	6.90523	6852.53	8116.19	7262.87	4.81528	4.39685	4.70149	5572.9	5002.09	6024.93	7.50445	6.78707	6.23873	7819.36	8078.55	7560.39
196.7	7.49959	7.14768	7.3202	8709.68	8757.09	9101.81	8.78533	7.39471	6.71385	10274.2	8678.28	10542.6	6.93695	6.54786	7.11987	7117.18	8233.32	7488.63	5.04518	4.61595	4.91475	5838.97	5251.35	6298.22	7.78552	6.97111	6.48378	8112.22	8297.61	7857.35
196.6	7.73714	7.39887	7.52412	8985.56	9064.84	9355.36	8.98573	7.60403	6.8933	10508.6	8923.93	10824.4	7.16895	6.62833	7.32795	7355.21	8334.5	7707.48	5.26941	4.82864	5.11286	6098.48	5493.32	6552.1	8.04587	7.17419	6.72704	8383.5	8539.33	8152.15
196.5	7.95176	7.6454	7.72815	9234.81	9366.88	9609.05	9.18209	7.81457	7.06285	10738.2	9171.01	11090.7	7.41471	6.69087	7.5334	7607.36	8413.14	7923.57	5.47934	5.04026	5.30279	6341.44	5734.07	6795.49	8.30009	7.35035	6.96777	8648.38	8749.01	8443.88
196.4	8.1642	7.86631	7.92241	9481.53	9637.53	9850.59	9.38411	8.03105	7.21448	10974.5	9425.07	11328.8	7.6734	6.71666	7.72373	7872.77	8445.57	8123.76	5.69041	5.26102	5.48949	6585.71	5985.22	7034.75	8.5471	7.53179	7.19372	8905.76	8964.97	8717.69
196.3	8.36935	8.06975	8.12005	9719.78	9886.77	10096.3	9.58949	8.26485	7.34707	11214.7	9699.45	11537	7.92812	6.71797	7.9182	8134.11	8447.22	8328.3	5.89614	5.48188	5.66838	6823.81	6236.48	7264	8.79899	7.7137	7.41083	9168.22	9181.5	8980.8
196.2	8.56893	8.27413	8.31928	9951.56	10137.2	10344.1	9.78753	8.50604	7.46514	11446.3	9982.51	11722.4	8.17521	6.70145	8.10344	8387.61	8426.44	8523.14	6.08323	5.70355	5.85451	7040.34	6488.66	7502.52	9.05468	7.88002	7.61452	9434.64	9379.47	9227.64
196.1	8.78562	8.48257	8.51003	10203.2	10392.5	10581.2	9.98572	8.72429	7.58835	11678.1	10238.6	11915.8	8.40993	6.71758	8.27469	8628.43	8446.73	8703.26	6.27562	5.91705	6.03985	7263	6731.55	7740.03	9.29977	8.06687	7.80136	9690.01	9601.87	9454.06
196	8.98918	8.68216	8.70293	10439.6	10637.1	10821.1	10.1939	8.92884	7.71486	11921.5	10478.7	12114.5	8.65922	6.73756	8.44398	8884.2	8471.85	8881.31	6.48494	6.11155	6.2179	7505.25	6952.82	7968.2	9.54904	8.26313	7.97828	9949.74	9835.48	9668.46
195.9	9.1881	8.8919	8.88857	10670.6	10894	11051.9	10.4037	9.1279	7.83825	12166.9	10712.3	12308.3	8.90758	6.75221	8.60245	9139.01	8490.27	9047.99	6.71045	6.31004	6.38965	7766.24	7178.64	8188.3	9.7754	8.44567	8.13651	10185.6	10052.8	9860.21
195.8	9.36913	9.08919	9.07692	10880.9	11135.8	11286.1	10.6061	9.31749	7.97985	12403.6	10934.8	12530.6	9.11631	6.74336	8.77615	9353.17	8479.14	9230.69	6.9247	6.52491	6.55135	8014.2	7423.08	8395.52	9.97896	8.62026	8.27992	10397.7	10260.6	10034
195.7	9.53696	9.27743	9.25546	11075.8	11366.4	11508.1	10.8095	9.48112	8.13543	12641.4	11126.8	12774.9	9.29005	6.73273	8.95506	9531.42	8465.78	9418.86	7.14254	6.73679	6.70434	8266.32	7664.13	8591.57	10.151	8.77952	8.42096	10577	10450.1	10204.9
195.6	9.69432	9.45474	9.42454	11258.5	11583.6	11718.3	11.0022	9.61846	8.29159	12866.8	11288	13020.1	9.43913	6.76233	9.12505	9684.37	8502.99	9597.66	7.34801	6.92877	6.85555	8504.11	7882.54	8785.35	10.3146	8.94629	8.5642	10747.4	10648.6	10378.5
195.5	9.8508	9.63377	9.57323	11440.3	11803	11903.2	11.1852	9.73403	8.44496	13080.8	11423.7	13261	9.60749	6.77879	9.29057	9857.11	8523.69	9771.75	7.53107	7.13225	6.99965	8715.98	8114.03	8970.01	10.4775	9.09631	8.68885	10917.2	10827.2	10529.6
195.4	10.0057	9.78736	9.71038	11620.2	11991.1	12073.7	11.3576	9.83986	8.59117	13282.4	11547.9	13490.6	9.77436	6.80106	9.45457	10028.3	8551.69	9944.25	7.70476	7.32437	7.13959	8916.99	8332.59	9149.34	10.633	9.26893	8.81703	11079.2	11032.7	10684.9
195.3	10.1657	9.92358	9.84219	11806	12158	12237.6	11.5225	9.93408	8.72963	13475.3	11658.4	13708	9.9212	6.8596	9.62477	10179	8625.3	10123.3	7.87634	7.52483	7.26741	9115.57	8560.65	9313.14	10.8042	9.42914	8.9363	11257.6	11223.4	10829.4
195.2	10.3215	10.0723	9.9632	11986.9	12340.2	12388.1	11.6611	10.0086	8.86755	13637.4	11745.9	13924.6	10.0636	6.90825	9.79588	10325.1	8686.48	10303.2	8.02813	7.71883	7.41214	9291.24	8781.35	9498.61	10.978	9.59669	9.04989	11438.7	11422.8	10967.1
195.1	10.49	10.205	10.0712	12182.6	12502.8	12522.4	11.7995	10.0621	8.9971	13799.2	11808.7	14128	10.2227	6.99994	9.96273	10488.3	8801.77	10478.7	8.18769	7.91066	7.56206	9475.91	8999.59	9690.74	11.133	9.73232	9.15254	11600.2	11584.2	11091.5
195	10.6649	10.3345	10.1833	12385.7	12661.5	12661.7	11.9227	10.1033	9.14367	13943.3	11857	14358.1	10.3682	7.09816	10.1318	10637.6	8925.27	10656.6	8.34269	8.10138	7.71199	9655.29	9216.56	9882.87	11.2634	9.85371	9.23032	11736	11728.7	11185.7
194.9	10.8385	10.4847	10.291	12587.3	12845.5	12795.7	12.0285	10.1304	9.30052	14067	11888.8	14604.4	10.523	7.24858	10.2923	10796.4	9114.41	10825.4	8.50717	8.28444	7.85987	9845.65	9424.82	10072.4	11.3768	9.96247	9.31915	11854.2	11858.2	11293.4
194.8	10.9948	10.6236	10.3912	12768.9	13015.7	12920.2	12.1316	10.1369	9.4747	14187.6	11896.5	14877.9	10.6781	7.40475	10.451	10955.5	9310.78	10992.3	8.67688	8.46994	8.00448	10042.1	9635.85	10257.7	11.4653	10.0531	9.39283	11946.4	11966.1	11382.7
194.7	11.1436	10.7456	10.4737	12941.7	13165.1	13022.8	12.2379	10.1517	9.6249	14311.9	11913.8	15113.8	10.8362	7.55954	10.6151	11117.7	9505.41	11164.9	8.84981	8.65054	8.13244	10242.2	9841.31	10421.7	11.5374	10.1362	9.46178	12021.5	12065	11466.2
194.6	11.3029	10.8703	10.5572	13126.7	13317.9	13126.6	12.3491	10.1714	9.7764	14442	11936.9	15351.7	11.0397	7.69158	10.7997	11326.5	9671.44	11359	9.02028	8.8225	8.26019	10439.5	10036.9	10585.4	11.596	10.1966	9.54618	12082.6	12136.9	11568.5
194.5	11.4747	10.9768	10.6446	13326.2	13448.4	13235.3	12.4436	10.1973	9.91705	14552.5	11967.3	15572.6	11.2436	7.84394	10.9686	11535.7	9863.02	11536.7	9.15124	8.99423	8.38608	10591.1	10232.3	10746.7	11.6328	10.2615	9.62022	12120.9	12214.1	11658.2
194.4	11.6485	11.0852	10.7337	13528	13581.2	13346.1	12.5317	10.2262	10.0524	14655.5	12001.3	15785.1	11.4611	8.02291	11.1197	11758.9	10088.1	11695.6	9.26569	9.15267	8.50912	10723.5	10412.6	10904.4	11.6911	10.3364	9.70873	12181.7	12303.3	11765.5
194.3	11.8181	11.1806	10.8349	13725	13698.1	13471.9	12.6211	10.2548	10.1693	14760.1	12034.8	15968.7	11.6535	8.22023	11.2699	11956.3	10336.2	11853.6	9.37436	9.31437	8.63761	10849.3	10596.5	11069	11.7632	10.4203	9.79206	12256.8	12403.1	11866.5
194.2	11.9884	11.2662	10.9323	13922.8	13803	13593	12.6867	10.283	10.2817	14836.8	12067.9	16145.2	11.8527	8.42639	11.4171	12160.7	10595.4	12008.4	9.46445	9.46647	8.76821	10953.5	10769.6	11236.4	11.8304	10.5197	9.86286	12326.8	12521.4	11952.3
194.1	12.1552	11.356	11.0344	14116.5	13913	13720	12.7524	10.3244	10.3849	14913.6	12116.5	16307.2	12.0603	8.60983	11.5654	12373.6	10826.1	12164.4	9.55554	9.62331	8.88631	11059	10948	11387.8	11.8804	10.6032	9.92281	12378.9	12620.8	12024.9
194	12.3182	11.4475	11.1335	14305.8	14025.1	13843.2	12.8071	10.3605	10.4932	14977.6	12158.9	16477.3	12.2286	8.82171	11.7145	12546.3	11092.5	12321.2	9.65854	9.76618	9.00305	11178.2	11110.5	11537.4	11.9287	10.6935	9.98889	12429.3	12728.3	12105
193.9	12.4662	11.5502	11.2432	14477.7	14150.9	13979.6	12.8457	10.3883	10.624	15022.7	12191.5	16682.7	12.3976	9.02308	11.8659	12719.7	11345.7	12480.5	9.74618	9.90999	9.12039	11279.6	11274.1	11687.7	11.9575	10.7714	10.0481	12459.3	12821	12176.8
193.8	12.6056	11.6648	11.3384	14639.6	14291.3	14098	12.8804	10.3976	10.7706	15063.3	12202.4	16912.9	12.528	9.23457	12.0071	12853.5	11611.6	12629	9.84464	10.0381	9.23231	11393.6	11419.9	11831.2	11.9729	10.8502	10.1058	12475.3	12914.8	12246.7
193.7	12.7457	11.7854	11.4246	14802.3	14439.1	14205.2	12.9091	10.4198	10.9074	15096.9	12228.5	17127.7	12.6639	9.44512	12.1502	12992.9	11876.4	12779.5	9.9609	10.1679	9.33262	11528.1	11567.5	11959.7	11.9622	10.9426	10.1754	12464.2	13024.8	12331
193.6	12.8542	11.8809	11.503	14928.3	14556.1	14302.6	12.9218	10.4374	11.0242	15111.7	12249.1	17311.1	12.7928	9.59657	12.2943	13125.2	12066.8	12931.1	10.0592	10.2834	9.43845	11641.9	11698.9	12095.3	11.9665	11.0391	10.2602	12468.6	13139.7	12433.8
193.5	12.9552	11.9745	11.5667	15045.6	14670.7	14381.8	12.9279	10.4687	11.1474	15118.9	12285.8	17504.6	12.917	9.72182	12.4335	13252.6	12224.3	13077.5	10.1269	10.4	9.54012	11720.2	11831.6	12225.6	11.9581	11.1213	10.3441	12459.9	13237.5	12535.5
193.4	13.0584	12.0448	11.65	15165.4	14756.9	14485.4	12.9174	10.4923	11.2603	15106.6	12313.5	17681.8	13.0055	9.83269	12.5593	13343.4	12363.7	13209.8	10.1678	10.5043	9.64061	11767.6	11950.2	12354.4	11.9509	11.1961	10.4243	12452.4	13326.5	12632.7
193.3	13.1476	12.1134	11.7263	15269	14840.9	14580.3	12.8991	10.5192	11.3674	15085.2	12345.1	17850	13.1059	9.97384	12.6534	13446.4	12541.2	13308.8	10.2182	10.5896	9.75162	11825.9	12047.3	12496.6	11.9575	11.2744	10.5036	12459.3	13419.7	12728.8
193.2	13.2225	12.1881	11.7937	15356	14932.4	14664.1	12.8674	10.5552	11.455	15048.1	12387.4	17987.6	13.1933	10.1355	12.7401	13536.1	12744.4	13399.9	10.2699	10.6775	9.8697	11885.7	12147.3	12648	11.9663	11.3565	10.5777	12468.4	13517.5	12818.6
193.1	13.2908	12.2555	11.8695	15435.3	15015	14758.3	12.84	10.5751	11.5434	15016.1	12410.7	18126.4	13.2881	10.2561	12.8309	13633.3	12896.1	13495.4	10.3392	10.7721	9.97465	11965.9	12254.9	12782.5	11.9751	11.4307	10.6391	12477.6	13605.8	12893
193	13.3389	12.3354	11.9256	15491.2	15112.9	14828.1	12.8108	10.5947	11.6181	14981.9	12433.7	18243.7	13.3599	10.3589	12.9214	13707	13025.3	13590.6	10.4047	10.8397	10.0733	12041.7	12331.8	12908.9	11.9849	11.495	10.7009	12487.8	13682.3	12967.9
192.9	13.3867	12.4233	11.9866	15546.7	15220.6	14903.9	12.783	10.6215	11.6846	14949.4	12465.2	18348.1	13.4178	10.431	13.0147	13766.4	13116	13688.8	10.4805	10.9139	10.1629	12129.5	12416.2	13023.7	12.0037	11.5325	10.7575	12507.4	13727	13036.5
192.8	13.4263	12.5239	12.0527	15592.7	15343.8	14986.1	12.7705	10.6535	11.7515	14934.8	12502.7	18453.2	13.4867	10.4536	13.0889	13837.1	13144.4	13766.8	10.5453	10.9727	10.2607	12204.5	12483.1	13149	12.0203	11.5723	10.8186	12524.7	13774.3	13110.5
192.7	13.4593	12.6074	12.1312	15631	15446.1	15083.7	12.7831	10.682	11.8137	14949.5	12536.2	18550.8	13.5405	10.4856	13.1575	13892.3	13184.7	13839	10.6129	11.0406	10.3487	12282.7	12560.4	13261.8	12.0183	11.6228	10.8643	12522.6	13834.4	13165.9
192.6	13.4822	12.6804	12.2072	15657.6	15535.6	15178.2	12.7954	10.7102	11.8671	14963.9	12569.3	18634.7	13.5475	10.493	13.2154	13899.5	13194	13899.9	10.6757	11.0957	10.4352	12355.4	12623.1	13372.6	12.0134	11.6717	10.9143	12517.5	13892.6	13226.5
192.5	13.511	12.7499	12.2765	15691.1	15620.7	15264.4	12.7984	10.7508	11.9011	14967.4	12616.9	18688.1	13.5622	10.5303	13.2574	13914.6	13240.9	13944	10.7433	11.1513	10.5214	12433.6	12686.3	13483.1	12.0213	11.7119	10.9549	12525.7	13940.5	13275.7
192.4	13.5101	12.8015	12.3458	15690	15683.9	15350.6	12.8111	10.7756	11.9258	14982.3	12646	18726.9	13.5493	10.5083	13.2855	13901.3	13213.2	13973.6	10.8	11.1848	10.5922	12499.2	12724.4	13573.8	12.0606	11.764	10.9698	12566.7	14002.5	13293.7
192.3	13.5138	12.8579	12.4067	15694.3	15753	15426.3	12.8263	10.8094	11.9384	15000	12685.7	18746.7	13.5397	10.4943	13.3043	13891.5	13195.6	13993.4	10.8329	11.2104	10.66	12537.3	12753.5	13660.7	12.1163	11.8234	10.9649	12624.7	14073.2	13287.8
192.2	13.4996	12.9136	12.4727	15677.8	15821.3	15508.3	12.8402	10.8257	11.941	15016.3	12704.8	18750.7	13.478	10.4719	13.3096	13828.2	13167.4	13998.9	10.8723	11.2313	10.7287	12582.9	12777.3	13748.8	12.1578	11.8921	10.9484	12668	14155	13267.8
192.1	13.4664	12.9562	12.5208	15639.3	15873.5	15568.1	12.8461	10.8509	11.9551	15023.2	12734.4	18772.9	13.3598	10.4522	13.3013	13706.9	13142.7	13990.2	10.9107	11.2577	10.793	12627.3	12807.4	13831.2	12.1942	11.9856	10.9038	12705.9	14266.3	13213.7
192	13.4225	12.9963	12.5548	15588.3	15922.6	15610.4	12.8555	10.8846	11.9726	15034.2	12773.9	18800.4	13.2426	10.4091	13.3017	13586.7	13088.5	13990.6	10.9417	11.2792	10.8495	12663.2	12831.8	13903.6	12.2311	12.0796	10.8655	12744.3	14378.2	13167.3
191.9	13.3682	13.0299	12.5845	15525.2	15963.8	15647.4	12.8624	10.9098	11.9993	15042.3	12803.5	18842.3	13.1247	10.3455	13.3075	13465.7	13008.5	13996.7	10.9679	11.2886	10.8957	12693.5	12842.5	13962.8	12.2578	12.1576	10.8153	12772.2	14471	13106.5
191.8	13.3141	13.0555	12.5884	15462.4	15995.1	15652.2	12.8582	10.9241	12.0322	15037.4	12820.3	18893.9	12.987	10.2635	13.3055	13324.4	12905.4	13994.6	10.9942	11.2791	10.9203	12724	12831.7	13994.3	12.2903	12.2106	10.7545	12806	14534.1	13032.8
191.7	13.2552	13.0681	12.5684	15394	16010.6	15627.3	12.8379	10.9376	12.0517	15013.6	12836.1	18924.6	12.8324	10.1776	13.2992	13165.8	12797.4	13988	11.0305	11.2866	10.9306	12766	12840.2	14007.5	12.323	12.2513	10.6898	12840.1	14582.5	12954.4
191.6	13.192	13.0827	12.5411	15320.6	16028.5	15593.4	12.8354	10.9448	12.0556	15010.7	12844.6	18930.7	12.6796	10.096	13.2751	13009	12694.8	13962.6	11.0716	11.2736	10.9454	12813.6	12825.4	14026.5	12.3694	12.265	10.6274	12888.5	14598.8	12878.8
191.5	13.1286	13.0705	12.4858	15247	16013.5	15524.6	12.847	10.9697	12.0457	15024.3	12873.8	18915.1	12.5275	10.0167	13.2333	12853	12595.1	13918.7	11.1044	11.2704	10.9391	12851.5	12821.8	14018.4	12.3942	12.2781	10.5445	12914.3	14614.4	12778.3
191.4	13.072	13.049	12.4098	15181.2	15987.2	15430.1	12.8559	11.003	12.0068	15034.7	12912.9	18854.1	12.3396	9.96173	13.1789	12660.2	12525.9	13861.5	11.1225	11.2469	10.92	12872.5	12795.1	13993.9	12.435	12.2704	10.4681	12956.8	14605.3	12685.7
191.3	13.0159	13.0193	12.3341	15116.1	15950.8	15336	12.8537	11.0224	11.9502	15032.1	12935.7	18765.2	12.1833	9.9041	13.1121	12499.8	12453.5	13791.2	11.1245	11.2353	10.8996	12874.8	12781.9	13967.8	12.4626	12.2521	10.3893	12985.6	14583.5	12590.3
191.2	12.9432	12.9689	12.2508	15031.6	15889	15232.4	12.8514	11.0207	11.893	15029.4	12933.7	18675.4	12.0202	9.83883	13.033	12332.5	12371.4	13708	11.1104	11.2063	10.8703	12858.5	12748.9	13930.2	12.505	12.2157	10.3046	13029.7	14540.2	12487.6
191.1	12.8824	12.9337	12.1693	14961	15845.9	15131.1	12.8618	11.0239	11.8472	15041.6	12937.4	18603.4	11.8641	9.80101	12.9542	12172.3	12323.8	13625.1	11.0901	11.1782	10.8297	12835	12716.9	13878.2	12.5263	12.1648	10.2069	13051.9	14479.6	12369.2
191	12.8234	12.8965	12.0928	14892.5	15800.3	15036	12.8777	11.012	11.7882	15060.2	12923.5	18510.8	11.7075	9.77554	12.874	12011.7	12291.8	13540.8	11.0779	11.1485	10.7914	12820.8	12683.1	13829.1	12.55	12.1189	10.1186	13076.6	14424.9	12262.2
190.9	12.7675	12.8651	11.9988	14827.6	15761.9	14919.1	12.8926	11.0093	11.7318	15077.6	12920.3	18422.2	11.5788	9.73891	12.8084	11879.6	12245.8	13471.8	11.0716	11.1248	10.7537	12813.6	12656.2	13780.8	12.5654	12.0712	10.0316	13092.7	14368.2	12156.8
190.8	12.7283	12.8317	11.9035	14782.1	15720.9	14800.6	12.9068	11.0083	11.6684	15094.2	12919.1	18322.7	11.4684	9.68987	12.7589	11766.4	12184.1	13419.7	11.0525	11.0977	10.7034	12791.5	12625.3	13716.3	12.5736	12.0116	9.95306	13101.2	14297.2	12061.6
190.7	12.6936	12.7948	11.8194	14741.8	15675.7	14696	12.9361	11.0032	11.609	15128.5	12913.1	18229.4	11.3854	9.63846	12.7033	11681.2	12119.5	13361.2	11.018	11.0648	10.6448	12751.5	12587.9	13641.3	12.5912	11.952	9.87676	13119.6	14226.3	11969.1
190.6	12.6644	12.7604	11.7317	14707.9	15633.6	14587	12.9544	11.0112	11.5418	15149.9	12922.5	18123.9	11.2848	9.58842	12.6406	11578	12056.5	13295.3	10.9732	11.0356	10.5896	12699.7	12554.7	13570.5	12.6064	11.8871	9.80611	13135.4	14149	11883.5
190.5	12.6404	12.7086	11.6598	14680	15570.1	14497.6	12.9795	11.029	11.4838	15179.2	12943.4	18032.8	11.1893	9.55174	12.5772	11480	12010.4	13228.6	10.9316	11.0267	10.5379	12651.5	12544.6	13504.3	12.6176	11.8352	9.7386	13147.1	14087.3	11801.7
190.4	12.6122	12.6543	11.591	14647.2	15503.6	14412.1	13.0084	11.0476	11.4338	15213	12965.2	17954.3	11.0942	9.5242	12.511	11382.4	11975.8	13159	10.8792	11.0153	10.493	12590.9	12531.6	13446.7	12.6172	11.7898	9.67037	13146.7	14033.2	11719
190.3	12.5795	12.5881	11.5199	14609.3	15422.5	14323.6	13.0275	11.0736	11.3842	15235.3	12995.7	17876.4	11.0044	9.49982	12.4512	11290.3	11945.1	13096.1	10.8333	11.0084	10.4428	12537.8	12523.7	13382.4	12.6066	11.7511	9.59581	13135.6	13987.2	11628.7
190.2	12.5463	12.5159	11.4449	14570.7	15334	14230.4	13.0296	11.1008	11.3438	15237.8	13027.7	17813	10.9125	9.48012	12.3905	11196	11920.4	13032.2	10.7859	10.996	10.3932	12482.9	12509.6	13318.8	12.5984	11.696	9.52985	13127.1	13921.6	11548.7
190.1	12.5097	12.4512	11.3775	14528.2	15254.8	14146.6	13.0349	11.1265	11.3119	15244	13057.8	17762.9	10.8458	9.45885	12.3388	11127.6	11893.6	12977.9	10.7366	10.9836	10.3441	12425.8	12495.5	13255.9	12.5926	11.6507	9.46137	13121	13867.6	11465.7
190	12.4595	12.3808	11.3045	14469.9	15168.5	14055.8	13.0494	11.1397	11.2829	15261	13073.3	17717.3	10.7889	9.39872	12.2882	11069.2	11818	12924.6	10.6876	10.9612	10.2937	12369.1	12470	13191.3	12.5842	11.6225	9.40613	13112.3	13834.1	11398.8

## Sheet: Figure 3c
Circular Dichroism Melt at 220 nm (raw data)																	Circular Dichroism Melt at 220 nm (normalized)
	WT			A228S			P317R			F366L			R371H					WT			A228S			P317R			F366L			R371H
	Molar Ellipticity (deg*cm2/dmol)			Molar Ellipticity (deg*cm2/dmol)			Molar Ellipticity (deg*cm2/dmol)			Molar Ellipticity (deg*cm2/dmol)			Molar Ellipticity (deg*cm2/dmol)					Molar Ellipticity (deg*cm2/dmol)			Molar Ellipticity (deg*cm2/dmol)			Molar Ellipticity (deg*cm2/dmol)			Molar Ellipticity (deg*cm2/dmol)			Molar Ellipticity (deg*cm2/dmol)
Temperature (C)	Rep 1	Rep 2	Rep 3	Rep 1	Rep 2	Rep 3	Rep 1	Rep 2	Rep 3	Rep 1	Rep 2	Rep 3	Rep 1	Rep 2	Rep 3		Temperature (C)	Rep 1	Rep 2	Rep 3	Rep 1	Rep 2	Rep 3	Rep 1	Rep 2	Rep 3	Rep 1	Rep 2	Rep 3	Rep 1	Rep 2	Rep 3
25	-10816.3	-8783.04	-11105.4	-7038.74	-9483.18	-13230.6	-9609.68	-11182.6	-9985.73	-10716.3	-10397.2	-11104.6	-10530.7	-8348.36	-12187.4		25	1.12824	0.836768	1.16968	0.567104	0.92993	1.48616	0.893746	1.17004	0.959802	1.08297	1.03232	1.1446	1.00938	0.699709	1.24445
26	-10312.1	-9658.6	-10342	-8879.19	-8565.55	-14552.5	-8446.22	-9664.13	-11085.7	-9561.31	-11488	-12205.8	-10473.2	-10730.4	-11733.5		26	1.05596	0.962279	1.06024	0.84028	0.793728	1.68237	0.689373	0.903311	1.15302	0.899641	1.20546	1.3194	1.00122	1.03771	1.18005
27	-11905.7	-9280.93	-9837.47	-7970.74	-9202.95	-15196.2	-9848.94	-11434.3	-8904.44	-9833.9	-9625.73	-10488.8	-9143.67	-9768.81	-11988		27	1.2844	0.90814	0.98792	0.70544	0.888336	1.77791	0.935774	1.21426	0.769864	0.94291	0.909867	1.04686	0.81256	0.901265	1.21616
28	-12740.9	-9364	-10801.2	-9351.32	-7797.68	-12055.4	-10821.2	-11188.4	-10085.4	-9317.06	-9753.68	-11000	-8594.92	-9612.85	-11933.7		28	1.40412	0.920048	1.12606	0.910358	0.679753	1.31172	1.10655	1.17106	0.977316	0.860873	0.930177	1.128	0.734694	0.879134	1.20846
29	-10240.4	-6356	-12213.7	-7731.99	-8735.22	-14816.4	-9949.08	-12378.2	-9085.46	-10177.9	-10313.8	-11263.9	-11208.6	-8912.87	-11588.2		29	1.04567	0.488855	1.32855	0.670003	0.818911	1.72153	0.953364	1.38007	0.801661	0.99751	1.01909	1.16988	1.10556	0.77981	1.15942
30	-10822.8	-7492.89	-10004.4	-6623.86	-8064.24	-12437.4	-9328.77	-10420.6	-11278.7	-9011.44	-10349.6	-11497.3	-11213.7	-10437.5	-12392		30	1.12917	0.651827	1.01185	0.505525	0.719318	1.36843	0.844401	1.03619	1.18693	0.812363	1.02476	1.20694	1.10628	0.996151	1.27349
31	-11075	-8616.72	-11448.1	-9663.99	-9108.18	-13901.7	-11680.5	-10511.4	-10024.4	-10625.4	-10199.2	-13305.2	-10078	-10079.9	-11332.3		31	1.16532	0.812927	1.2188	0.956767	0.87427	1.58576	1.25751	1.05214	0.966587	1.06855	1.0009	1.49391	0.945138	0.945401	1.12312
32	-12621.3	-6961.48	-10758.2	-8430.6	-8462.04	-13104.9	-9829.76	-10118.4	-10507.5	-10384.1	-10992.5	-11223.8	-11220	-8330.71	-10798.1		32	1.38698	0.575651	1.11991	0.773697	0.778364	1.46751	0.932404	0.983114	1.05145	1.03024	1.12682	1.16352	1.10718	0.697205	1.04731
33	-11518	-8355.76	-11162.8	-5505.17	-8660.78	-13076.6	-9518.68	-10912.5	-10521.7	-9046.19	-11039.3	-9248.19	-11677.6	-10212.6	-9968.71		33	1.22882	0.775518	1.1779	0.339478	0.807862	1.4633	0.877761	1.1226	1.05395	0.817878	1.13425	0.849941	1.17212	0.964231	0.929629
34	-8701.14	-7206.17	-10671.3	-7968.77	-8859.71	-13686.2	-9003.63	-11245.3	-9608.62	-10437.7	-9216.76	-10382	-10555.7	-8375.97	-9652.08		34	0.825029	0.610727	1.10744	0.705148	0.83739	1.55377	0.787288	1.18106	0.89356	1.03876	0.844953	1.02991	1.01293	0.703626	0.8847
35	-9753.37	-7859.46	-10512.3	-5913.72	-8358.53	-12333.1	-10271.2	-12703.2	-8969.04	-11090.9	-8077.51	-9825.91	-11643.9	-10521.6	-10870.3		35	0.975863	0.704374	1.08465	0.40012	0.763	1.35294	1.00995	1.43715	0.781212	1.14243	0.664122	0.941641	1.16733	1.00808	1.05756
36	-10746.4	-8223.53	-11224.4	-7741.39	-9722.29	-13250	-10635	-11742.4	-9702.96	-8386.52	-9514.4	-10499.6	-9408.96	-10030.1	-10494.6		36	1.11821	0.756563	1.18674	0.671399	0.965422	1.48904	1.07386	1.26837	0.910132	0.71317	0.892196	1.04858	0.850204	0.938346	1.00425
37	-9791.01	-7663.74	-9999.98	-8653.71	-9151.92	-10968.4	-7747.21	-10225.6	-8191.62	-8635.96	-8620.48	-8691.35	-10447.5	-9784.3	-11019.4		37	0.981259	0.676318	1.01122	0.806813	0.880762	1.15039	0.566585	1.00193	0.644651	0.752763	0.750306	0.761556	0.997572	0.903462	1.07872
38	-10856.4	-10177	-10141.7	-8307.02	-7857.98	-12063.9	-10885	-8734.86	-8510.85	-8954.42	-9772.39	-9999.28	-11036.8	-10382.6	-10794.8		38	1.13398	1.03659	1.03153	0.755354	0.688703	1.31299	1.11776	0.740075	0.700726	0.803312	0.933147	0.96916	1.08119	0.988363	1.04684
39	-10588.3	-8395.76	-12799.4	-6134.23	-7457.05	-14344.6	-9477.23	-10909.1	-9148.35	-8126.31	-9107.23	-11824.9	-10678.3	-8050.05	-9630.41		39	1.09555	0.781253	1.4125	0.432849	0.629194	1.65151	0.87048	1.122	0.81271	0.671869	0.827567	1.25893	1.03031	0.65738	0.881626
40	-9587.19	-7316.28	-9874.47	-8767.31	-9119.65	-10817.8	-10566.4	-10243.7	-8873.35	-9119.75	-7859.41	-9991.46	-10572.9	-8413.58	-10043.2		40	0.952042	0.62651	0.993224	0.823675	0.875972	1.12803	1.0618	1.00511	0.764403	0.829554	0.629504	0.967919	1.01536	0.708963	0.940199
41	-9031.92	-9904.71	-10518.8	-8911.32	-6926.85	-9003.15	-9762.86	-9422.71	-8042.03	-6987.63	-9089.76	-8991.92	-8423.69	-11171.6	-10037.3		41	0.872445	0.997559	1.08559	0.84505	0.550497	0.85868	0.920654	0.860903	0.618373	0.491129	0.824794	0.809265	0.710398	1.10032	0.939362
42	-9450.33	-8045.87	-10584.9	-6829.69	-5930.81	-11041.9	-9709.61	-9128.87	-7706.17	-7269.98	-8009.65	-9134.11	-8163.36	-9685.72	-9054.47		42	0.932424	0.731096	1.09506	0.536076	0.402656	1.16129	0.9113	0.809287	0.559376	0.535945	0.653351	0.831833	0.673458	0.889474	0.799902
43	-9818.36	-7207.49	-8233.56	-7333.23	-6571.98	-13074.1	-8609.86	-11417.5	-6294.63	-8478.69	-6874.69	-7401.62	-9074.63	-8817.51	-8849.65		43	0.98518	0.610915	0.758001	0.610816	0.497824	1.46292	0.718119	1.2113	0.311426	0.7278	0.473202	0.55684	0.802763	0.76628	0.77084
44	-9465.47	-7648.78	-10221.3	-6398.39	-7211.03	-11186.8	-8482.85	-9126.09	-6419.93	-6560.8	-7280.49	-8569.26	-8212.34	-7349.19	-8879.44		44	0.934593	0.674174	1.04294	0.472058	0.592678	1.18279	0.695807	0.808799	0.333436	0.423379	0.537614	0.742177	0.680408	0.557931	0.775067
45	-10050.1	-6677.77	-10289.6	-7550.29	-6080.83	-11835.5	-7820.79	-8166.07	-7613.78	-6950.23	-5839.71	-5998.92	-7746.66	-6069.74	-7124.74		45	1.0184	0.534981	1.05273	0.643033	0.424923	1.27909	0.579511	0.640163	0.543147	0.485192	0.308922	0.334193	0.61433	0.376383	0.526083
46	-8207.82	-7583.3	-9096.78	-4421.36	-7889.38	-8701.98	-7469.46	-8149.07	-5747.14	-4362.07	-7482.24	-8013.66	-7639.72	-4539.58	-4717.93		46	0.754312	0.664788	0.881742	0.178609	0.693365	0.813978	0.517797	0.637176	0.215254	0.0743803	0.569637	0.653987	0.599156	0.15926	0.184567
47	-10313.4	-7667.87	-7374.8	-6452.2	-5625.25	-11697.4	-7793.22	-9198.37	-5376.82	-5878.5	-4564	-4392.44	-6153.31	-4966.86	-5848.03		47	1.05614	0.67691	0.6349	0.480045	0.357301	1.25859	0.574668	0.821495	0.150203	0.31508	0.106433	0.0792007	0.388241	0.219889	0.344922
48	-9888.28	-8034.5	-6790.2	-5732.71	-5898.57	-10400.7	-6283.38	-8503.81	-6499.1	-4638.72	-4657.79	-5693.13	-5188.42	-4802.45	-3808.44		48	0.995203	0.729466	0.551098	0.373252	0.397871	1.06611	0.309449	0.69949	0.347343	0.118292	0.12132	0.285656	0.251327	0.196559	0.0555136
49	-9485.77	-7890.1	-8084.96	-4518.74	-5725.39	-6500.78	-5575.84	-8527.35	-4401.23	-7390.75	-7334.45	-6471.7	-5359.47	-3710.44	-5378.05		49	0.937503	0.708767	0.7367	0.193063	0.372165	0.487255	0.185163	0.703624	-0.0211689	0.555114	0.546179	0.409237	0.275598	0.0416086	0.278234
50	-7299.88	-5739.73	-7394.19	-5793.61	-4863.08	-7858.9	-5714.61	-8618.11	-5737.83	-4509.05	-6257.41	-6312.92	-3791.68	-3489.07	-5525.98		50	0.624159	0.400513	0.637678	0.382291	0.244173	0.68884	0.209541	0.719567	0.213619	0.0977103	0.375223	0.384034	0.0531357	0.0101973	0.299225
51	-8310.2	-4441.05	-6332.03	-3805.99	-4853.59	-7344.38	-5885.57	-6144.44	-3985.06	-3230.21	-5955.57	-5881.58	-5053.81	-3270.04	-5966.65		51	0.768987	0.21435	0.485419	0.0872706	0.242765	0.61247	0.239571	0.285043	-0.0942719	-0.105276	0.327312	0.315569	0.232226	-0.020883	0.361755
52	-6641.63	-6970.55	-6354.06	-1086.35	-5461.31	-7138.14	-5548.77	-8780.79	-4317.15	-4089.82	-6539.53	-3016.61	-3209.64	-3239.45	-4564		52	0.529801	0.576951	0.488577	-0.316402	0.332968	0.581858	0.180407	0.748144	-0.0359384	0.0311665	0.420002	-0.13918	-0.0294533	-0.0252236	0.162724
53	-7081.44	-4374.16	-6071.54	-5635.99	-4587.92	-7107.2	-6552.42	-6428.06	-3324.95	-3117.09	-4763.19	-5656.35	-4108.25	-4661.89	-6130.28		53	0.592846	0.204761	0.448078	0.358895	0.203332	0.577267	0.356709	0.334864	-0.210228	-0.123232	0.13805	0.279818	0.0980555	0.176614	0.384972
54	-6896.32	-5149.09	-4774.39	-5424.05	-2966.56	-3913.73	-4829.95	-4853.26	-3771.21	-4970.69	-3014.74	-3166.03	-6167.99	-2113.69	-5003.89		54	0.56631	0.315846	0.262134	0.327438	-0.037325	0.103262	0.054141	0.0582353	-0.131837	0.170985	-0.139477	-0.115463	0.390324	-0.184964	0.225142
55	-7324.29	-3907.1	-4242.47	-4780.96	-3833.06	-8058.48	-5500.4	-6253.78	-2422.88	-3495.26	-5590.29	-4940.57	-4626.3	-2146.33	-5218.2		55	0.627659	0.137809	0.185884	0.231984	0.0912888	0.718464	0.171912	0.304251	-0.368684	-0.0632065	0.269333	0.166205	0.171565	-0.180333	0.255553
56	-5779.66	-3657.15	-3718.65	-2545.4	-3658.26	-3759.35	-4961.42	-5765.81	-3503.82	-4927.3	-5012.31	-4693.75	-4441.3	-912.119	-3662.32		56	0.406239	0.10198	0.110795	-0.0998374	0.0653427	0.0803481	0.0772348	0.218533	-0.178807	0.164098	0.177591	0.127028	0.145314	-0.355461	0.0347803
57	-5686.11	-5102.58	-3793.97	-2633.22	-4177.92	-1266.95	-4371.64	-5925.4	-4670.18	-3904.25	-3858.47	-5035.99	-3201.91	-1073.59	-5324.69		57	0.392827	0.309179	0.121592	-0.086803	0.142475	-0.289597	-0.0263666	0.246567	0.0260754	0.00171248	-0.0055544	0.18135	-0.0305503	-0.332549	0.270663
58	-5002.57	-4068.99	-3835.55	-2886.01	-4160.09	-2730.48	-2750.18	-6721.58	-2073.25	-3624.93	-4138.13	-5193.87	-3729.09	-882.846	-4906.86		58	0.294843	0.161016	0.127552	-0.049281	0.139829	-0.0723664	-0.31119	0.386423	-0.4301	-0.0426243	0.0388358	0.20641	0.0442544	-0.359615	0.211375
59	-4167.11	-1682.81	-3644.22	-2175.07	-2671.36	-2498.05	-4894.89	-6011.72	-3655.45	-3811.5	-2780.17	-5367.3	-3678.57	-2471.04	-3583.39		59	0.175081	-0.181041	0.100125	-0.154805	-0.0811416	-0.106865	0.0655474	0.26173	-0.152172	-0.01301	-0.17671	0.233937	0.0370866	-0.134258	0.0235798
60	-6404.68	-2884.16	-3849.79	-4508.88	-4593.9	-4154.2	-4256.95	-5104.25	-4006.07	-4641.36	-4441.07	-5382.37	-4048.12	-2996.77	-3262.13		60	0.495834	-0.0088284	0.129593	0.1916	0.20422	0.138955	-0.046512	0.102324	-0.0905823	0.118711	0.0869198	0.236329	0.0895231	-0.0596582	-0.0220047
61	-4124.87	-5368.83	-2466.11	-2672.77	-5260.06	-4918.03	-3592.7	-7132.03	-3339.57	-4408.57	-3806.13	-4139.65	-4867.39	-4229.26	-5282.91		61	0.169027	0.347346	-0.0687555	-0.0809324	0.303097	0.25233	-0.163194	0.458523	-0.207658	0.0817614	-0.0138615	0.0390764	0.205775	0.115227	0.264734
62	-3891.06	-223.495	-3117.23	-3524.04	-3664.99	-2955.23	-4524.6	-6635.91	-3407.83	-4894.55	-4846.83	-5767.47	-4342.85	-2152.38	-4326.28		62	0.13551	-0.390231	0.024582	0.0454213	0.0663426	-0.039007	0.0005029	0.371375	-0.195669	0.158899	0.151326	0.297456	0.131344	-0.179473	0.128994
63	-4319.65	-2215.83	-2700.16	-1389.06	-3696.87	-1968.06	-6175.89	-6127.28	-3966.75	-4740.45	-3489.85	-3958.16	-4336.89	-4151.46	-4910.3		63	0.196947	-0.104632	-0.0352041	-0.271472	0.0710737	-0.185532	0.290567	0.282029	-0.0974885	0.134439	-0.0640652	0.0102696	0.130498	0.104186	0.211863
64	-4465.48	-2610.56	-4432.29	-4157.62	-3343.97	-3248.83	-3918.63	-5712.86	-3007.57	-2718.5	-4034.4	-3768.99	-3001.9	-2492.65	-6709.92		64	0.217852	-0.0480488	0.213094	0.139462	0.0186938	0.00457182	-0.105941	0.209232	-0.265978	-0.186499	0.0223709	-0.0197573	-0.0589301	-0.131191	0.467221
65	-3642.87	-2402.43	-3292.79	-1082.1	-5451.36	-3978.05	-4435.59	-5294.76	-2018.01	-4296.73	-3524.97	-3897.17	-2719.05	-2566	-3899.07		65	0.0999314	-0.0778832	0.0497484	-0.317033	0.331491	0.112809	-0.0151333	0.135789	-0.439804	0.06401	-0.0584901	0.00058898	-0.0990654	-0.120783	0.0683734
66	-3158.23	-3093.23	-1116.48	-1522.53	-4354.83	-4902.71	-3438.81	-4300.84	-2619.92	-4027.63	-5359.22	-2618.62	-3292.11	-3782.12	-2704.57		66	0.03046	0.0211425	-0.262222	-0.251661	0.168735	0.250056	-0.190226	-0.0388019	-0.334072	0.0212959	0.232656	-0.202353	-0.0177509	0.0517795	-0.101121
67	-3986.51	-2676.18	-3687.82	-812.99	-4435.73	-5387.7	-3434.5	-6619.88	-4699.69	-3915.08	-4449.44	-3958.22	-4016.45	-2989.51	-2738.94		67	0.149192	-0.0386425	0.106376	-0.356977	0.180742	0.322042	-0.190983	0.368559	0.0312597	0.00343082	0.0882488	0.0102785	0.0850299	-0.0606884	-0.0962439
68	-4267.16	-2278.71	-1234.97	-132.458	-3854.44	-956.93	-4257.67	-9521.17	-3372.54	-4932.25	-3247.77	-4619.48	-2944.8	-2403.78	-4850.94		68	0.189424	-0.0956186	-0.245238	-0.457988	0.0944626	-0.335613	-0.0463858	0.878198	-0.201867	0.164884	-0.10249	0.115239	-0.0670323	-0.143801	0.203441
69	-3870.11	-1359.65	-3702.71	-1272.96	-4757.48	-3565.73	-4662.1	-7033.1	-4211.9	-3183.54	-3639.96	-3546.63	-893.607	-1012.9	-4341.01		69	0.132506	-0.227364	0.10851	-0.288704	0.228499	0.0516085	0.0246564	0.441145	-0.0544252	-0.112684	-0.0402378	-0.0550521	-0.358088	-0.341162	0.131084
70	-3786.18	-2107.49	-3718.52	-3791.65	-3961.99	-3209.82	-6203.31	-7472.25	-2911.24	-4719.28	-3502.2	-5008.02	-2956.97	-943.382	-3770.35		70	0.120475	-0.120162	0.110777	0.0851425	0.110426	-0.0012185	0.295385	0.518286	-0.2829	0.13108	-0.0621034	0.17691	-0.0653054	-0.351025	0.0501097
71	-3204.21	-3307.98	-2342.12	-3107.59	-3004.41	-4213.47	-5238.34	-6643.15	-3789.61	-3981.79	-3112.82	-4168.5	-3265.13	-3142.94	-5591.93		71	0.0370501	0.0519262	-0.0865293	-0.0163921	-0.0317073	0.147753	0.125879	0.372647	-0.128605	0.0140199	-0.123909	0.0436558	-0.0215788	-0.0389177	0.308583
72	-3895.43	-118.081	-4294.4	-3403.09	-3658.55	-2013.2	-5124.33	-5462.2	-4684.55	-3934.12	-3256.81	-2887.97	-4210.68	-1927.1	-4805.55		72	0.136135	-0.405342	0.193327	0.0274692	0.0653863	-0.178832	0.105851	0.165201	0.0285992	0.00645325	-0.101054	-0.1596	0.112591	-0.21144	0.196999
73	-2557.64	-2603.72	-4069.72	-2087.11	-4837.53	-3872.86	-5169.12	-5796.1	-2590.84	-3233.59	-5189.68	-3367.67	-3118.05	-3411.16	-4880.54		73	-0.0556339	-0.0490286	0.16112	-0.167862	0.240381	0.0971955	0.113719	0.223854	-0.339181	-0.10474	0.205745	-0.083457	-0.0424493	-0.0008587	0.20764
74	-3933.9	-2267.58	-2750.79	-2463.75	-4241.09	-4625.02	-3399.7	-5220.3	-4281.19	-3880.03	-3031.02	-3571.51	-2501.72	-500.278	-3275.76		74	0.141651	-0.097214	-0.0279463	-0.111957	0.151852	0.208839	-0.197096	0.122709	-0.0422534	-0.0021315	-0.136893	-0.0511021	-0.129904	-0.4139	-0.0200717
75	-3356.03	-3737.55	-1903.54	-3292.17	-4900.3	-835.28	-2912.28	-6974.77	-1528.4	-1919.43	-5062.31	-5682.59	-3643.1	-1820.88	-4182.05		75	0.0588135	0.113504	-0.149399	0.0110047	0.249698	-0.353669	-0.282716	0.430899	-0.525808	-0.313333	0.185527	0.283984	0.0320523	-0.226512	0.108527
76	-2768.66	-2909.59	-2136.14	-2809.42	-2988.48	-3807.63	-4700.86	-6209.46	-4162.53	-4348.03	-3535.12	-3438.95	-3007.83	-1910.23	-7150.33		76	-0.025385	-0.0051828	-0.116055	-0.0606491	-0.0340711	0.0875138	0.0314653	0.296465	-0.0630977	0.0721529	-0.0568786	-0.0721431	-0.0580888	-0.213833	0.529713
77	-3387.09	-1382.93	-3925	-2888.97	-3513.37	-4934.02	-4767.7	-6764.56	-2758.79	-4805.34	-3692.56	-3805.04	-2849.89	-4202.2	-4124.14		77	0.0632665	-0.224028	0.140375	-0.0488419	0.0438368	0.254702	0.0432051	0.393973	-0.309679	0.14474	-0.0318885	-0.0140346	-0.0804999	0.111386	0.10031
78	-4806.4	-2612.77	-3337.37	-1990.5	-4794.39	-5098.92	-3389.9	-6219.36	-3293.13	-4563.37	-3743.68	-2768.03	-1771.68	-1098.69	-3703.88		78	0.266723	-0.047732	0.056139	-0.182201	0.233977	0.27918	-0.198817	0.298203	-0.215817	0.106333	-0.0237748	-0.178638	-0.233494	-0.328988	0.0406777
79	-2760.42	-3286.31	-2669.77	-3023.96	-2019.34	-4632.77	-2897.58	-5568.77	-2403.3	-2166.11	-3514.87	-4271.86	-3972.5	-3020.33	-4933.54		79	-0.0265665	0.0488193	-0.0395611	-0.0288051	-0.17792	0.209989	-0.285299	0.183922	-0.372124	-0.274179	-0.0600929	0.0600621	0.0787936	-0.0563157	0.215161
80	-3165.46	-2913.25	-2016.1	-1046.18	-4127.49	-3435.23	-3275.49	-6086.99	-3703.28	-4267.71	-4817.37	-4752.99	-2769.79	-1286.4	-5363.81		80	0.0314965	-0.0046585	-0.133263	-0.322365	0.13499	0.0322386	-0.218916	0.274952	-0.14377	0.0594034	0.146649	0.13643	-0.0918666	-0.302353	0.276214
81	-1894.33	-4848.04	-3835.05	-2739.78	-4802.92	-5129.25	-2798.72	-6453.18	-3844.38	-3484.8	-1375.13	-3682.2	-3357.87	-1934.86	-2762.47		81	-0.150718	0.272691	0.127481	-0.070986	0.235244	0.28368	-0.302664	0.339277	-0.118985	-0.064866	-0.399729	-0.033534	-0.0084201	-0.210339	-0.092905
82	-3686.03	-2768.35	-1337.97	-1997.64	-2909.17	-2816.24	-3519.42	-5596.04	-4616.93	-3160.72	-5506.48	-2985.03	-3009.8	-2337.58	-4333.99		82	0.106119	-0.0254294	-0.230473	-0.181141	-0.0458431	-0.0596367	-0.176066	0.188711	0.0167212	-0.116306	0.25603	-0.144193	-0.0578094	-0.153195	0.130087
83	-3186.52	-2870.54	-2977.67	-4669.38	-5660.66	-2404.07	-4653.46	-6247.33	-3731.89	-5311.9	-4094.04	-3729.19	-3636.26	-1330.61	-4943.34		83	0.0345148	-0.0107812	0.00457597	0.215423	0.362558	-0.120816	0.023139	0.303118	-0.138745	0.225145	0.0318367	-0.0260752	0.0310824	-0.296079	0.216551
84	-3024.83	-2771.43	-3242.14	-2711.28	-1571.93	-4609.04	-3052.25	-5344.76	-3074.2	-3982.07	-4851.08	-4801.84	-1483.36	775.906	-6628.52		84	0.0113373	-0.0249879	0.0424876	-0.0752162	-0.244329	0.206466	-0.258129	0.144571	-0.254273	0.0140645	0.152	0.144184	-0.274405	-0.594985	0.45567
85	-4764.22	-1531.86	-2520.7	-1000.63	-4887.43	-4397.53	-3729.9	-6750.3	-3963.97	-4723.12	-6009.71	-4279.18	-1619.51	-1505.9	-5023.01		85	0.260676	-0.202679	-0.0609294	-0.329126	0.247787	0.175072	-0.139093	0.391468	-0.0979762	0.131689	0.335906	0.0612235	-0.255086	-0.271206	0.227857
86	-3660.41	-2100.7	-1447.13	-1927.34	-1848.15	-2376.32	-5138.22	-8803.6	-2795.03	-3662.03	-3693.68	-5039.13		-1879.93	-3505.52		86	0.102447	-0.121136	-0.214824	-0.191575	-0.203329	-0.124933	0.108291	0.752151	-0.303312	-0.036735	-0.0317108	0.181849		-0.218134	0.0125313
87	-3119.24	-1392.14	-2143.09	-1244.88	-5094.6	-2370.68	-4952.53	-5979.68	-4493.24	-3390.58	-4053.67	-3985.31		-2332.14	-2957.35		87	0.02487	-0.222707	-0.115059	-0.292872	0.278538	-0.125771	0.0756723	0.256102	-0.0050063	-0.0798213	0.0254298	0.0145782		-0.153966	-0.0652521
88	-2203.36	-2883.3	-2051.15	-3273.48	-3049.92	-3599.71	-5011.1	-4580.99	-2435.54	-2515.86	-4288.24	-3981.68		-4141.61	-4235.83		88	-0.106419	-0.0089521	-0.128239	0.00823085	-0.0249521	0.056653	0.0859613	0.0104092	-0.366461	-0.218664	0.0626611	0.0140019		0.10279	0.116159
89	-3507.13	-4590.29	-994.624	-1657.07	-3697.96	-2612.23	-3522.03	-5570.42	-3386.47	-3637.22	-4044.64	-3090.5		-4545.69	-4188.4		89	0.0804734	0.235743	-0.279691	-0.231692	0.0712357	-0.0899183	-0.175608	0.184212	-0.199421	-0.0406734	0.023996	-0.127452		0.160126	0.109429
90	-2712.15	-2564.21	-3584.54	-4731.31	-4000.21	-1926.04	-2432.78	-5109.12	-3636.08	-4878.49	-4075.68	-2859.97		-4467.18	-5626.55		90	-0.0334854	-0.0546922	0.0915699	0.224616	0.116099	-0.191769	-0.366946	0.103179	-0.155574	0.156351	0.0289222	-0.164044		0.148986	0.313496
91	-3707.46	-1785.73	-3173.86	-2271.69	-3516.23	-3882.12	-4046.55	-5465	-3390.07	-3004.16	-3922.63	-3454.7		-4131.54	-3529.58		91	0.109191	-0.166287	0.0327004	-0.140465	0.0442618	0.09857	-0.0834704	0.165693	-0.198787	-0.141156	0.0046292	-0.0696434		0.101361	0.015945
92	-2722.31	-2684.33	-1979.2	-3456.53	-2715.02	-4006.42	-4377.8	-5667.23	-4007.46	-4878.66	-3094.84	-3720.75		-3488.94	-5420.85		92	-0.0320292	-0.0374731	-0.138553	0.0354002	-0.0746616	0.11702	-0.0252835	0.201217	-0.0903384	0.156377	-0.126764	-0.0274138		0.0101787	0.284308
93	-2088.78	-2496.83	-3038.43	-3092.68	-3955.65	-2620.41	-3346.37	-5784.58	-3309.31	-2856.07	-4647.24	-4289.1		-3454.45	-5066.92		93	-0.122845	-0.0643507	0.0132868	-0.0186053	0.109485	-0.0887045	-0.206464	0.221831	-0.212974	-0.164663	0.119646	0.0627979		0.0052841	0.234086
94	-2795.63	-3017.78	-2276.96	-3049.95	-3214.27	-1200.1	-4045.81	-4903.96	-2172.07	-2887.5	-4038.03	-4046.45		-3858.79	-4195.08		94	-0.0215191	0.0103266	-0.0958688	-0.024948	-0.0005581	-0.299519	-0.0836002	0.067141	-0.412741	-0.159673	0.0229469	0.0242834		0.0626581	0.110376
95	-3528.4	-1878	-1877.44	-4051.28	-3084.25	-345.635	-3320.84	-6668.75	-3268.26	-3048.85	-4923.18	-2889.67		-2560.21	-6681.21		95	0.0835231	-0.15306	-0.153141	0.123678	-0.0198569	-0.426347	-0.21095	0.377144	-0.220185	-0.134063	0.163445	-0.15933		-0.121604	0.463147

## Sheet: Figure 4a
Sample Information	Sample Information			Sample Information	Sample Information			Sample Information	Sample Information			Sample Information	Sample Information			Sample Information	Sample Information
Merge-Set Name:	F366L			Merge-Set Name:	R371H			Merge-Set Name:	P317R			Merge-Set Name:	A228S			Merge-Set Name:	WT PHD2
Date of Measurement:	2022-11-11 13:29:47.309 → 2022-11-11 14:14:04.463			Date of Measurement:	2022-11-04 14:29:38.611 → 2022-11-04 15:14:09.287			Date of Measurement:	2022-10-28 12:35:18.61 → 2022-10-28 13:19:30.308			Date of Measurement:	2022-10-24 15:03:02.884 → 2022-10-24 16:04:32.431			Date of Measurement:	2022-10-13 13:02:52.061 → 2022-10-13 13:48:14.548
Capillary Type:	Unspecified container/capillary type			Capillary Type:	Unspecified container/capillary type			Capillary Type:	Unspecified container/capillary type			Capillary Type:	Unspecified container/capillary type			Capillary Type:	Unspecified container/capillary type
Target:	PHD2 (181-426)			Target:	PHD2 (181-426)			Target:	PHD2 (181-426)			Target:	PHD2 (181-426)			Target:	PHD2 (181-426)
TargetConcentration:	2.5e-08			TargetConcentration:	2.5e-08			TargetConcentration:	2.5e-08			TargetConcentration:	2.5e-08			TargetConcentration:	2.5e-08
Ligand:	WT HIF1a - CODD			Ligand:	WT HIF1a - CODD			Ligand:	WT HIF1a - CODD			Ligand:	WT HIF1a - CODD			Ligand:	WT HIF1a - CODD
Measurement Settings	Measurement Settings			Measurement Settings	Measurement Settings			Measurement Settings	Measurement Settings			Measurement Settings	Measurement Settings			Measurement Settings	Measurement Settings
MST-Power:	Medium			MST-Power:	Medium			MST-Power:	High			MST-Power:	Medium			MST-Power:	Medium
Excitation-Power:	20			Excitation-Power:	20			Excitation-Power:	20			Excitation-Power:	20			Excitation-Power:	20
Excitation type:	Nano - RED			Excitation type:	Nano - RED			Excitation type:	Nano - RED			Excitation type:	Nano - RED			Excitation type:	Nano - RED
Thermostat Setpoint:	(disabled)			Thermostat Setpoint:	(disabled)			Thermostat Setpoint:	(disabled)			Thermostat Setpoint:	(disabled)			Thermostat Setpoint:	(disabled)
Analysis Settings	Analysis Settings			Analysis Settings	Analysis Settings			Analysis Settings	Analysis Settings			Analysis Settings	Analysis Settings			Analysis Settings	Analysis Settings
Type of Analysis:	MST			Type of Analysis:	MST			Type of Analysis:	MST			Type of Analysis:	MST			Type of Analysis:	MST
Evaluation strategy:	On Time			Evaluation strategy:	On Time			Evaluation strategy:	On Time			Evaluation strategy:	On Time			Evaluation strategy:	On Time
Cold Region Start:	-1			Cold Region Start:	-1			Cold Region Start:	-1			Cold Region Start:	-1			Cold Region Start:	-1
Cold Region End:	0			Cold Region End:	0			Cold Region End:	0			Cold Region End:	0			Cold Region End:	0
Hot Region Start:	1.5			Hot Region Start:	1.5			Hot Region Start:	1.5			Hot Region Start:	1.5			Hot Region Start:	1.5
Hot Region End:	2.5			Hot Region End:	2.5			Hot Region End:	2.5			Hot Region End:	2.5			Hot Region End:	2.5
Fit Results (Kd)	Fit Results (Kd)			Fit Results (Kd)	Fit Results (Kd)			Fit Results (Kd)	Fit Results (Kd)			Fit Results (Kd)	Fit Results (Kd)			Fit Results (Kd)	Fit Results (Kd)
Fit Model:	Kd			Fit Model:	Kd			Fit Model:	Kd			Fit Model:	Kd			Fit Model:	Kd
Bound	919.652			Bound	924.235			Bound	944.484			Bound	926.293			Bound	931.955
Unbound	931.349			Unbound	933.691			Unbound	949.682			Unbound	936.55			Unbound	942.737
Kd	1.61025e-05			Kd	1.28258e-05			Kd	0.000319254			Kd	9.26763e-06			Kd	7.47683e-06
TargetConc	00:00:00.002000			TargetConc	00:00:00.002000			TargetConc	00:00:00.002000			TargetConc	00:00:00.002000			TargetConc	00:00:00.002000
Standard Deviation:	0.422139			Standard Deviation:	0.374505			Standard Deviation:	0.450878			Standard Deviation:	0.206443			Standard Deviation:	0.249398
Kd Confidence:	1.82135e-06			Kd Confidence:	1.56861e-06			Kd Confidence:	0.000197832			Kd Confidence:	5.6679e-07			Kd Confidence:	5.19861e-07
Dose Response Curve	Dose Response Curve	Dose Response Curve		Dose Response Curve	Dose Response Curve	Dose Response Curve		Dose Response Curve	Dose Response Curve	Dose Response Curve		Dose Response Curve	Dose Response Curve	Dose Response Curve		Dose Response Curve	Dose Response Curve	Dose Response Curve
Dose (M)	Response (Fraction Bound)	Err-Values		Dose (M)	Response (Fraction Bound)	Err-Values		Dose (M)	Response (Fraction Bound)	Err-Values		Dose (M)	Response (Fraction Bound)	Err-Values		Dose (M)	Response (Fraction Bound)	Err-Values
2.12097e-08	0.0143702	0.0667406		2.12097e-08	0.00464935	0.0151797		2.13165e-08	-0.130793	0.0965958		2.13165e-08	-0.0141782	0.0646704		2.42157e-08	-0.00410462	0.0983922
4.24194e-08	0.0208208	0.0243752		4.24194e-08	0.0354388	0.0865639		4.26331e-08	0.0613286	0.0857928		4.26331e-08	0.033712	0.0691405		4.84314e-08	0.00912755	0.0694196
8.48389e-08	0.0246766	0.0464063		8.48389e-08	-0.00629532	0.0425342		8.52661e-08	0.0397868	0.142739		8.52661e-08	-0.0191815	0.0618614		9.68628e-08	0.0120426	0.0347664
1.69678e-07	0.0274723	0.0427917		1.69678e-07	0.0378055	0.0507389		1.70532e-07	-0.12996	0.114897		1.70532e-07	0.0509447	0.0478364		1.93726e-07	0.0189933	0.0440632
3.39355e-07	0.0668044	0.00999035		3.39355e-07	0.00169521	0.0337836		3.41064e-07	0.10018	0.122332		3.41064e-07	0.0383266	0.0471897		3.87451e-07	0.0316136	0.0845912
6.78711e-07	0.0129203	0.0141946		6.78711e-07	0.0730369	0.0359587		6.82129e-07	0.0541421	0.0622321		6.82129e-07	0.0334415	0.0443046		7.74902e-07	0.123297	0.0657319
1.35742e-06	0.018722	0.0322419		1.35742e-06	0.0994308	0.0661375		1.36426e-06	0.161546	0.148463		1.36426e-06	0.144515	0.124195		1.5498e-06	0.190169	0.038147
2.71484e-06	0.117853	0.0705949		2.71484e-06	0.108419	0.029503		2.72852e-06	-0.102094	0.087536		2.72852e-06	0.230232	0.0527332		3.09961e-06	0.265186	0.0158798
5.42969e-06	0.220409	0.0733343		5.42969e-06	0.281792	0.0387084		5.45703e-06	-0.0409571	0.0102654		5.45703e-06	0.366699	0.0746595		6.19922e-06	0.475431	0.0199664
1.08594e-05	0.381413	0.0287598		1.08594e-05	0.466011	0.0257133		1.09141e-05	0.0129739	0.0637291		1.09141e-05	0.524515	0.0328668		1.23984e-05	0.605018	0.151574
2.17187e-05	0.601448	0.020864		2.17187e-05	0.640217	0.0181893		2.18281e-05	0.116336	0.100798		2.18281e-05	0.715771	0.0719366		2.47969e-05	0.742123	0.0330664
4.34375e-05	0.763974	0.0268465		4.34375e-05	0.781965	0.044519		4.36563e-05	0.0963401	0.237745		4.36563e-05	0.834633	0.0477527		4.95938e-05	0.89582	0.0236473
8.6875e-05	0.878212	0.0554452		8.6875e-05	0.922638	0.0242001		8.73125e-05	0.246132	0.0531369		8.73125e-05	0.89934	0.0446185		9.91875e-05	0.971044	0.00761499
0.00017375	0.943961	0.0257987		0.00017375	0.918979	0.0515751		0.000174625	0.326278	0.0538413		0.000174625	0.958476	0.0516196		0.000198375	0.949526	0.0271205
0.0003475	0.935678	0.02498		0.0003475	1.0134	0.0399918		0.00034925	0.530984	0.102547		0.00034925	0.966704	0.0398051		0.00039675	0.961543	0.0277563
0.000695	0.923482	0.0086945		0.000695	0.895999	0.0549986		0.0006985	0.685893	0.232943		0.0006985	0.980939	0.0408988		0.0007935	0.98659	0.0218752
Dose Response Fit				Dose Response Fit				Dose Response Fit				Dose Response Fit				Dose Response Fit
Dose (M)	Response Fit (Fraction Bound)			Dose (M)	Response Fit (Fraction Bound)			Dose (M)	Response Fit (Fraction Bound)			Dose (M)	Response Fit (Fraction Bound)			Dose (M)	Response Fit (Fraction Bound)
0.000648458	0.975769			0.000648458	0.980604			0.000651724	0.671198			0.000651724	0.985979			0.000740362	0.990002
0.000605033	0.974075			0.000605033	0.979241			0.00060808	0.655723			0.00060808	0.984987			0.000690782	0.989292
0.000564515	0.972266			0.000564515	0.977784			0.000567358	0.639911			0.000567358	0.983927			0.000644522	0.988532
0.000526712	0.970334			0.000526712	0.976227			0.000529364	0.623789			0.000529364	0.982793			0.000601361	0.987719
0.000491439	0.968272			0.000491439	0.974564			0.000493914	0.607388			0.000493914	0.981581			0.000561089	0.986849
0.000458529	0.966072			0.000458529	0.972788			0.000460838	0.590741			0.000460838	0.980285			0.000523515	0.985918
0.000427823	0.963725			0.000427823	0.970892			0.000429977	0.573883			0.000429977	0.9789			0.000488457	0.984923
0.000399173	0.961222			0.000399173	0.968868			0.000401183	0.556852			0.000401183	0.977419			0.000455746	0.983858
0.000372441	0.958554			0.000372441	0.966707			0.000374317	0.539687			0.000374317	0.975838			0.000425226	0.98272
0.0003475	0.955711			0.0003475	0.964403			0.00034925	0.522426			0.00034925	0.974148			0.00039675	0.981502
0.000324229	0.952683			0.000324229	0.961945			0.000325862	0.505112			0.000325862	0.972344			0.000370181	0.980201
0.000302516	0.949458			0.000302516	0.959324			0.00030404	0.487786			0.00030404	0.970418			0.000345391	0.97881
0.000282258	0.946026			0.000282258	0.956532			0.000283679	0.470488			0.000283679	0.968361			0.000322261	0.977323
0.000263356	0.942375			0.000263356	0.953556			0.000264682	0.453262			0.000264682	0.966167			0.00030068	0.975735
0.00024572	0.938493			0.00024572	0.950388			0.000246957	0.436147			0.000246957	0.963827			0.000280545	0.974039
0.000229264	0.934368			0.000229264	0.947016			0.000230419	0.419182			0.000230419	0.961331			0.000261757	0.972227
0.000213911	0.929986			0.000213911	0.943427			0.000214989	0.402407			0.000214989	0.958669			0.000244228	0.970292
0.000199586	0.925336			0.000199586	0.939612			0.000200591	0.385856			0.000200591	0.955834			0.000227873	0.968228
0.000186221	0.920403			0.000186221	0.935556			0.000187158	0.369566			0.000187158	0.952813			0.000212613	0.966025
0.00017375	0.915174			0.00017375	0.931248			0.000174625	0.353567			0.000174625	0.949597			0.000198375	0.963674
0.000162114	0.909635			0.000162114	0.926675			0.000162931	0.33789			0.000162931	0.946173			0.00018509	0.961168
0.000151258	0.903773			0.000151258	0.921823			0.00015202	0.322561			0.00015202	0.942531			0.000172695	0.958496
0.000141129	0.897573			0.000141129	0.916679			0.00014184	0.307604			0.00014184	0.938659			0.000161131	0.955649
0.000131678	0.891021			0.000131678	0.911229			0.000132341	0.293041			0.000132341	0.934544			0.00015034	0.952616
0.00012286	0.884105			0.00012286	0.905459			0.000123479	0.27889			0.000123479	0.930173			0.000140272	0.949387
0.000114632	0.87681			0.000114632	0.899355			0.00011521	0.265166			0.00011521	0.925534			0.000130879	0.94595
0.000106956	0.869124			0.000106956	0.892904			0.000107494	0.251881			0.000107494	0.920612			0.000122114	0.942294
9.97932e-05	0.861035			9.97932e-05	0.886091			0.000100296	0.239045			0.000100296	0.915395			0.000113937	0.938406
9.31103e-05	0.85253			9.31103e-05	0.878904			9.35792e-05	0.226665			9.35792e-05	0.909869			0.000106307	0.934275
8.6875e-05	0.843599			8.6875e-05	0.871329			8.73125e-05	0.214746			8.73125e-05	0.90402			9.91875e-05	0.929888
8.10572e-05	0.834232			8.10572e-05	0.863354			8.14654e-05	0.203288			8.14654e-05	0.897833			9.25452e-05	0.925231
7.56291e-05	0.824422			7.56291e-05	0.854967			7.60099e-05	0.192292			7.60099e-05	0.891296			8.63477e-05	0.920291
7.05644e-05	0.814159			7.05644e-05	0.846157			7.09198e-05	0.181755			7.09198e-05	0.884393			8.05653e-05	0.915055
6.58389e-05	0.80344			6.58389e-05	0.836913			6.61705e-05	0.171673			6.61705e-05	0.877114			7.51701e-05	0.909508
6.14299e-05	0.79226			6.14299e-05	0.827227			6.17393e-05	0.162039			6.17393e-05	0.869443			7.01362e-05	0.903637
5.73161e-05	0.780618			5.73161e-05	0.817092			5.76048e-05	0.152847			5.76048e-05	0.861369			6.54393e-05	0.897428
5.34778e-05	0.768513			5.34778e-05	0.806501			5.37471e-05	0.144086			5.37471e-05	0.852879			6.10571e-05	0.890868
4.98966e-05	0.75595			4.98966e-05	0.79545			5.01479e-05	0.135746			5.01479e-05	0.843965			5.69683e-05	0.883942
4.65552e-05	0.742932			4.65552e-05	0.783937			4.67896e-05	0.127818			4.67896e-05	0.834614			5.31533e-05	0.876637
4.34375e-05	0.729469			4.34375e-05	0.771962			4.36562e-05	0.120288			4.36562e-05	0.824819			4.95937e-05	0.86894
4.05286e-05	0.71557			4.05286e-05	0.759526			4.07327e-05	0.113144			4.07327e-05	0.814573			4.62726e-05	0.860839
3.78145e-05	0.70125			3.78145e-05	0.746635			3.8005e-05	0.106373			3.8005e-05	0.80387			4.31739e-05	0.852322
3.52822e-05	0.686524			3.52822e-05	0.733295			3.54599e-05	0.0999614			3.54599e-05	0.792706			4.02826e-05	0.843379
3.29195e-05	0.671413			3.29195e-05	0.719516			3.30853e-05	0.0938957			3.30853e-05	0.78108			3.7585e-05	0.834
3.0715e-05	0.655938			3.0715e-05	0.705311			3.08696e-05	0.0881622			3.08696e-05	0.768991			3.50681e-05	0.824175
2.86581e-05	0.640124			2.86581e-05	0.690696			2.88024e-05	0.0827467			2.88024e-05	0.756442			3.27197e-05	0.813899
2.67389e-05	0.624001			2.67389e-05	0.675689			2.68736e-05	0.0776356			2.68736e-05	0.74344			3.05285e-05	0.803165
2.49483e-05	0.607597			2.49483e-05	0.660312			2.50739e-05	0.0728151			2.50739e-05	0.72999			2.84841e-05	0.79197
2.32776e-05	0.590947			2.32776e-05	0.64459			2.33948e-05	0.0682718			2.33948e-05	0.716105			2.65766e-05	0.780313
2.17188e-05	0.574086			2.17188e-05	0.628549			2.18281e-05	0.0639924			2.18281e-05	0.701796			2.47969e-05	0.768193
2.02643e-05	0.557051			2.02643e-05	0.612219			2.03664e-05	0.0599639			2.03664e-05	0.687082			2.31363e-05	0.755613
1.89073e-05	0.53988			1.89073e-05	0.595633			1.90025e-05	0.0561739			1.90025e-05	0.671981			2.15869e-05	0.74258
1.76411e-05	0.522614			1.76411e-05	0.578826			1.77299e-05	0.05261			1.77299e-05	0.656515			2.01413e-05	0.7291
1.64597e-05	0.505294			1.64597e-05	0.561833			1.65426e-05	0.0492604			1.65426e-05	0.640709			1.87925e-05	0.715184
1.53575e-05	0.487961			1.53575e-05	0.544695			1.54348e-05	0.0461137			1.54348e-05	0.624592			1.7534e-05	0.700847
1.4329e-05	0.470657			1.4329e-05	0.52745			1.44012e-05	0.0431589			1.44012e-05	0.608194			1.63598e-05	0.686105
1.33695e-05	0.453423			1.33695e-05	0.510139			1.34368e-05	0.0403853			1.34368e-05	0.591548			1.52643e-05	0.670977
1.24741e-05	0.436301			1.24741e-05	0.492804			1.2537e-05	0.037783			1.2537e-05	0.574689			1.42421e-05	0.655485
1.16388e-05	0.419329			1.16388e-05	0.475486			1.16974e-05	0.0353422			1.16974e-05	0.557654			1.32883e-05	0.639656
1.08594e-05	0.402545			1.08594e-05	0.458227			1.09141e-05	0.0330537			1.09141e-05	0.540483			1.23984e-05	0.623517
1.01322e-05	0.385987			1.01322e-05	0.441067			1.01832e-05	0.0309086			1.01832e-05	0.523214			1.15682e-05	0.607099
9.45364e-06	0.369689			9.45364e-06	0.424048			9.50124e-06	0.0288986			9.50124e-06	0.50589			1.07935e-05	0.590435
8.82055e-06	0.353683			8.82055e-06	0.407206			8.86497e-06	0.0270156			8.86497e-06	0.488552			1.00707e-05	0.57356
8.22987e-06	0.337998			8.22987e-06	0.39058			8.27131e-06	0.0252521			8.27131e-06	0.471242			9.39626e-06	0.556513
7.67874e-06	0.322661			7.67874e-06	0.374205			7.71741e-06	0.023601			7.71741e-06	0.454			8.76702e-06	0.539331
7.16452e-06	0.307697			7.16452e-06	0.358112			7.2006e-06	0.0220553			7.2006e-06	0.436868			8.17992e-06	0.522055
6.68473e-06	0.293127			6.68473e-06	0.342334			6.71839e-06	0.0206088			6.71839e-06	0.419886			7.63213e-06	0.504726
6.23707e-06	0.278969			6.23707e-06	0.326896			6.26848e-06	0.0192553			6.26848e-06	0.403091			7.12103e-06	0.487386
5.81939e-06	0.265239			5.81939e-06	0.311825			5.8487e-06	0.017989			5.8487e-06	0.386521			6.64416e-06	0.470076
5.42969e-06	0.251948			5.42969e-06	0.297142			5.45703e-06	0.0168046			5.45703e-06	0.370209			6.19922e-06	0.452837
5.06608e-06	0.239106			5.06608e-06	0.282867			5.09159e-06	0.0156969			5.09159e-06	0.354188			5.78408e-06	0.435712
4.72682e-06	0.226721			4.72682e-06	0.269014			4.75062e-06	0.0146611			4.75062e-06	0.338489			5.39673e-06	0.418738
4.41028e-06	0.214796			4.41028e-06	0.255599			4.43249e-06	0.0136927			4.43249e-06	0.323137			5.03533e-06	0.401955
4.11493e-06	0.203334			4.11493e-06	0.242631			4.13566e-06	0.0127875			4.13566e-06	0.308158			4.69813e-06	0.385398
3.83937e-06	0.192334			3.83937e-06	0.230117			3.8587e-06	0.0119414			3.8587e-06	0.293572			4.38351e-06	0.369103
3.58226e-06	0.181793			3.58226e-06	0.218064			3.6003e-06	0.0111506			3.6003e-06	0.279397			4.08996e-06	0.353101
3.34236e-06	0.171707			3.34236e-06	0.206472			3.3592e-06	0.0104117			3.3592e-06	0.26565			3.81607e-06	0.337423
3.11854e-06	0.16207			3.11854e-06	0.195343			3.13424e-06	0.00972121			3.13424e-06	0.252343			3.56052e-06	0.322094
2.9097e-06	0.152874			2.9097e-06	0.184674			2.92435e-06	0.00907612			2.92435e-06	0.239485			3.32208e-06	0.307138
2.71484e-06	0.14411			2.71484e-06	0.174462			2.72852e-06	0.00847347			2.72852e-06	0.227084			3.09961e-06	0.292578
2.53304e-06	0.135768			2.53304e-06	0.1647			2.5458e-06	0.00791051			2.5458e-06	0.215143			2.89204e-06	0.278431
2.36341e-06	0.127837			2.36341e-06	0.155382			2.37531e-06	0.00738468			2.37531e-06	0.203665			2.69837e-06	0.264712
2.20514e-06	0.120305			2.20514e-06	0.146499			2.21624e-06	0.00689356			2.21624e-06	0.192649			2.51767e-06	0.251434
2.05747e-06	0.113159			2.05747e-06	0.138041			2.06783e-06	0.00643489			2.06783e-06	0.182093			2.34906e-06	0.238607
1.91968e-06	0.106386			1.91968e-06	0.129996			1.92935e-06	0.00600655			1.92935e-06	0.171992			2.19175e-06	0.226236
1.79113e-06	0.0999732			1.79113e-06	0.122355			1.80015e-06	0.00560657			1.80015e-06	0.162341			2.04498e-06	0.214326
1.67118e-06	0.0939062			1.67118e-06	0.115102			1.6796e-06	0.00523308			1.6796e-06	0.153131			1.90803e-06	0.202879
1.55927e-06	0.0881713			1.55927e-06	0.108227			1.56712e-06	0.00488434			1.56712e-06	0.144353			1.78026e-06	0.191894
1.45485e-06	0.0827547			1.45485e-06	0.101716			1.46218e-06	0.00455875			1.46218e-06	0.135998			1.66104e-06	0.181369
1.35742e-06	0.0776426			1.35742e-06	0.095554			1.36426e-06	0.00425476			1.36426e-06	0.128055			1.5498e-06	0.171299
1.26652e-06	0.0728213			1.26652e-06	0.0897283			1.2729e-06	0.00397096			1.2729e-06	0.120511			1.44602e-06	0.161678
1.1817e-06	0.0682772			1.1817e-06	0.0842247			1.18766e-06	0.00370602			1.18766e-06	0.113353			1.34918e-06	0.152498
1.10257e-06	0.0639971			1.10257e-06	0.0790295			1.10812e-06	0.0034587			1.10812e-06	0.10657			1.25883e-06	0.14375
1.02873e-06	0.059968			1.02873e-06	0.0741288			1.03391e-06	0.00322783			1.03391e-06	0.100146			1.17453e-06	0.135424
9.59842e-07	0.0561774			9.59842e-07	0.0695091			9.64676e-07	0.00301232			9.64676e-07	0.0940692			1.09588e-06	0.127509
8.95564e-07	0.0526131			8.95564e-07	0.065157			9.00074e-07	0.00281116			9.00074e-07	0.0883249			1.02249e-06	0.119992
8.35591e-07	0.049263			8.35591e-07	0.0610596			8.39799e-07	0.0026234			8.39799e-07	0.0828992			9.54017e-07	0.112861
7.79634e-07	0.046116			7.79634e-07	0.0572041			7.8356e-07	0.00244815			7.8356e-07	0.0777785			8.90129e-07	0.106103
7.27424e-07	0.0431608			7.27424e-07	0.0535782			7.31088e-07	0.00228458			7.31088e-07	0.072949			8.3052e-07	0.099704
6.78711e-07	0.040387			6.78711e-07	0.05017			6.82129e-07	0.00213191			6.82129e-07	0.0683972			7.74902e-07	0.0936507
6.3326e-07	0.0377845			6.3326e-07	0.0469678			6.36449e-07	0.00198943			6.36449e-07	0.0641098			7.23009e-07	0.0879291
5.90852e-07	0.0353435			5.90852e-07	0.0439605			5.93828e-07	0.00185645			5.93828e-07	0.0600739			6.74592e-07	0.0825253
5.51285e-07	0.0330547			5.51285e-07	0.0411375			5.54061e-07	0.00173235			5.54061e-07	0.0562768			6.29416e-07	0.0774255
5.14367e-07	0.0309095			5.14367e-07	0.0384885			5.16957e-07	0.00161652			5.16957e-07	0.0527062			5.87266e-07	0.072616
4.79921e-07	0.0288993			4.79921e-07	0.0360036			4.82338e-07	0.00150843			4.82338e-07	0.0493504			5.47939e-07	0.0680833
4.47782e-07	0.0270162			4.47782e-07	0.0336736			4.50037e-07	0.00140756			4.50037e-07	0.0461979			5.11245e-07	0.063814
4.17796e-07	0.0252526			4.17796e-07	0.0314895			4.199e-07	0.00131342			4.199e-07	0.0432376			4.77008e-07	0.0597954
3.89817e-07	0.0236014			3.89817e-07	0.0294427			3.9178e-07	0.00122558			3.9178e-07	0.0404589			4.45065e-07	0.0560147
3.63712e-07	0.0220557			3.63712e-07	0.0275252			3.65544e-07	0.0011436			3.65544e-07	0.0378518			4.1526e-07	0.0524598
3.39355e-07	0.0206091			3.39355e-07	0.0257292			3.41064e-07	0.00106709			3.41064e-07	0.0354065			3.87451e-07	0.0491187
3.1663e-07	0.0192555			3.1663e-07	0.0240476			3.18224e-07	0.000995706			3.18224e-07	0.0331138			3.61505e-07	0.0459802
2.95426e-07	0.0179892			2.95426e-07	0.0224733			2.96914e-07	0.000929088			2.96914e-07	0.0309647			3.37296e-07	0.0430331
2.75642e-07	0.0168047			2.75642e-07	0.0209999			2.7703e-07	0.000866924			2.7703e-07	0.028951			3.14708e-07	0.040267
2.57183e-07	0.015697			2.57183e-07	0.0196211			2.58479e-07	0.000808916			2.58479e-07	0.0270646			2.93633e-07	0.0376717
2.39961e-07	0.0146612			2.39961e-07	0.0183312			2.41169e-07	0.000754786			2.41169e-07	0.0252979			2.73969e-07	0.0352376
2.23891e-07	0.0136928			2.23891e-07	0.0171246			2.25019e-07	0.000704276			2.25019e-07	0.0236437			2.55622e-07	0.0329554
2.08898e-07	0.0127875			2.08898e-07	0.0159961			2.0995e-07	0.000657143			2.0995e-07	0.0220953			2.38504e-07	0.0308162
1.94909e-07	0.0119414			1.94909e-07	0.0149409			1.9589e-07	0.000613163			1.9589e-07	0.0206461			2.22532e-07	0.0288118
1.81856e-07	0.0111506			1.81856e-07	0.0139543			1.82772e-07	0.000572125			1.82772e-07	0.0192901			2.0763e-07	0.0269342
1.69678e-07	0.0104117			1.69678e-07	0.013032			1.70532e-07	0.000533832			1.70532e-07	0.0180215			1.93726e-07	0.0251758
1.58315e-07	0.0097212			1.58315e-07	0.0121698			1.59112e-07	0.000498101			1.59112e-07	0.0168349			1.80752e-07	0.0235294
1.47713e-07	0.0090761			1.47713e-07	0.0113641			1.48457e-07	0.00046476			1.48457e-07	0.0157252			1.68648e-07	0.0219882
1.37821e-07	0.00847344			1.37821e-07	0.0106112			1.38515e-07	0.00043365			1.38515e-07	0.0146876			1.57354e-07	0.0205459
1.28592e-07	0.00791048			1.28592e-07	0.00990758			1.29239e-07	0.000404621			1.29239e-07	0.0137174			1.46817e-07	0.0191963
1.1998e-07	0.00738465			1.1998e-07	0.00925023			1.20584e-07	0.000377535			1.20584e-07	0.0128106			1.36985e-07	0.0179338
1.11946e-07	0.00689352			1.11946e-07	0.0086361			1.12509e-07	0.000352262			1.12509e-07	0.0119629			1.27811e-07	0.0167529
1.04449e-07	0.00643485			1.04449e-07	0.00806242			1.04975e-07	0.00032868			1.04975e-07	0.0111707			1.19252e-07	0.0156485
9.74543e-08	0.00600651			9.74543e-08	0.00752656			9.7945e-08	0.000306676			9.7945e-08	0.0104304			1.11266e-07	0.0146158
9.0928e-08	0.00560652			9.0928e-08	0.00702607			9.1386e-08	0.000286144			9.1386e-08	0.00973872			1.03815e-07	0.0136503
8.48389e-08	0.00523303			8.48389e-08	0.00655863			8.52661e-08	0.000266987			8.52661e-08	0.00909246			9.68628e-08	0.0127478
7.91575e-08	0.0048843			7.91575e-08	0.0061221			7.95561e-08	0.000249112			7.95561e-08	0.00848872			9.03762e-08	0.0119043
7.38565e-08	0.0045587			7.38565e-08	0.00571446			7.42285e-08	0.000232434			7.42285e-08	0.00792475			8.4324e-08	0.0111159
6.89106e-08	0.00425472			6.89106e-08	0.00533382			6.92576e-08	0.000216872			6.92576e-08	0.00739797			7.8677e-08	0.0103792
6.42958e-08	0.00397092			6.42958e-08	0.00497841			6.46196e-08	0.000202352			6.46196e-08	0.00690596			7.34083e-08	0.00969087
5.99901e-08	0.00370599			5.99901e-08	0.00464656			6.02922e-08	0.000188803			6.02922e-08	0.00644646			6.84923e-08	0.00904775
5.59728e-08	0.00345866			5.59728e-08	0.00433674			5.62547e-08	0.000176162			5.62547e-08	0.00601735			6.39056e-08	0.00844695
5.22244e-08	0.00322779			5.22244e-08	0.0040475			5.24874e-08	0.000164367			5.24874e-08	0.00561665			5.9626e-08	0.00788573
4.87271e-08	0.00301229			4.87271e-08	0.00377747			4.89725e-08	0.000153361			4.89725e-08	0.00524248			5.56331e-08	0.00736152
4.5464e-08	0.00281113			4.5464e-08	0.00352539			4.5693e-08	0.000143093			4.5693e-08	0.00489312			5.19075e-08	0.00687192
4.24194e-08	0.00262337			4.24194e-08	0.00329008			4.26331e-08	0.000133511			4.26331e-08	0.00456694			4.84314e-08	0.00641467
3.95787e-08	0.00244812			3.95787e-08	0.00307043			3.9778e-08	0.000124572			3.9778e-08	0.0042624			4.51881e-08	0.00598766
3.69283e-08	0.00228455			3.69283e-08	0.0028654			3.71142e-08	0.000116231			3.71142e-08	0.0039781			4.2162e-08	0.00558892
3.44553e-08	0.00213189			3.44553e-08	0.00267403			3.46288e-08	0.000108448			3.46288e-08	0.00371268			3.93385e-08	0.00521659
3.21479e-08	0.0019894			3.21479e-08	0.0024954			3.23098e-08	0.000101186			3.23098e-08	0.00346491			3.67041e-08	0.00486895
2.99951e-08	0.00185643			2.99951e-08	0.00232868			3.01461e-08	9.44106e-05			3.01461e-08	0.00323363			3.42462e-08	0.00454437
2.79864e-08	0.00173232			2.79864e-08	0.00217307			2.81273e-08	8.80887e-05			2.81273e-08	0.00301773			3.19528e-08	0.00424133
2.61122e-08	0.0016165			2.61122e-08	0.00202784			2.62437e-08	8.21902e-05			2.62437e-08	0.00281621			2.9813e-08	0.00395842
2.43636e-08	0.00150841			2.43636e-08	0.0018923			2.44863e-08	7.66866e-05			2.44863e-08	0.00262811			2.78165e-08	0.00369431
2.2732e-08	0.00140754			2.2732e-08	0.0017658			2.28465e-08	7.15515e-05			2.28465e-08	0.00245255			2.59537e-08	0.00344777
2.12097e-08	0.00131341			2.12097e-08	0.00164775			2.13165e-08	6.67602e-05			2.13165e-08	0.00228868			2.42157e-08	0.00321762

## Sheet: Figure 4b
Sample Information	Sample Information			Sample Information	Sample Information			Sample Information	Sample Information			Sample Information	Sample Information			Sample Information	Sample Information
Merge-Set Name:	WT			Merge-Set Name:	A228S			Merge-Set Name:	P317R			Merge-Set Name:	R371H			Merge-Set Name:	F366L
Date of Measurement:	2022-10-14 12:36:35.85 → 2022-10-14 13:24:12.916			Date of Measurement:	2022-11-01 12:55:28.472 → 2022-11-01 13:39:50.968			Date of Measurement:	2022-10-28 11:25:42.165 → 2022-10-28 12:10:18.11			Date of Measurement:	2022-11-04 13:31:32.141 → 2022-11-04 14:16:04.515			Date of Measurement:	2022-11-11 14:29:46.642 → 2022-11-11 15:14:17.114
Capillary Type:	Unspecified container/capillary type			Capillary Type:	Unspecified container/capillary type			Capillary Type:	Unspecified container/capillary type			Capillary Type:	Unspecified container/capillary type			Capillary Type:	Unspecified container/capillary type
Target:	PHD2 (181-426)			Target:	PHD2 (181-426)			Target:	PHD2 (181-426)			Target:	PHD2 (181-426)			Target:	PHD2 (181-426)
TargetConcentration:	2.5e-08			TargetConcentration:	2.5e-08			TargetConcentration:	2.5e-08			TargetConcentration:	2.5e-08			TargetConcentration:	2.5e-08
Ligand:	WT HIF2a - CODD			Ligand:	WT HIF2a - CODD			Ligand:	WT HIF2a - CODD			Ligand:	WT HIF2a - CODD			Ligand:	WT HIF2a - CODD
Measurement Settings	Measurement Settings			Measurement Settings	Measurement Settings			Measurement Settings	Measurement Settings			Measurement Settings	Measurement Settings			Measurement Settings	Measurement Settings
MST-Power:	Medium			MST-Power:	Medium			MST-Power:	High			MST-Power:	Medium			MST-Power:	Medium
Excitation-Power:	20			Excitation-Power:	20			Excitation-Power:	20			Excitation-Power:	20			Excitation-Power:	20
Excitation type:	Nano - RED			Excitation type:	Nano - RED			Excitation type:	Nano - RED			Excitation type:	Nano - RED			Excitation type:	Nano - RED
Thermostat Setpoint:	(disabled)			Thermostat Setpoint:	(disabled)			Thermostat Setpoint:	(disabled)			Thermostat Setpoint:	(disabled)			Thermostat Setpoint:	(disabled)
Analysis Settings	Analysis Settings			Analysis Settings	Analysis Settings			Analysis Settings	Analysis Settings			Analysis Settings	Analysis Settings			Analysis Settings	Analysis Settings
Type of Analysis:	MST			Type of Analysis:	MST			Type of Analysis:	MST			Type of Analysis:	MST			Type of Analysis:	MST
Evaluation strategy:	On Time			Evaluation strategy:	On Time			Evaluation strategy:	On Time			Evaluation strategy:	On Time			Evaluation strategy:	On Time
Cold Region Start:	-1			Cold Region Start:	-1			Cold Region Start:	-1			Cold Region Start:	-1			Cold Region Start:	-1
Cold Region End:	0			Cold Region End:	0			Cold Region End:	0			Cold Region End:	0			Cold Region End:	0
Hot Region Start:	1.5			Hot Region Start:	1.5			Hot Region Start:	1.5			Hot Region Start:	1.5			Hot Region Start:	1.5
Hot Region End:	2.5			Hot Region End:	2.5			Hot Region End:	2.5			Hot Region End:	2.5			Hot Region End:	2.5
Fit Results (Kd)	Fit Results (Kd)			Fit Results (Kd)	Fit Results (Kd)			Fit Results (Kd)	Fit Results (Kd)			Fit Results (Kd)	Fit Results (Kd)			Fit Results (Kd)	Fit Results (Kd)
Fit Model:	Kd			Fit Model:	Kd			Fit Model:	Kd			Fit Model:	Kd			Fit Model:	Kd
Bound	928.571			Bound	920.696			Bound	947.587			Bound	920.787			Bound	913.348
Unbound	943.934			Unbound	935.436			Unbound	952.846			Unbound	935.004			Unbound	930.566
Kd	1.5069e-05			Kd	2.22628e-05			Kd	0.000579174			Kd	3.89633e-05			Kd	4.29639e-05
TargetConc	00:00:00.002000			TargetConc	00:00:00.002000			TargetConc	00:00:00.002000			TargetConc	00:00:00.002000			TargetConc	00:00:00.002000
Standard Deviation:	0.366672			Standard Deviation:	0.333685			Standard Deviation:	0.351609			Standard Deviation:	0.472934			Standard Deviation:	0.550682
Kd Confidence:	1.10216e-06			Kd Confidence:	1.59597e-06			Kd Confidence:	0.00037598			Kd Confidence:	4.35054e-06			Kd Confidence:	4.67315e-06
Dose Response Curve	Dose Response Curve	Dose Response Curve		Dose Response Curve	Dose Response Curve	Dose Response Curve		Dose Response Curve	Dose Response Curve	Dose Response Curve		Dose Response Curve	Dose Response Curve	Dose Response Curve		Dose Response Curve	Dose Response Curve	Dose Response Curve
Dose (M)	Response (Fraction Bound)	Err-Values		Dose (M)	Response (Fraction Bound)	Err-Values		Dose (M)	Response (Fraction Bound)	Err-Values		Dose (M)	Response (Fraction Bound)	Err-Values		Dose (M)	Response (Fraction Bound)	Err-Values
2.85797e-08	0.0121564	0.03311		2.56195e-08	0.0387263	0.041588		2.56195e-08	0.0686977	0.0335876		2.56195e-08	-0.0188722	0.0320577		2.56195e-08	0.0165004	0.00397381
5.71594e-08	0.0191411	0.0547219		5.1239e-08	-0.0161001	0.0492282		5.1239e-08	-0.0233303	0.182519		5.1239e-08	7.33503e-05	0.0177802		5.1239e-08	0.0111973	0.0140573
1.14319e-07	0.010204	0.0425958		1.02478e-07	-0.0073099	0.0177958		1.02478e-07	-0.105592	0.0806161		1.02478e-07	0.0333579	0.014494		1.02478e-07	0.0219621	0.0520728
2.28638e-07	-0.0142416	0.0629886		2.04956e-07	0.0217411	0.0406469		2.04956e-07	-0.0389653	0.0233282		2.04956e-07	-0.00838884	0.0180725		2.04956e-07	0.00778694	0.0194607
4.57275e-07	0.0489353	0.0205164		4.09912e-07	-0.00345626	0.0410447		4.09912e-07	0.0991557	0.104617		4.09912e-07	0.000691293	0.0396499		4.09912e-07	-0.00391321	0.0384096
9.14551e-07	0.0499749	0.0742875		8.19824e-07	0.0402739	0.0506708		8.19824e-07	0.0296465	0.167578		8.19824e-07	0.0488744	0.00135819		8.19824e-07	0.010178	0.0144235
1.8291e-06	0.113942	0.0217881		1.63965e-06	0.0629018	0.00443554		1.63965e-06	-0.0191169	0.187049		1.63965e-06	0.0333487	0.0395203		1.63965e-06	0.0817505	0.0332938
3.6582e-06	0.180166	0.0510928		3.2793e-06	0.135252	0.0465712		3.2793e-06	-0.000941457	0.189927		3.2793e-06	0.0497099	0.0336979		3.2793e-06	0.0143307	0.0219149
7.31641e-06	0.326131	0.110979		6.55859e-06	0.215337	0.0351416		6.55859e-06	0.0108037	0.128155		6.55859e-06	0.183566	0.0239221		6.55859e-06	0.113303	0.01978
1.46328e-05	0.44849	0.0158614		1.31172e-05	0.391873	0.0205156		1.31172e-05	-0.0422648	0.134153		1.31172e-05	0.248936	0.0133187		1.31172e-05	0.230158	0.035556
2.92656e-05	0.684617	0.0165695		2.62344e-05	0.50668	0.0299013		2.62344e-05	0.178931	0.0794672		2.62344e-05	0.377515	0.0295369		2.62344e-05	0.362634	0.0135721
5.85313e-05	0.832841	0.031058		5.24687e-05	0.722358	0.0252687		5.24687e-05	0.0469596	0.0937871		5.24687e-05	0.544994	0.0215231		5.24687e-05	0.546307	0.0500581
0.000117063	0.912939	0.0191182		0.000104937	0.827597	0.0444561		0.000104937	0.09268	0.0964751		0.000104937	0.750334	0.0200329		0.000104937	0.741788	0.0262506
0.000234125	0.931282	0.0282128		0.000209875	0.929673	0.0620735		0.000209875	0.273166	0.234518		0.000209875	0.894405	0.0228797		0.000209875	0.853154	0.0143898
0.00046825	0.94961	0.0652677		0.00041975	0.915435	0.0108176		0.00041975	0.456119	0.0716531		0.00041975	0.94465	0.0426932		0.00041975	0.940348	0.0294986
0.0009365	0.964348	0.0472985		0.0008395	0.980174	0.0606251		0.0008395	0.576334	0.0575937		0.0008395	0.890738	0.0354292		0.0008395	0.890158	0.0188219
Dose Response Fit				Dose Response Fit				Dose Response Fit				Dose Response Fit				Dose Response Fit
Dose (M)	Response Fit (Fraction Bound)			Dose (M)	Response Fit (Fraction Bound)			Dose (M)	Response Fit (Fraction Bound)			Dose (M)	Response Fit (Fraction Bound)			Dose (M)	Response Fit (Fraction Bound)
0.000873785	0.983046			0.000783281	0.972362			0.000783281	0.5749			0.000783281	0.952612			0.000783281	0.948
0.000815271	0.981851			0.000730827	0.970437			0.000730827	0.557878			0.000730827	0.949383			0.000730827	0.944474
0.000760674	0.980574			0.000681886	0.968382			0.000681886	0.540719			0.000681886	0.945946			0.000681886	0.940725
0.000709734	0.979209			0.000636222	0.96619			0.000636222	0.523464			0.000636222	0.94229			0.000636222	0.93674
0.000662206	0.97775			0.000593616	0.963851			0.000593616	0.506152			0.000593616	0.938403			0.000593616	0.932506
0.00061786	0.976191			0.000553863	0.961356			0.000553863	0.488825			0.000553863	0.934273			0.000553863	0.92801
0.000576483	0.974525			0.000516773	0.958697			0.000516773	0.471525			0.000516773	0.929886			0.000516773	0.92324
0.000537878	0.972747			0.000482166	0.955863			0.000482166	0.454293			0.000482166	0.92523			0.000482166	0.918181
0.000501858	0.970847			0.000449877	0.952845			0.000449877	0.43717			0.000449877	0.920291			0.000449877	0.91282
0.00046825	0.96882			0.00041975	0.949631			0.00041975	0.420196			0.00041975	0.915055			0.00041975	0.907143
0.000436893	0.966657			0.000391641	0.94621			0.000391641	0.403408			0.000391641	0.90951			0.000391641	0.901137
0.000407635	0.964349			0.000365414	0.94257			0.000365414	0.386844			0.000365414	0.903641			0.000365414	0.894788
0.000380337	0.961887			0.000340943	0.938701			0.000340943	0.370537			0.000340943	0.897434			0.000340943	0.888081
0.000354867	0.959263			0.000318111	0.934589			0.000318111	0.35452			0.000318111	0.890875			0.000318111	0.881004
0.000331103	0.956466			0.000296808	0.930221			0.000296808	0.338822			0.000296808	0.883951			0.000296808	0.873543
0.00030893	0.953487			0.000276932	0.925585			0.000276932	0.323472			0.000276932	0.876649			0.000276932	0.865685
0.000288242	0.950314			0.000258386	0.920668			0.000258386	0.308492			0.000258386	0.868955			0.000258386	0.857419
0.000268939	0.946937			0.000241083	0.915455			0.000241083	0.293905			0.000241083	0.860858			0.000241083	0.848732
0.000250929	0.943344			0.000224938	0.909932			0.000224938	0.279729			0.000224938	0.852345			0.000224938	0.839616
0.000234125	0.939523			0.000209875	0.904087			0.000209875	0.265979			0.000209875	0.843406			0.000209875	0.83006
0.000218446	0.935462			0.00019582	0.897906			0.00019582	0.252667			0.00019582	0.834031			0.00019582	0.820057
0.000203818	0.931149			0.000182707	0.891373			0.000182707	0.239804			0.000182707	0.824212			0.000182707	0.8096
0.000190169	0.926569			0.000170471	0.884477			0.000170471	0.227397			0.000170471	0.813942			0.000170471	0.798684
0.000177434	0.921711			0.000159056	0.877202			0.000159056	0.21545			0.000159056	0.803215			0.000159056	0.787307
0.000165551	0.91656			0.000148404	0.869538			0.000148404	0.203964			0.000148404	0.792027			0.000148404	0.775468
0.000154465	0.911103			0.000138466	0.86147			0.000138466	0.192941			0.000138466	0.780377			0.000138466	0.763168
0.000144121	0.905326			0.000129193	0.852988			0.000129193	0.182376			0.000129193	0.768265			0.000129193	0.750411
0.00013447	0.899215			0.000120542	0.84408			0.000120542	0.172267			0.000120542	0.755695			0.000120542	0.737203
0.000125464	0.892756			0.000112469	0.834737			0.000112469	0.162607			0.000112469	0.742671			0.000112469	0.723554
0.000117063	0.885935			0.000104938	0.82495			0.000104938	0.153388			0.000104938	0.729201			0.000104938	0.709475
0.000109223	0.87874			9.79101e-05	0.814713			9.79101e-05	0.144601			9.79101e-05	0.715296			9.79101e-05	0.694981
0.000101909	0.871156			9.13534e-05	0.804018			9.13534e-05	0.136237			9.13534e-05	0.700971			9.13534e-05	0.680091
9.50843e-05	0.863173			8.52357e-05	0.792863			8.52357e-05	0.128284			8.52357e-05	0.68624			8.52357e-05	0.664824
8.87168e-05	0.854777			7.95278e-05	0.781247			7.95278e-05	0.12073			7.95278e-05	0.671125			7.95278e-05	0.649204
8.27757e-05	0.845957			7.4202e-05	0.769168			7.4202e-05	0.113563			7.4202e-05	0.655646			7.4202e-05	0.633258
7.72324e-05	0.836704			6.92329e-05	0.756629			6.92329e-05	0.10677			6.92329e-05	0.63983			6.92329e-05	0.617014
7.20604e-05	0.827009			6.45966e-05	0.743637			6.45966e-05	0.100338			6.45966e-05	0.623704			6.45966e-05	0.600505
6.72348e-05	0.816864			6.02708e-05	0.730198			6.02708e-05	0.0942515			6.02708e-05	0.6073			6.02708e-05	0.583764
6.27322e-05	0.806264			5.62346e-05	0.716324			5.62346e-05	0.0884983			5.62346e-05	0.590649			5.62346e-05	0.566828
5.85313e-05	0.795203			5.24688e-05	0.702027			5.24688e-05	0.0830641			5.24688e-05	0.573789			5.24688e-05	0.549734
5.46116e-05	0.783681			4.89551e-05	0.687324			4.89551e-05	0.077935			4.89551e-05	0.556754			4.89551e-05	0.532522
5.09544e-05	0.771696			4.56767e-05	0.672234			4.56767e-05	0.0730975			4.56767e-05	0.539585			4.56767e-05	0.515232
4.75421e-05	0.759251			4.26179e-05	0.656779			4.26179e-05	0.0685378			4.26179e-05	0.522322			4.26179e-05	0.497905
4.43584e-05	0.74635			3.97639e-05	0.640985			3.97639e-05	0.0642429			3.97639e-05	0.505005			3.97639e-05	0.480584
4.13878e-05	0.733001			3.7101e-05	0.624879			3.7101e-05	0.0601997			3.7101e-05	0.487677			3.7101e-05	0.463309
3.86162e-05	0.719214			3.46165e-05	0.608491			3.46165e-05	0.0563957			3.46165e-05	0.470377			3.46165e-05	0.446122
3.60302e-05	0.705001			3.22983e-05	0.591856			3.22983e-05	0.0528185			3.22983e-05	0.453149			3.22983e-05	0.429062
3.36174e-05	0.690378			3.01354e-05	0.575007			3.01354e-05	0.0494563			3.01354e-05	0.436032			3.01354e-05	0.41217
3.13661e-05	0.675364			2.81173e-05	0.557981			2.81173e-05	0.0462977			2.81173e-05	0.419067			2.81173e-05	0.395482
2.92656e-05	0.659981			2.62344e-05	0.540819			2.62344e-05	0.0433316			2.62344e-05	0.40229			2.62344e-05	0.379034
2.73058e-05	0.644252			2.44775e-05	0.523559			2.44775e-05	0.0405475			2.44775e-05	0.385739			2.44775e-05	0.362859
2.54772e-05	0.628205			2.28383e-05	0.506243			2.28383e-05	0.0379352			2.28383e-05	0.369449			2.28383e-05	0.346989
2.37711e-05	0.611871			2.13089e-05	0.488911			2.13089e-05	0.0354849			2.13089e-05	0.35345			2.13089e-05	0.331453
2.21792e-05	0.595281			1.98819e-05	0.471606			1.98819e-05	0.0331874			1.98819e-05	0.337773			1.98819e-05	0.316274
2.06939e-05	0.578471			1.85505e-05	0.45437			1.85505e-05	0.0310339			1.85505e-05	0.322445			1.85505e-05	0.301478
1.93081e-05	0.561476			1.73082e-05	0.437242			1.73082e-05	0.029016			1.73082e-05	0.30749			1.73082e-05	0.287083
1.80151e-05	0.544337			1.61492e-05	0.420262			1.61492e-05	0.0271256			1.61492e-05	0.292928			1.61492e-05	0.273107
1.68087e-05	0.527091			1.50677e-05	0.403469			1.50677e-05	0.0253551			1.50677e-05	0.278778			1.50677e-05	0.259564
1.56831e-05	0.50978			1.40587e-05	0.386899			1.40587e-05	0.0236974			1.40587e-05	0.265056			1.40587e-05	0.246464
1.46328e-05	0.492446			1.31172e-05	0.370587			1.31172e-05	0.0221456			1.31172e-05	0.251774			1.31172e-05	0.233817
1.36529e-05	0.47513			1.22388e-05	0.354565			1.22388e-05	0.0206933			1.22388e-05	0.23894			1.22388e-05	0.221628
1.27386e-05	0.457874			1.14192e-05	0.338863			1.14192e-05	0.0193343			1.14192e-05	0.226563			1.14192e-05	0.2099
1.18855e-05	0.440718			1.06545e-05	0.323508			1.06545e-05	0.0180629			1.06545e-05	0.214646			1.06545e-05	0.198635
1.10896e-05	0.423703			9.94097e-06	0.308524			9.94097e-06	0.0168737			9.94097e-06	0.203191			9.94097e-06	0.187831
1.0347e-05	0.406867			9.27525e-06	0.293933			9.27525e-06	0.0157615			9.27525e-06	0.192199			9.27525e-06	0.177484
9.65406e-06	0.390247			8.65412e-06	0.279753			8.65412e-06	0.0147216			8.65412e-06	0.181665			8.65412e-06	0.167589
9.00755e-06	0.373878			8.07458e-06	0.265999			8.07458e-06	0.0137493			8.07458e-06	0.171586			8.07458e-06	0.15814
8.40434e-06	0.357793			7.53385e-06	0.252684			7.53385e-06	0.0128403			7.53385e-06	0.161955			7.53385e-06	0.149129
7.84153e-06	0.342021			7.02933e-06	0.239818			7.02933e-06	0.0119908			7.02933e-06	0.152766			7.02933e-06	0.140545
7.31641e-06	0.326592			6.55859e-06	0.227408			6.55859e-06	0.0111968			6.55859e-06	0.144008			6.55859e-06	0.132379
6.82645e-06	0.311529			6.11938e-06	0.215458			6.11938e-06	0.0104548			6.11938e-06	0.135672			6.11938e-06	0.124618
6.3693e-06	0.296855			5.70959e-06	0.20397			5.70959e-06	0.00976151			5.70959e-06	0.127747			5.70959e-06	0.117251
5.94277e-06	0.282589			5.32723e-06	0.192945			5.32723e-06	0.00911376			5.32723e-06	0.12022			5.32723e-06	0.110264
5.5448e-06	0.268746			4.97048e-06	0.182378			4.97048e-06	0.00850864			4.97048e-06	0.113079			4.97048e-06	0.103645
5.17348e-06	0.25534			4.63763e-06	0.172267			4.63763e-06	0.00794336			4.63763e-06	0.106311			4.63763e-06	0.0973798
4.82703e-06	0.242382			4.32706e-06	0.162606			4.32706e-06	0.00741536			4.32706e-06	0.0999025			4.32706e-06	0.0914547
4.50378e-06	0.229878			4.03729e-06	0.153385			4.03729e-06	0.00692222			4.03729e-06	0.0938398			4.03729e-06	0.0858558
4.20217e-06	0.217833			3.76692e-06	0.144598			3.76692e-06	0.00646165			3.76692e-06	0.088109			3.76692e-06	0.0805693
3.92077e-06	0.206251			3.51466e-06	0.136232			3.51466e-06	0.00603154			3.51466e-06	0.0826963			3.51466e-06	0.0755814
3.6582e-06	0.195132			3.2793e-06	0.128279			3.2793e-06	0.0056299			3.2793e-06	0.0775878			3.2793e-06	0.0708786
3.41322e-06	0.184472			3.05969e-06	0.120724			3.05969e-06	0.00525487			3.05969e-06	0.0727699			3.05969e-06	0.0664473
3.18465e-06	0.174269			2.85479e-06	0.113557			2.85479e-06	0.00490469			2.85479e-06	0.068229			2.85479e-06	0.0622745
2.97138e-06	0.164517			2.66362e-06	0.106764			2.66362e-06	0.00457774			2.66362e-06	0.063952			2.66362e-06	0.0583473
2.7724e-06	0.155207			2.48524e-06	0.100331			2.48524e-06	0.00427249			2.48524e-06	0.0599258			2.48524e-06	0.0546534
2.58674e-06	0.146333			2.31881e-06	0.0942446			2.31881e-06	0.00398752			2.31881e-06	0.0561379			2.31881e-06	0.0511807
2.41351e-06	0.137883			2.16353e-06	0.0884913			2.16353e-06	0.00372148			2.16353e-06	0.052576			2.16353e-06	0.0479174
2.25189e-06	0.129847			2.01864e-06	0.083057			2.01864e-06	0.00347313			2.01864e-06	0.0492284			2.01864e-06	0.0448524
2.10109e-06	0.122213			1.88346e-06	0.0779279			1.88346e-06	0.0032413			1.88346e-06	0.0460836			1.88346e-06	0.0419747
1.96038e-06	0.114968			1.75733e-06	0.0730904			1.75733e-06	0.00302489			1.75733e-06	0.0431305			1.75733e-06	0.0392742
1.8291e-06	0.1081			1.63965e-06	0.0685309			1.63965e-06	0.0028229			1.63965e-06	0.0403587			1.63965e-06	0.0367407
1.70661e-06	0.101596			1.52985e-06	0.0642361			1.52985e-06	0.00263435			1.52985e-06	0.037758			1.52985e-06	0.0343648
1.59233e-06	0.0954404			1.4274e-06	0.0601931			1.4274e-06	0.00245837			1.4274e-06	0.0353187			1.4274e-06	0.0321374
1.48569e-06	0.0896211			1.33181e-06	0.0563892			1.33181e-06	0.00229412			1.33181e-06	0.0330316			1.33181e-06	0.0300499
1.3862e-06	0.0841236			1.24262e-06	0.0528122			1.24262e-06	0.00214082			1.24262e-06	0.0308878			1.24262e-06	0.028094
1.29337e-06	0.0789342			1.15941e-06	0.0494502			1.15941e-06	0.00199774			1.15941e-06	0.0288791			1.15941e-06	0.026262
1.20676e-06	0.074039			1.08176e-06	0.0462918			1.08176e-06	0.00186421			1.08176e-06	0.0269973			1.08176e-06	0.0245465
1.12594e-06	0.0694246			1.00932e-06	0.043326			1.00932e-06	0.00173959			1.00932e-06	0.025235			1.00932e-06	0.0229404
1.05054e-06	0.0650775			9.41731e-07	0.0405421			9.41731e-07	0.00162328			9.41731e-07	0.0235849			9.41731e-07	0.021437
9.80191e-07	0.0609849			8.78666e-07	0.03793			8.78666e-07	0.00151474			8.78666e-07	0.0220403			8.78666e-07	0.0200302
9.14551e-07	0.0571339			8.19824e-07	0.0354799			8.19824e-07	0.00141344			8.19824e-07	0.0205947			8.19824e-07	0.0187139
8.53306e-07	0.0535122			7.64923e-07	0.0331827			7.64923e-07	0.00131891			7.64923e-07	0.019242			7.64923e-07	0.0174826
7.96163e-07	0.050108			7.13698e-07	0.0310295			7.13698e-07	0.0012307			7.13698e-07	0.0179766			7.13698e-07	0.016331
7.42846e-07	0.0469096			6.65904e-07	0.0290117			6.65904e-07	0.00114838			6.65904e-07	0.016793			6.65904e-07	0.015254
6.931e-07	0.0439059			6.21311e-07	0.0271215			6.21311e-07	0.00107156			6.21311e-07	0.015686			6.21311e-07	0.014247
6.46685e-07	0.0410863			5.79703e-07	0.0253513			5.79703e-07	0.00099987			5.79703e-07	0.014651			5.79703e-07	0.0133056
6.03378e-07	0.0384404			5.40882e-07	0.0236938			5.40882e-07	0.000932974			5.40882e-07	0.0136832			5.40882e-07	0.0124257
5.62972e-07	0.0359586			5.04661e-07	0.0221422			5.04661e-07	0.00087055			5.04661e-07	0.0127786			5.04661e-07	0.0116032
5.25271e-07	0.0336314			4.70865e-07	0.02069			4.70865e-07	0.000812299			4.70865e-07	0.0119331			4.70865e-07	0.0108346
4.90096e-07	0.03145			4.39333e-07	0.0193312			4.39333e-07	0.000757943			4.39333e-07	0.0111429			4.39333e-07	0.0101164
4.57275e-07	0.0294057			4.09912e-07	0.01806			4.09912e-07	0.000707222			4.09912e-07	0.0104044			4.09912e-07	0.00944529
4.26653e-07	0.0274905			3.82462e-07	0.016871			3.82462e-07	0.000659892			3.82462e-07	0.00971443			3.82462e-07	0.00881834
3.98081e-07	0.0256968			3.56849e-07	0.015759			3.56849e-07	0.000615729			3.56849e-07	0.00906978			3.56849e-07	0.00823266
3.71423e-07	0.0240172			3.32952e-07	0.0147191			3.32952e-07	0.000574519			3.32952e-07	0.00846754			3.32952e-07	0.00768558
3.4655e-07	0.0224449			3.10655e-07	0.013747			3.10655e-07	0.000536066			3.10655e-07	0.00790497			3.10655e-07	0.00717459
3.23343e-07	0.0209733			2.89852e-07	0.0128382			2.89852e-07	0.000500185			2.89852e-07	0.00737951			2.89852e-07	0.00669735
3.01689e-07	0.0195963			2.70441e-07	0.0119888			2.70441e-07	0.000466705			2.70441e-07	0.00688872			2.70441e-07	0.00625165
2.81486e-07	0.018308			2.52331e-07	0.0111949			2.52331e-07	0.000435464			2.52331e-07	0.00643037			2.52331e-07	0.00583544
2.62636e-07	0.0171029			2.35433e-07	0.010453			2.35433e-07	0.000406315			2.35433e-07	0.00600233			2.35433e-07	0.00544678
2.45048e-07	0.0159758			2.19666e-07	0.00975984			2.19666e-07	0.000379115			2.19666e-07	0.00560262			2.19666e-07	0.00508388
2.28638e-07	0.0149219			2.04956e-07	0.0091122			2.04956e-07	0.000353736			2.04956e-07	0.00522939			2.04956e-07	0.00474504
2.13327e-07	0.0139365			1.91231e-07	0.00850717			1.91231e-07	0.000330055			1.91231e-07	0.00488091			1.91231e-07	0.00442869
1.99041e-07	0.0130154			1.78425e-07	0.00794199			1.78425e-07	0.000307959			1.78425e-07	0.00455553			1.78425e-07	0.00413334
1.85712e-07	0.0121543			1.66476e-07	0.00741408			1.66476e-07	0.000287342			1.66476e-07	0.00425176			1.66476e-07	0.00385761
1.73275e-07	0.0113496			1.55328e-07	0.00692101			1.55328e-07	0.000268105			1.55328e-07	0.00396816			1.55328e-07	0.0036002
1.61671e-07	0.0105976			1.44926e-07	0.00646052			1.44926e-07	0.000250155			1.44926e-07	0.00370341			1.44926e-07	0.00335992
1.50845e-07	0.00989494			1.35221e-07	0.00603049			1.35221e-07	0.000233407			1.35221e-07	0.00345626			1.35221e-07	0.00313562
1.40743e-07	0.00923841			1.26165e-07	0.00562891			1.26165e-07	0.00021778			1.26165e-07	0.00322555			1.26165e-07	0.00292625
1.31318e-07	0.00862507			1.17716e-07	0.00525394			1.17716e-07	0.000203199			1.17716e-07	0.00301019			1.17716e-07	0.00273082
1.22524e-07	0.00805212			1.09833e-07	0.00490382			1.09833e-07	0.000189594			1.09833e-07	0.00280918			1.09833e-07	0.00254841
1.14319e-07	0.00751694			1.02478e-07	0.00457693			1.02478e-07	0.000176899			1.02478e-07	0.00262155			1.02478e-07	0.00237816
1.06663e-07	0.00701708			9.56154e-08	0.00427174			9.56154e-08	0.000165055			9.56154e-08	0.00244642			9.56154e-08	0.00221925
9.95203e-08	0.00655024			8.92123e-08	0.00398681			8.92123e-08	0.000154003			8.92123e-08	0.00228296			8.92123e-08	0.00207095
9.28558e-08	0.00611427			8.3238e-08	0.00372082			8.3238e-08	0.000143692			8.3238e-08	0.00213041			8.3238e-08	0.00193253
8.66375e-08	0.00570715			7.76638e-08	0.00347251			7.76638e-08	0.00013407			7.76638e-08	0.00198802			7.76638e-08	0.00180335
8.08356e-08	0.00532699			7.24629e-08	0.00324072			7.24629e-08	0.000125093			7.24629e-08	0.00185514			7.24629e-08	0.00168278
7.54223e-08	0.00497203			6.76103e-08	0.00302435			6.76103e-08	0.000116717			6.76103e-08	0.00173112			6.76103e-08	0.00157027
7.03715e-08	0.00464061			6.30826e-08	0.00282239			6.30826e-08	0.000108902			6.30826e-08	0.00161538			6.30826e-08	0.00146527
6.56589e-08	0.00433118			5.88582e-08	0.00263388			5.88582e-08	0.00010161			5.88582e-08	0.00150736			5.88582e-08	0.00136728
6.1262e-08	0.00404231			5.49166e-08	0.00245793			5.49166e-08	9.48057e-05			5.49166e-08	0.00140656			5.49166e-08	0.00127583
5.71594e-08	0.00377263			5.1239e-08	0.00229371			5.1239e-08	8.84575e-05			5.1239e-08	0.00131249			5.1239e-08	0.00119049
5.33316e-08	0.00352087			4.78077e-08	0.00214043			4.78077e-08	8.25342e-05			4.78077e-08	0.00122471			4.78077e-08	0.00111086
4.97602e-08	0.00328586			4.46062e-08	0.00199738			4.46062e-08	7.70076e-05			4.46062e-08	0.00114279			4.46062e-08	0.00103655
4.64279e-08	0.00306649			4.1619e-08	0.00186387			4.1619e-08	7.1851e-05			4.1619e-08	0.00106634			4.1619e-08	0.000967198
4.33187e-08	0.00286173			3.88319e-08	0.00173927			3.88319e-08	6.70396e-05			3.88319e-08	0.000995			3.88319e-08	0.000902486
4.04178e-08	0.0026706			3.62315e-08	0.00162299			3.62315e-08	6.25505e-05			3.62315e-08	0.000928429			3.62315e-08	0.0008421
3.77112e-08	0.0024922			3.38051e-08	0.00151446			3.38051e-08	5.83619e-05			3.38051e-08	0.000866309			3.38051e-08	0.000785752
3.51858e-08	0.00232569			3.15413e-08	0.00141319			3.15413e-08	5.44538e-05			3.15413e-08	0.000808342			3.15413e-08	0.000733171
3.28295e-08	0.00217028			2.94291e-08	0.00131868			2.94291e-08	5.08074e-05			2.94291e-08	0.00075425			2.94291e-08	0.000684106
3.0631e-08	0.00202524			2.74583e-08	0.00123048			2.74583e-08	4.74051e-05			2.74583e-08	0.000703776			2.74583e-08	0.000638323
2.85797e-08	0.00188987			2.56195e-08	0.00114817			2.56195e-08	4.42307e-05			2.56195e-08	0.000656677			2.56195e-08	0.000595602

## Sheet: Figure 5a
	WT PHD2								A228S PHD2								P317R PHD2
	HIF1a P564				HIF1a P402				HIF1a P564				HIF1a P402				HIF1a P564				HIF1a P402
Time (h)	Rep 1	Rep 2	Average	Std. Dev.	Rep 1	Rep 2	Average	Std. Dev.	Rep 1	Rep 2	Average	Std. Dev.	Rep 1	Rep 2	Average	Std. Dev.	Rep 1	Rep 2	Average	Std. Dev.	Rep 1	Rep 2	Average	Std. Dev.
0	-0.502726	-2.20734	-1.35503	1.20534	0.644979	-1.24849	-0.301757	1.33889	-1.24332	-2.11002	-1.67667	0.612852	1.48816	1.07074	1.27945	0.295159	0.0521463	-0.967311	-0.457583	0.720865	1.2709	1.44039	1.35565	0.119846
0.167222	42.452	46.1046	44.2783	2.58277	1.43616	1.74895	1.59255	0.221177	53.6803	33.311	43.4956	14.4033	1.18174	0.515871	0.848805	0.470841	41.0271	39.7701	40.3986	0.888827	-0.245309	1.66754	0.711113	1.35259
0.334444	69.2398	75.7634	72.5016	4.61289	2.00108	1.93661	1.96885	0.0455871	78.4688	54.5752	66.522	16.8953	2.43581	0.327494	1.38165	1.49081	59.231	58.025	58.628	0.85281	1.15414	0.31067	0.732404	0.596423
0.501667	80.0951	86.5064	83.3007	4.53351	1.11257	2.43146	1.77201	0.932596	87.7301	62.413	75.0716	17.9018	1.21554	0.407675	0.811608	0.571247	64.191	64.8909	64.5409	0.494973	0.751925	0.100197	0.426061	0.460842
0.668889	82.4816	89.8678	86.1747	5.2228	2.10219	2.48883	2.29551	0.273395	89.225	67.2308	78.2279	15.5522	0.278842	2.29222	1.28553	1.42367	70.091	70.2969	70.194	0.14562	0.58783	0.350213	0.469021	0.168021
0.836111	84.2402	91.5748	87.9075	5.18637	1.5706	2.20359	1.8871	0.447588	90.3974	73.1364	81.7669	12.2054	1.90934	1.35834	1.63384	0.38962	71.2093	69.1537	70.1815	1.4535	0.620634	0.306341	0.463488	0.222239
1.00333	87.3372	93.6181	90.4776	4.44127	2.58289	2.99554	2.78922	0.291792	89.1962	76.551	82.8736	8.94152	1.88416	1.66179	1.77297	0.157237	75.7958	71.1107	73.4532	3.31286	0.698825	0.403897	0.551361	0.208546
1.83722	86.5176	96.3573	91.4374	6.95767	5.15336	6.34365	5.7485	0.841662	90.8185	81.6065	86.2125	6.51387	3.56639	3.93175	3.74907	0.258347	79.461	70.1244	74.7927	6.60194	0.180094	1.26499	0.722542	0.767137
2.67111	87.9416	95.5067	91.7241	5.34932	9.4879	10.6882	10.0881	0.848756	93.21	85.8239	89.517	5.22271	3.28761	5.94545	4.61653	1.87938	84.1824	69.0812	76.6318	10.6782	0.664426	0.255098	0.459762	0.289438
3.505	91.1378	95.7391	93.4384	3.25366	14.4601	14.6857	14.5729	0.15949	91.4314	88.7523	90.0919	1.89441	2.17255	9.20219	5.68737	4.9707	89.5064	71.4886	80.4975	12.7405	0.964693	-0.133199	0.415747	0.776327
4.33889	91.2514	95.5534	93.4024	3.04194	14.8063	21.8438	18.3251	4.97626	91.2141	88.3128	89.7634	2.05157	5.74086	11.6779	8.7094	4.19816	88.3182	74.3987	81.3584	9.84253	1.20899	1.16091	1.18495	0.0339972
5.17278	90.8364	94.8372	92.8368	2.82896	19.7364	25.1796	22.458	3.84888	93.5583	91.1122	92.3353	1.7296	11.7453	14.4667	13.106	1.92435	91.2489	76.5682	83.9085	10.3809	1.81541	-0.49988	0.657762	1.63715
6.00667	92.1329	97.044	94.5885	3.47269	20.1506	31.0126	25.5816	7.68056	92.6885	93.7779	93.2332	0.770382	19.5785	16.8835	18.231	1.90569	90.8989	82.4657	86.6823	5.96316	-0.538844	0.247754	-0.145545	0.556209
6.84056	92.0095	95.0467	93.5281	2.14759	23.955	34.8298	29.3924	7.68962	94.579	97.5737	96.0763	2.11761	26.5445	19.1349	22.8397	5.23932	88.4173	84.007	86.2121	3.11852	0.439406	1.21802	0.828714	0.550565
7.67444	92.7875	95.7237	94.2556	2.07618	28.8649	35.2813	32.0731	4.53707	94.9486	96.6203	95.7845	1.18204	35.4315	25.2001	30.3158	7.2347	90.2431	86.0418	88.1425	2.97078	-0.832852	0.881724	0.0244361	1.21239
8.50833	94.5348	96.7805	95.6576	1.58796	34.0077	37.0438	35.5258	2.14687	94.7856	96.6175	95.7016	1.29536	38.3171	33.3745	35.8458	3.49499	90.5612	85.7259	88.1436	3.4191	0.426487	0.798973	0.61273	0.263387
9.34222	95.2538	97.2102	96.232	1.38334	34.6318	40.3881	37.51	4.07029	95.9094	95.816	95.8627	0.0660535	36.3315	35.8836	36.1075	0.316731	89.7107	90.2145	89.9626	0.356201	1.39413	0.740081	1.06711	0.462485
10.1761	93.8111	97.3472	95.5791	2.50035	39.6739	45.676	42.675	4.24418	95.7135	97.4326	96.5731	1.21561	35.9932	40.8996	38.4464	3.46936	93.1207	91.3011	92.2109	1.28665	-0.350331	0.896775	0.273222	0.881837
11.01	95.5099	94.8413	95.1756	0.472789	42.5026	50.8624	46.6825	5.91128	97.5608	96.0367	96.7988	1.07773	41.5102	46.7568	44.1335	3.70991	91.9312	90.8016	91.3664	0.79873	1.80439	0.182988	0.993689	1.1465
11.8439	96.9981	96.6299	96.814	0.260363	46.7706	55.5412	51.1559	6.20175	96.8428	96.8752	96.859	0.0229419	47.3638	53.3795	50.3717	4.2537	92.4339	93.1844	92.8092	0.530711	0.432999	1.523	0.977999	0.770746
12.6778	96.7297	96.7133	96.7215	0.0115787	47.099	59.0017	53.0503	8.41647	97.4281	96.1759	96.802	0.885451	53.2564	57.3347	55.2956	2.88373	96.2118	94.5899	95.4008	1.14686	2.0025	0.833321	1.41791	0.826736
13.5117	96.2184	97.5079	96.8631	0.911799	53.4244	61.5313	57.4778	5.73243	95.4522	97.048	96.2501	1.12837	56.8795	61.2996	59.0896	3.12547	95.2153	94.6297	94.9225	0.414101	0.94586	1.7266	1.33623	0.552064
14.3456	97.7488	95.8586	96.8037	1.33655	54.3233	68.6788	61.501	10.1509	94.901	96.4215	95.6613	1.07515	62.4387	64.7862	63.6125	1.65997	95.962	93.8012	94.8816	1.52796	0.319938	1.52057	0.920252	0.848973
15.1794	98.3275	96.4029	97.3652	1.3609	60.9022	69.4881	65.1952	6.07117	95.7588	96.3561	96.0575	0.422336	65.7469	68.2668	67.0068	1.78187	95.0446	94.6478	94.8462	0.280556	1.61006	0.719419	1.16474	0.629779
16.0133	98.1748	96.3547	97.2647	1.28705	62.9064	73.7098	68.3081	7.63914	95.246	95.6469	95.4465	0.283504	66.6847	72.083	69.3838	3.81716	91.0754	95.4485	93.262	3.09222	0.794197	1.34375	1.06897	0.388595
16.8472	98.2319	95.8423	97.0371	1.68973	68.2511	76.4002	72.3256	5.76224	95.1593	96.3171	95.7382	0.818636	70.3611	76.0512	73.2061	4.02351	95.0238	97.2251	96.1244	1.55653	0.749983	0.830388	0.790185	0.0568551
17.6811	97.1238	96.0369	96.5803	0.768539	66.4854	81.0657	73.7756	10.3098	97.0352	95.6194	96.3273	1.00113	76.7382	80.7034	78.7208	2.80381	95.2401	95.4144	95.3273	0.123237	1.3557	1.49211	1.4239	0.0964563
18.515	97.6882	95.4886	96.5884	1.55536	69.2536	82.888	76.0708	9.64095	95.9586	97.9696	96.9641	1.42201	78.4667	82.2902	80.3784	2.70368	96.0678	95.6702	95.869	0.281107	1.17732	1.13061	1.15396	0.0330292
19.3489	97.3811	97.6283	97.5047	0.174769	69.9344	85.3064	77.6204	10.8696	95.5188	96.2553	95.8871	0.520769	80.626	82.9783	81.8021	1.66336	95.092	96.7164	95.9042	1.14864	1.72529	1.44708	1.58618	0.19673
20.1828	98.6777	96.861	97.7693	1.28457	73.8447	86.7374	80.291	9.1165	97.231	96.4744	96.8527	0.534984	83.8725	85.3249	84.5987	1.02701	94.9662	96.2995	95.6329	0.942807	0.774548	0.900679	0.837613	0.089188

## Sheet: Figure S1
PHD2 (181-426) Superdex 200 Increase Elution Profile
WT		G206C		A228S		P317R		W334R		F366L		R371H		H374R
Elution Volume (ml)	Absorbance at 280 nm (mAU)	Elution Volume (ml)	Absorbance at 280 nm (mAU)	Elution Volume (ml)	Absorbance at 280 nm (mAU)	Elution Volume (ml)	Absorbance at 280 nm (mAU)	Elution Volume (ml)	Absorbance at 280 nm (mAU)	Elution Volume (ml)	Absorbance at 280 nm (mAU)	Elution Volume (ml)	Absorbance at 280 nm (mAU)	Elution Volume (ml)	Absorbance at 280 nm (mAU)
0	2.93	0	0.25	0	0.05	0	-0.55	0	0.78	0	10.96	0	0.01	0	-4.21
0.02	0.47	0.03	0.02	0.02	-0.01	0.03	132.07	0.03	-0.03	0.03	0.05	0.03	0.21	0.03	-0.03
0.04	2.69	0.06	0.01	0.05	0.01	0.06	264.26	0.06	0.21	0.05	0.33	0.06	0.1	0.06	0.59
0.06	3.45	0.1	-0.02	0.07	0.07	0.1	138.45	0.1	0.24	0.08	0.46	0.1	-0.28	0.1	0.87
0.09	3.02	0.13	0.14	0.1	0.11	0.13	5.61	0.13	0.05	0.11	0.16	0.13	-0.4	0.13	0.18
0.11	1.04	0.16	0.39	0.12	0.06	0.16	-0.34	0.16	0.03	0.13	-0.06	0.16	-0.34	0.16	-0.15
0.13	0.42	0.19	0.23	0.14	0	0.19	-0.33	0.19	0.04	0.16	-0.12	0.19	-0.16	0.19	-0.2
0.15	0.28	0.22	0	0.17	-0.02	0.22	-0.29	0.22	0.21	0.19	-0.1	0.22	0.15	0.22	-0.04
0.17	0.13	0.26	-0.07	0.19	-0.02	0.26	0.32	0.26	0.87	0.21	-0.01	0.26	0.3	0.26	0.39
0.19	-0.01	0.29	0	0.22	0.08	0.29	1.35	0.29	1.65	0.24	0.12	0.29	0.25	0.29	0.72
0.21	-0.04	0.32	0.49	0.24	0.27	0.32	1.77	0.32	2.05	0.27	0.22	0.32	0.18	0.32	0.82
0.23	0.24	0.35	1.15	0.26	0.44	0.35	1.72	0.35	2.15	0.29	0.22	0.35	0.13	0.35	0.8
0.26	0.86	0.38	1.4	0.29	0.45	0.38	1.56	0.38	2.04	0.32	0.19	0.38	0.1	0.38	0.69
0.28	1.53	0.42	1.48	0.31	0.39	0.42	1.33	0.42	1.87	0.35	0.17	0.42	0.07	0.42	0.58
0.3	1.91	0.45	1.42	0.34	0.33	0.45	1.11	0.45	1.73	0.37	0.16	0.45	0.04	0.45	0.49
0.32	1.97	0.48	1.29	0.36	0.29	0.48	0.92	0.48	1.61	0.4	0.14	0.48	0.02	0.48	0.42
0.34	1.9	0.51	1.17	0.38	0.25	0.51	0.77	0.51	1.49	0.43	0.13	0.51	0.01	0.51	0.35
0.36	1.77	0.54	1.07	0.41	0.23	0.54	0.64	0.54	1.37	0.45	0.11	0.54	-0.02	0.54	0.3
0.38	1.59	0.57	0.99	0.43	0.21	0.58	0.51	0.57	1.24	0.48	0.1	0.57	-0.03	0.58	0.26
0.4	1.37	0.61	0.9	0.45	0.19	0.61	0.4	0.61	1.13	0.51	0.09	0.61	-0.05	0.61	0.22
0.43	1.19	0.64	0.81	0.48	0.17	0.64	0.31	0.64	1.01	0.53	0.08	0.64	-0.06	0.64	0.19
0.45	1.02	0.67	0.73	0.5	0.16	0.67	0.24	0.67	0.92	0.56	0.07	0.67	-0.08	0.67	0.15
0.47	0.87	0.7	0.65	0.53	0.15	0.7	0.18	0.7	0.84	0.59	0.06	0.7	-0.09	0.7	0.13
0.49	0.74	0.73	0.59	0.55	0.13	0.73	0.11	0.73	0.76	0.61	0.05	0.73	-0.1	0.73	0.11
0.51	0.63	0.77	0.53	0.57	0.12	0.77	0.06	0.77	0.69	0.64	0.04	0.77	-0.11	0.77	0.1
0.53	0.53	0.8	0.49	0.6	0.11	0.8	0.02	0.8	0.63	0.67	0.03	0.8	-0.12	0.8	0.08
0.55	0.44	0.83	0.44	0.62	0.1	0.83	-0.02	0.83	0.58	0.69	0.03	0.83	-0.12	0.83	0.07
0.57	0.37	0.86	0.4	0.65	0.08	0.86	-0.05	0.86	0.53	0.72	0.02	0.86	-0.13	0.86	0.06
0.6	0.3	0.89	0.37	0.67	0.07	0.89	-0.07	0.89	0.49	0.74	0.01	0.89	-0.14	0.89	0.05
0.62	0.24	0.93	0.34	0.69	0.06	0.93	-0.1	0.93	0.45	0.77	0.01	0.93	-0.14	0.93	0.05
0.64	0.18	0.96	0.3	0.72	0.05	0.96	-0.12	0.96	0.41	0.8	0.01	0.96	-0.15	0.96	0.04
0.66	0.13	0.99	0.28	0.74	0.05	0.99	-0.14	0.99	0.38	0.82	0	0.99	-0.15	0.99	0.03
0.68	0.1	1.02	0.26	0.77	0.05	1.02	-0.15	1.02	0.35	0.85	0	1.02	-0.16	1.02	0.03
0.7	0.06	1.05	0.23	0.79	0.04	1.05	-0.15	1.05	0.32	0.88	-0.01	1.05	-0.16	1.05	0.02
0.72	0.03	1.09	0.21	0.81	0.04	1.09	-0.16	1.09	0.3	0.9	-0.01	1.09	-0.17	1.09	0.02
0.74	-0.01	1.12	0.19	0.84	0.03	1.12	-0.18	1.12	0.28	0.93	-0.01	1.12	-0.17	1.12	0.01
0.77	-0.04	1.15	0.18	0.86	0.03	1.15	-0.2	1.15	0.26	0.96	-0.02	1.15	-0.17	1.15	0.01
0.79	-0.06	1.18	0.16	0.89	0.02	1.18	-0.21	1.18	0.24	0.98	-0.02	1.18	-0.18	1.18	0
0.81	-0.09	1.21	0.15	0.91	0.02	1.21	-0.22	1.21	0.23	1.01	-0.02	1.21	-0.18	1.21	0
0.83	-0.11	1.25	0.14	0.93	0.01	1.25	-0.23	1.25	0.22	1.04	-0.02	1.25	-0.18	1.25	0
0.85	-0.12	1.28	0.13	0.96	0	1.28	-0.24	1.28	0.2	1.06	-0.03	1.28	-0.18	1.28	0
0.87	-0.14	1.31	0.11	0.98	0	1.31	-0.24	1.31	0.19	1.09	-0.03	1.31	-0.19	1.31	0
0.89	-0.16	1.34	0.11	1.01	0	1.34	-0.25	1.34	0.18	1.12	-0.03	1.34	-0.18	1.34	-0.01
0.91	-0.18	1.37	0.1	1.03	-0.01	1.37	-0.25	1.37	0.16	1.14	-0.03	1.37	-0.16	1.37	-0.01
0.94	-0.19	1.41	0.09	1.05	0	1.41	-0.26	1.41	0.15	1.17	-0.03	1.41	-0.18	1.41	-0.01
[truncated: 905 more rows]

## Sheet: Figure S2
	Rep	Kd (uM)	ka (1/Ms)	ka error	kd (1/s)	kd error
[truncated: 12 more rows]

[truncated: 1 more sheets: Figure S3]
