# Supplementary material for: Erythrocytosis-inducing PHD2 mutations implicate biological role for N-terminal prolyl-hydroxylation in HIF1α oxygen-dependent degradation domain
Source: eLife. 2025 Oct 20;14:RP107121. doi: 10.7554/eLife.107121 (PMC12537007; doi:10.7554/eLife.107121)
Supplement: Supplementary file 1. [file elife-107121-supp1.xlsx]

## Sheet: Fig 1
Variant Characteristics						Clinical Characteristics				EPO and Rb Profile		Age of Disease Onset
Report Designation	Amino acid Mutation	AA Mut	DNA Mutation	Exon	Mutation Type	Family History	Erythrocytosis	PPGL	Other manifestations	EPO (mU/mL)	Hb (g/dL)	Age of Erythrocytosis diagnosis	Age of PPGL Diagnosis	Sex	Publication	Date of Publication
	NA	NA	*-410G>T	5'UTR		NA	Y	N	hypereosinophilic	17	NA	73		M	Delamare M, Le Roy A, Pacault M, Schmitt L, Garrec C, Maaziz N, Myllykoski M, Rimbert A, Karaghiannis V, Aral B, Catherwood M, Airaud F, Mansour-Hendili L, Hoogewijs D, Peroni E, Idriss S, Lesieur V, Caillaud A, Si-Tayeb K, Chariau C, Gaignerie A, Rab M, Haferlach T, Meggendorfer M, Bézieau S, Benetti A, Casadevall N, Hirsch P, Rose C, Wemeau M, Galacteros F, Cassinat B, Bellosillo B, Bento C, Va…	2023
	Asp4Glu	D4E	12C>A	1	missense	adaptation	N	N		NA	NA	NA		NA	Xiang, K., Ouzhuluobu, Peng, Y., Yang, Z., Zhang, X., Cui, C., Zhang, H., Li, M., Zhang, Y., Bianba, Gonggalanzi, Basang, Ciwangsangbu, Wu, T., Chen, H., Shi, H., Qi, X., and Su, B. (2013) Identification of a Tibetan-specific mutation in the hypoxic gene EGLN1 and its contribution to high-altitude adaptation. Mol Biol Evol 30, 1889–98.	2013
	Arg35H	R35H	104G>A	1	missense	NA	Y	N		NA	17.1	75		M	Delamare M, Le Roy A, Pacault M, Schmitt L, Garrec C, Maaziz N, Myllykoski M, Rimbert A, Karaghiannis V, Aral B, Catherwood M, Airaud F, Mansour-Hendili L, Hoogewijs D, Peroni E, Idriss S, Lesieur V, Caillaud A, Si-Tayeb K, Chariau C, Gaignerie A, Rab M, Haferlach T, Meggendorfer M, Bézieau S, Benetti A, Casadevall N, Hirsch P, Rose C, Wemeau M, Galacteros F, Cassinat B, Bellosillo B, Bento C, Va…	2023
	Ser38Gly	S38G	112A>G	1	missense	NA	Y	N		5	17.6	NA		NA	Oliveira, J. L., Coon, L. M., Frederick, L. A., Hein, M., Swanson, K. C., Savedra, M. E., Porter, T. R., Patnaik, M. M., Tefferi, A., Pardanani, A., Grebe, S. K., Viswanatha, D. S., and Hoyer, J. D. (2018) Genotype–phenotype correlation of hereditary erythrocytosis mutations, a single center experience. American Journal of Hematology 93, 1029–1041.	2018
	Tyr41Cys	Y41C	122A>G	1	missense	N	Y	N	Headaches	9	19.2	18		M	Oliveira, J. L., Coon, L. M., Frederick, L. A., Hein, M., Swanson, K. C., Savedra, M. E., Porter, T. R., Patnaik, M. M., Tefferi, A., Pardanani, A., Grebe, S. K., Viswanatha, D. S., and Hoyer, J. D. (2018) Genotype–phenotype correlation of hereditary erythrocytosis mutations, a single center experience. American Journal of Hematology 93, 1029–1041.	2018
	Tyr41Ser	Y41S	122A>C	1	missense	N	Y	N		4.8	20.2	32		M	Ma, Q., Hu, R., Hui, W. et al. Two Novel Genetic Variants Involved in the Oxygen Sensing Pathway in JAK2-unmutated Erythrocytosis. Biochem Genet (2024). https://doi.org/10.1007/s10528-024-10752-2	2024
	Tyr41del	Y41del	122_124delACT	1	deletion	NA	Y	N	cardiac event	7.6	20.7	80		M	Jalowiec, K. A., Vrotniakaite-Bajerciene, K., Capraru, A., Wojtovicova, T., Joncourt, R., Rovó, A., and Porret, N. A. (2021) NGS Evaluation of a Bernese Cohort of Unexplained Erythrocytosis Patients. Genes (Basel) 12, 1951.	2021
	Cys42Arg	C42R	124T>C	1	missense	Y	Y	N	abdominal pain, fatigue	6	18	14		F	Sinnema, M., Song, D., Guan, W., Janssen, J. W. H., van Wijk, R., Navalsky, B. E., Peng, K., Donker, A. E., Stegmann, A. P. A., and Lee, F. S. (2018) Loss-of-function zinc finger mutation in the EGLN1 gene associated with erythrocytosis. Blood 132, 1455–1458.	2018
	Cys42Arg	C42R	124T>C	1	missense	Y	Y	N		6.3	17.9	NA		M	Sinnema, M., Song, D., Guan, W., Janssen, J. W. H., van Wijk, R., Navalsky, B. E., Peng, K., Donker, A. E., Stegmann, A. P. A., and Lee, F. S. (2018) Loss-of-function zinc finger mutation in the EGLN1 gene associated with erythrocytosis. Blood 132, 1455–1458.	2018
	Cys42Arg	C42R	124T>C	1	missense	Y	N	N		10	15.9	NA		M	Sinnema, M., Song, D., Guan, W., Janssen, J. W. H., van Wijk, R., Navalsky, B. E., Peng, K., Donker, A. E., Stegmann, A. P. A., and Lee, F. S. (2018) Loss-of-function zinc finger mutation in the EGLN1 gene associated with erythrocytosis. Blood 132, 1455–1458.	2018
	Cys42Arg	C42R	124T>C	1	missense	Y	N	N		6.7	13.9	NA		F	Sinnema, M., Song, D., Guan, W., Janssen, J. W. H., van Wijk, R., Navalsky, B. E., Peng, K., Donker, A. E., Stegmann, A. P. A., and Lee, F. S. (2018) Loss-of-function zinc finger mutation in the EGLN1 gene associated with erythrocytosis. Blood 132, 1455–1458.	2018
	Asp50His	D50H	148G>C	1	missense	N	Y	N	port. vein thrombosis	17	19.9	39		M	Delamare M, Le Roy A, Pacault M, Schmitt L, Garrec C, Maaziz N, Myllykoski M, Rimbert A, Karaghiannis V, Aral B, Catherwood M, Airaud F, Mansour-Hendili L, Hoogewijs D, Peroni E, Idriss S, Lesieur V, Caillaud A, Si-Tayeb K, Chariau C, Gaignerie A, Rab M, Haferlach T, Meggendorfer M, Bézieau S, Benetti A, Casadevall N, Hirsch P, Rose C, Wemeau M, Galacteros F, Cassinat B, Bellosillo B, Bento C, Va…	2023
	Trp51X	W51X	153G>A	1	nonsense	Y	N	Y	chronic myeloid leukemia	NA	14.5	NA	17	F	Provenzano, A., Chetta, M., De Filpo, G., Cantini, G., La Barbera, A., Nesi, G., Santi, R., Martinelli, S., Rapizzi, E., Luconi, M., Maggi, M., Mannelli, M., Ercolino, T., and Canu, L. (2022) Novel Germline PHD2 Variant in a Metastatic Pheochromocytoma and Chronic Myeloid Leukemia, but in the Absence of Polycythemia. Medicina (Kaunas) 58, 1113.	2022
	Lys55Asn	K55N	165G>C	1	missense	NA	Y	N		9.5	14.1	NA		NA	Oliveira, J. L., Coon, L. M., Frederick, L. A., Hein, M., Swanson, K. C., Savedra, M. E., Porter, T. R., Patnaik, M. M., Tefferi, A., Pardanani, A., Grebe, S. K., Viswanatha, D. S., and Hoyer, J. D. (2018) Genotype–phenotype correlation of hereditary erythrocytosis mutations, a single center experience. American Journal of Hematology 93, 1029–1041.	2018
	Lys55Asn	K55N	165G>C	1	missense	NA	Y	N		9.5	16.2	NA		NA	Oliveira, J. L., Coon, L. M., Frederick, L. A., Hein, M., Swanson, K. C., Savedra, M. E., Porter, T. R., Patnaik, M. M., Tefferi, A., Pardanani, A., Grebe, S. K., Viswanatha, D. S., and Hoyer, J. D. (2018) Genotype–phenotype correlation of hereditary erythrocytosis mutations, a single center experience. American Journal of Hematology 93, 1029–1041.	2018
	Pro77Leu	P77L	230C>T	1	missense	NA	Y	N		NA	NA	81		M	Delamare M, Le Roy A, Pacault M, Schmitt L, Garrec C, Maaziz N, Myllykoski M, Rimbert A, Karaghiannis V, Aral B, Catherwood M, Airaud F, Mansour-Hendili L, Hoogewijs D, Peroni E, Idriss S, Lesieur V, Caillaud A, Si-Tayeb K, Chariau C, Gaignerie A, Rab M, Haferlach T, Meggendorfer M, Bézieau S, Benetti A, Casadevall N, Hirsch P, Rose C, Wemeau M, Galacteros F, Cassinat B, Bellosillo B, Bento C, Va…	2023
	Ala96Val	A96V	287C>T	1	missense	NA	Y	N		6.3	22.6	25		F	Delamare M, Le Roy A, Pacault M, Schmitt L, Garrec C, Maaziz N, Myllykoski M, Rimbert A, Karaghiannis V, Aral B, Catherwood M, Airaud F, Mansour-Hendili L, Hoogewijs D, Peroni E, Idriss S, Lesieur V, Caillaud A, Si-Tayeb K, Chariau C, Gaignerie A, Rab M, Haferlach T, Meggendorfer M, Bézieau S, Benetti A, Casadevall N, Hirsch P, Rose C, Wemeau M, Galacteros F, Cassinat B, Bellosillo B, Bento C, Va…	2023
	Arg100Trp	R100W	298C>T	1	missense	NA	Y	N		NA	19	NA		NA	Oliveira, J. L., Coon, L. M., Frederick, L. A., Hein, M., Swanson, K. C., Savedra, M. E., Porter, T. R., Patnaik, M. M., Tefferi, A., Pardanani, A., Grebe, S. K., Viswanatha, D. S., and Hoyer, J. D. (2018) Genotype–phenotype correlation of hereditary erythrocytosis mutations, a single center experience. American Journal of Hematology 93, 1029–1041.	2018
	Ser104Phe	S104P	311C>T	1	missense	NA	Y	N		NA	NA	NA		NA	Oliveira, J. L., Coon, L. M., Frederick, L. A., Hein, M., Swanson, K. C., Savedra, M. E., Porter, T. R., Patnaik, M. M., Tefferi, A., Pardanani, A., Grebe, S. K., Viswanatha, D. S., and Hoyer, J. D. (2018) Genotype–phenotype correlation of hereditary erythrocytosis mutations, a single center experience. American Journal of Hematology 93, 1029–1041.	2018
	Pro120Leu	P120L	359C>T	1	missense	NA	Y	N		4.4	17.1	NA		NA	Oliveira, J. L., Coon, L. M., Frederick, L. A., Hein, M., Swanson, K. C., Savedra, M. E., Porter, T. R., Patnaik, M. M., Tefferi, A., Pardanani, A., Grebe, S. K., Viswanatha, D. S., and Hoyer, J. D. (2018) Genotype–phenotype correlation of hereditary erythrocytosis mutations, a single center experience. American Journal of Hematology 93, 1029–1041.	2018
	Pro120Leu	P120L	359C>T	1	missense	NA	Y	N		13	17.1	NA		NA	Oliveira, J. L., Coon, L. M., Frederick, L. A., Hein, M., Swanson, K. C., Savedra, M. E., Porter, T. R., Patnaik, M. M., Tefferi, A., Pardanani, A., Grebe, S. K., Viswanatha, D. S., and Hoyer, J. D. (2018) Genotype–phenotype correlation of hereditary erythrocytosis mutations, a single center experience. American Journal of Hematology 93, 1029–1041.	2018
	Cys127Ser	C127S	380G>C	1	missense	adaptation	N	N		NA	NA	NA		NA	Xiang, K., Ouzhuluobu, Peng, Y., Yang, Z., Zhang, X., Cui, C., Zhang, H., Li, M., Zhang, Y., Bianba, Gonggalanzi, Basang, Ciwangsangbu, Wu, T., Chen, H., Shi, H., Qi, X., and Su, B. (2013) Identification of a Tibetan-specific mutation in the hypoxic gene EGLN1 and its contribution to high-altitude adaptation. Mol Biol Evol 30, 1889–98.	2013
	Cys127Ser	C127S	380G>C	1	missense	NA	Y	N		6	16.8	36		F	Bento, C., Almeida, H., Maia, T. M., Relvas, L., Oliveira, A. C., Rossi, C., Girodon, F., Fernandez-Lago, C., Aguado-Diaz, A., Fraga, C., Costa, R. M., Araujo, A. L., Silva, J., Vitoria, H., Miguel, N., Silveira, M. P., Martin-Nunez, G., and Ribeiro, M. L. (2013) Molecular study of congenital erythrocytosis in 70 unrelated patients revealed a potential causal mutation in less than half of the cas…	2013
	Cys127Ser	C127S	380G>C	1	missense	NA	Y	N	high ferritin level	11	18.8	34		M	Bento, C., Almeida, H., Maia, T. M., Relvas, L., Oliveira, A. C., Rossi, C., Girodon, F., Fernandez-Lago, C., Aguado-Diaz, A., Fraga, C., Costa, R. M., Araujo, A. L., Silva, J., Vitoria, H., Miguel, N., Silveira, M. P., Martin-Nunez, G., and Ribeiro, M. L. (2013) Molecular study of congenital erythrocytosis in 70 unrelated patients revealed a potential causal mutation in less than half of the cas…	2013
	Cys127Ser	C127S	380G>C	1	missense	NA	Y	N		5	18.2	23		M	Bento, C., Almeida, H., Maia, T. M., Relvas, L., Oliveira, A. C., Rossi, C., Girodon, F., Fernandez-Lago, C., Aguado-Diaz, A., Fraga, C., Costa, R. M., Araujo, A. L., Silva, J., Vitoria, H., Miguel, N., Silveira, M. P., Martin-Nunez, G., and Ribeiro, M. L. (2013) Molecular study of congenital erythrocytosis in 70 unrelated patients revealed a potential causal mutation in less than half of the cas…	2013
	Gln134X	Q134X	400C>T	1	nonsense	Y	Y	N	plethoric	6.3-10.6	18.4	56		M	Bonnin, A., Gardie, B., Girodon, F., Airaud, F., Garrec, C., Bézieau, S., Vignon, G., Mottaz, P., Labrousse, J., and Lellouche, F. (2020) [A new case of rare erythrocytosis due to EGLN1 mutation with review of the literature]. Rev Med Interne 41, 196–199.	2020
	Ser154X	S154X	461C>A	1	nonsense	Y	Y	N		9.2	17.8	67		M	Gangat, N., Oliveira, J. L., Porter, T. R., Hoyer, J. D., Al-Kali, A., Patnaik, M. M., Pardanani, A., and Tefferi, A. (2022) Erythrocytosis associated with EPAS1(HIF2A), EGLN1(PHD2), VHL, EPOR or BPGM mutations: The Mayo Clinic experience. Haematologica 107, 1201–1204.	2022
	Ser154X	S154X	461C>A	1	nonsense	Y	Y	N		16.4	20	NA		M	Gangat, N., Oliveira, J. L., Porter, T. R., Hoyer, J. D., Al-Kali, A., Patnaik, M. M., Pardanani, A., and Tefferi, A. (2022) Erythrocytosis associated with EPAS1(HIF2A), EGLN1(PHD2), VHL, EPOR or BPGM mutations: The Mayo Clinic experience. Haematologica 107, 1201–1204.	2022
	Gln157His	Q157H	471G>C	1	missense	Y	Y	N	hyperplasia in myeloid lineages	29	17.1	65		M	Albiero E, Ruggeri M, Fortuna S, Finotto S, Bernardi M, Madeo D, and Rodeghiero F. Analysis of the oxygen sensing pathway genes in famililal chronic myeloproliferative neoplasms and identification of novel EGLN1 germ-line mutation	2011
	Gln157His	Q157H	471G>C	1	missense	Y	Y	N		8	17	40		M	Albiero E, Ruggeri M, Fortuna S, Finotto S, Bernardi M, Madeo D, and Rodeghiero F. Analysis of the oxygen sensing pathway genes in famililal chronic myeloproliferative neoplasms and identification of novel EGLN1 germ-line mutation	2011
	Gln157His	Q157H	471G>C	1	missense	N	Y	N	renal cysts	24	20.2	43		M	C. Ladroue, D. Hoogewijs, S. Gad et al., “Distinct deregulation of the hypoxia inducible factor by PHD2 mutants identified in germline DNA of patients with polycythemia,” Haematologica, vol. 97, no. 1, pp. 9–14, 2012.	2012
	Gln157Arg	Q157R	470A>G	1	missense	NA	Y	N		3.2	20.2	30		M	Delamare M, Le Roy A, Pacault M, Schmitt L, Garrec C, Maaziz N, Myllykoski M, Rimbert A, Karaghiannis V, Aral B, Catherwood M, Airaud F, Mansour-Hendili L, Hoogewijs D, Peroni E, Idriss S, Lesieur V, Caillaud A, Si-Tayeb K, Chariau C, Gaignerie A, Rab M, Haferlach T, Meggendorfer M, Bézieau S, Benetti A, Casadevall N, Hirsch P, Rose C, Wemeau M, Galacteros F, Cassinat B, Bellosillo B, Bento C, Va…	2023
	Tyr163X	Y163X	489C>A	1	nonsense	Y	Y	N	Ear pain, colit. Ulcer.	9.2	20.5	NA		M	Delamare M, Le Roy A, Pacault M, Schmitt L, Garrec C, Maaziz N, Myllykoski M, Rimbert A, Karaghiannis V, Aral B, Catherwood M, Airaud F, Mansour-Hendili L, Hoogewijs D, Peroni E, Idriss S, Lesieur V, Caillaud A, Si-Tayeb K, Chariau C, Gaignerie A, Rab M, Haferlach T, Meggendorfer M, Bézieau S, Benetti A, Casadevall N, Hirsch P, Rose C, Wemeau M, Galacteros F, Cassinat B, Bellosillo B, Bento C, Va…	2023
	Pro165GlnfsX9	P165QfsX9	494delC	1	frameshift	NA	Y	N	PV thrombosis, Spelnomegaly	51	17.1	NA		NA	Oliveira, J. L., Coon, L. M., Frederick, L. A., Hein, M., Swanson, K. C., Savedra, M. E., Porter, T. R., Patnaik, M. M., Tefferi, A., Pardanani, A., Grebe, S. K., Viswanatha, D. S., and Hoyer, J. D. (2018) Genotype–phenotype correlation of hereditary erythrocytosis mutations, a single center experience. American Journal of Hematology 93, 1029–1041.	2018
	Ser166LysfsX81	S166KX81	494dupC	1	frameshift	NA	Y	N		17.6	16.3	NA		NA	Oliveira, J. L., Coon, L. M., Frederick, L. A., Hein, M., Swanson, K. C., Savedra, M. E., Porter, T. R., Patnaik, M. M., Tefferi, A., Pardanani, A., Grebe, S. K., Viswanatha, D. S., and Hoyer, J. D. (2018) Genotype–phenotype correlation of hereditary erythrocytosis mutations, a single center experience. American Journal of Hematology 93, 1029–1041.	2018
	Ala190Leu	A190L	568_569delinsTT	1	missense	Y	Y	N		30	15	22		M	Delamare M, Le Roy A, Pacault M, Schmitt L, Garrec C, Maaziz N, Myllykoski M, Rimbert A, Karaghiannis V, Aral B, Catherwood M, Airaud F, Mansour-Hendili L, Hoogewijs D, Peroni E, Idriss S, Lesieur V, Caillaud A, Si-Tayeb K, Chariau C, Gaignerie A, Rab M, Haferlach T, Meggendorfer M, Bézieau S, Benetti A, Casadevall N, Hirsch P, Rose C, Wemeau M, Galacteros F, Cassinat B, Bellosillo B, Bento C, Va…	2023
I	Leu195His + Glu225Asp	L195H + E225D	584T>A + 675G>C	1	missense	Y	Y	N	ischaemic stroke	NA	18.9	78		F	Carillo S, Delamare M, Henry L, Maaziz N, Safraou H, Gardie B, Lavabre-Bertrand T. EGLN1 mutations in Cis can induce congenital erythrocytosis with thromboses by increasing protein instability. Br J Haematol. 2025 Jan 2. doi: 10.1111/bjh.19932. Epub ahead of print. PMID: 39746848.	2025
II.1 (proband)	Leu195His + Glu225Asp	L195H + E225D	584T>A + 675G>C	1	missense	Y	Y	N	cerebral ischaemic stroke	17	18.8	73		F	Carillo S, Delamare M, Henry L, Maaziz N, Safraou H, Gardie B, Lavabre-Bertrand T. EGLN1 mutations in Cis can induce congenital erythrocytosis with thromboses by increasing protein instability. Br J Haematol. 2025 Jan 2. doi: 10.1111/bjh.19932. Epub ahead of print. PMID: 39746848.	2025
II.3	Leu195His + Glu225Asp	L195H + E225D	584T>A + 675G>C	1	missense	Y	Y	N		11, 1	18.5	72		M	Carillo S, Delamare M, Henry L, Maaziz N, Safraou H, Gardie B, Lavabre-Bertrand T. EGLN1 mutations in Cis can induce congenital erythrocytosis with thromboses by increasing protein instability. Br J Haematol. 2025 Jan 2. doi: 10.1111/bjh.19932. Epub ahead of print. PMID: 39746848.	2025
III.1	Leu195His + Glu225Asp	L195H + E225D	584T>A + 675G>C	1	missense	Y	Y	N		5.3	17.1	45		F	Carillo S, Delamare M, Henry L, Maaziz N, Safraou H, Gardie B, Lavabre-Bertrand T. EGLN1 mutations in Cis can induce congenital erythrocytosis with thromboses by increasing protein instability. Br J Haematol. 2025 Jan 2. doi: 10.1111/bjh.19932. Epub ahead of print. PMID: 39746848.	2025
III.4	Leu195His + Glu225Asp	L195H + E225D	584T>A + 675G>C	1	missense	Y	N	N		NA	NA	NA		M	Carillo S, Delamare M, Henry L, Maaziz N, Safraou H, Gardie B, Lavabre-Bertrand T. EGLN1 mutations in Cis can induce congenital erythrocytosis with thromboses by increasing protein instability. Br J Haematol. 2025 Jan 2. doi: 10.1111/bjh.19932. Epub ahead of print. PMID: 39746848.	2025
IV.2	Leu195His + Glu225Asp	L195H + E225D	584T>A + 675G>C	1	missense	Y	Y	N		4.9	16.4	14		M	Carillo S, Delamare M, Henry L, Maaziz N, Safraou H, Gardie B, Lavabre-Bertrand T. EGLN1 mutations in Cis can induce congenital erythrocytosis with thromboses by increasing protein instability. Br J Haematol. 2025 Jan 2. doi: 10.1111/bjh.19932. Epub ahead of print. PMID: 39746848.	2025
IV.3	Leu195His + Glu225Asp	L195H + E225D	584T>A + 675G>C	1	missense	Y	Y	N		3	16.6	11		F	Carillo S, Delamare M, Henry L, Maaziz N, Safraou H, Gardie B, Lavabre-Bertrand T. EGLN1 mutations in Cis can induce congenital erythrocytosis with thromboses by increasing protein instability. Br J Haematol. 2025 Jan 2. doi: 10.1111/bjh.19932. Epub ahead of print. PMID: 39746848.	2025
	Glu196Gln	E196Q	586G>C	1	missense	NA	Y	N	late onset	10.9	20.2	NA		NA	Oliveira, J. L., Coon, L. M., Frederick, L. A., Hein, M., Swanson, K. C., Savedra, M. E., Porter, T. R., Patnaik, M. M., Tefferi, A., Pardanani, A., Grebe, S. K., Viswanatha, D. S., and Hoyer, J. D. (2018) Genotype–phenotype correlation of hereditary erythrocytosis mutations, a single center experience. American Journal of Hematology 93, 1029–1041.	2018
	Pro200Gln	P200Q	599C>A	1	missense	NA	Y	N	renal transplantation	90	17.9	22		M	C. Ladroue, D. Hoogewijs, S. Gad et al., “Distinct deregulation of the hypoxia inducible factor by PHD2 mutants identified in germline DNA of patients with polycythemia,” Haematologica, vol. 97, no. 1, pp. 9–14, 2012.	2012
	Met202Ilefs*72	M202Ifs*72	606delG	1	frameshift	NA	Y	N		NA	NA	NA		M	Al-Sheikh, M., Moradkhani, K., Lopez, M., Wajcman, H., and Prehu, C. (2008) Disturbance in the HIF-1alpha pathway associated with erythrocytosis: further evidences brought by frameshift and nonsense mutations in the prolyl hydroxylase domain protein 2 (PHD2) gene. Blood Cells Mol Dis 40, 160–5.	2008
	Met202Ilefs*72	M202Ifs*72	606delG	1	frameshift	NA	Y	N	inflammatory arthomyalgia, visual symptoms, arterial hypertension	20	19.2	54		M	Al-Sheikh, M., Moradkhani, K., Lopez, M., Wajcman, H., and Prehu, C. (2008) Disturbance in the HIF-1alpha pathway associated with erythrocytosis: further evidences brought by frameshift and nonsense mutations in the prolyl hydroxylase domain protein 2 (PHD2) gene. Blood Cells Mol Dis 40, 160–5.	2008
	Met202Ilefs*72	M202Ifs*72	606delG	1	frameshift	NA	Y	N		11.5	NA	NA		M	Al-Sheikh, M., Moradkhani, K., Lopez, M., Wajcman, H., and Prehu, C. (2008) Disturbance in the HIF-1alpha pathway associated with erythrocytosis: further evidences brought by frameshift and nonsense mutations in the prolyl hydroxylase domain protein 2 (PHD2) gene. Blood Cells Mol Dis 40, 160–5.	2008
	Asn203Lys	N203K	609C>G	1	missense	N	Y	N	hemorrage	2	23	61		M	Albiero E, Ruggeri M, Fortuna S, Finotto S, Bernardi M, Madeo D, and Rodeghiero F. Isolated erythrocytosis: study of 67 patients and identification of three novel germ-line mutations in the prolyl hydroxylase domain protein 2 (PHD2) gene. Haematologica 2012;97(1):123-127. doi:10.3324/haematol.2010.039545	2011
	Lys204Glu	K204Q	610G>A	1	missense	NA	Y	N	cardiac disease	20.1	22.1	46		M	C. Bento, M. J. Percy, B. Gardie et al., “Genetic basis of con- genital erythrocytosis: mutation update and online databases,” Human Mutation, vol. 35, no. 1, pp. 15–26, 2014.	2014
	Gly206Cys	G206C	616G>T	1	missense	NA	Y	N	large lower extremity hemangioma	14	17.2	28		F	Moore JA, Hubbi ME, Wang C, Wang Y, Luo W, Hofmann S, Rambally S. Isolated erythrocytosis associated with 3 novel missense mutation in the EGLN1 gene. Journal of Investigative Medicine High Impact Case Reports. 2020;8:1-4.	2020
	Gly206Cys	G206C	616G>T	1	missense	NA	Y	N	late onset, congential hemangioma	14	16.5	NA		NA	Oliveira, J. L., Coon, L. M., Frederick, L. A., Hein, M., Swanson, K. C., Savedra, M. E., Porter, T. R., Patnaik, M. M., Tefferi, A., Pardanani, A., Grebe, S. K., Viswanatha, D. S., and Hoyer, J. D. (2018) Genotype–phenotype correlation of hereditary erythrocytosis mutations, a single center experience. American Journal of Hematology 93, 1029–1041.	2018
	Val210del	V210del	629_631delTGG	1	deletion	Y	Y	N		NA	16.7	28		F	Delamare M, Le Roy A, Pacault M, Schmitt L, Garrec C, Maaziz N, Myllykoski M, Rimbert A, Karaghiannis V, Aral B, Catherwood M, Airaud F, Mansour-Hendili L, Hoogewijs D, Peroni E, Idriss S, Lesieur V, Caillaud A, Si-Tayeb K, Chariau C, Gaignerie A, Rab M, Haferlach T, Meggendorfer M, Bézieau S, Benetti A, Casadevall N, Hirsch P, Rose C, Wemeau M, Galacteros F, Cassinat B, Bellosillo B, Bento C, Va…	2023
	Gln221X	Q221X	661C>T	1	nonsense	NA	Y	N	Klinefelter Syndrom, hypertension, type II diabetes	15	20.2	51		M	B. Gardie, M. J. Percy, D. Hoogewijs et al., “The role of PHD2 mutations in the pathogenesis of erythrocytosis,” Hypoxia, vol. 2014, no. 2, pp. 71–90, 2014.	2014
	Gln221X	Q221X	661C>T	1	nonsense	N	Y	N		NA	16.7	NA		F	Delamare M, Le Roy A, Pacault M, Schmitt L, Garrec C, Maaziz N, Myllykoski M, Rimbert A, Karaghiannis V, Aral B, Catherwood M, Airaud F, Mansour-Hendili L, Hoogewijs D, Peroni E, Idriss S, Lesieur V, Caillaud A, Si-Tayeb K, Chariau C, Gaignerie A, Rab M, Haferlach T, Meggendorfer M, Bézieau S, Benetti A, Casadevall N, Hirsch P, Rose C, Wemeau M, Galacteros F, Cassinat B, Bellosillo B, Bento C, Va…	2023
	Ile222Ser	I222S	665T>G	1	missense	NA	Y	N		NA	NA	50		M	Delamare M, Le Roy A, Pacault M, Schmitt L, Garrec C, Maaziz N, Myllykoski M, Rimbert A, Karaghiannis V, Aral B, Catherwood M, Airaud F, Mansour-Hendili L, Hoogewijs D, Peroni E, Idriss S, Lesieur V, Caillaud A, Si-Tayeb K, Chariau C, Gaignerie A, Rab M, Haferlach T, Meggendorfer M, Bézieau S, Benetti A, Casadevall N, Hirsch P, Rose C, Wemeau M, Galacteros F, Cassinat B, Bellosillo B, Bento C, Va…	2023
	Arg227Alafs*20	R227Afs*20	678dupG	1	frameshift	Y	Y	N	Headaches	8.13	18.3	34		M	B. Gardie, M. J. Percy, D. Hoogewijs et al., “The role of PHD2 mutations in the pathogenesis of erythrocytosis,” Hypoxia, vol. 2014, no. 2, pp. 71–90, 2014.	2014
	Arg227Alafs*20	R227Afs*20	678dupG	1	frameshift	Y	Y	N	Headaches	NA	17.2	48		M	B. Gardie, M. J. Percy, D. Hoogewijs et al., “The role of PHD2 mutations in the pathogenesis of erythrocytosis,” Hypoxia, vol. 2014, no. 2, pp. 71–90, 2014.	2014
	Arg227Alafs*20	R227Afs*20	678dupG	1	frameshift	Y	Y	N	Headaches	NA	17.4	43		F	B. Gardie, M. J. Percy, D. Hoogewijs et al., “The role of PHD2 mutations in the pathogenesis of erythrocytosis,” Hypoxia, vol. 2014, no. 2, pp. 71–90, 2014.	2014
	Ala228Ser	A228S	682G>T	1	missense	N	Y	Y	cystic kidney disease, primary hyperparathryoidism, diabetes mellitus, hypothyroidism, gout, hyperlipidemia, 3 miscarriages	40.5	13.9	16	14,48	F	Yang C, Zhuang Z, Fliedner SMJ, Shankavaram U, Sun MG, Bullova P, Zhu R, Elkahloun AG, Kourlas PJ, Merino M, Kebebew E, Pacak K. Germ-line PHD1 and PHD2 mutations detected in patients with PPGL-polycythemia. JMolMed. 2014; 93:93-104.	2014
	Gly233Ala	G233A	698G>C	1	missense	Y	Y	N		10.4	17.4	31		M	Delamare M, Le Roy A, Pacault M, Schmitt L, Garrec C, Maaziz N, Myllykoski M, Rimbert A, Karaghiannis V, Aral B, Catherwood M, Airaud F, Mansour-Hendili L, Hoogewijs D, Peroni E, Idriss S, Lesieur V, Caillaud A, Si-Tayeb K, Chariau C, Gaignerie A, Rab M, Haferlach T, Meggendorfer M, Bézieau S, Benetti A, Casadevall N, Hirsch P, Rose C, Wemeau M, Galacteros F, Cassinat B, Bellosillo B, Bento C, Va…	2023
	Gly238Arg	G238R	712G>C	1	missense	Y	Y	N		12	NA	31		M	Ma, Q., Hu, R., Hui, W. et al. Two Novel Genetic Variants Involved in the Oxygen Sensing Pathway in JAK2-unmutated Erythrocytosis. Biochem Genet (2024). https://doi.org/10.1007/s10528-024-10752-2	2024
	Gln239X	Q239X	715C>T	1	nonsense	Y	Y	N	Myocardial infarction	10	18	51		F	Delamare M, Le Roy A, Pacault M, Schmitt L, Garrec C, Maaziz N, Myllykoski M, Rimbert A, Karaghiannis V, Aral B, Catherwood M, Airaud F, Mansour-Hendili L, Hoogewijs D, Peroni E, Idriss S, Lesieur V, Caillaud A, Si-Tayeb K, Chariau C, Gaignerie A, Rab M, Haferlach T, Meggendorfer M, Bézieau S, Benetti A, Casadevall N, Hirsch P, Rose C, Wemeau M, Galacteros F, Cassinat B, Bellosillo B, Bento C, Va…	2023
	Gln239X	Q239X	715C>T	1	nonsense	NA	Y	N	hypertension	11	20	52		M	B. Gardie, M. J. Percy, D. Hoogewijs et al., “The role of PHD2 mutations in the pathogenesis of erythrocytosis,” Hypoxia, vol. 2014, no. 2, pp. 71–90, 2014.	2014
	Gln239X	Q239X	715C>T	1	nonsense	Y	Y	N	adrenal adenoma	NA	NA	48		F	Ansar, S., Malcolmson, J., Farncombe, K. M., Yee, K., Kim, R. H., and Sibai, H. (2022) Clinical implementation of genetic testing in adults for hereditary hematologic malignancy syndromes. Genetics in Medicine.	2022
	Lys244ArgfsX31	K244RfsX31	729_730dup	1	frameshift	NA	Y	N		NA	NA	73		NA	Oliveira, J. L., Coon, L. M., Frederick, L. A., Hein, M., Swanson, K. C., Savedra, M. E., Porter, T. R., Patnaik, M. M., Tefferi, A., Pardanani, A., Grebe, S. K., Viswanatha, D. S., and Hoyer, J. D. (2018) Genotype–phenotype correlation of hereditary erythrocytosis mutations, a single center experience. American Journal of Hematology 93, 1029–1041.	2018
	Asp254His	D254H	760G>C	1	missense	NA	Y	N		36	19.2	25		M	C. Ladroue, D. Hoogewijs, S. Gad et al., “Distinct deregulation of the hypoxia inducible factor by PHD2 mutants identified in germline DNA of patients with polycythemia,” Haematologica, vol. 97, no. 1, pp. 9–14, 2012.	2012
	Lys255Glu	K255N	763A>G	1	missense	N	Y	N	post renal transplant erytrhocytosis	NA	16.9	58		F	Delamare M, Le Roy A, Pacault M, Schmitt L, Garrec C, Maaziz N, Myllykoski M, Rimbert A, Karaghiannis V, Aral B, Catherwood M, Airaud F, Mansour-Hendili L, Hoogewijs D, Peroni E, Idriss S, Lesieur V, Caillaud A, Si-Tayeb K, Chariau C, Gaignerie A, Rab M, Haferlach T, Meggendorfer M, Bézieau S, Benetti A, Casadevall N, Hirsch P, Rose C, Wemeau M, Galacteros F, Cassinat B, Bellosillo B, Bento C, Va…	2023
	Gly265Val	G265V	794_795delinsTT	1	missense	Y	Y	N	psychomotor retardation	NA	15.4	14		M	Delamare M, Le Roy A, Pacault M, Schmitt L, Garrec C, Maaziz N, Myllykoski M, Rimbert A, Karaghiannis V, Aral B, Catherwood M, Airaud F, Mansour-Hendili L, Hoogewijs D, Peroni E, Idriss S, Lesieur V, Caillaud A, Si-Tayeb K, Chariau C, Gaignerie A, Rab M, Haferlach T, Meggendorfer M, Bézieau S, Benetti A, Casadevall N, Hirsch P, Rose C, Wemeau M, Galacteros F, Cassinat B, Bellosillo B, Bento C, Va…	2023
	Thr268Ile	T268I	803C>T	1	missense	NA	Y	N		NA	NA	31		M	Delamare M, Le Roy A, Pacault M, Schmitt L, Garrec C, Maaziz N, Myllykoski M, Rimbert A, Karaghiannis V, Aral B, Catherwood M, Airaud F, Mansour-Hendili L, Hoogewijs D, Peroni E, Idriss S, Lesieur V, Caillaud A, Si-Tayeb K, Chariau C, Gaignerie A, Rab M, Haferlach T, Meggendorfer M, Bézieau S, Benetti A, Casadevall N, Hirsch P, Rose C, Wemeau M, Galacteros F, Cassinat B, Bellosillo B, Bento C, Va…	2023
	Ile269Thr	I269T	806T>C	1	missense	NA	Y	N		6.6	20.4	50		M	Delamare M, Le Roy A, Pacault M, Schmitt L, Garrec C, Maaziz N, Myllykoski M, Rimbert A, Karaghiannis V, Aral B, Catherwood M, Airaud F, Mansour-Hendili L, Hoogewijs D, Peroni E, Idriss S, Lesieur V, Caillaud A, Si-Tayeb K, Chariau C, Gaignerie A, Rab M, Haferlach T, Meggendorfer M, Bézieau S, Benetti A, Casadevall N, Hirsch P, Rose C, Wemeau M, Galacteros F, Cassinat B, Bellosillo B, Bento C, Va…	2023
	Ile269Thr	I269T	806T>C	1	missense	Y	Y	N		3.5	17.1	18		M	Delamare M, Le Roy A, Pacault M, Schmitt L, Garrec C, Maaziz N, Myllykoski M, Rimbert A, Karaghiannis V, Aral B, Catherwood M, Airaud F, Mansour-Hendili L, Hoogewijs D, Peroni E, Idriss S, Lesieur V, Caillaud A, Si-Tayeb K, Chariau C, Gaignerie A, Rab M, Haferlach T, Meggendorfer M, Bézieau S, Benetti A, Casadevall N, Hirsch P, Rose C, Wemeau M, Galacteros F, Cassinat B, Bellosillo B, Bento C, Va…	2023
	Ile269Thr	I269T	806T>C	1	missense	N	Y	N		6	18.3	43		M	Delamare M, Le Roy A, Pacault M, Schmitt L, Garrec C, Maaziz N, Myllykoski M, Rimbert A, Karaghiannis V, Aral B, Catherwood M, Airaud F, Mansour-Hendili L, Hoogewijs D, Peroni E, Idriss S, Lesieur V, Caillaud A, Si-Tayeb K, Chariau C, Gaignerie A, Rab M, Haferlach T, Meggendorfer M, Bézieau S, Benetti A, Casadevall N, Hirsch P, Rose C, Wemeau M, Galacteros F, Cassinat B, Bellosillo B, Bento C, Va…	2023
	Ile269Thr	I269T	806T>C	1	missense	Y	Y	N		17.9	18.6	22		M	Delamare M, Le Roy A, Pacault M, Schmitt L, Garrec C, Maaziz N, Myllykoski M, Rimbert A, Karaghiannis V, Aral B, Catherwood M, Airaud F, Mansour-Hendili L, Hoogewijs D, Peroni E, Idriss S, Lesieur V, Caillaud A, Si-Tayeb K, Chariau C, Gaignerie A, Rab M, Haferlach T, Meggendorfer M, Bézieau S, Benetti A, Casadevall N, Hirsch P, Rose C, Wemeau M, Galacteros F, Cassinat B, Bellosillo B, Bento C, Va…	2023
	Ile269Thr	I269T	806T>C	1	missense	NA	Y	N		5.8	17.1	NA		M	Delamare M, Le Roy A, Pacault M, Schmitt L, Garrec C, Maaziz N, Myllykoski M, Rimbert A, Karaghiannis V, Aral B, Catherwood M, Airaud F, Mansour-Hendili L, Hoogewijs D, Peroni E, Idriss S, Lesieur V, Caillaud A, Si-Tayeb K, Chariau C, Gaignerie A, Rab M, Haferlach T, Meggendorfer M, Bézieau S, Benetti A, Casadevall N, Hirsch P, Rose C, Wemeau M, Galacteros F, Cassinat B, Bellosillo B, Bento C, Va…	2023
	Ile269Thr	I269T	806T>C	1	missense	NA	Y	N	neuroendocrine tumor	14.1	18.8	NA		NA	Oliveira, J. L., Coon, L. M., Frederick, L. A., Hein, M., Swanson, K. C., Savedra, M. E., Porter, T. R., Patnaik, M. M., Tefferi, A., Pardanani, A., Grebe, S. K., Viswanatha, D. S., and Hoyer, J. D. (2018) Genotype–phenotype correlation of hereditary erythrocytosis mutations, a single center experience. American Journal of Hematology 93, 1029–1041.	2018
	Leu271Argfs*15	L271Rfs*15	808_811dup	1	frameshift	NA	Y	N		NA	16.8	28		M	Delamare M, Le Roy A, Pacault M, Schmitt L, Garrec C, Maaziz N, Myllykoski M, Rimbert A, Karaghiannis V, Aral B, Catherwood M, Airaud F, Mansour-Hendili L, Hoogewijs D, Peroni E, Idriss S, Lesieur V, Caillaud A, Si-Tayeb K, Chariau C, Gaignerie A, Rab M, Haferlach T, Meggendorfer M, Bézieau S, Benetti A, Casadevall N, Hirsch P, Rose C, Wemeau M, Galacteros F, Cassinat B, Bellosillo B, Bento C, Va…	2023
	Leu272Pro	L272P	815T>C	1	missense	NA	Y	N		9.4	17.1	NA		NA	Oliveira, J. L., Coon, L. M., Frederick, L. A., Hein, M., Swanson, K. C., Savedra, M. E., Porter, T. R., Patnaik, M. M., Tefferi, A., Pardanani, A., Grebe, S. K., Viswanatha, D. S., and Hoyer, J. D. (2018) Genotype–phenotype correlation of hereditary erythrocytosis mutations, a single center experience. American Journal of Hematology 93, 1029–1041.	2018
	Met276Val	M276V	826A>G	1	missense	NA	Y	N		NA	18.1	NA		NA	Oliveira, J. L., Coon, L. M., Frederick, L. A., Hein, M., Swanson, K. C., Savedra, M. E., Porter, T. R., Patnaik, M. M., Tefferi, A., Pardanani, A., Grebe, S. K., Viswanatha, D. S., and Hoyer, J. D. (2018) Genotype–phenotype correlation of hereditary erythrocytosis mutations, a single center experience. American Journal of Hematology 93, 1029–1041.	2018
	Leu279Thrfs*43	L279Tfs*43	835del14	1	frameshift	Y	Y	N		1.3	18.8	73		M	Jang, J. H., Seo, J. Y., Jang, J., Jung, C. W., Lee, K. O., Kim, S. H., and Kim, H. J. (2014) Hereditary gene mutations in Korean patients with isolated erythrocytosis. Ann Hematol.	2014
	Leu279Pro	L279P	836T>C	1	missense	Y	Y	N	headaches, dizziness	12.2	19.8	52		M	Camps, C., Petousi, N., Bento, C., Cario, H., Copley, R. R., McMullin, M. F., van Wijk, R., Ratcliffe, P. J., Robbins, P. A., and Taylor, J. C. (2016) Gene panel sequencing improves the diagnostic work-up of patients with idiopathic erythrocytosis and identifies new mutations. Haematologica 101, 1306–1318.	2016
	Arg281Thrfs*4	R281Tfs*4	840dupA	1	frameshift	NA	Y	N	tinnitus	NA	17.8	22		M	Al-Sheikh, M., Moradkhani, K., Lopez, M., Wajcman, H., and Prehu, C. (2008) Disturbance in the HIF-1alpha pathway associated with erythrocytosis: further evidences brought by frameshift and nonsense mutations in the prolyl hydroxylase domain protein 2 (PHD2) gene. Blood Cells Mol Dis 40, 160–5.	2008
	Gly285Arg	G285R	853G>C	1	missense	NA	Y	N		NA	16.6	65		M	Bento, C., Percy, M. J., Gardie, B., Maia, T. M., van Wijk, R., Perrotta, S., Della Ragione, F., Almeida, H., Rossi, C., Girodon, F., Aström, M., Neumann, D., Schnittger, S., Landin, B., Minkov, M., Randi, M. L., Richard, S., Casadevall, N., Vainchenker, W., Rives, S., Hermouet, S., Ribeiro, M. L., McMullin, M. F., Cario, H., ECE-Consortium, Chauveau, A., Gimenez-Roqueplo, A.-P., Bressac-de-Pail…	2014
	Ser289Arg	S289R	867C>G	1	missense	Y	Y	N		9.1	17	NA		NA	Oliveira, J. L., Coon, L. M., Frederick, L. A., Hein, M., Swanson, K. C., Savedra, M. E., Porter, T. R., Patnaik, M. M., Tefferi, A., Pardanani, A., Grebe, S. K., Viswanatha, D. S., and Hoyer, J. D. (2018) Genotype–phenotype correlation of hereditary erythrocytosis mutations, a single center experience. American Journal of Hematology 93, 1029–1041.	2018
	Lys291Ile	K291I	872A>T	1	missense	Y	Y	N		5	17.6	29		M	Albiero, E., Ruggeri, M., Fortuna, S., Finotto, S., Bernardi, M., Madeo, D., and Rodeghiero, F. (2012) Isolated erythrocytosis: study of 67 patients and identification of three novel germ-line mutations in the prolyl hydroxylase domain protein 2 (PHD2) gene. Haematologica 97, 123–7.	2012
	Thr296Met	T296M	887C>T	1	missense	NA	Y	N	asthenia, hemochromatosis	11.9	18.6	22		M	Delamare M, Le Roy A, Pacault M, Schmitt L, Garrec C, Maaziz N, Myllykoski M, Rimbert A, Karaghiannis V, Aral B, Catherwood M, Airaud F, Mansour-Hendili L, Hoogewijs D, Peroni E, Idriss S, Lesieur V, Caillaud A, Si-Tayeb K, Chariau C, Gaignerie A, Rab M, Haferlach T, Meggendorfer M, Bézieau S, Benetti A, Casadevall N, Hirsch P, Rose C, Wemeau M, Galacteros F, Cassinat B, Bellosillo B, Bento C, Va…	2023
	Met299Thr	M299T	896T>C	2	missense	Y	Y	N	cerebrovascular accident, splenomegaly	NA	14.1	NA		NA	Oliveira, J. L., Coon, L. M., Frederick, L. A., Hein, M., Swanson, K. C., Savedra, M. E., Porter, T. R., Patnaik, M. M., Tefferi, A., Pardanani, A., Grebe, S. K., Viswanatha, D. S., and Hoyer, J. D. (2018) Genotype–phenotype correlation of hereditary erythrocytosis mutations, a single center experience. American Journal of Hematology 93, 1029–1041.	2018
	Met299Thr	M299T	896T>C	2	missense	Y	Y	N		NA	15.8	NA		NA	Oliveira, J. L., Coon, L. M., Frederick, L. A., Hein, M., Swanson, K. C., Savedra, M. E., Porter, T. R., Patnaik, M. M., Tefferi, A., Pardanani, A., Grebe, S. K., Viswanatha, D. S., and Hoyer, J. D. (2018) Genotype–phenotype correlation of hereditary erythrocytosis mutations, a single center experience. American Journal of Hematology 93, 1029–1041.	2018
	Tyr303Cys	Y303C	908A>G	2	missense	N	Y	N		15	18.8	35		M	Delamare M, Le Roy A, Pacault M, Schmitt L, Garrec C, Maaziz N, Myllykoski M, Rimbert A, Karaghiannis V, Aral B, Catherwood M, Airaud F, Mansour-Hendili L, Hoogewijs D, Peroni E, Idriss S, Lesieur V, Caillaud A, Si-Tayeb K, Chariau C, Gaignerie A, Rab M, Haferlach T, Meggendorfer M, Bézieau S, Benetti A, Casadevall N, Hirsch P, Rose C, Wemeau M, Galacteros F, Cassinat B, Bellosillo B, Bento C, Va…	2023
	Pro304Leu	P304L	911C>T	2	missense	Y	Y	N	Leucoclastis vasculitis	268	20.8	48		M	Gardie, B., Percy, M. J., Hoogewijs, D., Chowdhury, R., Bento, C., Arsenault, P. R., Richard, S., Almeida, H., Ewing, J., Lambert, F., McMullin, M. F., Schofield, C. J., and Lee, F. S. (2014) The role of PHD2 mutations in the pathogenesis of erythrocytosis. Hypoxia (Auckl) 2, 71–90.	2014
	Pro304Leu	P304L	911C>T	2	missense	Y	Y	N		60	18.3	48		M	Gardie, B., Percy, M. J., Hoogewijs, D., Chowdhury, R., Bento, C., Arsenault, P. R., Richard, S., Almeida, H., Ewing, J., Lambert, F., McMullin, M. F., Schofield, C. J., and Lee, F. S. (2014) The role of PHD2 mutations in the pathogenesis of erythrocytosis. Hypoxia (Auckl) 2, 71–90.	2014
	Pro304Leu	P304L	911C>T	2	missense	NA	Y	N		20	NA	NA		NA	Oliveira, J. L., Coon, L. M., Frederick, L. A., Hein, M., Swanson, K. C., Savedra, M. E., Porter, T. R., Patnaik, M. M., Tefferi, A., Pardanani, A., Grebe, S. K., Viswanatha, D. S., and Hoyer, J. D. (2018) Genotype–phenotype correlation of hereditary erythrocytosis mutations, a single center experience. American Journal of Hematology 93, 1029–1041.	2018
	Thr308Met	T308M	923C>T	2	missense	NA	Y	N		NA	NA	NA		NA	Khurana H, Muthusamy B, Yanamandra U, Garapati K, Premdeep H, Subramanian S, Pandey A. Whole Exome Sequencing Reveals Novel Variants in Unexplained Erythrocytosis. OMICS. 2023 Jul;27(7):299-304. doi: 10.1089/omi.2023.0059. Epub 2023 Jul 11. PMID: 37428608; PMCID: PMC10357103.	2023
	Arg312His	R312H	935G>A	2	missense	NA	Y	N		5	18.5	NA		M	Delamare M, Le Roy A, Pacault M, Schmitt L, Garrec C, Maaziz N, Myllykoski M, Rimbert A, Karaghiannis V, Aral B, Catherwood M, Airaud F, Mansour-Hendili L, Hoogewijs D, Peroni E, Idriss S, Lesieur V, Caillaud A, Si-Tayeb K, Chariau C, Gaignerie A, Rab M, Haferlach T, Meggendorfer M, Bézieau S, Benetti A, Casadevall N, Hirsch P, Rose C, Wemeau M, Galacteros F, Cassinat B, Bellosillo B, Bento C, Va…	2023
	Arg312His	R312H	935G>A	2	missense	Y	Y	N		45.5	15.6	NA		F	Delamare M, Le Roy A, Pacault M, Schmitt L, Garrec C, Maaziz N, Myllykoski M, Rimbert A, Karaghiannis V, Aral B, Catherwood M, Airaud F, Mansour-Hendili L, Hoogewijs D, Peroni E, Idriss S, Lesieur V, Caillaud A, Si-Tayeb K, Chariau C, Gaignerie A, Rab M, Haferlach T, Meggendorfer M, Bézieau S, Benetti A, Casadevall N, Hirsch P, Rose C, Wemeau M, Galacteros F, Cassinat B, Bellosillo B, Bento C, Va…	2023
	Arg312His	R312H	935G>A	2	missense	N	Y	N	cerebral vascular accident, obstructive sleep apnea syndrome	15	20.1	49		M	Delamare M, Le Roy A, Pacault M, Schmitt L, Garrec C, Maaziz N, Myllykoski M, Rimbert A, Karaghiannis V, Aral B, Catherwood M, Airaud F, Mansour-Hendili L, Hoogewijs D, Peroni E, Idriss S, Lesieur V, Caillaud A, Si-Tayeb K, Chariau C, Gaignerie A, Rab M, Haferlach T, Meggendorfer M, Bézieau S, Benetti A, Casadevall N, Hirsch P, Rose C, Wemeau M, Galacteros F, Cassinat B, Bellosillo B, Bento C, Va…	2023
	Arg312His	R312H	935G>A	2	missense	NA	Y	N		NA	NA	62		M	Delamare M, Le Roy A, Pacault M, Schmitt L, Garrec C, Maaziz N, Myllykoski M, Rimbert A, Karaghiannis V, Aral B, Catherwood M, Airaud F, Mansour-Hendili L, Hoogewijs D, Peroni E, Idriss S, Lesieur V, Caillaud A, Si-Tayeb K, Chariau C, Gaignerie A, Rab M, Haferlach T, Meggendorfer M, Bézieau S, Benetti A, Casadevall N, Hirsch P, Rose C, Wemeau M, Galacteros F, Cassinat B, Bellosillo B, Bento C, Va…	2023
	Pro317Arg	P317R	949_950delinsAG	2	missense	NA	Y	N	asymptomatic	NA	16.5	NA		NA	Oliveira, J. L., Coon, L. M., Frederick, L. A., Hein, M., Swanson, K. C., Savedra, M. E., Porter, T. R., Patnaik, M. M., Tefferi, A., Pardanani, A., Grebe, S. K., Viswanatha, D. S., and Hoyer, J. D. (2018) Genotype–phenotype correlation of hereditary erythrocytosis mutations, a single center experience. American Journal of Hematology 93, 1029–1041.	2018
	Pro317Arg	P317R	950C>G	2	missense	Y	Y	N		NA	18	45		M	Percy, M. J., Zhao, Q., Flores, A., Harrison, C., Lappin, T. R., Maxwell, P. H., McMullin, M. F., and Lee, F. S. (2006) A family with erythrocytosis establishes a role for prolyl hydroxylase domain protein 2 in oxygen homeostasis. Proc Natl Acad Sci U S A 103, 654–9.	2006
	Pro317Arg	P317R	950C>G	2	missense	Y	Y	N	menorrhagia, superficial thrombophlebitis	6.2	18	26		F	Percy, M. J., Zhao, Q., Flores, A., Harrison, C., Lappin, T. R., Maxwell, P. H., McMullin, M. F., and Lee, F. S. (2006) A family with erythrocytosis establishes a role for prolyl hydroxylase domain protein 2 in oxygen homeostasis. Proc Natl Acad Sci U S A 103, 654–9.	2006
	Pro317Arg	P317R	950C>G	2	missense	Y	Y	N	parathesia, enhanced pulmonary vascular and ventilatory response to acute hypoxia	8.6	18.3	30		M	Percy, M. J., Zhao, Q., Flores, A., Harrison, C., Lappin, T. R., Maxwell, P. H., McMullin, M. F., and Lee, F. S. (2006) A family with erythrocytosis establishes a role for prolyl hydroxylase domain protein 2 in oxygen homeostasis. Proc Natl Acad Sci U S A 103, 654–9.	2006
	Cys326Tyr	C326Y	977G>A	2	missense	NA	Y	N	asymptomatic	6	18.7	NA		NA	Oliveira, J. L., Coon, L. M., Frederick, L. A., Hein, M., Swanson, K. C., Savedra, M. E., Porter, T. R., Patnaik, M. M., Tefferi, A., Pardanani, A., Grebe, S. K., Viswanatha, D. S., and Hoyer, J. D. (2018) Genotype–phenotype correlation of hereditary erythrocytosis mutations, a single center experience. American Journal of Hematology 93, 1029–1041.	2018
	Tyr329His	Y329H	985T>C	2	missense	Y	Y	N		6.2	16.8	1		F	Delamare M, Le Roy A, Pacault M, Schmitt L, Garrec C, Maaziz N, Myllykoski M, Rimbert A, Karaghiannis V, Aral B, Catherwood M, Airaud F, Mansour-Hendili L, Hoogewijs D, Peroni E, Idriss S, Lesieur V, Caillaud A, Si-Tayeb K, Chariau C, Gaignerie A, Rab M, Haferlach T, Meggendorfer M, Bézieau S, Benetti A, Casadevall N, Hirsch P, Rose C, Wemeau M, Galacteros F, Cassinat B, Bellosillo B, Bento C, Va…	2023
	Asn331*	N331X	990dup	2	nonsense	Y	Y	N		NA	20.7	63		M	Delamare M, Le Roy A, Pacault M, Schmitt L, Garrec C, Maaziz N, Myllykoski M, Rimbert A, Karaghiannis V, Aral B, Catherwood M, Airaud F, Mansour-Hendili L, Hoogewijs D, Peroni E, Idriss S, Lesieur V, Caillaud A, Si-Tayeb K, Chariau C, Gaignerie A, Rab M, Haferlach T, Meggendorfer M, Bézieau S, Benetti A, Casadevall N, Hirsch P, Rose C, Wemeau M, Galacteros F, Cassinat B, Bellosillo B, Bento C, Va…	2023
	Trp334Arg	W334R	1000T>C	2	missense	Y	Y	N		6	17.4	31		F	Bento, C., Almeida, H., Maia, T. M., Relvas, L., Oliveira, A. C., Rossi, C., Girodon, F., Fernandez-Lago, C., Aguado-Diaz, A., Fraga, C., Costa, R. M., Araujo, A. L., Silva, J., Vitoria, H., Miguel, N., Silveira, M. P., Martin-Nunez, G., and Ribeiro, M. L. (2013) Molecular study of congenital erythrocytosis in 70 unrelated patients revealed a potential causal mutation in less than half of the cas…	2013
	Trp334Arg	W334R	1000T>C	2	missense	Y	Y	N		NA	17.6	35		M	Delamare M, Le Roy A, Pacault M, Schmitt L, Garrec C, Maaziz N, Myllykoski M, Rimbert A, Karaghiannis V, Aral B, Catherwood M, Airaud F, Mansour-Hendili L, Hoogewijs D, Peroni E, Idriss S, Lesieur V, Caillaud A, Si-Tayeb K, Chariau C, Gaignerie A, Rab M, Haferlach T, Meggendorfer M, Bézieau S, Benetti A, Casadevall N, Hirsch P, Rose C, Wemeau M, Galacteros F, Cassinat B, Bellosillo B, Bento C, Va…	2023
	Trp334X	W334X	1001G>A	2	nonsense	NA	Y	N		NA	17.8	NA		NA	Oliveira, J. L., Coon, L. M., Frederick, L. A., Hein, M., Swanson, K. C., Savedra, M. E., Porter, T. R., Patnaik, M. M., Tefferi, A., Pardanani, A., Grebe, S. K., Viswanatha, D. S., and Hoyer, J. D. (2018) Genotype–phenotype correlation of hereditary erythrocytosis mutations, a single center experience. American Journal of Hematology 93, 1029–1041.	2018
	Trp334X	W334X	1001G>A	2	nonsense	Y	Y	N		8.3	21.5	49		M	Wilson R, Syed N, Shah P. Erythrocytosis due to PHD2 mutations: a review of clinical presentation, diagnosis, and genetics. Case Reports in Hematology. 2016.	2016
	Val338Glyfs*18	V338Gfs*18	1010dup	2	frameshift	NA	Y	N	TIA	9.9	17.1	21		M	C. Bento, M. J. Percy, B. Gardie et al., “Genetic basis of con- genital erythrocytosis: mutation update and online databases,” Human Mutation, vol. 35, no. 1, pp. 15–26, 2014.	2014
	Ser339Thr	S339T	1016G>C	3	missense	NA	Y	N		12.6	14	NA		NA	Oliveira, J. L., Coon, L. M., Frederick, L. A., Hein, M., Swanson, K. C., Savedra, M. E., Porter, T. R., Patnaik, M. M., Tefferi, A., Pardanani, A., Grebe, S. K., Viswanatha, D. S., and Hoyer, J. D. (2018) Genotype–phenotype correlation of hereditary erythrocytosis mutations, a single center experience. American Journal of Hematology 93, 1029–1041.	2018
	Ile342Val	I342V	1024A>G	3	missense	NA	Y	N		NA	18.2	NA		NA	Oliveira, J. L., Coon, L. M., Frederick, L. A., Hein, M., Swanson, K. C., Savedra, M. E., Porter, T. R., Patnaik, M. M., Tefferi, A., Pardanani, A., Grebe, S. K., Viswanatha, D. S., and Hoyer, J. D. (2018) Genotype–phenotype correlation of hereditary erythrocytosis mutations, a single center experience. American Journal of Hematology 93, 1029–1041.	2018
	Arg344X	R344X	1030C>T	3	nonsense	N	Y	N		30	17	60		F	Gangat, N., Oliveira, J. L., Porter, T. R., Hoyer, J. D., Al-Kali, A., Patnaik, M. M., Pardanani, A., and Tefferi, A. (2022) Erythrocytosis associated with EPAS1(HIF2A), EGLN1(PHD2), VHL, EPOR or BPGM mutations: The Mayo Clinic experience. Haematologica 107, 1201–1204.	2022
	Arg344Gln	R344Q	1031G>A	3	missense	NA	Y	N	asymptomatic	NA	17	NA		NA	Oliveira, J. L., Coon, L. M., Frederick, L. A., Hein, M., Swanson, K. C., Savedra, M. E., Porter, T. R., Patnaik, M. M., Tefferi, A., Pardanani, A., Grebe, S. K., Viswanatha, D. S., and Hoyer, J. D. (2018) Genotype–phenotype correlation of hereditary erythrocytosis mutations, a single center experience. American Journal of Hematology 93, 1029–1041.	2018
	Gly349Cys	G349C	1045G>A	3	missense	Y	Y	N	Phlebitis, retinal vein occlusion	16.5	17.6	75		F	Delamare M, Le Roy A, Pacault M, Schmitt L, Garrec C, Maaziz N, Myllykoski M, Rimbert A, Karaghiannis V, Aral B, Catherwood M, Airaud F, Mansour-Hendili L, Hoogewijs D, Peroni E, Idriss S, Lesieur V, Caillaud A, Si-Tayeb K, Chariau C, Gaignerie A, Rab M, Haferlach T, Meggendorfer M, Bézieau S, Benetti A, Casadevall N, Hirsch P, Rose C, Wemeau M, Galacteros F, Cassinat B, Bellosillo B, Bento C, Va…	2023
	Gly349Ser	G349S	1045G>A	3	missense	N	Y	N		NA	16.9	21		M	Delamare M, Le Roy A, Pacault M, Schmitt L, Garrec C, Maaziz N, Myllykoski M, Rimbert A, Karaghiannis V, Aral B, Catherwood M, Airaud F, Mansour-Hendili L, Hoogewijs D, Peroni E, Idriss S, Lesieur V, Caillaud A, Si-Tayeb K, Chariau C, Gaignerie A, Rab M, Haferlach T, Meggendorfer M, Bézieau S, Benetti A, Casadevall N, Hirsch P, Rose C, Wemeau M, Galacteros F, Cassinat B, Bellosillo B, Bento C, Va…	2023
Brother	Pro358Ser	P358S	1072C>T	3	missense	Y	Y	N		NA	NA	NA		M	Anžej Doma S, Kraljić N, Kristan A, Debeljak N, Maver A, Pajič T, Preložnik Zupan I. Utility of next-generation sequencing in identifying congenital erythrocytosis in patients with idiopathic erythrocytosis. Front Med (Lausanne). 2024 Sep 6;11:1440712. doi: 10.3389/fmed.2024.1440712. PMID: 39309680; PMCID: PMC11412850.	2024
Brother	Pro358Ser	P358S	1072C>T	3	missense	Y	Y	N		NA	NA	NA		M	Anžej Doma S, Kraljić N, Kristan A, Debeljak N, Maver A, Pajič T, Preložnik Zupan I. Utility of next-generation sequencing in identifying congenital erythrocytosis in patients with idiopathic erythrocytosis. Front Med (Lausanne). 2024 Sep 6;11:1440712. doi: 10.3389/fmed.2024.1440712. PMID: 39309680; PMCID: PMC11412850.	2024
	Pro358Thr	P358T	1072C>A	3	missense	NA	Y	N		8.07	18.9	88		F	Delamare M, Le Roy A, Pacault M, Schmitt L, Garrec C, Maaziz N, Myllykoski M, Rimbert A, Karaghiannis V, Aral B, Catherwood M, Airaud F, Mansour-Hendili L, Hoogewijs D, Peroni E, Idriss S, Lesieur V, Caillaud A, Si-Tayeb K, Chariau C, Gaignerie A, Rab M, Haferlach T, Meggendorfer M, Bézieau S, Benetti A, Casadevall N, Hirsch P, Rose C, Wemeau M, Galacteros F, Cassinat B, Bellosillo B, Bento C, Va…	2023
	Phe360Ser	F360S	1079T>C	3	missense	NA	Y	N		NA	16.8	NA		NA	Oliveira, J. L., Coon, L. M., Frederick, L. A., Hein, M., Swanson, K. C., Savedra, M. E., Porter, T. R., Patnaik, M. M., Tefferi, A., Pardanani, A., Grebe, S. K., Viswanatha, D. S., and Hoyer, J. D. (2018) Genotype–phenotype correlation of hereditary erythrocytosis mutations, a single center experience. American Journal of Hematology 93, 1029–1041.	2018
	Leu363Arg	L363R	1088T>G	3	missense	Y	Y	N		8.45	19.5	34		M	Jalowiec, K. A., Vrotniakaite-Bajerciene, K., Capraru, A., Wojtovicova, T., Joncourt, R., Rovó, A., and Porret, N. A. (2021) NGS Evaluation of a Bernese Cohort of Unexplained Erythrocytosis Patients. Genes (Basel) 12, 1951.	2021
	Phe366Leu	F366L	1096T>C	3	missense	Y	Y	N	hypertension, headache, plethoric face, glibert's syndrome	NA	18.2	NA		M	Barradas, J., Rodrigues, C. D., Ferreira, G., Rocha, P., Constanço, C., Andrade, M. R., Bento, C., and Silva, H. M. (2018) Congenital erythrocytosis – discover of a new mutation in the EGLN1 gene. Clinical Case Reports 6, 1109–1111.	2018
	Phe366Leu	F366L	1096T>C	3	missense	NA	Y	N		15	18.8	46		M	Delamare M, Le Roy A, Pacault M, Schmitt L, Garrec C, Maaziz N, Myllykoski M, Rimbert A, Karaghiannis V, Aral B, Catherwood M, Airaud F, Mansour-Hendili L, Hoogewijs D, Peroni E, Idriss S, Lesieur V, Caillaud A, Si-Tayeb K, Chariau C, Gaignerie A, Rab M, Haferlach T, Meggendorfer M, Bézieau S, Benetti A, Casadevall N, Hirsch P, Rose C, Wemeau M, Galacteros F, Cassinat B, Bellosillo B, Bento C, Va…	2023
	Asp369Ala	D369A	1106A>C	3	missense	NA	Y	N		NA	18.9	NA		NA	Oliveira, J. L., Coon, L. M., Frederick, L. A., Hein, M., Swanson, K. C., Savedra, M. E., Porter, T. R., Patnaik, M. M., Tefferi, A., Pardanani, A., Grebe, S. K., Viswanatha, D. S., and Hoyer, J. D. (2018) Genotype–phenotype correlation of hereditary erythrocytosis mutations, a single center experience. American Journal of Hematology 93, 1029–1041.	2018
	Arg370Gly	R370G	1108C>G	3	missense	Y	Y	N		5	19.6	58		M	Delamare M, Le Roy A, Pacault M, Schmitt L, Garrec C, Maaziz N, Myllykoski M, Rimbert A, Karaghiannis V, Aral B, Catherwood M, Airaud F, Mansour-Hendili L, Hoogewijs D, Peroni E, Idriss S, Lesieur V, Caillaud A, Si-Tayeb K, Chariau C, Gaignerie A, Rab M, Haferlach T, Meggendorfer M, Bézieau S, Benetti A, Casadevall N, Hirsch P, Rose C, Wemeau M, Galacteros F, Cassinat B, Bellosillo B, Bento C, Va…	2023
	Arg370His	R370H	1109G>A	3	missense	NA	Y	N		NA	18.4	NA		NA	Oliveira, J. L., Coon, L. M., Frederick, L. A., Hein, M., Swanson, K. C., Savedra, M. E., Porter, T. R., Patnaik, M. M., Tefferi, A., Pardanani, A., Grebe, S. K., Viswanatha, D. S., and Hoyer, J. D. (2018) Genotype–phenotype correlation of hereditary erythrocytosis mutations, a single center experience. American Journal of Hematology 93, 1029–1041.	2018
	Arg371Cys	R371C	1111C>T	3	missense	NA	Y	N		9.5	16.8	47		M	B. Gardie, M. J. Percy, D. Hoogewijs et al., “The role of PHD2 mutations in the pathogenesis of erythrocytosis,” Hypoxia, vol. 2014, no. 2, pp. 71–90, 2014.	2013
	Arg371Cys	R371C	1111C>T	3	missense	Y	Y	N		11.2	17.2	35		F	Gangat, N., Oliveira, J. L., Porter, T. R., Hoyer, J. D., Al-Kali, A., Patnaik, M. M., Pardanani, A., and Tefferi, A. (2022) Erythrocytosis associated with EPAS1(HIF2A), EGLN1(PHD2), VHL, EPOR or BPGM mutations: The Mayo Clinic experience. Haematologica 107, 1201–1204.	2022
	Arg371His	R371H	1112G>A	3	missense	NA	Y	N	acute sagittal sinus thrombosis	12	18.8	29		M	Percy MJ, Furlow PW, Beer PA, Lappin TRJ, McMullin MF, Lee FS. A novel erythorcytosis-associated PHD2 mutation suggests the location of a HIF binding groove. Blood 2007;110(6): 2193-2196	2007
	Arg371His	R371H	1112G>A	3	missense	NA	Y	N		NA	19.1	17		M	C. Ladroue, D. Hoogewijs, S. Gad et al., “Distinct deregulation of the hypoxia inducible factor by PHD2 mutants identified in germline DNA of patients with polycythemia,” Haematologica, vol. 97, no. 1, pp. 9–14, 2012.	2012
	His374Arg	H374R	1121A>G	3	missense	Y	Y	Y	hypertension, homozygous HFE C282Y	18	20.2	30	43	M	C. Ladroue, R. Carcenac, M. Leporrier et al., “PHD2 mutation and congenital erythrocytosis with paraganglioma,” The New England Journal of Medicine, vol. 359, no. 25, pp. 2685–2692, 2008.	2008
	Glu375Gly	E375G	1124A>G	3	missense	NA	Y	N	asthma, headaches	NA	NA	NA		M	Anžej Doma S, Kraljić N, Kristan A, Debeljak N, Maver A, Pajič T, Preložnik Zupan I. Utility of next-generation sequencing in identifying congenital erythrocytosis in patients with idiopathic erythrocytosis. Front Med (Lausanne). 2024 Sep 6;11:1440712. doi: 10.3389/fmed.2024.1440712. PMID: 39309680; PMCID: PMC11412850.	2024
	Gln377X	Q377X	1129C>T	3	nonsense	NA	Y	N		69	18	34		F	Delamare M, Le Roy A, Pacault M, Schmitt L, Garrec C, Maaziz N, Myllykoski M, Rimbert A, Karaghiannis V, Aral B, Catherwood M, Airaud F, Mansour-Hendili L, Hoogewijs D, Peroni E, Idriss S, Lesieur V, Caillaud A, Si-Tayeb K, Chariau C, Gaignerie A, Rab M, Haferlach T, Meggendorfer M, Bézieau S, Benetti A, Casadevall N, Hirsch P, Rose C, Wemeau M, Galacteros F, Cassinat B, Bellosillo B, Bento C, Va…	2023
	Gln377X	Q377X	1129C>T	3	nonsense	NA	Y	N		10.7	17.8	35		F	Al-Sheikh, M., Moradkhani, K., Lopez, M., Wajcman, H., and Prehu, C. (2008) Disturbance in the HIF-1alpha pathway associated with erythrocytosis: further evidences brought by frameshift and nonsense mutations in the prolyl hydroxylase domain protein 2 (PHD2) gene. Blood Cells Mol Dis 40, 160–5.	2008
	Pro378Ser	P378S	1132C>T	3	missense	NA	Y	N		11.5	15.6	NA		NA	Oliveira, J. L., Coon, L. M., Frederick, L. A., Hein, M., Swanson, K. C., Savedra, M. E., Porter, T. R., Patnaik, M. M., Tefferi, A., Pardanani, A., Grebe, S. K., Viswanatha, D. S., and Hoyer, J. D. (2018) Genotype–phenotype correlation of hereditary erythrocytosis mutations, a single center experience. American Journal of Hematology 93, 1029–1041.	2018
	Pro378Ser	P378S	1132C>T	3	missense	N	Y	N		11	16.5	47		F	Moore JA, Hubbi ME, Wang C, Wang Y, Luo W, Hofmann S, Rambally S. Isolated erythrocytosis associated with 3 novel missense mutation in the EGLN1 gene. Journal of Investigative Medicine High Impact Case Reports. 2020;8:1-4.	2020
	Tyr384Tyr	Y384Y	1152C>T	4	silent	NA	Y	N	TIA	91	13.4	26		M	Delamare M, Le Roy A, Pacault M, Schmitt L, Garrec C, Maaziz N, Myllykoski M, Rimbert A, Karaghiannis V, Aral B, Catherwood M, Airaud F, Mansour-Hendili L, Hoogewijs D, Peroni E, Idriss S, Lesieur V, Caillaud A, Si-Tayeb K, Chariau C, Gaignerie A, Rab M, Haferlach T, Meggendorfer M, Bézieau S, Benetti A, Casadevall N, Hirsch P, Rose C, Wemeau M, Galacteros F, Cassinat B, Bellosillo B, Bento C, Va…	2023
	Ala385Thr	A385T	1153G>A	4	missense	NA	Y	N		9.2	17.3	NA		NA	Oliveira, J. L., Coon, L. M., Frederick, L. A., Hein, M., Swanson, K. C., Savedra, M. E., Porter, T. R., Patnaik, M. M., Tefferi, A., Pardanani, A., Grebe, S. K., Viswanatha, D. S., and Hoyer, J. D. (2018) Genotype–phenotype correlation of hereditary erythrocytosis mutations, a single center experience. American Journal of Hematology 93, 1029–1041.	2018
	Ala385Thr	A385T	1153G>A	4	missense	NA	Y	N		9.2	18.6	NA		NA	Oliveira, J. L., Coon, L. M., Frederick, L. A., Hein, M., Swanson, K. C., Savedra, M. E., Porter, T. R., Patnaik, M. M., Tefferi, A., Pardanani, A., Grebe, S. K., Viswanatha, D. S., and Hoyer, J. D. (2018) Genotype–phenotype correlation of hereditary erythrocytosis mutations, a single center experience. American Journal of Hematology 93, 1029–1041.	2018
	Ala385Thr	A385T	1153G>A	4	missense	NA	Y	N	paresthesia, headaches	9	18.5	52		M	Moore JA, Hubbi ME, Wang C, Wang Y, Luo W, Hofmann S, Rambally S. Isolated erythrocytosis associated with 3 novel missense mutation in the EGLN1 gene. Journal of Investigative Medicine High Impact Case Reports. 2020;8:1-4.	2020
	Trp389Arg	W389R	1165T>C	4	missense	Y	Y	N		2.4	20	41		M	Delamare M, Le Roy A, Pacault M, Schmitt L, Garrec C, Maaziz N, Myllykoski M, Rimbert A, Karaghiannis V, Aral B, Catherwood M, Airaud F, Mansour-Hendili L, Hoogewijs D, Peroni E, Idriss S, Lesieur V, Caillaud A, Si-Tayeb K, Chariau C, Gaignerie A, Rab M, Haferlach T, Meggendorfer M, Bézieau S, Benetti A, Casadevall N, Hirsch P, Rose C, Wemeau M, Galacteros F, Cassinat B, Bellosillo B, Bento C, Va…	2023
	Trp389Arg	W389R	1165T>C	4	missense	Y	Y	N	Myocardial infarction	50	18.1	26		F	Delamare M, Le Roy A, Pacault M, Schmitt L, Garrec C, Maaziz N, Myllykoski M, Rimbert A, Karaghiannis V, Aral B, Catherwood M, Airaud F, Mansour-Hendili L, Hoogewijs D, Peroni E, Idriss S, Lesieur V, Caillaud A, Si-Tayeb K, Chariau C, Gaignerie A, Rab M, Haferlach T, Meggendorfer M, Bézieau S, Benetti A, Casadevall N, Hirsch P, Rose C, Wemeau M, Galacteros F, Cassinat B, Bellosillo B, Bento C, Va…	2023
	Trp389Cys	W389C	1167G>T	4	missense	NA	Y	N		4.9	17.5	NA		NA	Oliveira, J. L., Coon, L. M., Frederick, L. A., Hein, M., Swanson, K. C., Savedra, M. E., Porter, T. R., Patnaik, M. M., Tefferi, A., Pardanani, A., Grebe, S. K., Viswanatha, D. S., and Hoyer, J. D. (2018) Genotype–phenotype correlation of hereditary erythrocytosis mutations, a single center experience. American Journal of Hematology 93, 1029–1041.	2018
	Arg398X	R398X	1192C>T	4	nonsense	Y	Y	N		6.5	19.3	26		M	C. Ladroue, D. Hoogewijs, S. Gad et al., “Distinct deregulation of the hypoxia inducible factor by PHD2 mutants identified in germline DNA of patients with polycythemia,” Haematologica, vol. 97, no. 1, pp. 9–14, 2012.	2012
	Arg398X	R398X	1192C>T	4	nonsense	Y	Y	N	suspected renal and liver angioma; uterin leiomyoma (51yr)	NA	NA	64		F	C. Ladroue, D. Hoogewijs, S. Gad et al., “Distinct deregulation of the hypoxia inducible factor by PHD2 mutants identified in germline DNA of patients with polycythemia,” Haematologica, vol. 97, no. 1, pp. 9–14, 2012.	2012
	Arg398X	R398X	1192C>T	4	nonsense	NA	Y	N		10.3	16	NA		NA	Oliveira, J. L., Coon, L. M., Frederick, L. A., Hein, M., Swanson, K. C., Savedra, M. E., Porter, T. R., Patnaik, M. M., Tefferi, A., Pardanani, A., Grebe, S. K., Viswanatha, D. S., and Hoyer, J. D. (2018) Genotype–phenotype correlation of hereditary erythrocytosis mutations, a single center experience. American Journal of Hematology 93, 1029–1041.	2018
	Arg398X	R398X	1192C>T	4	nonsense	NA	Y	N		10.3	16	NA		NA	Oliveira, J. L., Coon, L. M., Frederick, L. A., Hein, M., Swanson, K. C., Savedra, M. E., Porter, T. R., Patnaik, M. M., Tefferi, A., Pardanani, A., Grebe, S. K., Viswanatha, D. S., and Hoyer, J. D. (2018) Genotype–phenotype correlation of hereditary erythrocytosis mutations, a single center experience. American Journal of Hematology 93, 1029–1041.	2018
	Arg398X	R398X	1192C>T	4	nonsense	NA	Y	N		17.8	16.4	NA		NA	Oliveira, J. L., Coon, L. M., Frederick, L. A., Hein, M., Swanson, K. C., Savedra, M. E., Porter, T. R., Patnaik, M. M., Tefferi, A., Pardanani, A., Grebe, S. K., Viswanatha, D. S., and Hoyer, J. D. (2018) Genotype–phenotype correlation of hereditary erythrocytosis mutations, a single center experience. American Journal of Hematology 93, 1029–1041.	2018
	Arg398X	R398X	1192C>T	4	nonsense	NA	Y	N		17.8	16.4	NA		NA	Oliveira, J. L., Coon, L. M., Frederick, L. A., Hein, M., Swanson, K. C., Savedra, M. E., Porter, T. R., Patnaik, M. M., Tefferi, A., Pardanani, A., Grebe, S. K., Viswanatha, D. S., and Hoyer, J. D. (2018) Genotype–phenotype correlation of hereditary erythrocytosis mutations, a single center experience. American Journal of Hematology 93, 1029–1041.	2018
	Asp419Glu	D419E	1257T>G	5	missense	N	Y	N	thrombopenia	9.7	NA	23		M	Delamare M, Le Roy A, Pacault M, Schmitt L, Garrec C, Maaziz N, Myllykoski M, Rimbert A, Karaghiannis V, Aral B, Catherwood M, Airaud F, Mansour-Hendili L, Hoogewijs D, Peroni E, Idriss S, Lesieur V, Caillaud A, Si-Tayeb K, Chariau C, Gaignerie A, Rab M, Haferlach T, Meggendorfer M, Bézieau S, Benetti A, Casadevall N, Hirsch P, Rose C, Wemeau M, Galacteros F, Cassinat B, Bellosillo B, Bento C, Va…	2023
	Ser420Leu	S420L	1259C>T	5	missense	NA	Y	N		NA	18	NA		M	Delamare M, Le Roy A, Pacault M, Schmitt L, Garrec C, Maaziz N, Myllykoski M, Rimbert A, Karaghiannis V, Aral B, Catherwood M, Airaud F, Mansour-Hendili L, Hoogewijs D, Peroni E, Idriss S, Lesieur V, Caillaud A, Si-Tayeb K, Chariau C, Gaignerie A, Rab M, Haferlach T, Meggendorfer M, Bézieau S, Benetti A, Casadevall N, Hirsch P, Rose C, Wemeau M, Galacteros F, Cassinat B, Bellosillo B, Bento C, Va…	2023
	Lys423Glu	L423E	1267A>G	5	missense	N	Y	N		23	16.4	60		M	Albiero E, Ruggeri M, Fortuna S, Finotto S, Bernardi M, Madeo D, and Rodeghiero F. Isolated erythrocytosis: study of 67 patients and identification of three novel germ-line mutations in the prolyl hydroxylase domain protein 2 (PHD2) gene. Haematologica 2012;97(1):123-127. doi:10.3324/haematol.2010.039547	2011
	NA	NA	Deletion of the entire gene	"1-5	deletion	NA	Y	N		NA	15.6	56		F	Delamare M, Le Roy A, Pacault M, Schmitt L, Garrec C, Maaziz N, Myllykoski M, Rimbert A, Karaghiannis V, Aral B, Catherwood M, Airaud F, Mansour-Hendili L, Hoogewijs D, Peroni E, Idriss S, Lesieur V, Caillaud A, Si-Tayeb K, Chariau C, Gaignerie A, Rab M, Haferlach T, Meggendorfer M, Bézieau S, Benetti A, Casadevall N, Hirsch P, Rose C, Wemeau M, Galacteros F, Cassinat B, Bellosillo B, Bento C, Va…	2023
